# Supplementary material for: Materials design principles of amorphous cathode coatings for lithium-ion battery applications
Source: Royal Society of Chemistry journal article supplement (doi:10.1039/d2ta06051e), 2022-01-01
Supplement: d2ta06051e1.csv [file d2ta06051e1.csv]

Composition	V_red	|V_ox|	Reduction reaction	Oxidation reaction	dE_LPS	dE_HF	dE_cathode
Ag10Te4Br3	2.414668798333331	3.9883667004901935	0.5 Ag10Te4Br3 + 0.5 Li -> Ag5Te2Br + 0.5 LiBr	0.3333 Ag10Te4Br3 -> AgBr + 0.4444 AgTe3 + 1.889 Ag	-0.0384519919999986	0.0	-0.32364875288813655
Ag15P4S16Cl3	2.7075777800000385	4.221782189520824	0.25 Ag15P4S16Cl3 + 0.75 Li -> Ag3PS4 + 0.75 LiCl + 0.75 Ag	0.8 Ag15P4S16Cl3 -> P2S7 + 1.2 Ag5P(S2Cl)2 + S + 6 Ag	-0.04487887168478588	-0.022115154423077987	-0.6469490640828377
Ag2B8O13	3.5513609652776807	4.715121244333246	1.5 Ag2B8O13 + 3 Li -> Li3B11O18 + 0.5 B2O3 + 3 Ag	4 Ag2B8O13 -> Ag3O4 + 16 B2O3 + 5 Ag	-0.10814807949020366	-0.18522093324743194	-0.07814939721429859
Ag2Bi2S3Cl2	2.5336487316666463	3.8216815600000187	2 Ag2Bi2S3Cl2 + 3 Li -> AgBi3S5 + BiSCl + 3 LiCl + 3 Ag	1.333 Ag2Bi2S3Cl2 -> BiS2 + 1.333 AgBiSCl2 + 0.6667 Ag2S + 0.3333 Bi	-0.06778584197675563	-0.04653454901961229	-0.5680521140049757
Ag2Ge(S2O7)3	3.945619739583382	3.198859106458333	Ag2Ge(S2O7)3 + 2.667 Li -> Ag2S2O7 + GeO2 + 1.333 Li2S2O7 + 1.333 SO2	Ag2Ge(S2O7)3 -> GeO2 + 2 AgSO4 + 5.5 O2 + 4 S	-0.3693414174656282	-0.09981187824354132	-0.20367953515421755
Ag2H2IOF	3.764491138333309	4.090048492270836	2 Ag2H2IOF + Li -> Ag2F + 2 AgI + LiF + 2 H2O	9 Ag2H2IOF -> AgIO3 + 7.4 AgI + 6 H3OF + 0.6 IF5 + 9.6 Ag	-0.18034871318965884	-0.06714350476364239	-0.1643656720989881
Ag2H4(SO4)3	3.811292184166729	3.011352705520803	Ag2H4(SO4)3 + 2 Li -> Li2H4(SO4)3 + 2 Ag	1.25 Ag2H4(SO4)3 -> AgH5S2O9 + 1.5 AgSO4 + 0.25 S	-0.293062185184787	-0.08030479832352877	-0.13683088801303045
Ag2Hg7(As2I3)2	1.9395046589583314	3.900012659583332	0.5 Ag2Hg7(As2I3)2 + 2 Li -> AgI + 2 LiI + 2 As + 3.5 Hg	0.25 Ag2Hg7(As2I3)2 -> HgI + 0.5 AgI + As + 0.75 Hg	0.0	-0.003947282829669552	-0.39883332150169415
Ag2HgI4	2.006534303333326	4.757619752500005	0.5 Ag2HgI4 + 0.5 Li -> AgI + 0.5 LiI + 0.5 HgI	0.5 Ag2HgI4 -> AgI + I + 0.5 Hg	0.0	0.0	-0.19406092666909813
Ag2HgSI2	1.8903668266666789	4.2659028812499935	Ag2HgSI2 + Li -> AgHgSI + LiI + Ag	4 Ag2HgSI2 -> HgS4 + 8 AgI + 3 Hg	0.0	0.0	-0.41255962400000046
Ag2Mo2O7	3.5427174231249725	4.1557121341666505	Ag2Mo2O7 + 2 Li -> MoO3 + Li2MoO4 + 2 Ag	0.5 Ag2Mo2O7 -> MoO3 + 0.5 AgO + 0.5 Ag	-0.5446147512073876	-0.1434673973780478	-0.10229747693683278
Ag2P2H2O7	3.7410521518332978	4.483275474999959	2 Ag2P2H2O7 + 2 Li -> Ag2PHO4 + PH3O4 + 2 LiPO3 + 2 Ag	Ag2P2H2O7 -> AgPO3 + 0.1667 Ag3(PO4)2 + 0.6667 PH3O4 + 0.5 Ag	-0.1876491408727139	-0.1264443996922855	-0.14131061511905063
Ag2P2PdO7	4.3054293779444555	4.64381276416666	0.4286 Ag2P2PdO7 + 1.286 Li + 0.7143 Ag3(PO4)2 -> Ag3PO4 + 1.286 LiPO3 + 0.4286 PdO2	Ag2P2PdO7 -> AgPO3 + 0.5 P2PdO6 + 0.5 PdO2 + Ag	-0.3147166585960477	-0.12386121158334507	-0.1538694122500055
Ag2PHO4	3.64749290500006	4.468237913333299	2 Ag2PHO4 + Li -> Ag3PO4 + LiP(HO2)2 + Ag	3 Ag2PHO4 -> Ag3(PO4)2 + PH3O4 + 3 Ag	-0.24467117712250275	-0.12038145043858695	-0.12134064729166516
Ag2PSe3	1.8145857880323941	4.162378880833338	3.895 Ag2PSe3 + 11.37 Li -> Ag7PSe6 + 0.2632 Ag3P11 + 5.684 Li2Se	3 Ag2PSe3 -> Ag3PSe4 + P2Se5 + 3 Ag	-8.212394366861424e-16	-0.025902632025749606	-0.679327422961262
Ag2PdCl4	2.9187740266666626	4.533470212499983	Ag2PdCl4 + 3 Li -> AgPd + AgCl + 3 LiCl	Ag2PdCl4 -> Ag2Cl3 + 0.5 PdCl2 + 0.5 Pd	-0.21644601452828716	0.0	-0.094460624892856
Ag2S	1.9216261416666693	4.17362102822917	Ag2S + 2 Li -> Li2S + 2 Ag	Ag2S -> S + 2 Ag	0.0	0.0	-0.5243853121666626
Ag2S2O7	3.844219267083286	2.906729526770845	1.143 Ag2S2O7 + 1.143 Li -> Ag2SO4 + 0.1429 Ag2S + 0.5714 Li2S2O7	4 Ag2S2O7 -> Ag2SO4 + 6 AgSO4 + S	-0.36424202972791564	-0.07866439117021362	-0.16340374116438205
Ag2SO4	3.7583278845833537	3.359491839270835	0.5 Ag2SO4 + Li + AgO -> Ag2O + 0.5 Li2SO4	0.75 Ag2SO4 -> AgO + 0.5 AgSO4 + 0.25 S	-0.35803108165354836	-0.07256740169354847	-0.12893066233333395
Ag2SeO3	3.2766091033333278	4.1288963366666644	4 Ag2SeO3 + 6 Li -> Ag2Se + 3 Li2SeO4 + 6 Ag	2 Ag2SeO3 -> Ag2SeO4 + SeO2 + 2 Ag	-0.5041306431085584	-0.11634463183333954	-0.1245300021557949
Ag2SeO4	3.546465187916642	4.7640152329166705	2 Ag2SeO4 + 2 Li -> Ag2O + Ag2SeO3 + Li2SeO4	2 Ag2SeO4 -> Se2O5 + 1.5 O2 + 4 Ag	-0.6009592242160466	-0.10919695442306432	-0.10829083388891503
Ag2Sn(S2O7)3	3.9993737955208353	3.0792842947568775	Ag2Sn(S2O7)3 + 1.333 Li -> Sn(SO4)2 + Ag2S2O7 + 0.6667 Li2S2O7 + 0.6667 SO2	Ag2Sn(S2O7)3 -> Sn(SO4)2 + 1.667 SO3 + 2 AgSO4 + 0.3333 S	-0.3615224529843717	-0.09643548236813393	-0.19044357576991633
Ag2TeS3	2.1305846227564054	4.5878359972916725	1.462 Ag2TeS3 + 2 Li -> Li2TeS3 + 1.385 Ag2S + 0.1538 AgTe3	3 Ag2TeS3 -> AgTe3 + 9 S + 5 Ag	0.0	0.0	-0.6110715837654339
Ag3AsS3	1.9325698500000097	3.9949184870833316	Ag3AsS3 + 3 Li -> Li3AsS3 + 3 Ag	5 Ag3AsS3 -> As2S3 + 3 Ag3AsS4 + 6 Ag	-6.273857474092814e-15	0.0	-0.5875196154081647
Ag3AsSe3	1.7669043579166663	4.065984080555553	0.3333 Ag3AsSe3 + 2 Li -> Li2Se + 0.3333 As + Ag	2 Ag3AsSe3 -> As2Se3 + 0.6 AgSe5 + 5.4 Ag	0.0	0.0	-0.39130246763645604
Ag3AuS2	1.9721915750000019	4.1585997666666685	2.333 Ag3AuS2 + 4 Li -> Ag3Au + 1.333 Li3AuS2 + 2 Ag2S	Ag3AuS2 -> AgAuS2 + 2 Ag	8.054196950120959e-16	0.0	-0.5297852749999985
Ag3Ge5P6	1.0428158102777632	3.9731064350000054	1.167 Ag3Ge5P6 + 3 Li -> Li3P7 + 5.833 Ge + 3.5 Ag	0.1667 Ag3Ge5P6 -> P + 0.8333 Ge + 0.5 Ag	-0.011544769005271682	-0.052019361044776224	-1.040567049769911
Ag3P11	1.1236937245454428	3.9572679322222246	0.6364 Ag3P11 + 3 Li -> Li3P7 + 1.909 Ag	0.09091 Ag3P11 -> P + 0.2727 Ag	-1.0847783067052013e-15	-0.05906872568548416	-1.1090858950866191
Ag3PS4	2.2904862345833266	4.221161713854166	2 Li + 2.333 P2S5 -> P4S9 + 0.6667 Li3PS4	2 Ag3PS4 -> P2S7 + S + 6 Ag	-9.58879962931203e-16	-0.02762220916666669	-0.6860393715312529
Ag3SnP7	1.0348966066666716	3.0705833043181845	Ag3SnP7 + 3 Li -> Li3P7 + Ag3Sn	1.571 Ag3SnP7 -> Ag3P11 + 1.714 Ag + 1.571 Sn	0.0	-0.05919011051075418	-1.0689051688864823
Ag4Hg4S4BrCl3	2.555979596666697	4.310849960104154	Ag4Hg4S4BrCl3 + 3 Li -> AgHgSBr + 3 LiCl + 3 HgS + 3 Ag	Ag4Hg4S4BrCl3 -> AgBr + 1.25 Hg3(SCl)2 + 0.25 HgCl2 + 1.5 S + 3 Ag	-0.06854350356249994	0.0	-0.46640035121211176
Ag4Mo2Se3O16	3.7870171191665882	4.91971299416651	0.5 Ag4Mo2Se3O16 + Li -> Ag2SeO3 + MoO3 + 0.5 Li2SeO4	1.5 Ag4Mo2Se3O16 -> Se2O5 + 2.5 Ag2SeO4 + 3 MoO3 + Ag	-0.5766529267176885	-0.12256881903284889	-0.12566321418368265
Ag4PIO4	3.549281387500014	4.189155028333328	Ag4PIO4 + 3 Li -> Li3PO4 + AgI + 3 Ag	3 Ag4PIO4 -> AgIO3 + 3 AgPO3 + 2 AgI + 6 Ag	-0.2756311953237778	-0.11685365566450323	-0.15716596136248984
Ag5BiO4	2.8341226746666703	3.950809619166656	0.8 Ag5BiO4 + Li -> LiAg3O2 + 0.4 Bi2O3 + Ag	Ag5BiO4 -> Ag2BiO3 + AgO + 2 Ag	-0.510819425185185	-0.1894839165441191	-0.0631515884493643
Ag5GeO4	3.351790248958377	3.8574768366666694	0.625 Ag5GeO4 + 0.5 Li -> Ag2O + 0.125 Li4Ge5O12 + 1.125 Ag	Ag5GeO4 -> Ag2GeO3 + Ag2O + Ag	-0.43487995050926687	-0.14794046897058055	-0.10451152270832842
Ag5Hg4P8Cl5	2.6758812222726895	3.860251295625016	1.375 Ag5Hg4P8Cl5 + 1.375 Li -> Ag3P11 + 5.5 HgCl + 1.375 LiCl + 3.875 Ag	1.435 Ag5Hg4P8Cl5 -> Ag3P11 + 5.739 HgCl + 0.4783 PCl3 + 4.174 Ag	-0.07816944162325834	-0.053927830691056444	-0.8833401367317699
Ag5P(S2Cl)2	2.733799548972195	4.285803582187498	4 Ag5P(S2Cl)2 + 60 Li + 18.33 PCl3 -> Ag15P4S16Cl3 + 1.667 Ag3P11 + 60 LiCl	2 Ag5P(S2Cl)2 -> P2S7 + 4 AgCl + S + 6 Ag	-0.07958628278845437	-0.01470757772727227	-0.6081402063120548
Ag5Te2Cl	2.6131201691666637	4.009383333416664	0.5 Ag5Te2Cl + 0.5 Li -> Ag2Te + 0.5 LiCl + 0.5 Ag	Ag5Te2Cl -> AgCl + 0.6667 AgTe3 + 3.333 Ag	-0.0556626292187552	0.0	-0.3239779520023123
Ag6Mo2ClO7F3	3.7265049300000217	4.354684175916662	Ag6Mo2ClO7F3 + 3 Li -> Ag2Mo2O7 + AgCl + 3 LiF + 3 Ag	1.333 Ag6Mo2ClO7F3 -> MoOF4 + 1.667 MoO3 + 3.333 AgO + 1.333 AgCl + 3.333 Ag	-0.48753483079961146	-0.10936419753333526	-0.130057505271993
Ag8GeS6	1.974301946041662	4.201603182812504	0.5 Ag8GeS6 + 2 Li -> Ag2S + 0.5 Li4GeS4 + 2 Ag	Ag8GeS6 -> Ag2GeS3 + 3 S + 6 Ag	-1.7157525452245714e-15	0.0	-0.5720740666666607
Ag8SnS6	1.993532460416667	3.5793006734375026	0.5 Ag8SnS6 + 2 Li -> Ag2S + 0.5 Li4SnS4 + 2 Ag	0.25 Ag8SnS6 -> Ag2S + 0.5 S + 0.25 Sn	0.0	0.0	-0.5749570377548233
AgAs(S8F3)2	2.5744444657440546	10.633337852291582	0.3 AgAs(S8F3)2 + 2.8 Li -> LiS4 + 0.1 Ag3AsS4 + 0.2 AsS2 + 1.8 LiF	AgAs(S8F3)2 -> As(S2F3)2 + 12 S + Ag	-0.0384050867459389	0.0	-0.6546655849791472
AgAs3H2O9	3.8294315014582985	4.639105536916722	6 AgAs3H2O9 + 4 Li -> LiAs3H2O9 + 3 LiAs2H3O7 + 6 AgAsO3 + As3HO6	2.5 AgAs3H2O9 -> As3(HO2)5 + 2.25 As2O5 + 0.625 O2 + 2.5 Ag	-0.398934090700366	-0.14808093511525167	-0.13055174368055145
AgAsF6	3.9198216966666655	5.79333327416669	AgAsF6 + Li -> LiAsF6 + Ag	2 AgAsF6 -> AgAsF7 + AsF5 + Ag	-0.3432512137209476	0.0	-0.23172550989583485
AgAsPbS3	2.0514522714582633	3.479811433750006	3 AgAsPbS3 + Li -> Ag3AsS3 + LiAsS2 + AsS + 3 PbS	3 AgAsPbS3 -> Ag3AsS4 + As2S3 + 2 PbS + Pb	-0.0004776684642746609	-0.06512543716666297	-0.6438560543333389
AgAu(IO3)4	3.893003469166663	4.768509315416644	AgAu(IO3)4 + Li -> AgI3O8 + 0.3333 Au2O3 + LiIO3 + 0.3333 Au	2 AgAu(IO3)4 -> I2O5 + 2 AgI3O8 + 1.5 O2 + 2 Au	-0.8307805259108592	-0.14953016908974814	-0.08541617517856814
AgAuCl4	3.210662286666664	5.320303384166674	AgAuCl4 + 3 Li -> AgCl + 3 LiCl + Au	2 AgAuCl4 -> Ag2Cl3 + 1.667 AuCl3 + 0.3333 Au	-0.2367571644999955	-5.801240055003376e-16	-0.08431692727941192
AgAuF4	4.343120704999996	5.0187974000000075	AgAuF4 + 3 Li -> AgF + 3 LiF + Au	3 AgAuF4 -> Ag(AuF4)2 + 2 AgF2 + Au	-0.6070543371250006	0.0	-0.29238926772059237
AgAuO2	3.0947431541666504	4.43720168666667	7 AgAuO2 + 6 Li -> Ag3Au + 2 Ag2O + 6 LiAuO2	2 AgAuO2 -> AgO + Au2O3 + Ag	-0.7399442588712106	-0.10692809928571922	-0.0426223981250069
AgB11H6CBr6	2.2164371898809385	6.131325561818191	5 AgB11H6CBr6 + 35 Li -> B13C2 + 3 B4C + 5 Li(BH)6 + 30 LiBr + 5 Ag	55 AgB11H6CBr6 -> B13C2 + 53 B4C + 30 B9H11 + 110 BBr3 + 55 Ag	-0.1383653148327122	-0.18830047827087948	-1.0443167676493608
AgBF4	4.047178475833313	5.353944302916688	AgBF4 + Li -> LiBF4 + Ag	2 AgBF4 -> AgBF5 + BF3 + Ag	-0.2339765160576821	0.0	-0.19394905037698518
AgBH2OF4	3.876743733333323	4.728538529666707	AgBH2OF4 + Li -> H2O + LiBF4 + Ag	12 AgBH2OF4 -> Ag3O4 + 8 BH3OF4 + 4 AgBF4 + 5 Ag	-0.15970515657012552	-0.05795348499999564	-0.1581974651553617
AgBi(IO3)4	3.7296101775000143	4.62031497166666	2 AgBi(IO3)4 + 2 Li -> Bi2I4O13 + 2 LiIO3 + 1.667 AgIO3 + 0.3333 AgI	3 AgBi(IO3)4 -> AgI3O8 + 3 Bi(IO3)3 + 0.25 Ag3O4 + 1.25 Ag	-0.7581044609538155	-0.16108347223887132	-0.08109401880101041
AgBi(PS3)2	2.0009615300196475	4.133616708229145	0.8889 AgBi(PS3)2 + 3 Li -> Li3PS4 + 0.07071 Ag3P11 + 0.4444 Bi2S3 + 0.6768 Ag	8 AgBi(PS3)2 -> P4S9 + P4S7 + 8 BiPS4 + 8 Ag	-9.774258946215753e-15	-0.0661002895108731	-0.8234848931649539
AgBi(PSe3)2	1.8034790884900915	4.425832794956165	14.8 AgBi(PSe3)2 + 121.2 Li -> Ag7PSe6 + 2.6 Ag3P11 + 7.4 Bi2Se3 + 60.6 Li2Se	2 AgBi(PSe3)2 -> Bi2(PSe3)3 + 0.5 P2Se5 + 0.1 AgSe5 + 1.9 Ag	-4.481537083655952e-15	-0.026254166123819478	-0.8087726763328162
AgBi3S5	1.9108725966666857	3.760118274444434	AgBi3S5 + Li -> LiBiS2 + Bi2S3 + Ag	0.4444 AgBi3S5 -> BiS2 + 0.2222 Ag2S + 0.3333 Bi	-3.052600319556712e-15	-0.08224321490740683	-0.6355105712290103
AgBiSCl2	2.5765049266666655	4.039724504895834	AgBiSCl2 + Li -> BiSCl + LiCl + Ag	2 AgBiSCl2 -> Ag2S + 1.333 BiCl3 + S + 0.6667 Bi	-0.091787655241931	-0.02436611704545366	-0.4853356574242411
AgBr	2.40317605666667	4.678453696666661	AgBr + Li -> Ag + LiBr	3 AgBr -> Ag2Br3 + Ag	-0.08222951767857167	0.0	-0.004210556666665921
AgCl	2.8060917716666705	4.505889836666664	AgCl + Li -> Ag + LiCl	3 AgCl -> Ag2Cl3 + Ag	-0.1685908723214231	0.0	-0.0528339659999989
AgH5S2O9	3.79221673541662	3.0431451201042785	4 AgH5S2O9 + 2 Li -> Ag2SO4 + Li2H4(SO4)3 + 4 H4SO5 + 2 Ag	3.2 AgH5S2O9 -> Ag2SO4 + 4 H4SO5 + 1.2 AgSO4 + 0.2 S	-0.24817916856173605	-0.08320054322299608	-0.11839381848484631
AgHg2AsO4	3.2358824500000423	4.095874264999966	1.5 AgHg2AsO4 + 1.5 Li -> Hg3AsO4 + 0.5 Li3AsO4 + 1.5 Ag	3 AgHg2AsO4 -> Hg3(AsO4)2 + Hg3AsO4 + 3 Ag	-0.43918633234375104	-0.15555795023436247	-0.11592772012498087
AgHg2NO5	3.3948300683333077	4.091261762916706	2 AgHg2NO5 + Li -> Hg2NO4 + Ag2HgO2 + LiNO3 + HgO	2 AgHg2NO5 -> Hg3(NO4)2 + AgO + HgO + Ag	-0.6714341327589262	-0.12480943489999352	-0.04815792711537403
AgHg2PO4	3.334313452500017	4.083228344999941	1.5 AgHg2PO4 + 1.5 Li -> Hg3PO4 + 0.5 Li3PO4 + 1.5 Ag	3 AgHg2PO4 -> Hg3PO4 + Hg3(PO4)2 + 3 Ag	-0.27226233451444415	-0.1256577044375382	-0.12812897337499507
AgHgAsS3	2.037669341458285	4.013037976666705	3 AgHgAsS3 + Li -> Ag3AsS3 + 3 HgS + LiAsS2 + AsS	2.5 AgHgAsS3 -> As2S3 + 0.5 Ag3AsS4 + 2.5 HgS + Ag	-8.47572763270262e-16	-0.00581433850000046	-0.607375459585089
AgHgSBr	2.563680773333336	4.329445043333329	Li + HgBr2 -> HgBr + LiBr	6 AgHgSBr -> HgS4 + 2 HgBr2 + Hg3(SBr)2 + 6 Ag	-0.03237702062500336	0.0	-0.46334238734848177
AgHgSI	1.8796156816666665	4.248229241250002	AgHgSI + Li -> LiI + HgS + Ag	2 AgHgSI -> Ag2HgSI2 + 0.25 HgS4 + 0.75 Hg	5.718278552058199e-16	0.0	-0.4664998756818166
AgI	1.90362205666667	4.780626671666664	AgI + Li -> Ag + LiI	AgI -> I + Ag	0.0	0.0	-0.1839031070330472
AgI3O8	3.754986965000005	4.784885300416667	0.5 AgI3O8 + Li -> LiIO3 + 0.3333 AgIO3 + 0.1667 AgI	0.6667 AgI3O8 -> I2O5 + 0.1667 O2 + 0.6667 Ag	-0.806813499021394	-0.1507298059249993	-0.0890759329607369
AgIO3	3.3985504174999868	4.615776769666648	2.333 AgIO3 + 2 Li -> Ag2O + 2 LiIO3 + 0.3333 AgI	12 AgIO3 -> Ag3O4 + 4 AgI3O8 + 5 Ag	-0.7716751548456018	-0.13944231542391328	-0.08679144399711447
AgMo2P3O13	3.587433421666595	4.168032891666356	AgMo2P3O13 + Li -> LiMo(PO4)2 + MoPO5 + Ag	AgMo2P3O13 -> Mo2P3O13 + Ag	-0.3118225579825715	-0.12450129169140078	-0.1654404416857833
AgMoPO6	3.553311868680564	4.641635793666627	4 AgMoPO6 + 6 Li -> MoO3 + Li3Mo3P3O17 + Li3PO4 + 4 Ag	8 AgMoPO6 -> Ag3O4 + 4 Mo2P2O11 + 5 Ag	-0.40335169890230294	-0.13207201637814792	-0.12042443273935532
AgNO3	3.5201130916666625	4.998963043541658	AgNO3 + Li -> LiNO3 + Ag	AgNO3 -> NO3 + Ag	-0.6827402765943549	-0.06992420578431058	-0.08948852944444141
AgP(OF)2	3.5569018323333523	4.397173009666623	3 AgP(OF)2 + 3 Li -> LiPF6 + 2 LiPO3 + 3 Ag	14 AgP(OF)2 -> Ag9P14(OF)28 + 5 Ag	-0.18496776946822147	-0.10476042470833002	-0.2174718956469457
AgPF6	4.0258610466667	5.066791231666721	AgPF6 + Li -> LiPF6 + Ag	2 AgPF6 -> AgF2 + 2 PF5 + Ag	-0.1945295503472264	0.0	-0.2871330423333298
AgPO3	3.7485709326666488	5.0934956383333825	AgPO3 + Li -> LiPO3 + Ag	6 AgPO3 -> Ag3(PO4)2 + 2 P2O5 + 3 Ag	-0.22555483958696954	-0.1338073132064912	-0.17575063486121323
AgTeO3	3.3239529735416617	4.622191717083322	2 AgTeO3 + 2 Li -> Li2TeO4 + TeO2 + 2 Ag	AgTeO3 -> TeO3 + Ag	-0.46424668103478917	-0.16380325902175286	-0.13551606491380008
AgW3Br7	2.3852096734523744	4.206913187500036	0.1429 AgW3Br7 + Li -> LiBr + 0.4286 W + 0.1429 Ag	4 AgW3Br7 -> WBr6 + 11 WBr2 + 4 Ag	-0.2820401173990694	0.0	-0.5289088203940655
Al(BH4)3	1.564148734294882	1.6694822108331113	Al(BH4)3 + 2.167 Li -> AlH3 + 0.1667 Li(BH)6 + 2 LiBH4	0.3333 Al(BH4)3 -> BH3 + 0.5 H2 + 0.3333 Al	-0.08371502254024721	-0.18096718898424946	-0.9797815972053501
Al(ICl2)3	3.3830237608333285	3.1883329791666672	Al(ICl2)3 + Li -> LiAlCl4 + I + 2 ICl	0.6667 Al(ICl2)3 -> ICl3 + ICl + 0.6667 Al	-0.1616388302310412	-0.1352456182812507	-0.28282342951746964
Al(IO3)3	3.586789139833343	4.212983782916663	0.4 Al(IO3)3 + Li -> LiIO3 + 0.2 Al2O3 + 0.2 I	0.6667 Al(IO3)3 -> I2O5 + 0.5 O2 + 0.6667 Al	-0.7667102738602889	-0.17654608187313237	-0.08231898403117666
Al(PO3)3	2.621345417666656	4.997324175833328	0.6 Al(PO3)3 + Li -> LiPO3 + 0.6 AlPO4 + 0.2 P	0.6667 Al(PO3)3 -> P2O5 + 0.5 O2 + 0.6667 Al	-0.04739529150113864	-0.13304578604478756	-0.13117785660714532
Al(SeCl)4	3.048367241458328	3.082566762343746	Al(SeCl)4 + Li -> LiAlCl4 + 4 Se	Al(SeCl)4 -> SeCl4 + 3 Se + Al	-0.07754746650354538	-0.12913802089322868	-0.4044971222389375
Al11TlO17	2.4050180750000747	3.7099243333332876	Al11TlO17 + Li -> LiAl5O8 + 3 Al2O3 + Tl	2 Al11TlO17 -> Tl2O3 + 10.33 Al2O3 + 1.333 Al	-0.032857053526390345	-0.29701818317010265	-0.0553277338874798
Al2(MoO4)3	3.1254543110936943	4.181650496458341	0.7143 Al2(MoO4)3 + 2.286 Li -> Li2MoO4 + 0.2857 LiAl5O8 + 1.143 MoO2	0.3333 Al2(MoO4)3 -> MoO3 + 0.5 O2 + 0.6667 Al	-0.4539074735245938	-0.1835891331338031	-0.05955710636393308
Al2(SO4)3	3.0782307969333313	3.384075490520834	5.333 Al2(SO4)3 + 25 Li -> LiS4 + 12 Li2SO4 + 5.333 Al2O3	Al2(SO4)3 -> Al2O3 + 4.5 O2 + 3 S	-0.2385117117010358	-0.127032576214281	-0.10645278211382436
Al2(SeO4)3	3.9425688249999933	4.340692395416668	0.6667 Al2(SeO4)3 + 2 Li -> Li2SeO4 + 0.6667 Al2O3 + SeO2	0.6667 Al2(SeO4)3 -> Se2O5 + 1.5 O2 + 1.333 Al	-0.6139332146490482	-0.140345498042453	-0.10881337869918362
Al2Ag2Bi2S3Cl8	2.4869468008333557	2.7606512115624873	2 Al2Ag2Bi2S3Cl8 + 3 Li -> AgBi3S5 + AlBiSCl4 + 3 LiAlCl4 + 3 Ag	Al2Ag2Bi2S3Cl8 -> AlBiCl6 + AgBiSCl2 + 0.5 Ag2S + 1.5 S + Al	-0.07374651386956721	-0.1604412836206901	-0.5493091010249782
Al2AgCl5O	2.6322881241666707	3.942251730000013	Al2AgCl5O + Li -> AlClO + LiAlCl4 + Ag	Al2AgCl5O -> AlClO + 0.8333 AlCl3 + 0.5 Ag2Cl3 + 0.1667 Al	-0.07704559149253565	-0.22079603999999908	-0.24228437065697905
Al2B3HO8	1.9706479275000253	4.186873296111102	6 Al2B3HO8 + 6 Li -> Al4B2O9 + 3 Li2Al(BO2)5 + Al5BO9 + 3 H2	Al2B3HO8 -> BHO2 + B2O3 + 1.5 O2 + 2 Al	0.0	-0.20874103050925896	-0.032099127421540974
Al2BiS4	2.034456003333328	2.2910469811110823	0.5 Al2BiS4 + Li -> LiAlS2 + 0.5 Bi	2 Al2BiS4 -> Bi2S3 + 1.667 Al2S3 + 0.6667 Al	-0.027902943563706817	-0.33610589793859336	-0.8467507354546755
Al2BiSe4	1.7618469695833303	2.1021113916666345	0.5 Al2BiSe4 + Li -> LiAlSe2 + 0.5 Bi	2 Al2BiSe4 -> Bi2Se3 + 1.667 Al2Se3 + 0.6667 Al	-0.05233969097128188	-0.289738410357661	-0.8449575766071455
Al2Cd3(GeO4)3	2.426023913333359	4.078142100972189	Al2Cd3(GeO4)3 + 2 Li -> Cd2GeO4 + 2 LiAlGeO4 + Cd	Al2Cd3(GeO4)3 -> Al2Ge2O7 + 1.5 O2 + GeO2 + 3 Cd	-0.3007136167763087	-0.20806089834820396	-0.029906212830891343
Al2CdBr8	1.753168868333337	3.4223548499999996	0.5 Al2CdBr8 + Li -> AlBr3 + LiBr + 0.5 Cd	0.1667 Al2CdBr8 -> Br + 0.1667 CdBr2 + 0.3333 Al	-0.06823253814813368	-0.1992370871739093	-0.40186193987954777
Al2CdCl8	2.2547551733333444	3.683074559999968	Al2CdCl8 + Li -> AlCdCl4 + LiAlCl4	0.3333 Al2CdCl8 -> Cl2 + 0.3333 CdCl2 + 0.6667 Al	-0.08065445711340469	-0.19512776826086897	-0.28717485298634227
Al2CdS4	1.7331592358333254	2.512512058541668	0.5 Al2CdS4 + Li -> LiAlS2 + 0.5 Cd	Al2CdS4 -> CdS2 + 2 S + 2 Al	-0.01735014534091217	-0.34075028210526104	-0.827007504390399
Al2CdSe4	1.5181701433333201	2.315093779531251	0.5 Al2CdSe4 + Li -> LiAlSe2 + 0.5 Cd	Al2CdSe4 -> CdSe2 + 2 Se + 2 Al	-0.039747479260980434	-0.2787145196051941	-0.830271147664833
Al2CdTe4	1.3003389600000022	1.7823019733333445	0.6667 Al2CdTe4 + Li -> LiAlTe2 + 0.3333 Al + 0.6667 CdTe	1.667 Al2CdTe4 -> Al2Te5 + 1.667 CdTe + 1.333 Al	-0.13083270926190416	-0.39016436990947234	-0.9776856937911964
Al2CoO4	2.2212381358333184	4.156176990833314	0.5 Al2CoO4 + Li -> LiAlO2 + 0.5 Co	Al2CoO4 -> CoO2 + 0.6667 Al2O3 + 0.6667 Al	-0.1450126675462906	-0.2710505234782654	-0.06551674086537318
Al2CuCl8	3.2353496383333438	3.6682397341666655	Al2CuCl8 + Li -> AlCuCl4 + LiAlCl4	Al2CuCl8 -> CuCl2 + 3 Cl2 + 2 Al	-0.12167429998144463	-0.19758743021739122	-0.2900710419795245
Al2FeO4	2.1690567858333187	3.120551717499916	0.5 Al2FeO4 + Li -> LiAlO2 + 0.5 Fe	3 Al2FeO4 -> Fe2O3 + 3 Al2O3 + Fe	-0.12042844212069337	-0.2937505805279481	-0.1502408942474549
Al2Ge(O2F)2	2.2851147492708526	4.2195829093749975	3 Al2Ge(O2F)2 + 8 Li -> LiAl5O8 + LiAlGeO4 + 6 LiF + 2 Ge	Al2Ge(O2F)2 -> GeO2 + 0.6667 AlF3 + O2 + 1.333 Al	-0.1276571867094045	-0.18152012196969736	-0.05229295701191283
Al2Ge2O7	2.5602523333333433	4.096767232777776	0.625 Al2Ge2O7 + Li -> LiAlGeO4 + 0.125 Al2O3 + 0.25 Ge	0.6667 Al2Ge2O7 -> O2 + 1.333 GeO2 + 1.333 Al	-0.20800070718201802	-0.21725596060343655	-0.06342558176226021
Al2H12(SeO5)3	3.0378805925391106	4.115494883958318	0.5 Al2H12(SeO5)3 + 1.2 Li -> AlHO2 + 1.2 LiHSeO3 + 1.9 H2O + 0.3 Se	1.333 Al2H12(SeO5)3 -> H10SeO8 + 1.2 AlH5(SeO4)2 + 0.2 Al2(SeO4)3 + 1.067 Al	-0.2372220651415402	-0.146419224531249	-0.10835427522321917
Al2H16S3O20	3.0240310773332624	3.398190000833357	0.7143 Al2H16S3O20 + 1.786 Li -> AlH11SO10 + 0.4286 AlHO2 + 0.07143 LiS4 + 0.8571 Li2SO4	0.7143 Al2H16S3O20 -> AlH11SO10 + 0.4286 AlHO2 + 1.714 O2 + 1.143 S	-0.12779496843564786	-0.106714157853107	-0.059477689630285546
Al2HgS4	2.248841068333325	2.5140436787500002	0.5 Al2HgS4 + Li -> LiAlS2 + 0.5 Hg	Al2HgS4 -> HgS4 + 2 Al	-0.019312531704550828	-0.34205703473684435	-0.835588596430233
Al2HgSe4	1.9424771158333214	2.3502412728385362	0.5 Al2HgSe4 + Li -> LiAlSe2 + 0.5 Hg	0.3333 Al2HgSe4 -> Se + 0.3333 HgSe + 0.6667 Al	-0.03609863399070745	-0.27989923013150975	-0.8320026476648339
Al2HgTe4	1.5204988058333249	1.7826942941666772	0.5 Al2HgTe4 + Li -> LiAlTe2 + 0.5 Hg	1.667 Al2HgTe4 -> Al2Te5 + 1.667 HgTe + 1.333 Al	-0.1305305825952381	-0.3900619220147381	-0.9775359622527411
Al2NiO4	2.7741232958333732	3.8887177075000032	2.5 Al2NiO4 + Li -> LiAl5O8 + 0.5 Ni + 2 NiO	Al2NiO4 -> Al2O3 + 0.5 O2 + Ni	-0.2591126154629686	-0.2856018332608712	-0.028901553030340477
Al2O3	1.2624114599999197	4.074959173333324	2.667 Al2O3 + Li -> LiAl5O8 + 0.3333 Al	0.6667 Al2O3 -> O2 + 1.333 Al	-8.881784197001252e-16	-0.29689769102940966	-0.03237771985293847
Al2P3H9(CO3)3	2.6191019201665373	2.7620642541666065	3 Al2P3H9(CO3)3 + Li -> LiPO3 + 6 AlPO4 + 6.75 H4C + 2.25 C + 2 P	Al2P3H9(CO3)3 -> Al(PO3)3 + 2.25 H4C + 0.75 C + Al	-0.010850655806351917	-0.12833587362979126	-0.5134581108227034
Al2Pb3F12	2.406531084583346	4.8435398016667195	0.5 Al2Pb3F12 + 3 Li -> Li3AlF6 + 1.5 Pb	0.3333 Al2Pb3F12 -> PbF3 + 0.3333 AlF3 + 0.3333 Al	-0.15239400532827885	0.0	-0.1149386221341464
Al2PbO4	2.219460649333419	3.8458536708333635	10.25 Al2PbO4 + 2.5 Li -> Al8(Pb3O7)3 + 2.5 LiAl5O8 + 1.25 Pb	Al2PbO4 -> PbO2 + 0.6667 Al2O3 + 0.6667 Al	-0.18178599361110948	-0.30818461228261507	-0.07772132466667081
Al2PbS4	1.806568215833322	2.4994976719444586	0.5 Al2PbS4 + Li -> LiAlS2 + 0.5 Pb	Al2PbS4 -> PbS2 + 0.6667 Al2S3 + 0.6667 Al	-0.038634742905405695	-0.3379836492105257	-0.8339406396434295
Al2PbSe4	1.5886321483333201	2.2663288316666788	0.5 Al2PbSe4 + Li -> LiAlSe2 + 0.5 Pb	Al2PbSe4 -> PbSe2 + 0.6667 Al2Se3 + 0.6667 Al	-0.05045804277449406	-0.279417327499935	-0.831298328434066
Al2PdCl8	3.113898408333322	3.6618058274999674	0.5 Al2PdCl8 + Li -> LiAlCl4 + 0.5 Pd	0.3333 Al2PdCl8 -> Cl2 + 0.3333 PdCl2 + 0.6667 Al	-0.16192553979590807	-0.20141241927536324	-0.2945748686859999
Al2S3	1.598005969722211	2.5099535043402783	0.6667 Al2S3 + Li -> LiAlS2 + 0.3333 Al	0.3333 Al2S3 -> S + 0.6667 Al	-0.046285173935181056	-0.3951988991176414	-0.9568522300932862
Al2Se3	1.5565238516666562	2.3141039753385426	0.6667 Al2Se3 + Li -> LiAlSe2 + 0.3333 Al	0.3333 Al2Se3 -> Se + 0.6667 Al	-0.06164903602318761	-0.325375006617572	-1.0026658326948037
Al2Si(O2F)2	1.5494184208854214	4.132054683541667	1.8 Al2Si(O2F)2 + 3.2 Li -> LiAlSiO4 + 0.4 LiAl5O8 + 0.6 Li3AlF6 + 0.8 Si	1.5 Al2Si(O2F)2 -> AlF3 + 1.5 SiO2 + 1.5 O2 + 2 Al	0.0	-0.20580549068965626	-0.05612297297279767
Al2Si2PbO8	2.2888830531250024	4.0791177402083685	0.5 Al2Si2PbO8 + Li -> LiAlSiO4 + 0.5 Pb	Al2Si2PbO8 -> PbO2 + 0.6667 Al2SiO5 + 1.333 SiO2 + 0.6667 Al	-0.08103358098610425	-0.23100618945754703	-0.06361856573411728
Al2Si3H8(NO5)2	1.5909108882737866	2.979977741250011	2.5 Al2Si3H8(NO5)2 + 7 Li -> Li2Si2O5 + 5 H3N + 5 LiAlSiO4 + 0.5 SiH8 + 0.5 H2	0.25 Al2Si3H8(NO5)2 -> H2O + 0.75 SiO2 + 0.25 N2 + 0.5 Al	0.0	-0.2001282038636285	-0.23392080959001538
Al2SiO5	1.593828758333323	4.0856844245832775	1.333 Al2SiO5 + 1.333 Li -> LiAlSiO4 + 0.3333 LiAl5O8 + 0.3333 Si	Al2SiO5 -> SiO2 + 1.5 O2 + 2 Al	0.0	-0.24914406799999966	-0.04395621038376696
Al2SnCl6O	2.0976107737499956	2.7278819487499777	0.75 Al2SnCl6O + 1.5 Li -> LiAlCl4 + 0.5 LiCl + 0.25 Al2O3 + 0.75 Sn	Al2SnCl6O -> SnCl4 + AlClO + 0.3333 AlCl3 + 0.6667 Al	-0.06926682714743881	-0.20992948352272656	-0.3464001787544957
Al2Te3	1.3523726424999905	1.7497809217708347	0.6667 Al2Te3 + Li -> LiAlTe2 + 0.3333 Al	1.667 Al2Te3 -> Al2Te5 + 1.333 Al	-0.15726847866758242	-0.4407134501929397	-1.1626290585714338
Al2Te5	1.6915925821428588	2.1086193316666657	0.5 Al2Te5 + 1.167 Li -> LiAlTe2 + 0.1667 LiTe3	0.2 Al2Te5 -> Te + 0.4 Al	-0.13515224992857044	-0.3922172504357899	-0.9898736580219718
Al2VCl8	2.042433908333321	2.063143739999997	0.5 Al2VCl8 + Li -> LiAlCl4 + 0.5 V	Al2VCl8 -> VCl3 + 1.667 AlCl3 + 0.3333 Al	-0.12372766604909868	-0.21036335919043614	-0.4364975145648149
Al2ZnO4	1.757777725833318	4.126876679999998	0.5 Al2ZnO4 + Li -> LiAlO2 + 0.5 Zn	2 Al2ZnO4 -> O2 + 2 Al2O3 + 2 Zn	-0.14470462869048362	-0.25733380804348327	-0.01871913496214983
Al2ZnS4	1.5717825433333366	2.54163534311012	0.5 Al2ZnS4 + Li -> LiAlS2 + 0.5 Zn	0.3333 Al2ZnS4 -> S + 0.3333 ZnS + 0.6667 Al	-0.02074587404219974	-0.3422668981578929	-0.848417503412702
Al2ZnSe4	1.44823092833332	2.3401554386979178	0.5 Al2ZnSe4 + Li -> LiAlSe2 + 0.5 Zn	Al2ZnSe4 -> ZnSe2 + 2 Se + 2 Al	-0.03649853991131824	-0.2813553090788783	-0.8367791102678583
Al2ZnTe4	1.323194060000001	1.7680175358333357	0.6667 Al2ZnTe4 + Li -> LiAlTe2 + 0.3333 Al + 0.6667 ZnTe	1.667 Al2ZnTe4 -> Al2Te5 + 1.667 ZnTe + 1.333 Al	-0.13358366126190546	-0.39213730780420764	-0.9877427203571401
Al3BC3	0.9586935537777741	1.4363610489814767	20 Al3BC3 + 15 Li -> LiB6C + 15 Al4C3 + 14 LiBC	0.3636 Al3BC3 -> C + 0.09091 B4C + 1.091 Al	-0.33360865278508944	-0.731119355973396	-1.369752533536961
Al3Si3Ag4IO12	3.3800580183334006	3.885182200000003	0.3333 Al3Si3Ag4IO12 + Li -> LiAlSiO4 + 0.3333 AgI + Ag	Al3Si3Ag4IO12 -> AgIO3 + Ag2O + AlAgO2 + 3 SiO2 + 2 Al	-0.1440221421273904	-0.20352494511298724	-0.1023175782394321
Al3Tl4Fe(As2O7)4	3.236972814404713	4.080346991249998	Al3Tl4Fe(As2O7)4 + 4.2 Li -> LiFeAsO4 + 3 AlAsO4 + 1.333 Tl3AsO4 + 1.067 Li3AsO4 + 0.8 As2O3	0.25 Al3Tl4Fe(As2O7)4 -> TlAsO4 + 0.3333 As2O5 + 0.25 FeAsO4 + 0.08333 AlAsO4 + 0.6667 Al	-0.3511974231078092	-0.18791834612375657	-0.1225443140518383
Al4(B2O5)3	2.038190475989616	4.145831805833323	3.031 Al4(B2O5)3 + 3 Li -> Li3B11O18 + 3.031 Al4B2O9 + 0.1875 B6O	0.3333 Al4(B2O5)3 -> O2 + B2O3 + 1.333 Al	-0.0017241566297228061	-0.2231509027556835	-0.04622306906531293
Al4Bi2O9	2.298514704583338	4.155552208333318	3 Al4Bi2O9 + 12 Li -> Bi2O3 + 12 LiAlO2 + 4 Bi	0.5 Al4Bi2O9 -> BiO2 + 0.8333 Al2O3 + 0.3333 Al	-0.1966152237797596	-0.2933008449509784	-0.03661159290322846
Al4C3	0.20464807333333468	1.4317145433333334	0.3333 Al4C3 + 2 Li -> C + 0.6667 Li3Al2	0.3333 Al4C3 -> C + 1.333 Al	-0.3552114561184223	-0.7901846799999968	-1.4422663869642824
Al4CO4	0.7606217624999625	1.5062512783333315	3 Al4CO4 + 6 Li -> Al4C3 + 6 LiAlO2 + 2 Al	0.75 Al4CO4 -> Al2O3 + 0.75 C + Al	-0.16907882679499409	-0.46291644285714906	-0.724478276197476
Al4CdO7	2.5361998333333493	3.9309952574999922	1.25 Al4CdO7 + Li -> LiAl5O8 + 0.5 Cd + 0.75 CdO	2 Al4CdO7 -> O2 + 4 Al2O3 + 2 Cd	-0.1511504198662399	-0.2927833786875107	-0.028100535924000525
Al4Fe2Si5O18	2.9004897795833386	3.2928949395833547	0.3333 Al4Fe2Si5O18 + 1.333 Li + 0.6667 Fe2O3 + 4.667 SiO2 -> Fe2SiO4 + 1.333 LiAl(Si2O5)2	Al4Fe2Si5O18 -> Fe2O3 + 1.667 Al2SiO5 + 3.333 SiO2 + 0.6667 Al	-0.07824302977646447	-0.2236654572899175	-0.09375757731481116
Al5BO9	1.3474922285907196	4.110345991111109	1.023 Al5BO9 + 1.225 Li -> LiAl5O8 + 0.1126 Li2Al(BO2)5 + 0.07658 B6O	2 Al5BO9 -> Al4B2O9 + 4.5 O2 + 6 Al	0.0	-0.2700216352592628	-0.026596881802333883
Al5CuS8	1.8262504677777613	2.3866292988889	0.5 Al5CuS8 + Li -> LiAlS2 + 0.1667 AlCu3 + 0.6667 Al2S3	Al5CuS8 -> CuS2 + 2 Al2S3 + Al	-0.034669211418927315	-0.36979712376420326	-0.9016097627962312
Al6B5(O5F)3	1.6562010655833497	4.182569059388892	1.663 Al6B5(O5F)3 + 4.494 Li -> Li2Al(BO2)5 + 1.629 Al5BO9 + 0.2809 B6O + 0.8315 Li3AlF6	Al6B5(O5F)3 -> AlF3 + 2.5 B2O3 + 3.75 O2 + 5 Al	0.0	-0.21575844055557258	-0.044183869076698024
Al6Cd4SO12	2.2040389025000215	3.0470056570833313	0.1667 Al6Cd4SO12 + Li -> LiAlO2 + 0.1667 CdS + 0.5 Cd	1.333 Al6Cd4SO12 -> CdSO4 + 0.3333 CdS + 4 Al2O3 + 4 Cd	-0.18996285267242197	-0.2723298338028193	-0.21885603807999043
Al6Cd4TeO12	2.1775457458333514	3.174494028124994	0.1667 Al6Cd4TeO12 + Li -> LiAlO2 + 0.1667 CdTe + 0.5 Cd	Al6Cd4TeO12 -> CdTeO3 + 3 Al2O3 + 3 Cd	-0.18427854405171917	-0.2700822192957646	-0.18156880376000206
Al6SnTe10	1.3389593549999932	1.784074085370369	0.2 Al6SnTe10 + Li -> LiAlTe2 + 0.2 Sn + 0.2 Al	0.5556 Al6SnTe10 -> Al2Te5 + 0.5556 SnTe + 1.333 Al	-0.14357463146632	-0.423626048173084	-1.097351112489379
Al7(TlS4)3	1.490381050833312	2.407780158333337	0.1667 Al7(TlS4)3 + Li -> LiAlS2 + 0.5 Tl + 0.1667 Al	0.6667 Al7(TlS4)3 -> Tl2S5 + Al2S3 + 2.667 Al	-0.02384348819672466	-0.3392325389062516	-0.8556595516918231
Al7Cr(Bi2O9)2	2.3127442620832257	3.808213595000162	0.5714 Al7Cr(Bi2O9)2 + 0.5714 Li -> Al4Bi2O9 + 0.04762 Bi2O3 + 0.5714 LiCrO2 + 0.1905 Bi	10 Al7Cr(Bi2O9)2 -> Cr2(Bi2O5)3 + 17 Al4Bi2O9 + 4 Cr2O3 + 2 Al	-1.0772878553260865	-0.288305219534299	-0.947300302206413
Al8(Pb3O7)3	2.1924739505599016	3.6302569756666667	0.125 Al8(Pb3O7)3 + Li -> LiAlO2 + 0.5 Pb + 0.625 PbO	0.5333 Al8(Pb3O7)3 -> Pb3O4 + 1.8 Al2PbO4 + 0.6667 Al	-0.27256249610491246	-0.32279097077868757	-0.10207196362499849
AlAg(PSe3)2	1.8765811572916675	2.313710398734569	2 AlAg(PSe3)2 + 4.8 Li -> Ag2PSe3 + 0.4 Li7PSe6 + 2 LiAlSe2 + 2.6 PSe	3.375 AlAg(PSe3)2 -> Ag3PSe4 + 2.875 P2Se5 + 0.375 AgSe5 + 3.375 Al	-1.839691846861058e-15	-0.1475145847411703	-0.9415032367676217
AlAgO2	3.1016418641666763	4.0067189533333485	AlAgO2 + Li -> LiAlO2 + Ag	3 AlAgO2 -> Al2O3 + 3 AgO + Al	-0.2532008297500017	-0.2375259699324328	-0.048587124062492215
AlAgS2	2.0901868291666723	2.611870709895838	AlAgS2 + Li -> LiAlS2 + Ag	0.6667 AlAgS2 -> S + 0.3333 Ag2S + 0.6667 Al	-0.010631143374998597	-0.3037257200000003	-0.7818191416161622
AlAgSe2	1.8798494016666334	2.2381968698611137	AlAgSe2 + Li -> LiAlSe2 + Ag	3.25 AlAgSe2 -> AgSe5 + 0.25 Al(Ag3Se2)3 + 3 Al	-0.02572405912500164	-0.24896874587493656	-0.7483802831887725
AlAgSnSe4	2.001796678333348	2.222494025277772	AlAgSnSe4 + Li -> AgSnSe2 + LiAlSe2	3 AlAgSnSe4 -> Ag2SnSe3 + 2 SnSe2 + AgSe5 + 3 Al	-0.01737706789522031	-0.19933156086533543	-0.6542488731249909
AlAgTe2	1.4164177266666558	1.8432565885416672	AlAgTe2 + Li -> LiAlTe2 + Ag	2 AlAgTe2 -> AgTe3 + AgTe + 2 Al	-0.1010818185227278	-0.3528321482890002	-0.8848683069387739
AlAs	0.6257413766666688	1.7014281083333316	AlAs + 3 Li -> Li3As + Al	AlAs -> As + Al	-0.18486107667016727	-0.48650763864250046	-1.312576054770404
AlAs3(SeCl)4	2.613321306666662	2.8598768186718666	AlAs3(SeCl)4 + Li -> LiAlCl4 + 1.333 As2Se3 + 0.3333 As	1.2 AlAs3(SeCl)4 -> As2Se3 + 1.6 AsCl3 + 1.8 Se + 1.2 Al	-0.05566890182712747	-0.11307747037038185	-0.5039148195323062
AlAs3S5Cl4	2.608307239583368	2.97371819243055	AlAs3S5Cl4 + Li -> AsS2 + LiAlCl4 + As2S3	0.6 AlAs3S5Cl4 -> AsS2 + 0.8 AsCl3 + S + 0.6 Al	-0.04448661008802679	-0.10437896123026436	-0.631224276496926
AlAsO4	3.020499588958348	4.288524382083334	5 AlAsO4 + 6.4 Li -> LiAl5O8 + 1.8 Li3AsO4 + 1.6 As2O3	2 AlAsO4 -> As2O5 + 1.5 O2 + 2 Al	-0.2898007764110826	-0.17651795983334306	-0.07076961937056625
AlBP2H5NO9	2.491018581666708	3.169767749999888	2 AlBP2H5NO9 + 0.1667 Li -> PH9(NO2)2 + 0.1944 B(HO)3 + 0.02778 Al2P3(HO3)3 + 0.1667 LiB5H2O9 + 0.9722 BPO4 + 1.944 AlPO4	2.25 AlBP2H5NO9 -> PH9(NO2)2 + 0.75 B(HO)3 + 1.5 BPO4 + 2 AlPO4 + 0.125 N2 + 0.25 Al	-0.006011133246391687	-0.1389756574295804	-0.212095453948987
AlBPbO4	2.1295237064583126	3.9163413634454693	AlBPbO4 + 2 Li -> Li2AlBO4 + Pb	7.364 AlBPbO4 -> Al5BO9 + 3.545 PbO2 + 0.6364 B10(Pb2O7)3 + 2.364 Al	-0.16503754548610683	-0.2594284841421546	-0.06756881608332188
AlBiCl6	2.3900413366666555	3.7481794050000006	AlBiCl6 + 3 Li -> LiAlCl4 + 2 LiCl + Bi	0.6667 AlBiCl6 -> Cl2 + 0.6667 BiCl3 + 0.6667 Al	-0.09258256937498399	-0.14590736589285758	-0.2364461963907072
AlBiSCl4	2.34542057083334	2.7075518035416684	3 AlBiSCl4 + 3 Li -> Bi2S3 + 3 LiAlCl4 + Bi	1.5 AlBiSCl4 -> AlBiCl6 + 0.5 BiS2 + 0.5 S + 0.5 Al	-0.07195593335526596	-0.1844305323076889	-0.5599658222108945
AlBiSeCl4	3.124663855833327	2.714047968833319	Li + 2 Al(SeCl2)2 -> Al(SeCl)4 + LiAlCl4	16 AlBiSeCl4 -> Al(SeCl)4 + 10 AlBiCl6 + 6 BiSe2 + 5 Al	-0.07135709844338867	-0.16449820788462022	-0.4316324382461296
AlBiTeCl4	2.396099188333345	2.5224349809166546	6 AlBiTeCl4 + 6 Li -> Bi4Te3 + 6 LiAlCl4 + Bi2Te3	2.333 AlBiTeCl4 -> AlBiCl6 + 1.333 BiTeCl + 0.5 Al(TeCl2)2 + 0.8333 Al	-0.07206641896223975	-0.17396629769230998	-0.47509897567574644
AlBr3	1.6477220191666664	3.4020806916666655	AlBr3 + 3 Li -> Al + 3 LiBr	0.3333 AlBr3 -> Br + 0.3333 Al	-0.08184191291666854	-0.2350092282500018	-0.49916468838231043
AlC3(NCl2)3	3.5872783060416977	3.1327515248611273	4 AlC3(NCl2)3 + 4 Li -> C6N7Cl3 + 5 CNCl + 4 LiAlCl4 + C	0.5 AlC3(NCl2)3 -> CNCl + 0.5 CCl4 + 0.25 N2 + 0.5 Al	-0.19224307175284983	-0.14121020259659178	-0.5686058148423543
AlCl3	1.8512806433333229	3.654082414999998	1.333 AlCl3 + Li -> LiAlCl4 + 0.3333 Al	0.6667 AlCl3 -> Cl2 + 0.6667 Al	-0.08311432145832232	-0.23245625750000065	-0.3490323755040279
AlClO	1.7570044299999767	3.9842882842500003	4 AlClO + Li -> LiAlCl4 + 1.333 Al2O3 + 0.3333 Al	6 AlClO -> AlCl3 + 3 ClO2 + 5 Al	-0.05450968808823786	-0.2976642927777826	-0.21841712146738912
AlCrFeO4	7.558517621458495	3.1386732399999713	2.182 AlCrFeO4 + 0.7273 Li -> Cr2FeO4 + 1.091 Al2O3 + 0.1818 Li4CrFe3O8 + 0.6364 Fe	2 AlCrFeO4 -> Cr2FeO4 + 0.3333 Fe2O3 + Al2O3 + 0.3333 Fe	-1.4649428212499966	-0.25913309567629694	-1.9553904795238113
AlCuBr4	2.4627012558333368	2.6197289716666767	AlCuBr4 + Li -> AlBr3 + LiBr + Cu	AlCuBr4 -> CuBr2 + 0.6667 AlBr3 + 0.3333 Al	-0.09974003140000076	-0.18157301041666796	-0.4148583049431598
AlCuCl4	2.8742316133333197	2.818698271666675	AlCuCl4 + Li -> LiAlCl4 + Cu	3 AlCuCl4 -> Al2CuCl8 + 2 CuCl2 + Al	-0.1259712033653848	-0.1752083458333289	-0.33525672143171636
AlCuO2	2.6625142258333336	3.450509468333344	AlCuO2 + Li -> LiAlO2 + Cu	3 AlCuO2 -> Al2O3 + 3 CuO + Al	-0.19010165625000308	-0.23915336271737697	-0.12868690526316318
AlCuS2	1.8840199758333096	2.3592590983333332	AlCuS2 + Li -> LiAlS2 + Cu	AlCuS2 -> CuS2 + Al	-0.015245729125003216	-0.29607787006249797	-0.7634305849494938
AlCuSe2	2.0272313216666618	2.128778701666665	AlCuSe2 + Li + 2 CuSe -> LiAlSe2 + Cu3Se2	AlCuSe2 -> CuSe2 + Al	-0.03568761337499504	-0.26201127741400043	-0.762754049251702
AlCuTe2	1.4986996783333209	1.8065014400000041	AlCuTe2 + Li -> LiAlTe2 + Cu	5 AlCuTe2 -> Al2Te5 + 5 CuTe + 3 Al	-0.1223702781250009	-0.3641350744140004	-0.8942816453061249
AlF3	1.2877884716666776	6.225493004166664	2 AlF3 + 3 Li -> Li3AlF6 + Al	0.6667 AlF3 -> F2 + 0.6667 Al	0.0	0.0	-0.08189192808492951
AlFePO5	2.325169907395791	3.2565571337499826	2.667 AlFePO5 + 5.333 Li -> AlPO4 + 1.667 Li3PO4 + 0.3333 LiAl5O8 + 2.667 Fe	AlFePO5 -> AlPO4 + 0.3333 Fe2O3 + 0.3333 Fe	-0.09888542500781394	-0.18291110487499873	-0.12693860598957762
AlH10N2OF5	2.0943565166666387	3.5936310024999947	0.5 AlH10N2OF5 + 0.75 Li -> H4NF + 0.25 Li3AlF6 + 0.25 AlHO2 + 0.375 H2	AlH10N2OF5 -> H5NF2 + 0.5 AlH4NF4 + H3OF + 0.25 N2 + 0.5 Al	-0.009166283859139313	-0.08258689922726781	-0.26262801599605545
AlH10SO9F	2.866286997039989	3.4402235504513876	1.2 AlH10SO9F + 2.344 Li -> AlHO2 + 0.2 Li3AlF6 + 0.09375 LiS4 + 5.5 H2O + 0.825 Li2SO4	1.5 AlH10SO9F -> AlHO2 + 7 H2O + 0.5 AlF3 + 2.25 O2 + 1.5 S	-0.09335506937691074	-0.10232487511627752	-0.04762460793749357
AlH11SO10	2.933636659333331	3.421730213854136	0.2 AlH11SO10 + 0.3125 Li -> H2O + 0.2 AlHO2 + 0.0125 LiS4 + 0.15 Li2SO4	0.2 AlH11SO10 -> H2O + 0.2 AlHO2 + 0.3 O2 + 0.2 S	-0.09179064523323799	-0.11486890668182381	-0.04141688185714232
AlH12(ClO2)3	2.124003212500018	4.341225020250015	2 AlH12(ClO2)3 + 6 Li -> LiAl2H6ClO6 + 6 H2O + 5 LiCl + 3 H2	0.8333 AlH12(ClO2)3 -> H7ClO3 + H3ClO + 0.5 ClO2 + 0.8333 Al	-0.04398071959558392	-0.10104592967105197	-0.08133145322499669
AlH12(NO5)3	3.5285084918333705	4.272231145416667	0.4 AlH12(NO5)3 + Li -> LiNO3 + 0.4 AlHO2 + 2.2 H2O + 0.1 N2	0.3333 AlH12(NO5)3 -> H3NO4 + 0.5 H2O + 0.25 O2 + 0.3333 Al	-0.41069685467394557	-0.09929063791910897	-0.037000069846937045
AlH14SeNO14	3.7880077379164803	4.3228834612500044	6 AlH14SeNO14 + 6 Li -> Al2H12(SeO5)3 + 2 AlH12(NO5)3 + 2 AlHO2 + 3 Li2SeO4 + 23 H2O	AlH14SeNO14 -> H10SeO8 + H3NO4 + 0.5 H2O + 0.75 O2 + Al	-0.30376380698498817	-0.10879983274501148	-0.041345556496599656
AlH15(OF)6	2.583186081666648	4.4834426916666095	0.1667 AlH15(OF)6 + 0.5 Li -> H2O + 0.1667 Li3AlF6 + 0.25 H2	0.2 AlH15(OF)6 -> H3OF + 0.06667 AlF3 + 0.1 O2 + 0.1333 Al	-0.061620969502911294	-0.07819116064284248	-0.07074311930288335
AlH15Br3N5	0.9782316658333441	2.5586237983333118	0.25 AlH15Br3N5 + 1.5 Li -> H3N + 0.75 LiH + 0.75 LiBr + 0.25 AlN	0.3333 AlH15Br3N5 -> H4BrN + 0.3333 H3N + 0.1667 N2 + 0.3333 Al	-8.881784197001252e-16	-0.1773926843750142	-0.31243111019378444
AlH15N5Cl3	1.0763022433333518	2.647530908333287	0.25 AlH15N5Cl3 + 0.75 Li -> H3N + 0.75 LiCl + 0.25 AlN + 0.375 H2	AlH15N5Cl3 -> H3N + 3 H4NCl + 0.5 N2 + Al	0.0	-0.16966964965279008	-0.3174108220581924
AlH18C3(N3F2)3	2.3088976982291634	2.8761542608331085	2.125 AlH18C3(N3F2)3 + 1.5 Li -> H9C6N11 + 0.5 Li3AlF6 + 1.625 AlH6N2F3 + 4.875 H4NF + 0.375 C	1.333 AlH18C3(N3F2)3 -> AlH4NF4 + 1.333 H3C3N5 + 4 H4NF + 0.1667 N2 + 0.3333 Al	-0.012957152973648967	-0.1137013864740406	-0.35791977883579307
AlH2PbO2F3	2.2933939966666665	4.194213572916631	1.5 AlH2PbO2F3 + 3 Li -> AlHO2 + H2O + 0.5 Li3AlF6 + 1.5 LiF + 1.5 Pb	6 AlH2PbO2F3 -> Al2Pb3F12 + 3 PbO2 + 6 H2O + 2 AlF3 + 2 Al	-0.12054893881411388	-0.14317105308822997	-0.0796828041071449
AlH3	0.8782551500000095	1.3639329116666667	2 AlH3 + 3 Li -> Li3AlH6 + Al	0.6667 AlH3 -> H2 + 0.6667 Al	-0.19778471482922133	-0.4387472615779988	-1.1116756636785692
AlH3NCl3	2.797346490000045	3.0744828349999844	AlH3NCl3 + 0.75 Li + 0.75 H4NCl + 0.125 N2 -> AlH6N2Cl3 + 0.75 LiCl	1.333 AlH3NCl3 -> H4NCl + AlCl3 + 0.1667 N2 + 0.3333 Al	-0.02203545439238841	-0.1763498978571416	-0.35901783634133055
AlH4NF4	1.9176376183333566	3.678525940277791	3 AlH4NF4 + 3 Li -> Li3AlF6 + 1.5 AlH6N2F3 + 0.5 AlF3 + 1.5 H2	1.75 AlH4NF4 -> H7NF4 + AlF3 + 0.375 N2 + 0.75 Al	-1.7763568394002505e-15	-0.07093410156253066	-0.26314792726744063
AlH5(SeO4)2	3.1862423458725027	4.130610689166656	3.167 AlH5(SeO4)2 + 2.667 Li -> Al2H12(SeO5)3 + 1.167 AlHO2 + 2.667 LiHSeO3 + 0.6667 Se	2 AlH5(SeO4)2 -> H10SeO8 + 0.3333 Al2(SeO4)3 + 2 SeO2 + 1.333 Al	-0.2951536690618788	-0.14763811916666514	-0.13040582333333495
AlH6N2Cl3	1.7212928927778002	2.586555961249972	4 AlH6N2Cl3 + 9 Li -> AlH15N5Cl3 + 9 LiCl + 3 AlN + 4.5 H2	1.5 AlH6N2Cl3 -> AlH3NCl3 + 1.5 H4NCl + 0.25 N2 + 0.5 Al	-0.007450958497051463	-0.17220896687499865	-0.3349368495284595
AlH7C2SCl4	2.666218785297609	2.8504831760118856	AlH7C2SCl4 + Li -> LiAlCl4 + 1.75 H4C + 0.07143 CS14 + 0.1786 C	1.333 AlH7C2SCl4 -> H4C + 0.09524 CS14 + 5.333 HCl + 1.571 C + 1.333 Al	-0.044284821931818374	-0.08657010168367485	-0.598251644060604
AlHO2	1.7472697858333524	4.106772418750005	AlHO2 + Li -> LiAlO2 + 0.5 H2	1.333 AlHO2 -> O2 + 0.6667 H2O + 1.333 Al	-0.010436740000004718	-0.2437439354999995	-0.01955818102945872
AlI3	1.5710298075000004	2.651618920833333	AlI3 + 3 Li -> Al + 3 LiI	0.3333 AlI3 -> I + 0.3333 Al	-0.06268810937500524	-0.256293041875	-0.6542713034693854
AlInBr4	1.5992719077083315	2.0291991366666706	0.25 AlInBr4 + Li -> LiBr + 0.25 In + 0.25 Al	AlInBr4 -> InBr3 + 0.3333 AlBr3 + 0.6667 Al	-0.08104176061574064	-0.22746780814666678	-0.5317067528906247
AlInCl4	1.830119038333323	2.379279372500006	AlInCl4 + Li -> LiAlCl4 + In	AlInCl4 -> InCl2 + 0.6667 AlCl3 + 0.3333 Al	-0.09109610764415454	-0.1809231481358331	-0.4873903412187506
AlInI4	1.5079765177083333	1.8487634170833318	0.25 AlInI4 + Li -> LiI + 0.25 In + 0.25 Al	AlInI4 -> InI3 + 0.3333 AlI3 + 0.6667 Al	-0.08948394533068793	-0.2631207357508327	-0.5933316588541659
AlInS3	2.019709948333327	2.546291040104166	AlInS3 + Li -> LiAlS2 + InS	2 AlInS3 -> In2S3 + 3 S + 2 Al	-0.026320502175930738	-0.2963925184280307	-0.795600928847735
AlInSe3	2.420477142005198	2.338420528116323	AlInSe3 + 2 Li + Se -> LiInSe2 + LiAlSe2	2 AlInSe3 -> In2Se3 + 3 Se + 2 Al	-0.047906247342303754	-0.24470337291660704	-0.7369991829220754
AlMoP2O9	3.227966067083262	4.192189264583136	4 AlMoP2O9 + 4 Li -> LiMo2(PO4)3 + 4 AlPO4 + 2 MoO2 + Li3PO4	2 AlMoP2O9 -> Mo2P2O11 + 0.3333 Al(PO3)3 + AlPO4 + 0.6667 Al	-0.22236028447205403	-0.1329312869312118	-0.11095922578389494
AlN	0.0	2.3355980033333297	Li -> Li	2 AlN -> N2 + 2 Al	-0.030780760625002124	-0.5289889124999994	-0.7788585240885699
AlNi2BO5	2.4274631070833297	3.995374124791603	AlNi2BO5 + 2 Li -> Li2AlBO4 + NiO + Ni	21 AlNi2BO5 -> Al5BO9 + 4 Al4B2O9 + 12 Ni3BO5 + 6 Ni	-0.34324510996795166	-0.23635616676666915	-0.021006740384693856
AlNiAg2F7	4.005656203333341	4.470809900000015	3 AlNiAg2F7 + 3 Li -> Li3AlF6 + 3 NiF2 + 3 Ag2F + 2 AlF3	0.5 AlNiAg2F7 -> AgF2 + 0.5 AlF3 + 0.5 Ni	-0.3000149182084697	-3.1588719394782762e-15	-0.13738539315067477
AlP	0.5222442700000023	1.7845142344444456	AlP + 3 Li -> Li3P + Al	AlP -> P + Al	-0.1481855842331936	-0.45620502024964105	-1.410371136566492
AlP2H12N3O8	1.8296119527591284	2.8499188508332547	3 AlP2H12N3O8 + 6.343 Li -> P3H30N7O12 + 0.4571 H3N + 0.6 LiAl5O8 + 0.1714 Li2P7(H3N)9 + 1.8 Li3PO4	2.5 AlP2H12N3O8 -> P3H30N7O12 + 2 AlPO4 + 0.25 N2 + 0.5 Al	-4.093637828396822e-15	-0.13284016728259873	-0.2711359013719463
AlP2I9	2.346875357499993	2.3213598441665444	AlP2I9 + Li -> AlPI8 + LiI + P	1.2 AlP2I9 -> AlPI8 + 1.4 PI2 + 0.2 Al	-0.05086563760236584	-0.135556442777778	-0.7824599785333237
AlPH8(CCl2)2	2.2243222412500088	2.762179587083342	AlPH8(CCl2)2 + Li -> LiAlCl4 + 2 H4C + P	0.5714 AlPH8(CCl2)2 -> H4C + 0.5714 PCl3 + 0.5714 HCl + 0.1429 C + 0.5714 Al	-0.04009186724609126	-0.08134959160714406	-0.6567796228394911
AlPI8	2.3207834636666687	3.068326500833331	AlPI8 + 5 Li -> AlI3 + 5 LiI + P	AlPI8 -> PI3 + 5 I + Al	-0.04333604343084896	-0.1474490553125023	-0.6640607410813479
AlPO4	1.9409681701666779	4.424984809583344	1.667 AlPO4 + 3.333 Li -> Li3PO4 + 0.3333 LiAl5O8 + 0.6667 P	3 AlPO4 -> Al(PO3)3 + 1.5 O2 + 2 Al	0.0	-0.14721392316666382	-0.06057384229544649
AlPS4	2.262878262083337	2.4329018711111123	2 AlPS4 + 2 Li -> LiAlS2 + LiAl(PS3)2	2 AlPS4 -> P2S7 + 0.3333 Al2S3 + 1.333 Al	-2.360505813777299e-15	-0.2515122685416653	-0.9562177773561245
AlSCl3O2	3.4981227275521114	2.4127248261978744	3 AlSCl3O2 + 2 Li -> SCl + 0.5 Al2(SO4)3 + 2 LiAlCl4 + 0.5 S	4 AlSCl3O2 -> AlSCl7 + 0.6667 Al2(SO4)3 + 1.667 AlCl3 + S	-0.2409897502217615	-0.19205514250002764	-0.44109070668452155
AlSCl7	3.410990473333341	2.96978259203125	AlSCl7 + 3 Li -> LiAlCl4 + 2 LiCl + SCl	AlSCl7 -> AlCl3 + 2 Cl2 + S	-0.18118725405010494	-0.12080185177083225	-0.4903690286596347
AlSiH9C3Cl2O	2.17319388008318	1.9282725887499885	7 AlSiH9C3Cl2O + 3 Li -> Al2SiO5 + 15.75 H4C + 3 LiAlCl4 + 5.25 SiC + 2 AlClO + 0.75 Si	2 AlSiH9C3Cl2O -> SiCl4 + SiO2 + 4.5 H4C + 1.5 C + 2 Al	-0.06129968953203235	-0.21137631480603325	-0.6574023366944539
AlSiTe3	1.5429685116666647	1.9425464094444442	AlSiTe3 + 3 Li -> LiAlTe2 + Li2Te + Si	5 AlSiTe3 -> Al2Te5 + 5 SiTe2 + 3 Al	-0.11663187578947531	-0.38246392290697795	-1.2236446004861177
AlTeCl7	2.9614224749404983	3.705295787916673	1.143 AlTeCl7 + Li -> LiAlCl4 + 0.1429 Al(TeCl2)2 + 0.8571 TeCl4	0.6667 AlTeCl7 -> Cl2 + 0.6667 TeCl4 + 0.6667 Al	-0.11803673401658998	-0.14513273458333198	-0.277855859443648
AlTl(MoO4)2	3.001675349375004	4.042341668020838	1.429 AlTl(MoO4)2 + 2.286 Li -> Li2MoO4 + 0.7143 Tl2MoO4 + 0.2857 LiAl5O8 + 1.143 MoO2	6 AlTl(MoO4)2 -> Al2(MoO4)3 + 9 MoO3 + 3 Tl2O3 + 4 Al	-0.43214730380000077	-0.17819232416666209	-0.08317659042499326
AlTl2F5	2.3056968300000045	4.4569735191666595	2 AlTl2F5 + 3 Li -> AlTlF4 + Li3AlF6 + 3 Tl	0.6667 AlTl2F5 -> TlF3 + 0.3333 TlF + 0.6667 Al	-0.13666039945832997	0.0	-0.15307819446614745
AlTlBr4	1.5060914800000005	3.0920797629166783	0.3333 AlTlBr4 + Li -> LiBr + 0.3333 Al + 0.3333 TlBr	AlTlBr4 -> TlBr2 + 0.6667 AlBr3 + 0.3333 Al	-0.039790948392865344	-0.1603946254166655	-0.36031573775568715
AlTlCl4	1.5169274674999982	3.327934037500007	0.25 AlTlCl4 + Li -> LiCl + 0.25 Tl + 0.25 Al	AlTlCl4 -> TlCl3 + 0.3333 AlCl3 + 0.6667 Al	-0.04453475784999528	-0.1509225216666621	-0.27520625812500077
AlTlF4	2.2286433300000037	4.447830050416666	1.5 AlTlF4 + 1.5 Li -> AlF3 + 0.5 Li3AlF6 + 1.5 Tl	AlTlF4 -> TlF3 + 0.3333 AlF3 + 0.6667 Al	-0.09968886487179907	0.0	-0.1389836024107165
AlTlI4	1.4796747216666666	2.4053781345833367	0.3333 AlTlI4 + Li -> LiI + 0.3333 Al + 0.3333 TlI	AlTlI4 -> TlI3 + 0.3333 AlI3 + 0.6667 Al	-0.034145828035716086	-0.19040125656250018	-0.47863865496030633
AlTlS2	2.0816231672222187	2.3964258482407432	1.6 AlTlS2 + 1.6 Li + 0.2 Tl2S5 -> Tl2S + 1.6 LiAlS2	2.667 AlTlS2 -> Tl2S5 + 0.3333 Tl2S + 2.667 Al	-0.029581858374999825	-0.29455752062500107	-0.7733606362839058
AlTlSe2	1.3361171412499873	2.2783602422916704	AlTlSe2 + Li -> LiAlSe2 + Tl	2 AlTlSe2 -> Tl2Se3 + 0.3333 Al2Se3 + 1.333 Al	-0.03838307112499617	-0.23911816842962574	-0.7315869810204014
AlTlSi3O8	3.077649188333356	3.9009178502082675	4.5 AlTlSi3O8 + 8 Li + 2 Tl2O3 -> Tl4Si5O12 + 4.5 AlTlSiO4 + 4 Li2SiO3	2 AlTlSi3O8 -> Tl2O3 + 0.3333 Al2SiO5 + 5.667 SiO2 + 1.333 Al	-0.04149377230498086	-0.205492816792455	-0.06844341748016625
AlTlSiO4	2.1590333499999934	3.7869288333333366	AlTlSiO4 + Li -> LiAlSiO4 + Tl	3 AlTlSiO4 -> AlTlSi3O8 + Tl2O3 + 0.3333 Al2O3 + 1.333 Al	-0.08219252741378913	-0.2387163423484977	-0.09075763197222209
AlVMoO7	3.4796471375001943	4.183208882916659	3 AlVMoO7 + Li -> LiV2O5 + AlVO4 + Al2(MoO4)3	AlVMoO7 -> MoO3 + 0.5 V2O5 + 0.75 O2 + Al	-0.4269051489285731	-0.1792534666250023	-0.06651462539154362
AlVO4	3.251266407222154	4.142617045555557	2.5 AlVO4 + 1.5 Li -> LiV2O5 + 0.5 VO2 + 0.5 LiAl5O8	2 AlVO4 -> V2O5 + 1.5 O2 + 2 Al	-0.3198512139962144	-0.20312835972222487	-0.057784130866404215
AlWO4	2.4574565299999165	3.023549008333341	5 AlWO4 + 3 Li -> Li2WO4 + LiAl5O8 + 4 WO2	AlWO4 -> WO3 + 0.3333 Al2O3 + 0.3333 Al	-0.3702318567072762	-0.21048289770832485	-0.16926447059999905
AlZnCrS4	1.739217656309521	2.54934940413691	3 AlZnCrS4 + 3 Li -> Zn(CrS2)2 + 3 LiAlS2 + 2 ZnS + Cr	AlZnCrS4 -> CrS2 + ZnS + S + Al	-0.01267803413689883	-0.24911222346153927	-1.987731900612248
As(S8I)3	2.0293550324637715	2.039351429722214	As(S8I)3 + 46 Li -> Li6AsS5I + 19 Li2S + 2 LiI	1.105 Li6AsS5I -> Li3AsS3 + 0.1053 As(S8I)3 + 0.7895 LiI + 2.842 Li	-3.968753810035253e-15	0.0	-0.6828851237479794
As2(SO4)3	4.0100525170833485	3.4105924943229144	As2(SO4)3 + 0.6667 Li -> As2S2O9 + 0.3333 Li2S2O7 + 0.3333 SO2	0.4286 As2(SO4)3 -> SO3 + 0.4286 As2O5 + 0.2857 S	-0.3485522640869476	-0.13214448649999877	-0.30304686310606765
As2HPbF13	4.33934509520838	6.5644445662497395	As2HPbF13 + 0.6667 Li -> AsPbF7 + 0.6667 LiAsF6 + HF + 0.3333 AsF3	2 As2HPbF13 -> PbF4 + 4 AsF5 + 2 HF + Pb	-0.28002125456897975	-6.98891565976232e-15	-0.2269874286958684
As2O3	2.434236065000002	3.956047303333341	1.333 As2O3 + 3 Li -> Li3AsO4 + 1.667 As	Li3AsO4 -> LiAsO3 + 0.5 O2 + 2 Li	-0.3084109916477704	-0.18590432510875798	-0.32504387346657193
As2O5	3.777604678333338	4.313725079583324	0.75 As2O5 + Li -> LiAsO3 + 0.25 As2O3	2 LiAsO3 -> As2O5 + 0.5 O2 + 2 Li	-0.4519590803288964	-0.1466361087837842	-0.1570302649166706
As2Pb14Cl4O17	2.305521413776038	3.8653833705882095	1.667 As2Pb14Cl4O17 + 4 Li -> Pb13(Cl3O5)2 + 1.333 Li3AsO4 + 0.6667 As3Pb5ClO9 + 7 PbO	0.6 As2Pb14Cl4O17 -> Pb3(ClO)2 + 0.85 Pb3O4 + 0.4 As3Pb5ClO12 + 0.85 Pb	-0.3427685983395681	-0.2681134790802564	-0.10558792102499703
As2Pb2O5	2.1133523556666685	3.394859283124996	0.8 As2Pb2O5 + 3 Li -> Li3AsO4 + 1.6 Pb + 0.6 As	1.333 As2Pb2O5 -> As2PbO4 + 0.3333 As2Pb3O8 + 0.6667 Pb	-0.3240864620723354	-0.22598613301281434	-0.2539181184848518
As2Pb3O8	2.6091518417084174	4.433155040000008	3.778 As2Pb3O8 + 6.667 Li -> As2Pb8O13 + 1.667 As2Pb2O5 + 2.222 Li3AsO4	As2Pb3O8 -> PbO2 + As2PbO6 + Pb	-0.3477920804815171	-0.19426800663934762	-0.10937701635134145
As2Pb8O13	2.3993010567187305	3.8740018540000096	1.667 As2Pb8O13 + 4 Li -> As2Pb2O5 + 1.333 Li3AsO4 + 11.33 PbO	0.8 As2Pb8O13 -> Pb3O4 + 0.8 As2Pb3O8 + Pb	-0.37824671616272987	-0.2743580469117681	-0.12385894266114894
As2PbO4	2.3607787294444447	3.5601382881249988	2 As2PbO4 + 2.25 Li -> As2Pb2O5 + 0.75 Li3AsO4 + 1.25 As	5 As2PbO4 -> As2Pb3O8 + 4 As2O3 + 2 Pb	-0.3128312901666366	-0.2087171126612828	-0.2839203610034069
As2PbO6	3.0273714295833543	5.103950471250008	3 As2PbO6 + 4.8 Li -> As2Pb3O8 + 1.2 As2O3 + 1.6 Li3AsO4	As2PbO6 -> As2O5 + 0.5 O2 + Pb	-0.36336232300000004	-0.15785311207446684	-0.09630362098269751
As2S2O9	3.7949141658333225	3.2139477476562717	As2S2O9 + 0.6667 Li -> As2SO6 + 0.3333 Li2S2O7 + 0.3333 SO2	1.75 As2S2O9 -> As2(SO4)3 + 0.75 As2O5 + 0.5 S	-0.3361786454348965	-0.13842969185485954	-0.3028324192779843
As2S3	2.059412728958323	2.22557606958335	As2S3 + Li -> LiAsS2 + AsS	LiAsS2 -> AsS2 + Li	-3.552713678800501e-15	-0.01123476985294225	-0.672790140019083
As2Se3	1.8206706766666583	2.1551892020052184	0.6667 As2Se3 + Li -> LiAsSe2 + 0.3333 As	2 LiAsSe2 -> As2Se3 + Se + 2 Li	0.0	0.0	-0.5381145369660065
As3(HO2)5	3.8134796297917593	4.355022350833284	3.667 As3(HO2)5 + 4 Li -> As3HO6 + 4 LiAs2H3O7 + 2.667 H2O	1.8 LiAs2H3O7 -> As3(HO2)5 + 0.2 LiAs3H2O9 + 0.4 O2 + 1.6 Li	-0.3383273963047677	-0.13310777632352977	-0.1097274991875068
As3Ir	0.8596531416666675	4.768220381666658	As3Ir + 3 Li -> Li3As + As2Ir	0.3333 As3Ir -> As + 0.3333 Ir	0.0	0.0	-0.48320769500000216
As3Pb2BrO6	2.2786311601111175	3.6320090666666687	2 As3Pb2BrO6 + 5.625 Li -> Pb3(BrO)2 + 0.5 As2Pb2O5 + 1.875 Li3AsO4 + 3.125 As	5 As3Pb2BrO6 -> As3Pb5BrO12 + 6 As2O3 + 2 PbBr2 + 3 Pb	-0.285269622708332	-0.19849561270833904	-0.26643812935897593
As3Pb2ClO6	2.3074749262962815	3.538896730833363	1.778 As3Pb2ClO6 + 3 Li -> Li3AsO4 + 1.333 AsPbClO2 + 0.4444 As3Pb5ClO9 + 1.667 As	1.167 As3Pb2ClO6 -> AsPbClO2 + 0.1667 As3Pb5ClO12 + As2O3 + 0.5 Pb	-0.28728953739583885	-0.20040318426042192	-0.27044231192307855
As3Pb5BrO12	2.4966288893598136	4.565571937083335	6.581 As3Pb5BrO12 + 21.29 Li -> As2Pb8O13 + 1.097 Pb13(Br3O5)2 + 5.323 As2Pb2O5 + 7.097 Li3AsO4	2 As3Pb5BrO12 -> Pb(BrO3)2 + 3 As2PbO6 + 6 Pb	-0.3240455935479396	-0.18632031158602258	-0.09703237078947868
As3Pb5ClO12	2.4764463194607345	4.613343775833332	8.25 As3Pb5ClO12 + 25.5 Li -> As2Pb14Cl4O17 + 0.75 As2Pb8O13 + 8.5 Li3AsO4 + 4.25 As3Pb5ClO9	2 As3Pb5ClO12 -> Pb(ClO3)2 + 3 As2PbO6 + 6 Pb	-0.32039759648026633	-0.18436113714516833	-0.09416991872808644
As3Pb5ClO9	2.078854004999982	3.253684168749981	0.5 As3Pb5ClO9 + 3 Li -> Li3AsO4 + 0.25 Pb3(ClO)2 + 1.75 Pb + 0.5 As	2 As3Pb5ClO9 -> As3Pb2ClO6 + As3Pb5ClO12 + 3 Pb	-0.31778294432292276	-0.23473387041667326	-0.229742690774561
As3Pb5O12F	2.4491905542083874	4.594495920833359	2.267 As3Pb5O12F + 6.667 Li -> As2Pb8O13 + 1.667 As2Pb2O5 + 2.267 LiF + 1.467 Li3AsO4	0.6667 As3Pb5O12F -> As2PbO6 + PbO2 + 0.3333 PbF2 + Pb	-0.328160072148453	-0.1858136676881772	-0.10266793950818753
AsAuO4	3.7208146199999783	4.8974586087500045	AsAuO4 + 3 Li -> Li3AsO4 + Au	2 AsAuO4 -> As2O5 + 1.5 O2 + 2 Au	-0.5795733347583316	-0.11413046817302486	-0.08359051870621448
AsF5	5.003796452083334	6.909823870833343	1.5 AsF5 + Li -> LiAsF6 + 0.5 AsF3	LiAsF6 -> AsF5 + 0.5 F2 + Li	-0.3661011667788441	0.0	-0.27843831419642484
AsHPb4(ClO)4	2.0500190161110736	3.4225031143750027	AsHPb4(ClO)4 + 1.125 Li -> HPbClO + 0.375 Li3AsO4 + 0.75 Pb3(ClO)2 + 0.75 PbCl2 + 0.625 As	4 AsHPb4(ClO)4 -> AsPbClO2 + As3Pb5ClO12 + 2 H2O + 7 PbCl2 + 3 Pb	-0.20529521441964693	-0.19521990111112464	-0.13039750552081708
AsHPbO4	2.8697587714583594	4.573470644999971	3.429 AsHPbO4 + 1.714 Li -> As2Pb3O8 + 0.5714 Li3AsO4 + 0.4286 As2PbO4 + 1.714 H2O	4 AsHPbO4 -> PbO2 + 2 As2PbO6 + 2 H2O + Pb	-0.3106225104712741	-0.17324614310345998	-0.09198570297218156
AsPbClO2	2.2625271616666547	3.6288784510416416	2.667 AsPbClO2 + 3 Li -> Li3AsO4 + 0.6667 Pb3(ClO)2 + 0.6667 PbCl2 + 1.667 As	15 AsPbClO2 -> As3Pb5ClO12 + 6 As2O3 + 7 PbCl2 + 3 Pb	-0.25251191513888793	-0.18979114860297686	-0.2399390150431029
AsPbF7	4.01703571708336	6.121476995000003	1.5 AsPbF7 + Li -> LiAsF6 + 0.5 AsF3 + 1.5 PbF2	2 AsPbF7 -> PbF4 + 2 AsF5 + Pb	-0.25688758722567084	-3.0734044128196407e-15	-0.20536172718283385
AsRhS	1.5681698804166624	4.322027710624999	3 AsRhS + 6 Li -> AsRh2 + As2Rh + 3 Li2S	AsRhS -> AsS + Rh	-1.3808836167121066e-15	0.0	-0.4947153904166637
AsRhSe	1.5212834766666603	4.291447492291668	3 AsRhSe + 6 Li -> AsRh2 + As2Rh + 3 Li2Se	9 AsRhSe -> As3Rh + 3 As2Se3 + 8 Rh	0.0	0.0	-0.38324172854166794
AsS	1.8979976585416747	2.162275290476181	3 AsS + 3 Li -> Li3AsS3 + 2 As	Li3AsS3 -> LiAsS2 + 0.25 LiS4 + 1.75 Li	-1.0798497330349877e-15	-0.003624642083330243	-0.6676986301919074
AsS(ClF2)3	4.186914601458369	3.061460768906251	0.08333 Li + 0.08333 As(S2F3)2 + 0.6667 SF6 -> SF4 + 0.08333 LiAsF6	3 AsS(ClF2)3 -> AsCl5 + 2 AsCl2F3 + 2 SF6 + S	-0.3131599028455865	-3.3899802443958618e-15	-0.4281926836202772
AsS2	2.2255760695833398	2.22557606958335	AsS2 + Li -> LiAsS2	LiAsS2 -> AsS2 + Li	0.0	-0.002809126797617134	-0.6905933948053875
AsSe(ClF2)3	4.013352444583337	4.792230087252601	1.5 AsSe(ClF2)3 + Li -> LiAsF6 + 1.125 SeCl4 + 0.375 SeF4 + 0.5 AsF3	3 AsSe(ClF2)3 -> AsClF8 + 2 AsF5 + 4 Cl2 + 3 Se	-0.35399442253151125	0.0	-0.28737025468391453
AsXe2F9	5.783293298333315	5.98949845583328	2.5 AsXe2F9 + Li -> LiAs(XeF4)3 + 1.5 AsXeF7 + 0.5 Xe	LiAs(XeF4)3 -> AsXe2F9 + XeF3 + Li	-0.6473095269930509	0.0	-0.33236400251644693
AsXeF7	5.692103306666655	5.98949845583328	6 AsXeF7 + 6 Li -> LiAs(XeF4)3 + 5 LiAsF6 + 3 Xe	LiAs(XeF4)3 -> AsXe2F9 + XeF3 + Li	-0.5248554386450253	0.0	-0.30415401154660393
Au2O3	3.422298781666653	4.766044649166666	0.6667 Au2O3 + Li -> LiAuO2 + 0.3333 Au	0.6667 Au2O3 -> O2 + 1.333 Au	-0.8906588575859495	-0.07149799109756239	-0.04618660183214418
Au2S	1.9501622758333363	5.089537569062504	Au2S + Li -> LiAuS + Au	Au2S -> S + 2 Au	0.0	0.0	-0.5200884794999956
Au3F8	5.045559130833336	5.840771366666648	0.5 Au3F8 + Li -> LiAuF4 + 0.5 Au	3 LiAuF4 -> LiAuF6 + 2 AuF3 + 2 Li	-0.7467014098138205	0.0	-0.3984003324711429
AuBr	2.8658136508333367	4.824980471249993	AuBr + Li -> Au + LiBr	3 AuBr -> AuBr3 + 2 Au	-0.15225176069099455	0.0	-0.10176587337499743
AuBr3	2.9607941220833354	5.285668745833333	AuBr3 + 2 Li -> AuBr + 2 LiBr	0.3333 AuBr3 -> Br + 0.3333 Au	-0.19286611291666433	0.0	-0.043840927272728925
AuBrF6	5.199263490833314	5.7090130166666855	1.083 AuBrF6 + Li -> LiAuF4 + 0.08333 AuBr3 + 0.8333 BrF3	AuBrF6 -> BrF5 + 0.3333 AuF3 + 0.6667 Au	-0.7962856831770837	0.0	-0.37053909441106203
AuCl	3.2294217533333365	4.839111782499998	AuCl + Li -> Au + LiCl	2 AuCl -> AuCl2 + Au	-0.23020033158385234	0.0	-0.10734076749999949
AuCl3	3.373382008333337	5.158069469166665	AuCl3 + Li -> AuCl2 + LiCl	0.6667 AuCl3 -> Cl2 + 0.6667 Au	-0.28904268729165783	0.0	-0.09932215804687439
AuClO	3.337423754166668	4.844549830952371	2 AuClO + 2 Li -> AuCl + LiCl + LiAuO2	3 AuClO -> ClO3 + 0.6667 AuCl3 + 2.333 Au	-0.6096544249283609	-0.06018447322222231	-0.09207738541666743
AuF3	5.151460241666673	5.553050658888875	4 AuF3 + Li -> Au3F8 + LiAuF4	1.667 AuF3 -> AuF5 + 0.6667 Au	-0.758931917077208	0.0	-0.39026374476562564
AuF5	6.591187746666665	7.0289720258333475	1.5 AuF5 + Li -> LiAuF6 + 0.5 AuF3	LiAuF6 -> AuF5 + 0.5 F2 + Li	-1.0303803099875006	0.0	-0.5096312553782865
AuI	2.312915865833337	5.176700520000002	AuI + Li -> Au + LiI	2 AuI -> AuI2 + Au	-0.034589411942884674	0.0	-0.21039178581050688
AuN5O14	4.017096784583355	5.426172467500003	0.25 AuN5O14 + Li -> LiNO3 + 0.25 Au + 0.25 NO2	0.25 AuN5O14 -> NO3 + 0.25 NO2 + 0.25 Au	-0.810266550689752	0.0	-0.10091738883853685
AuS3(O3F)3	4.770832804583346	3.282003524826397	AuS3(O3F)3 + Li -> LiSO3F + AuSO4 + S(OF)2	2 AuS3(O3F)3 -> Au2O3 + 3 S(OF)2 + 4.5 O2 + 3 S	-0.45617301739942295	-0.06327246841345868	-0.23930794051339266
AuSCl5	3.386112565555554	2.339914915520834	0.2222 AuSCl5 + Li -> LiCl + 0.1111 Au2S + 0.1111 SCl	2 AuSCl5 -> AuCl3 + AuSCl7 + S	-0.24766125008264384	0.0	-0.5006115501785611
AuSCl7	3.4525123295833264	2.6574724080208303	AuSCl7 + 2 Li -> AuSCl5 + 2 LiCl	AuSCl7 -> AuCl3 + 2 Cl2 + S	-0.2625452563922156	0.0	-0.44856376764706507
AuSO4	4.149554522708331	3.279598204895839	AuSO4 + 2 Li -> Li2SO4 + Au	2 AuSO4 -> Au2O3 + 2.5 O2 + 2 S	-0.4487870759706225	-0.06702654695833354	-0.16681276287499047
AuSeBr	2.8729379145833303	4.715782422916679	AuSeBr + Li -> AuSe + LiBr	4 AuSeBr -> SeBr4 + 3 AuSe + Au	-0.1143567489062507	0.0	-0.306006703263888
AuSeCl7	3.373382008333323	4.514080020585933	Li + AuCl3 -> AuCl2 + LiCl	AuSeCl7 -> AuCl3 + 2 Cl2 + Se	-0.25599700884051013	0.0	-0.21501465431372457
AuSeClO3	3.878083832083309	4.60226956147137	0.5 AuSeClO3 + Li + 0.5 AuClO -> AuCl + 0.5 Li2SeO4	1.4 AuSeClO3 -> AuClO + 0.2 Au2Se3O10 + 0.4 ClO3 + 0.8 Se	-0.5692640490118572	-0.1042384394722774	-0.1473138635714295
B(HO)3	1.9411971999999942	3.72986228083329	5 B(HO)3 + 3 Li -> Li3B5(HO5)2 + 1.5 H2 + 5 H2O	Li3B5(HO5)2 -> LiB5H2O9 + 0.5 O2 + 2 Li	-0.024396533322145864	-0.14178687464910755	-0.02249989000297692
B10(Pb2O7)3	2.154929167440479	4.265464451071388	3 B10(Pb2O7)3 + 28 Li -> B2Pb4O7 + 28 LiBO2 + 14 Pb	0.5714 B10(Pb2O7)3 -> PbO2 + 1.429 B4PbO7 + Pb	-0.16522633989797075	-0.21383415969511832	-0.07720428288388259
B2Mo(PbO2)6	2.1128564169791346	3.9895012421052405	3 B2Mo(PbO2)6 + 6 Li -> B2Pb4O7 + 3 MoO2 + Li6B4O9 + 14 PbO	1.053 B2Mo(PbO2)6 -> Pb3O4 + 1.053 MoPbO4 + 0.2105 B10(Pb2O7)3 + Pb	-0.3582474657611012	-0.2534637223796876	-0.09861818066891903
B2O3	2.1828492451737	4.295220271111055	6.062 B2O3 + 3 Li -> Li3B11O18 + 0.1875 B6O	0.1818 Li3B11O18 -> B2O3 + 0.1364 O2 + 0.5455 Li	-0.019407127368413768	-0.1922378065579824	-0.08641523545573371
B2Pb2S5	1.762704853277775	3.3967577718750035	4.333 B2Pb2S5 + 5 Li -> Li5B7S13 + 1.667 B + 8.667 PbS	0.5 B2Pb2S5 -> BS2 + 0.5 PbS + 0.5 Pb	-0.004326987184010811	-0.1726161248809519	-0.7958068658333339
B2Pb4O7	2.0933254696353876	3.8558354821428282	2 B2Pb4O7 + 6 Li -> Li6B4O9 + 3 Pb + 5 PbO	1.429 B2Pb4O7 -> Pb3O4 + 0.2857 B10(Pb2O7)3 + Pb	-0.30337632907738943	-0.28599136916667245	-0.10346385902624355
B2S2O9	4.283085243333318	3.227674631631949	1.25 B2S2O9 + Li -> LiB(SO4)2 + 0.75 B2O3 + 0.5 SO2	B2S2O9 -> B2O3 + 3 O2 + 2 S	-0.30852067180322695	-0.1545040852941173	-0.19088703731508128
B2S3	1.8469913475177786	2.1094017351483094	4.333 B2S3 + 5 Li -> Li5B7S13 + 1.667 B	0.2 Li5B7S13 -> BS2 + 0.2 B2S3 + Li	0.0	-0.21942926233528848	-0.9721652892306296
B2Se2O7	3.718128785247295	4.449210971210994	4 B2Se2O7 + 2 Li -> Li2B8SeO15 + 0.5 Se + 6.5 SeO2	1.75 B2Se2O7 -> B2Se3O10 + 0.75 B2O3 + 0.5 Se	-0.40250207700579566	-0.16395750500000483	-0.18449049441359167
B3Pb10Br3O13	2.05607074182295	3.965966755000008	1.333 B3Pb10Br3O13 + 6 Li -> Li6B4O9 + 1.667 PbO + 0.6667 Pb13(Br3O5)2 + 3 Pb	0.8333 B3Pb10Br3O13 -> Pb3(BrO)2 + 0.5 B5Pb2BrO9 + 1.083 Pb3O4 + 1.083 Pb	-0.28096475808425314	-0.26938299222221485	-0.08519066347492288
B3Pb3NO10	2.906916668083279	4.27908402392856	4.455 B3Pb3NO10 + 12.27 Li -> Pb3(NO4)2 + 2.591 B2Pb4O7 + 2.045 Li6B4O9 + 1.227 N2	1.333 B3Pb3NO10 -> B4PbO7 + 0.6667 Pb(NO3)2 + 1.167 PbO2 + 1.167 Pb	-0.33558123447878785	-0.20234661463982517	-0.07282321946427306
B3Pb6BrO10	2.086155746996486	3.9456036309999836	3 B3Pb6BrO10 + 9 Li -> B3Pb10Br3O13 + 1.5 Li6B4O9 + 3.5 PbO + 4.5 Pb	6 B3Pb6BrO10 -> B3Pb10Br3O13 + 3 B5Pb2BrO9 + 5 Pb3O4 + 5 Pb	-0.2680356285080876	-0.2621831732143005	-0.0906932345985556
B3Pb6ClO10	2.055066381197978	3.9555726178571047	6 B3Pb6ClO10 + 27 Li -> Pb13(Cl3O5)2 + 9.5 PbO + 4.5 Li6B4O9 + 13.5 Pb	0.9524 B3Pb6ClO10 -> Pb3O4 + 0.1905 Pb3(ClO)2 + 0.5714 B5Pb2ClO9 + Pb	-0.2669004380241917	-0.2625725569642854	-0.09181861578124595
B4PbO7	2.4026005782142628	4.7520432491667846	27 B4PbO7 + 42 Li -> B10(Pb2O7)3 + 14 Li3B7O12 + 21 Pb	2 B4PbO7 -> PbO2 + 4 B2O3 + Pb	-0.09666825052436412	-0.1967101945833234	-0.07349132965906602
B5Pb2BrO9	2.076143008833316	4.814368833611114	8 B5Pb2BrO9 + 20 Li -> Pb3(BrO)2 + 10 Li2B4O7 + 3 PbBr2 + 10 Pb	4 B5Pb2BrO9 -> PbBr2 + Pb(BrO3)2 + 10 B2O3 + 6 Pb	-0.0734799153143939	-0.18624208116196583	-0.06172787325301332
B5Pb2ClO9	2.055134617500023	4.843622329408606	B5Pb2ClO9 + 3 Li -> Li2B4O7 + LiBO2 + 0.5 PbCl2 + 1.5 Pb	16 B5Pb2ClO9 -> PbCl4 + 12 ClO2 + 40 B2O3 + 31 Pb	-0.07753180959050976	-0.1859715103802826	-0.07050725190726359
B5Pb2IO9	2.2268710932499824	4.30515605809523	1.4 B5Pb2IO9 + 3 Li -> Li3B7O12 + 0.4 PbI2 + 0.3 Pb3(IO)2 + 1.5 Pb	4 B5Pb2IO9 -> Pb(IO3)2 + 10 B2O3 + 2 I + 7 Pb	-0.08880520564014827	-0.19091877316902606	-0.13145799065743446
B6O	0.732758157564084	3.3839807448889037	0.5294 B6O + 1.529 Li -> LiB3 + 0.1765 Li3BO3	4 Li3BO3 -> Li6B4O9 + 0.375 LiO8 + 5.625 Li	-0.08375632575634073	-0.2441294317959688	-1.2672427266511255
B9Pb8O21F	2.153109461145843	4.015763697618819	B9Pb8O21F + 8 Li -> B2Pb4O7 + 7 LiBO2 + LiF + 4 Pb	1.905 B9Pb8O21F -> Pb3O4 + 1.714 B10(Pb2O7)3 + 0.9524 PbF2 + Pb	-0.2041072781287845	-0.22410959720930057	-0.08744428551535766
BF3	2.9261888519444286	6.76296330874998	1.333 BF3 + Li -> LiBF4 + 0.3333 B	LiBF4 -> BF3 + 0.5 F2 + Li	-0.1312514734374961	0.0	-0.2339137777022171
BH(PbO2)2	2.0544929954688005	3.939047926785661	2 BH(PbO2)2 + 3 Li -> H2O + 0.5 Li6B4O9 + 1.5 Pb + 2.5 PbO	2.857 BH(PbO2)2 -> Pb3O4 + 0.2857 B10(Pb2O7)3 + 1.429 H2O + Pb	-0.2668268170572876	-0.2555296568229162	-0.09114100524032054
BH3	1.9872169946795495	1.8422288508333289	1.5 BH3 + 1.083 Li -> LiBH4 + 0.08333 Li(BH)6	LiBH4 -> BH3 + 0.5 H2 + Li	-0.051711568020832654	-0.12569602645299938	-0.9654492697678743
BHO2	2.531972755833232	4.541309979999992	6 BHO2 + Li -> LiB5H2O9 + B(HO)3 + 0.5 H2	0.5 LiB5H2O9 -> BHO2 + 0.75 B2O3 + 0.125 O2 + 0.5 Li	-0.023179244079386763	-0.1658802620238231	-0.04602966054061408
BHS3O11	4.562101182083216	3.1971739255208345	2.333 BHS3O11 + Li -> LiB(S2O7)2 + 0.6667 B2S2O9 + 1.167 H2SO4 + 0.5 SO2	2 BHS3O11 -> B2S2O9 + H2SO4 + 4.5 O2 + 3 S	-0.3430935325099731	-0.12345091273437392	-0.21163110458154932
BN	0.07349449833333921	0.8682966708333343	2 BN + 3.333 Li -> Li3BN2 + 0.3333 LiB3	Li3BN2 -> BN + 0.3333 LiN3 + 2.667 Li	-1.9515012855686465e-15	-0.32586608975000697	-0.5539649493028991
BP(PbO2)4	2.2817746403645724	3.8772751999999295	2 BP(PbO2)4 + 2 Li -> B2Pb4O7 + 2 LiPPbO4 + Pb + PbO	2.105 BP(PbO2)4 -> Pb3O4 + 0.2105 B10(Pb2O7)3 + 1.053 P2Pb3O8 + Pb	-0.24463878818188523	-0.2361150123333302	-0.11035668800001552
BPO4	2.287781406666661	4.081364491458318	3 BPO4 + 5 Li -> Li2B3PO8 + Li3PO4 + P	5.5 Li2B3PO8 -> Li3B11O18 + 5.5 BPO4 + 2 O2 + 8 Li	-0.014073648643613268	-0.1323386695833355	-0.11993689368055316
BPPbO5	2.322591181250017	4.751758780833333	2 BPPbO5 + 2 Li -> LiPPbO4 + 0.5 Li2B3PO8 + 0.5 BPO4 + Pb	2 BPPbO5 -> PbO2 + 2 BPO4 + Pb	-0.10820849478125982	-0.15911251112499958	-0.11394118737499204
BPb2O3F	2.267737265083228	3.939732348333268	21 BPb2O3F + 20 Li -> B9Pb8O21F + 6 B2Pb4O7 + 20 LiF + 10 Pb	6 BPb2O3F -> Pb3O4 + 0.6667 B9Pb8O21F + 2.667 PbF2 + Pb	-0.25334719272727746	-0.23452274371796156	-0.10954650508146502
BS2	2.0626085432440497	2.1094017351483094	9 BS2 + 7 Li -> Li2B2S5 + Li5B7S13	0.2 Li5B7S13 -> BS2 + 0.2 B2S3 + Li	-3.877336196833614e-15	-0.1607390426215276	-0.9040773159518785
BSF7	4.287203660781252	2.7217038154687265	BSF7 + Li -> LiBF4 + 0.25 S + 0.75 SF4	1.5 BSF7 -> SF6 + 1.5 BF3 + 0.5 S	-0.28843572506610915	0.0	-0.4921071389705869
BSe2	1.7999403494791766	2.136252040755197	2.5 BSe2 + 2 Li -> Li2B2Se5 + 0.5 B	0.5 Li2B2Se5 -> BSe2 + 0.5 Se + Li	-0.0314893388880102	-0.15906123146694484	-0.9755927003050724
Ba(Ag3O2)2	2.6835071104166492	2.873791651250003	Ba(Ag3O2)2 + 2 Li -> Ba(AgO)2 + 2 LiAgO + 2 Ag	0.5 Ba(Ag3O2)2 -> Ag2O + AgO + 0.5 Ba	-0.5892012220192338	-0.230310977826091	-0.10716515526597359
Ba(AgTe)2	1.3784608729166674	2.0124046749999964	Ba(AgTe)2 + 2 Li -> Li2Te + BaTe + 2 Ag	0.5 Ba(AgTe)2 -> AgTe + 0.5 Ba	-0.02287372649128039	-0.1852101861399995	-0.47716229413490363
Ba(AlCl4)2	1.5494185208333349	3.7574300475	0.1667 Ba(AlCl4)2 + Li -> LiCl + 0.1667 BaCl2 + 0.3333 Al	0.3333 Ba(AlCl4)2 -> Cl2 + 0.3333 BaCl2 + 0.6667 Al	-0.050913128888889325	-0.1756792365217401	-0.2647573903907836
Ba(AlS2)2	1.0411055013888932	2.4461055638888896	Ba(AlS2)2 + 1.5 Li -> BaS + 1.5 LiAlS2 + 0.5 Al	4 Ba(AlS2)2 -> BaAl4S7 + 3 BaS3 + 4 Al	-0.03423742033784283	-0.3575301292753612	-0.8710454447011204
Ba(AlSe2)2	1.0456766483333328	2.28207363916666	0.3333 Ba(AlSe2)2 + 2 Li -> Li2Se + 0.3333 BaSe + 0.6667 Al	Ba(AlSe2)2 -> BaSe3 + 0.3333 Al2Se3 + 1.333 Al	-0.03509676342187573	-0.27540986952891355	-0.807261682354651
Ba(AlTe2)2	1.1043859191666674	1.8572297827083297	0.3333 Ba(AlTe2)2 + 2 Li -> Li2Te + 0.3333 BaTe + 0.6667 Al	5 Ba(AlTe2)2 -> Al2Te5 + 5 BaTe3 + 8 Al	-0.10631742429166713	-0.4010655672191288	-0.9708410463839239
Ba(AuF4)2	4.3591563699999964	5.887814707708337	0.1667 Ba(AuF4)2 + Li -> LiF + 0.1667 BaF2 + 0.3333 Au	1.667 Ba(AuF4)2 -> Ba(AuF6)2 + 0.6667 BaF2 + 1.333 Au	-0.5485500641819119	-0.03887707163042742	-0.26459686296052887
Ba(AuF6)2	6.324092566458271	6.456925423750074	0.75 Ba(AuF6)2 + Li -> LiAuF6 + 0.25 Ba(AuF4)2 + 0.5 BaF2	0.5 Ba(AuF6)2 -> AuF5 + 0.5 F2 + 0.5 Ba	-0.833546566980933	-0.03860760157407084	-0.4189205906323552
Ba(AuO2)2	2.4655413417708187	3.8905973024999985	9 Ba(AuO2)2 + 24 Li -> Ba9(AuO6)2 + 8 Li3AuO3 + 8 Au	2 Ba(AuO2)2 -> O2 + 2 Au2O3 + 2 Ba	-0.7484146112500119	-0.17425895499999844	-0.047511375425150826
Ba(BH)12	0.3969981294047846	3.713333383636288	Ba(BH)12 + 7 Li -> Li(BH)6 + BaB6 + 6 LiH	0.9167 Ba(BH)12 -> B9H11 + 2 B + 0.9167 Ba	-0.024919763495834246	-0.17887371442080235	-1.0858017837976217
Ba(BO2)2	1.2354389713334433	3.5175704493749795	5.417 Ba(BO2)2 + 1.667 Li -> Ba2B2O5 + 1.667 Ba2Li(BO2)5 + 0.08333 BaB6	2 Ba(BO2)2 -> BaB4O7 + 0.5 O2 + Ba	-0.06591018109440938	-0.2438285807246472	-0.03955230854615177
Ba(BS2)2	1.6134938302777786	2.4041663568749843	3 Ba(BS2)2 + 3 Li -> BaLi(BS2)3 + 2 BaLiBS3 + B	0.5 Ba(BS2)2 -> BS2 + 0.5 Ba	-0.003004243164611786	-0.294665737391294	-0.8989071920111631
Ba(BSe3)2	1.8218251218333528	2.1716271362500446	3 Ba(BSe3)2 + 2 Li -> Li2B2Se5 + 0.8 Ba2B4Se13 + 0.2 Ba7B4Se13	2.5 Ba(BSe3)2 -> Ba2B4Se13 + BSe2 + 0.5 Ba	-0.045297894588653964	-0.2202439777791123	-0.8050966964237576
Ba(BeN)2	0.22523719833334255	0.6816708012499918	Ba(BeN)2 + 2 Li + Ba2N -> Ba3N + 2 LiBeN	3 Ba(BeN)2 -> BaN2 + 2 Be3N2 + 2 Ba	-0.3694467320652093	-0.7096679766346186	-0.8218695324882725
Ba(BiS2)2	1.657336816481482	2.471583892083332	0.3333 Ba(BiS2)2 + 2 Li -> Li2S + 0.3333 BaS + 0.6667 Bi	3 Ba(BiS2)2 -> BaS3 + 3 Bi2S3 + 2 Ba	-0.008229443963980287	-0.1648414440338135	-0.6847162313504103
Ba(BrO3)2	2.8617012491666642	4.4170133487500145	Ba(BrO3)2 + 12 Li -> BaBr2 + 6 Li2O	Ba(BrO3)2 -> Br2O3 + 1.5 O2 + Ba	-1.0629015610664587	-0.1310021181060539	-0.06215485238279428
Ba(CdP)2	0.7139928215686284	1.403830504999996	8.2 Ba(CdP)2 + 20.4 Li -> BaCd11 + 5.6 Li3P + 1.8 Ba4Li2(CdP2)3	Ba(CdP)2 -> Cd + CdP2 + Ba	-0.15665967596774144	-0.31856483114000045	-1.1063910184770445
Ba(CuO)2	1.874567953333334	2.2898837949999957	Ba(CuO)2 + 2 Li -> Li2O + BaO + 2 Cu	0.5 Ba(CuO)2 -> CuO + 0.5 Ba	-0.423568600694451	-0.38003842638888763	-0.18096845696602593
Ba(DyS2)2	0.5832149008333367	2.5391677524999943	Ba(DyS2)2 + 2 Li -> Li2S + BaS + 2 DyS	Ba(DyS2)2 -> Dy2S3 + 0.3333 BaS3 + 0.6667 Ba	-0.022735940810821642	-0.3333518505797137	-0.7787937206150783
Ba(DySe2)2	0.5412417133333509	2.3315908703124872	Ba(DySe2)2 + Li -> LiDySe2 + BaSe + DySe	3 Ba(DySe2)2 -> Dy6Se11 + 0.3333 BaSe3 + 2.667 Ba	-0.027927161921873722	-0.2543462994564494	-0.6400959452067716
Ba(DyTe2)2	0.5049881845833362	1.9124755124999988	Ba(DyTe2)2 + 2 Li -> Li2Te + BaTe + 2 DyTe	Ba(DyTe2)2 -> DyTe3 + BaTe + Dy	-0.10965294779166124	-0.3849988105162312	-0.7828306969642851
Ba(ErS2)2	0.5174072083333474	2.529653247222219	Ba(ErS2)2 + Li -> LiErS2 + BaS + ErS	2 Ba(ErS2)2 -> ErS2 + 2 BaS3 + 3 Er	-0.0277891201351399	-0.36351883141304486	-0.7860797376388882
Ba(ErSe2)2	0.47029090083335134	2.333223101666665	Ba(ErSe2)2 + Li -> LiErSe2 + BaSe + ErSe	3 Ba(ErSe2)2 -> Er2Se3 + 3 BaSe3 + 4 Er	-0.03550354742187567	-0.2866856264854345	-0.6548246261748143
Ba(ErTe2)2	0.4169762945833373	1.8894799391666641	Ba(ErTe2)2 + 2 Li -> Li2Te + BaTe + 2 ErTe	Ba(ErTe2)2 -> ErTe3 + BaTe + Er	-0.12093592095833428	-0.41977960428434713	-0.806804070803572
Ba(FeBr4)2	2.4323757043750014	4.243427006458334	0.1667 Ba(FeBr4)2 + Li -> LiBr + 0.1667 BaBr2 + 0.3333 Fe	0.1667 Ba(FeBr4)2 -> Br + 0.1667 BaBr2 + 0.3333 Fe	-0.13783150483796125	-0.07700380264285545	-0.21913467118054797
Ba(FeO2)2	2.1893001515476094	2.7393426149999565	2 Ba(FeO2)2 + Li -> LiFeO2 + Ba2Fe2O5 + FeO	5 Ba(FeO2)2 -> Ba4Fe4O11 + 3 Fe2O3 + Ba	-0.3775908875000069	-0.33454656433823704	-0.12115998133878314
Ba(GaO2)2	1.5696567916667132	3.3493318725000183	2 Ba(GaO2)2 + Li -> LiGaO2 + 0.6667 Ba3Ga4O9 + 0.3333 Ga	2 Ba(GaO2)2 -> BaGa4O7 + 0.5 O2 + Ba	-0.29768351250002034	-0.27816126593137236	-0.058325789449702015
Ba(GaS2)2	1.473793459166678	2.719464489999965	2 Ba(GaS2)2 + 1.5 Li -> Ba2Ga2S5 + 1.5 LiGaS2 + 0.5 Ga	2 Ba(GaS2)2 -> BaGa4S7 + 0.3333 BaS3 + 0.6667 Ba	-0.035767784527017454	-0.1480913292753605	-0.7172714586677678
Ba(GaSe2)2	1.2977038258333322	2.6432587524999898	0.3333 Ba(GaSe2)2 + 2 Li -> Li2Se + 0.3333 BaSe + 0.6667 Ga	Ba(GaSe2)2 -> Ga2Se3 + 0.3333 BaSe3 + 0.6667 Ba	-0.008243886921875498	-0.1233989942028797	-0.5682175479416967
Ba(GaTe2)2	1.335295693333344	2.0585364887499886	Ba(GaTe2)2 + Li -> LiGaTe2 + BaTe + GaTe	2 Ba(GaTe2)2 -> Ga2Te3 + Ga2Te5 + 2 Ba	-0.038714690896945125	-0.16175387060550572	-0.6622377587053674
Ba(GdS2)2	0.6777104558333384	2.4490929266071397	Ba(GdS2)2 + 2 Li -> Li2S + BaS + 2 GdS	5 Ba(GdS2)2 -> Gd10S19 + 0.3333 BaS3 + 4.667 Ba	-0.0048904331081187635	-0.24495056116666092	-0.7614511314484136
Ba(GdSe2)2	0.7027533933333601	2.28347807999996	Ba(GdSe2)2 + Li -> LiGdSe2 + BaSe + GdSe	0.5 Ba(GdSe2)2 -> GdSe2 + 0.5 Ba	-0.01602105027026024	-0.15406661569041957	-0.6033972822086464
Ba(GdTe2)2	0.6823219708333355	1.966584672499991	Ba(GdTe2)2 + 2 Li -> Li2Te + BaTe + 2 GdTe	0.5 Ba(GdTe2)2 -> GdTe2 + 0.5 Ba	-0.0892265658282918	-0.2687717112408632	-0.7480766753769847
Ba(GeP)2	0.7988053966666682	1.247429793750008	2 Ba(GeP)2 + 6 Li -> Ba2GeP2 + 2 Li3P + 3 Ge	1.5 Ba(GeP)2 -> BaP3 + 3 Ge + 0.5 Ba	-0.1261228604181177	-0.3234004881349204	-1.2143113959355043
Ba(HO)2	0.9859192860416621	3.1946101883333307	1.5 Ba(HO)2 + 6 Li -> BaLiH3 + 2.5 Li2O + 0.5 BaO	3 Ba(HO)2 -> BaH4O3 + 0.5 Ba(H2O3)2 + 1.5 Ba	-0.19204376276785595	-0.34743472374999396	-0.10947269390523129
Ba(HoS2)2	0.542298387083342	2.5311789553472175	Ba(HoS2)2 + 2 Li -> Li2S + BaS + 2 HoS	3 Ba(HoS2)2 -> Ho2S3 + 3 BaS3 + 4 Ho	-0.024136064121632383	-0.3457310841304304	-0.7824624089484111
Ba(HoTe2)2	0.46128525708333434	1.882676630833332	Ba(HoTe2)2 + 2 Li -> Li2Te + BaTe + 2 HoTe	Ba(HoTe2)2 -> HoTe3 + BaTe + Ho	-0.11434392679166239	-0.39968788939304156	-0.7948799916071421
Ba(IO3)2	2.988072019895837	4.285576776250005	4 Ba(IO3)2 + 16 Li -> Ba2LiIO6 + 2 BaI2 + 3 Li5IO6	Ba(IO3)2 -> I2O5 + 0.5 O2 + Ba	-0.7653255678967268	-0.1680009178859676	-0.064262557926829
Ba(InS2)2	1.4939136133333424	2.742185244999995	2 Ba(InS2)2 + 1.5 Li -> Ba2In2S5 + 1.5 LiInS2 + 0.5 In	3 Ba(InS2)2 -> BaS3 + 3 In2S3 + 2 Ba	-0.030155394560828608	-0.15108345619564956	-0.6946065206547709
Ba(InSe2)2	1.3842185450000013	2.5833330956249965	0.6667 Ba(InSe2)2 + Li -> LiInSe2 + 0.6667 BaSe + 0.3333 In	Ba(InSe2)2 -> In2Se3 + 0.3333 BaSe3 + 0.6667 Ba	-0.014452285878374216	-0.12712214742751593	-0.4646438485317441
Ba(InTe2)2	1.268922397916664	2.094660777944438	0.8333 Ba(InTe2)2 + Li -> LiInTe2 + 0.1667 In4Te3 + 0.8333 BaTe	7.5 Ba(InTe2)2 -> In7Te10 + 4 In2Te5 + 7.5 Ba	-0.01683214816666667	-0.15983988153304196	-0.5733949794957554
Ba(LuS2)2	0.37418740583333765	2.575342041666662	Ba(LuS2)2 + 2 Li -> Li2S + BaS + 2 LuS	3 Ba(LuS2)2 -> Lu2S3 + 3 BaS3 + 4 Lu	-1.429469201817492e-15	-0.36992637054348165	-0.7986514011309516
Ba(LuSe2)2	0.30067102374999877	2.3611808256249964	0.3333 Ba(LuSe2)2 + 2 Li -> Li2Se + 0.3333 BaSe + 0.6667 Lu	3 Ba(LuSe2)2 -> Lu2Se3 + 3 BaSe3 + 4 Lu	-0.008996368250934417	-0.29473110920282664	-0.6860076908176715
Ba(LuTe2)2	0.41756451560606145	1.9264928231666623	0.3636 Ba(LuTe2)2 + 2 Li -> Li2Te + 0.09091 Lu8Te + 0.3636 BaTe	3 Ba(LuTe2)2 -> LuTe3 + 3 BaTe3 + 5 Lu	-0.10664193959523782	-0.4350968390669563	-0.8571504668956034
Ba(MgAs)2	0.253516348115987	1.2714049554166655	Ba(MgAs)2 + 4.013 Li -> Li3As + 0.01342 LiMg149 + BaLiAs	Ba(MgAs)2 -> BaAs2 + 2 Mg	-0.23066360027566457	-0.5593400693105874	-1.0087641313852291
Ba(MgP)2	0.2284248527648196	1.2403868062499983	Ba(MgP)2 + 4.013 Li -> Li3P + 0.01342 LiMg149 + BaLiP	Ba(MgP)2 -> BaP2 + 2 Mg	-0.23795945625522386	-0.56447462023496	-1.3270417702536363
Ba(NO3)2	2.22560993333333	5.035460271875011	0.2 Ba(NO3)2 + 2 Li -> Li2O + 0.2 BaO + 0.2 N2	0.5 Ba(NO3)2 -> NO3 + 0.5 Ba	-0.6637749690045576	-0.09892478644998492	-0.004273069569367238
Ba(NbN2)2	1.3229122833333236	1.161372639431771	8 Ba(NbN2)2 + 7 Li -> Nb5N6 + 7 LiNbN2 + 4 Ba2NbN3	2.5 Ba(NbN2)2 -> Nb5N6 + 0.6667 BaN6 + 1.833 Ba	-0.19855499053070114	-0.42881922544151596	-0.7693544396530778
Ba(NdS2)2	0.8202491508333374	2.2257463705555685	Ba(NdS2)2 + 2 Li -> Li2S + BaS + 2 NdS	10 Ba(NdS2)2 -> BaS2 + 2 Nd10S19 + 9 Ba	-0.011452016689195155	-0.35124739476448896	-0.7533097776785702
Ba(PN2)2	0.7237497357065354	2.2783326912499966	4 Ba(PN2)2 + 23 Li -> Ba4P3 + 2 LiPN2 + 3 Li7PN4	1.5 Ba(PN2)2 -> P3N5 + 0.5 N2 + 1.5 Ba	-0.08955464331082119	-0.32904395457142743	-0.7585663190925458
Ba(PO3)2	2.649562447666726	4.618098002500278	5.6 Ba(PO3)2 + 3 Li -> Ba2Li3(PO3)7 + 1.8 Ba2P2O7 + 0.6 P	2 Ba(PO3)2 -> BaP4O11 + 0.5 O2 + Ba	-0.06961291068413455	-0.14146559877193554	-0.11510754030801529
Ba(PdS2)2	1.8651083439583402	2.256205099999982	Ba(PdS2)2 + 2 Li -> BaPdS2 + Li2S + PdS	0.5 Ba(PdS2)2 -> PdS2 + 0.5 Ba	-0.0094845249662181	-0.17275883918478208	-0.6392424824285747
Ba(Si3N4)2	0.8279214211011805	0.8953101249998119	4.5 Ba(Si3N4)2 + 9.333 Li -> Ba2Si5N8 + 0.8333 Ba3Si4 + 9.333 LiSi2N3	0.5 Ba(Si3N4)2 -> Si3N4 + 0.5 Ba	-0.11217649217427628	-0.4461753676142137	-0.804638612370975
Ba(SmS2)2	0.7402692445833381	2.312976368749991	Ba(SmS2)2 + 2 Li -> Li2S + BaS + 2 SmS	0.5 Ba(SmS2)2 -> SmS2 + 0.5 Ba	-0.008201173716231303	-0.34732480391304166	-0.7611548561309531
Ba(SmSe2)2	0.6749216108333371	2.232801712499989	Ba(SmSe2)2 + 2 Li -> Li2Se + BaSe + 2 SmSe	0.5 Ba(SmSe2)2 -> SmSe2 + 0.5 Ba	-0.007382373111111562	-0.26238728637673914	-0.5993217288815726
Ba(SmTe2)2	0.673258959583336	1.8587744474999999	Ba(SmTe2)2 + 2 Li -> Li2Te + BaTe + 2 SmTe	Ba(SmTe2)2 -> SmTe3 + BaTe + Sm	-0.08097368480421885	-0.3871066035234776	-0.7427767838293577
Ba(TaN2)2	1.2958769994791695	1.1589109910937203	4 Ba(TaN2)2 + 4 Li -> LiTa3N4 + 3 LiTaN2 + 2 Ba2TaN3	1.5 Ba(TaN2)2 -> Ta3N5 + 0.1667 BaN6 + 1.333 Ba	-0.21821289431036028	-0.4893274796103886	-0.8171095667348172
Ba(TbS2)2	0.623531777083338	2.4246767037499772	Ba(TbS2)2 + 2 Li -> Li2S + BaS + 2 TbS	0.5 Ba(TbS2)2 -> TbS2 + 0.5 Ba	-0.018654592837849204	-0.34739053065217007	-0.7750787458928556
Ba(TbTe2)2	0.5529847383333326	1.919886359999999	Ba(TbTe2)2 + 2 Li -> Li2Te + BaTe + 2 TbTe	Ba(TbTe2)2 -> TbTe3 + BaTe + Tb	-0.10268862379166199	-0.39668872352347684	-0.7740853349007826
Ba(TmS2)2	0.4554250020833397	2.509076268437585	Ba(TmS2)2 + 2 Li -> Li2S + BaS + 2 TmS	Ba(TmS2)2 -> Tm2S3 + 0.3333 BaS3 + 0.6667 Ba	-1.4283334952093694e-15	-0.3693394830434813	-0.7919531803373001
Ba(TmSe2)2	0.377578699583335	2.3386891855555523	Ba(TmSe2)2 + 2 Li -> Li2Se + BaSe + 2 TmSe	3 Ba(TmSe2)2 -> Tm2Se3 + 3 BaSe3 + 4 Tm	-0.011258482168845063	-0.29384886105064867	-0.668859290554515
Ba(TmTe2)2	0.43716840958333414	1.9000182603472189	Ba(TmTe2)2 + 2 Li -> Li2Te + BaTe + 2 TmTe	Ba(TmTe2)2 -> BaTe2 + 0.6667 TmTe3 + 1.333 Tm	-0.1011982714285713	-0.4284426189582573	-0.8260305605494502
Ba(YS2)2	0.5789965908333343	2.483726633472219	Ba(YS2)2 + 2 Li -> Li2S + BaS + 2 YS	3 Ba(YS2)2 -> Y2S3 + 3 BaS3 + 4 Y	-0.02189943581081666	-0.3462156779347869	-0.7716974743452365
Ba(YSe2)2	0.5381850458333499	2.3033360299305525	Ba(YSe2)2 + Li -> LiYSe2 + BaSe + YSe	3 Ba(YSe2)2 -> Y2Se3 + 3 BaSe3 + 4 Y	-0.024340739588542437	-0.2652737477897844	-0.6226689472744411
Ba(YTe2)2	0.534658664583338	1.8579949813888876	Ba(YTe2)2 + 2 Li -> Li2Te + BaTe + 2 YTe	Ba(YTe2)2 -> YTe3 + BaTe + Y	-0.10228297712500067	-0.3935630113495654	-0.7668767719841165
Ba10IBr4N5	0.04962257291668226	0.4084774843750084	Ba10IBr4N5 + 3 Li -> Li3N + 4 Ba2BrN + 0.5 BaI2 + 1.5 Ba	2 Ba10IBr4N5 -> BaN2 + 8 Ba2BrN + BaI2 + 2 Ba	-0.5928576183750001	-0.8655260443000001	-0.7429862728313226
Ba10Nd4Y(MoO6)5	1.2564418340333088	1.8303101034999574	2 Ba10Nd4Y(MoO6)5 + 50 Li -> BaY2O4 + 25 Li2O + 15 BaO + 4 BaNd2O4 + 10 Mo	2 Ba10Nd4Y(MoO6)5 -> Ba3Y2MoO9 + 9 BaMoO4 + Nd2O3 + 3 BaNd2O4 + 5 Ba	-0.3592298653684365	-0.4003150668636426	-0.12174534853624319
Ba10P6SO24	0.7167135402777796	2.447438967171061	0.04444 Ba10P6SO24 + 2 Li -> Li2O + 0.06667 Ba5P4 + 0.06667 BaO + 0.04444 BaS	1.333 Ba10P6SO24 -> BaSO4 + 0.1111 BaS3 + 4 Ba2P2O7 + 4.222 Ba	-0.08156594573033837	-0.18371235058460167	-0.16117298913406675
Ba11B26P2(H3O29)2	1.9738552424993365	3.636209333229198	0.2951 Ba11B26P2(H3O29)2 + 0.1967 Li -> Ba2B5HO10 + 0.1967 BaLi(B3O5)3 + 0.08197 Ba2B11H7O22 + 0.2951 Ba3(PO4)2 + 0.09836 H2	0.2857 Ba11B26P2(H3O29)2 -> BaB4O7 + 0.4286 BaB8H4O15 + 0.2857 Ba3(PO4)2 + 0.4286 O2 + 0.8571 Ba	-0.05303010183037671	-0.2135269950261156	-0.022298588710700784
Ba13Ca2Re9(ClO15)3	3.08954027791674	3.704821077354167	2.5 Ba13Ca2Re9(ClO15)3 + 0.6667 Li -> Ca5(ReO6)2 + 0.6667 LiReO4 + 0.6667 ReO3 + 0.5556 BaCl2 + 6.389 Ba5Re3ClO15	22.5 Ba13Ca2Re9(ClO15)3 -> Ca5(ReO6)2 + 57.5 Ba5Re3ClO15 + 5 Ba(ClO4)2 + 14 Re2O7 + 40 Ca	-0.30489780715661974	-0.2286827377991676	-0.04645897267045829
Ba13Dy8Zn4Pt4O37	2.0185069772967585	2.9269826173077	2.667 Ba13Dy8Zn4Pt4O37 + 27.33 Li -> Li6ZnO4 + 21.33 LiDyO2 + 9.667 Ba2ZnO3 + 3.833 Ba4PtO6 + 6.833 Pt	0.1538 Ba13Dy8Zn4Pt4O37 -> BaO2 + 0.3077 Dy2Pt2O7 + 0.6154 ZnO + 0.3077 Dy2O3 + Ba	-0.427558604391149	-0.41662197419177316	-0.1665933971076723
Ba13Si6(Sn4As11)2	0.8457996544047384	1.3140857787142883	3 Ba13Si6(Sn4As11)2 + 42 Li -> Ba3(SiAs2)2 + 14 Li3As + 12 Ba3(SnAs2)2 + 16 Si	0.75 Ba13Si6(Sn4As11)2 -> BaAs3 + 4.5 SiAs2 + 1.5 Sn4As3 + 8.75 Ba	-0.19347287388833	-0.43125317292507326	-1.0092115828214487
Ba16Nb5N19	0.39634338976191685	0.31778232124996947	0.2857 Ba16Nb5N19 + Li -> Ba2N + 0.1429 Li7NbN4 + 1.286 Ba2NbN3	0.5 Ba16Nb5N19 -> BaN2 + 2.5 Ba2NbN3 + 2 Ba	-0.5182585824506742	-0.7884106630395449	-0.8316544498149048
Ba16Re6O37	1.9577876083333479	2.9290768035714434	0.3333 Ba16Re6O37 + Li -> Ba2ReO5 + Ba2LiReO6 + 1.333 BaO	0.5 Ba16Re6O37 -> Ba5Re3O16 + 1.25 BaO2 + 1.75 Ba	-0.35573334826630276	-0.385918150157627	-0.12142327434201716
Ba17Er16Zn8Pt4O57	2.0984879919166586	2.8149851430952277	0.06667 Ba17Er16Zn8Pt4O57 + Li -> LiErO2 + 0.5333 Ba2ZnO3 + 0.01667 Ba4PtO6 + 0.03333 Er2O3 + 0.25 Pt	0.5 Ba17Er16Zn8Pt4O57 -> Ba5Pt2O9 + 1.75 BaO2 + 4 ZnO + 4 Er2O3 + 1.75 Ba	-0.3856663513417087	-0.4313907783928621	-0.16071211936175667
Ba17Ho16Zn8Pt4O57	2.0839279144998244	2.8439265316666553	0.2 Ba17Ho16Zn8Pt4O57 + Li -> LiHoO2 + 0.2 Ba8Ho3(Pt2O9)2 + 0.2 Ba2ZnO3 + 1.4 BaZnO2 + 0.8 Ho2O3	0.5 Ba17Ho16Zn8Pt4O57 -> Ba5Pt2O9 + 1.75 BaO2 + 4 ZnO + 4 Ho2O3 + 1.75 Ba	-0.3876572463960457	-0.4217985306109475	-0.15978860575586085
Ba17Tm16Zn8Pt4O57	2.159965255714404	2.7767614373809506	0.1429 Ba17Tm16Zn8Pt4O57 + Li -> LiTmO2 + 0.3214 Ba4PtO6 + 1.143 BaZnO2 + 0.6429 Tm2O3 + 0.25 Pt	0.5 Ba17Tm16Zn8Pt4O57 -> Ba5Pt2O9 + 1.75 BaO2 + 4 ZnO + 4 Tm2O3 + 1.75 Ba	-0.38312866742868135	-0.43078009914480075	-0.16191907576799958
Ba17Y16Zn8Pt4O57	2.077499566805675	2.8028237659523803	Ba17Y16Zn8Pt4O57 + 6 Li -> Li6ZnO4 + 2.5 Ba4PtO6 + 7 BaZnO2 + 8 Y2O3 + 1.5 Pt	0.5 Ba17Y16Zn8Pt4O57 -> Ba5Pt2O9 + 1.75 BaO2 + 4 ZnO + 4 Y2O3 + 1.75 Ba	-0.39234519639605825	-0.43573223388158455	-0.16127329178755057
Ba2Ag8S7	1.9302560183333561	2.2680674649999584	Ba2Ag8S7 + 2 Li -> BaAg8S5 + Li2S + BaS	0.6667 Ba2Ag8S7 -> BaS2 + 2.667 Ag2S + 0.3333 Ba	-0.011994893099997128	-0.15179872175382636	-0.6341577246464609
Ba2AlH7	0.6015712908333433	1.0079404224999866	0.5 Ba2AlH7 + 1.5 Li -> BaLiH3 + 0.5 LiH + 0.5 Al	Ba2AlH7 -> BaAlH5 + H2 + Ba	-0.19895375111603442	-0.4583292108570787	-0.962513819739601
Ba2As2O7	2.763231734791674	3.91096856624998	13 Ba2As2O7 + 12 Li -> Ba2As6O11 + 4 Li3AsO4 + 8 Ba3(AsO4)2	Ba2As2O7 -> Ba(AsO3)2 + 0.5 O2 + Ba	-0.29659116715773637	-0.18336124693394407	-0.03791120090580158
Ba2As2S5	1.751087104375003	2.5241824810937397	0.3333 Ba2As2S5 + 2 Li -> Li2S + 0.6667 BaS + 0.6667 As	Ba2As2S5 -> As2S3 + 0.6667 BaS3 + 1.333 Ba	-0.00046722938560028737	-0.18440301522057867	-0.7458475956869388
Ba2As2Se5	1.7032270358333363	2.3684943624999915	0.3333 Ba2As2Se5 + 2 Li -> Li2Se + 0.6667 BaSe + 0.6667 As	Ba2As2Se5 -> As2Se3 + 0.6667 BaSe3 + 1.333 Ba	0.0	-0.15641923026420224	-0.5975452949637674
Ba2As6O11	2.306373232647025	2.683611713750006	0.7059 Ba2As6O11 + 3 Li -> Li3AsO4 + 0.4706 Ba3(AsO4)2 + 2.294 As	2 Ba2As6O11 -> Ba2As2O7 + 5 As2O3 + 2 Ba	-0.2881797008384197	-0.21245888302942184	-0.31871625258866
Ba2B11H7O22	1.933826231666714	3.6766202452499046	3 Ba2B11H7O22 + 3 Li -> Ba3B6H2O13 + 3 BaLi(B3O5)3 + 1.5 H2 + 8 H2O	0.7273 Ba2B11H7O22 -> BaB8H4O15 + 0.2273 O2 + 0.5455 H2O + 0.4545 Ba	-0.02994553863240501	-0.18607042345311653	-0.017542090892853857
Ba2B2AsH3F18	3.517791551249987	7.033426211249961	6 Ba2B2AsH3F18 + 12 Li -> BaH6F8 + 6 AsF3 + 6 BaB2F8 + 12 LiHF2 + 5 BaF2	Ba2B2AsH3F18 -> BaBAsF10 + 0.5 BaH6F8 + BF3 + 0.5 F2 + 0.5 Ba	-0.13522446406908228	-0.005700357443189752	-0.15334578212306127
Ba2B2O5	1.135420929458312	3.430615466666648	1.15 Ba2B2O5 + Li -> BaLiBO3 + 0.25 Ba5B4O11 + 0.05 BaB6	Ba2B2O5 -> Ba(BO2)2 + 0.1 BaO10 + 0.9 Ba	-0.1379423784007887	-0.3062207532163721	-0.07400001396749456
Ba2B4Se13	1.8175916172333362	2.9514321329296576	0.7 Ba2B4Se13 + 5 Li -> Li2B2Se5 + 0.2 Ba7B4Se13 + 1.5 Li2Se	0.2 Ba2B4Se13 -> Se + 0.8 BSe2 + 0.4 Ba	-0.03943447188864546	-0.2129485911345339	-0.7812885292976786
Ba2B5BrO9	1.343931255407015	3.749758845208427	1.476 Ba2B5BrO9 + 1.214 Li -> Ba2Li(BO2)5 + 0.07586 B6O + 0.2138 BaLi(B3O5)3 + 0.7379 BaBr2	0.8 Ba2B5BrO9 -> BaB4O7 + 0.03333 Ba(BrO3)2 + 0.3667 BaBr2 + 0.2 Ba	-0.03737801774516569	-0.21186680847016204	-0.0523462928024081
Ba2B5ClO9	1.1523762531920454	3.9413059362500107	1.333 Ba2B5ClO9 + 2.24 Li -> Ba2Li(BO2)5 + 0.2067 Li6B4O9 + 0.6667 BaCl2 + 0.14 B6O	1.6 Ba2B5ClO9 -> BaB8O13 + 0.625 BaCl2 + 0.175 Ba(ClO4)2 + 1.4 Ba	-0.027871625252085863	-0.20785156626811818	-0.04288723028674246
Ba2B5HO10	1.8284154783335138	3.6139403660415965	Ba2B5HO10 + Li -> Ba2Li(BO2)5 + 0.5 H2	1.167 Ba2B5HO10 -> BaB4O7 + 0.1667 Ba2B11H7O22 + 0.5 O2 + Ba	-0.05208366071752746	-0.22273401187499875	-0.02795888012980985
Ba2B6PbO12	2.4059139861743004	3.1441445125002616	11.5 Ba2B6PbO12 + 11 Li -> B10(Pb2O7)3 + 11 Ba2Li(BO2)5 + BaB4O7 + 5.5 Pb	3 Ba2B6PbO12 -> Pb3O4 + Ba(BO2)2 + 4 BaB4O7 + Ba	-0.102190432878559	-0.23096037471015407	-0.04565193577583848
Ba2BN2Cl	0.1367728488888873	0.7900061554166705	Ba2BN2Cl + 3 Li -> Li3BN2 + 0.5 BaCl2 + 1.5 Ba	2 Ba2BN2Cl -> BaN2 + 2 BN + BaCl2 + 2 Ba	-0.40319129654166996	-0.6638905784615465	-0.7238192505424736
Ba2Bi2O5	1.5421869458333357	2.361580766250001	0.5 Ba2Bi2O5 + 3 Li -> BaO + 1.5 Li2O + Bi	3 Ba2Bi2O5 -> Bi2O3 + 4 BaBiO3 + 2 Ba	-0.4192456876571615	-0.43333670800925983	-0.14114077554983018
Ba2Br2O	0.13318917958331877	2.797124332499997	3 Ba2Br2O + 4 Li -> Ba4Br6O + 2 Li2O + 2 Ba	3 Ba2Br2O -> Ba4Br6O + BaO2 + Ba	-0.23874351205357014	-0.41765683750000315	-0.15370474556647196
Ba2BrN	0.017006074999998178	0.45740223125000234	Ba2BrN + 3 Li -> Li3N + 0.5 BaBr2 + 1.5 Ba	2 Ba2BrN -> BaN2 + BaBr2 + 2 Ba	-0.5871504943750003	-0.8644647484999983	-0.7387287491079895
Ba2Ca(BO2)6	1.3567160777082434	3.585630925625071	9.286 Ba2Ca(BO2)6 + 8.571 Li -> BaCaB2O5 + 8.571 Ba2Li(BO2)5 + 4.143 Ca2B2O5 + 0.4286 BaB6	Ba2Ca(BO2)6 -> Ca(BO2)2 + BaB4O7 + 0.5 O2 + Ba	-0.05792920626525788	-0.234895489438403	-0.03352984516928359
Ba2Ca(BO3)2	0.587980583083306	3.4379115541666687	0.9 Ba2Ca(BO3)2 + Li -> BaLiBO3 + 0.05 BaB6 + 0.25 Ba3(BO3)2 + 0.9 CaO	10 Ba2Ca(BO3)2 -> BaO10 + 10 BaCaB2O5 + 9 Ba	-0.1486883627899367	-0.3398913914492594	-0.07275154159442598
Ba2Ca(PdO2)3	2.160077420833347	2.691778425192311	Ba2Ca(PdO2)3 + 2 Li -> Li2PdO2 + Ba2PdO3 + CaO + Pd	6 Ba2Ca(PdO2)3 -> Ca4PdO6 + 5.5 Ba(PdO2)2 + 2 CaPd3O4 + 6.5 Ba	-0.5139191720833312	-0.3920737751041692	-0.15081739037893405
Ba2CaCo2CuF14	4.834751653333439	4.660721139999916	3 Ba2CaCo2CuF14 + 2 Li -> Ba2CaCu3F14 + 2 LiCaCoF6 + 4 CoF2 + 4 BaF2	4 Ba2CaCo2CuF14 -> Ba2CaCu3F14 + 8 CoF3 + 6 BaF2 + 3 CaF2 + Cu	-0.32288953764881834	-0.07972804435599112	-0.14409247663306513
Ba2CaCr2CuF14	3.589805808333353	4.730048017499965	0.5 Ba2CaCr2CuF14 + Li -> BaLiCrF6 + 0.5 CaF2 + 0.5 Cu	0.5 Ba2CaCr2CuF14 -> BaCrF6 + 0.5 CaF2 + 0.5 Cu	-0.14282089985576985	-0.08411355604162951	-1.817081992395822
Ba2CaGa2CuF14	3.5826608284722825	4.909200416250062	1.5 Ba2CaGa2CuF14 + 3 Li -> Li3GaF6 + 1.5 BaCaGaF7 + 0.5 BaGaF5 + BaF2 + 1.5 Cu	4 Ba2CaGa2CuF14 -> Ba2CaCu3F14 + 3 BaCaGaF7 + 3 BaGaF5 + 2 GaF3 + Cu	-0.15929727301687047	-0.08209289677078901	-0.10817907464743914
Ba2CaMgAl2F14	1.1053312283332912	6.141159103749963	Ba2CaMgAl2F14 + Li -> BaLiAlF6 + 0.3333 Ba3Al2F12 + MgF2 + CaF2 + 0.3333 Al	Ba2CaMgAl2F14 -> BaCaAlF7 + BaAlF5 + F2 + Mg	-0.03843653543479908	-0.08760254989582927	-0.04609357897059474
Ba2CaMnV2F14	2.2103079249999205	4.233497007500103	2 Ba2CaMnV2F14 + 3 Li -> Li3VF6 + 2 MnF2 + 4 BaF2 + 2 CaF2 + 3 VF2	Ba2CaMnV2F14 -> BaMnF5 + VF4 + CaVF5 + Ba	-0.11352004463297849	-0.0937728667708102	-0.19219543522726656
Ba2CaMoO6	1.2399427566666643	3.3606879399999507	0.3333 Ba2CaMoO6 + 2 Li -> Li2O + 0.6667 BaO + 0.3333 CaO + 0.3333 Mo	2 Ba2CaMoO6 -> BaO2 + 2 BaMoO4 + 2 CaO + Ba	-0.35253024869318406	-0.34571890861104837	-0.10622016921842592
Ba2CaP4(H3O8)2	2.2594585273958323	4.2026486049999034	1.375 Ba2CaP4(H3O8)2 + 3 Li -> BaCaP2(HO4)2 + 0.875 Ba2P2O7 + 0.375 CaP2(HO)4 + Li3PO4 + 2.375 H2O	Ba2CaP4(H3O8)2 -> BaP2(HO2)4 + CaP2H2O7 + 0.5 O2 + Ba	-0.04426108163772957	-0.13684929904255339	-0.052265299471298654
Ba2CaSi4(BO7)2	1.1854148969444083	3.7401089950000133	3.5 Ba2CaSi4(BO7)2 + 12 Li -> CaSiO3 + 1.25 Ca2B2O5 + 6 Li2SiO3 + 0.75 B6O + 7 BaSiO3	Ba2CaSi4(BO7)2 -> CaSi2(BO4)2 + 2 SiO2 + O2 + 2 Ba	-0.04389490390589934	-0.2301270056691911	-0.023174417943308434
Ba2CaTeO6	1.6547103189583316	3.536103054374996	0.25 Ba2CaTeO6 + 2 Li -> Li2O + 0.25 Ba2TeO + 0.25 CaO	1.5 Ba2CaTeO6 -> BaTeO4 + 0.5 Ca3TeO6 + O2 + 2 Ba	-0.3146654582386277	-0.29516032931819414	-0.07015599475805923
Ba2CaV2CoF14	2.7813515083333114	4.321922027499922	Ba2CaV2CoF14 + 2 Li -> LiVF4 + LiCaVF6 + 2 BaF2 + Co	0.5 Ba2CaV2CoF14 -> VF4 + BaF2 + 0.5 CaF2 + 0.5 Co	-0.13408971673557613	-0.09989424687500481	-0.19745818142238925
Ba2CaV2FeF14	2.3865923063333985	3.599997757500006	Ba2CaV2FeF14 + 2.5 Li -> LiCaVF6 + 0.5 Li3VF6 + 0.5 VF2 + 2 BaF2 + Fe	Ba2CaV2FeF14 -> BaFeF5 + CaVF5 + VF3 + 0.5 BaF2 + 0.5 Ba	-0.12390736580529271	-0.09366962177081462	-0.9937081899468154
Ba2CaWO6	1.0222689683333321	3.403446814375	0.3333 Ba2CaWO6 + 2 Li -> Li2O + 0.6667 BaO + 0.3333 CaO + 0.3333 W	3 Ba2CaWO6 -> Ca3WO6 + 2 BaWO4 + 2 O2 + 4 Ba	-0.3057195114204574	-0.33194179761362497	-0.06503358040578666
Ba2Cd(BO2)6	2.434743723583332	3.5838867974999995	6.333 Ba2Cd(BO2)6 + 6.667 Li -> Cd3(BO3)2 + 6 Ba2Li(BO2)5 + 0.6667 BaLi(B3O5)3 + 3.333 Cd	3 Ba2Cd(BO2)6 -> Cd3(BO3)2 + 4 BaB4O7 + O2 + 2 Ba	-0.11542916157154437	-0.22535324547059177	-0.031154615208310865
Ba2CdGe2O7	1.9139736714583377	3.5230643840384497	Ba2CdGe2O7 + 2 Li -> Li2GeO3 + Ba2GeO4 + Cd	2.667 Ba2CdGe2O7 -> BaGe4O9 + 1.333 Cd2GeO4 + 2.167 O2 + 4.333 Ba	-0.30560334829328717	-0.28317307993750584	-0.046838636130377864
Ba2CdMoO6	1.5145374158333296	2.952294260000047	Ba2CdMoO6 + 2 Li -> BaMoO4 + Li2O + BaO + Cd	2 Ba2CdMoO6 -> BaO2 + 2 BaMoO4 + 2 CdO + Ba	-0.41748809868750314	-0.30121738653404906	-0.09893578067981856
Ba2CdP4(H3O8)2	2.473389989583313	4.188773112499878	0.5 Ba2CdP4(H3O8)2 + Li -> LiP(HO2)2 + 0.5 Ba2P2O7 + 0.5 Cd + 0.5 H2O	1.333 Ba2CdP4(H3O8)2 -> BaCdP2O7 + 1.333 BaP2(HO2)4 + 0.3333 CdP2(H4O5)2 + 0.1667 O2 + 0.3333 Ba	-0.06949170107701486	-0.1328753957664237	-0.055167070273976826
Ba2CdS3	1.346942658333337	2.1891243149999977	Ba2CdS3 + 2 Li -> Li2S + 2 BaS + Cd	Ba2CdS3 -> BaS2 + CdS + Ba	-0.03409568300000121	-0.28362496517856517	-0.6816382049166783
Ba2CePbO6	2.088372192499964	3.2912745350000248	2.5 Ba2CePbO6 + 3 Li -> Ba2PbO4 + 2.5 BaCeO3 + 0.5 BaPb3O4 + 1.5 Li2O	2 Ba2CePbO6 -> BaO2 + 2 CeO2 + 2 BaPbO3 + Ba	-0.3964594842968818	-0.33653632541665734	-0.13671555285130577
Ba2CePtO6	2.0023252312500395	3.3365229862499985	4 Ba2CePtO6 + 12 Li -> Ba4PtO6 + 4 BaCeO3 + 6 Li2O + 3 Pt	Ba2CePtO6 -> PtO2 + CeO2 + O2 + 2 Ba	-0.4292852153906228	-0.3215727216666662	-0.10813688179738312
Ba2CoGe2O7	1.9983282614583318	3.4738578433471785	Ba2CoGe2O7 + 2 Li -> Li2GeO3 + Ba2GeO4 + Co	74 Ba2CoGe2O7 -> Co23O32 + 37 BaGe4O9 + 51 BaCoO3 + 60 Ba	-0.289566870809288	-0.2773907993124971	-0.04127888490405818
Ba2CoO4	1.9743859433333149	2.9422103400000723	Ba2CoO4 + Li -> LiCoO2 + 2 BaO	Ba2CoO4 -> BaCoO3 + 0.5 BaO2 + 0.5 Ba	-0.5260038216630489	-0.39606575095833607	-0.19337806470742702
Ba2CoSe2(ClO3)2	2.68833252183334	3.5996809709374165	4.4 Ba2CoSe2(ClO3)2 + 2 Li -> Li2Co3(SeO3)4 + 4.4 BaCl2 + 4.4 BaSeO3 + 0.2 CoSe2 + 1.2 CoO	2 Ba2CoSe2(ClO3)2 -> CoSe2O5 + CoSeO3 + BaSeO4 + 2 BaCl2 + Ba	-0.349885345677281	-0.16752793916015474	-0.12965136755143503
Ba2CoSi2O7	2.1061792070833265	3.2003954787499085	2 Ba2CoSi2O7 + 2 Li -> Li2CoSiO4 + 2 BaSiO3 + Ba2SiO4 + Co	3 Ba2CoSi2O7 -> Ba2Si3O8 + Co3O4 + 3 BaSiO3 + Ba	-0.15434199116896608	-0.2820761669375176	-0.04730887903227465
Ba2CrO4	1.8057995333333388	2.1648747699999786	Ba2CrO4 + Li -> LiCrO2 + 2 BaO	2 Ba2CrO4 -> Ba3Cr2O8 + Ba	-1.706148122333329	-0.4234544477438975	-1.9587506559750678
Ba2Cu(PO3)6	3.4195046495832657	4.60110137500005	1.5 Ba2Cu(PO3)6 + 3 Li -> Ba2Li3(PO3)7 + Ba(PO3)2 + 1.5 Cu	Ba2Cu(PO3)6 -> Ba(PO3)2 + BaP4O11 + 0.5 O2 + Cu	-0.10299505769050388	-0.13536930833333494	-0.13715669034214972
Ba2Cu2O5	2.5190465541666978	3.047054657499849	3 Ba2Cu2O5 + 3 Li -> Ba2(CuO2)3 + 2 Ba2CuO3 + Li3CuO3	1.5 Ba2Cu2O5 -> Ba2(CuO2)3 + 0.75 BaO2 + 0.25 Ba	-0.562270531971155	-0.3528542082352719	-0.15161402909420074
Ba2CuBrO2	1.4754786258333406	2.3574473474218793	2 Ba2CuBrO2 + 2 Li -> Ba2Br2O + Li2O + 2 BaO + 2 Cu	7 Ba2CuBrO2 -> Ba4Br6O + 1.833 Ba2(CuO2)3 + 0.5 Ba2Cu3(BrO2)2 + 5.333 Ba	-0.34140998962499713	-0.42936807843749936	-0.17324265762078994
Ba2CuClO2	1.4112488083333279	2.3384303403906412	6 Ba2CuClO2 + 6 Li -> Ba4Cl6O + 3 Li2O + 8 BaO + 6 Cu	3.818 Ba2CuClO2 -> Ba2(CuO2)3 + 0.2727 Ba2Cu3(ClO2)2 + 0.5455 Ba4Cl6O + 2.909 Ba	-0.3491600419999972	-2.2713712072222267	-0.1815938421014569
Ba2CuF6	3.554027438333267	5.868919375000004	0.5 Ba2CuF6 + Li -> LiF + BaF2 + 0.5 Cu	0.5 Ba2CuF6 -> BaF3 + 0.5 Cu	-0.20837974323467146	-0.12731414545454434	-0.12219479326923555
Ba2CuIO2	1.5459573158333422	2.3478771662499995	2 Ba2CuIO2 + 2 Li -> Ba2I2O + Li2O + 2 BaO + 2 Cu	6 Ba2CuIO2 -> Ba4I6O + CuO + 1.667 Ba2(CuO2)3 + 4.667 Ba	-0.3428275938749872	-0.460678572857145	-0.23436620397826902
Ba2CuMo2F14	3.690317787708345	4.265833332499965	0.75 Ba2CuMo2F14 + 2 Li -> Li2MoF6 + 1.5 BaF2 + 0.75 Cu + 0.5 MoF3	0.5 Ba2CuMo2F14 -> MoF6 + 0.5 CuF2 + Ba	-0.2948049371192507	-0.08458030447674592	-0.2606354181858319
Ba2DyBiO6	1.9572127520833464	3.407407125625003	Ba2DyBiO6 + 2 Li -> LiDyO2 + 0.5 Ba2Bi2O5 + BaO + 0.5 Li2O	Ba2DyBiO6 -> BiO2 + 1.25 O2 + 0.5 Dy2O3 + 2 Ba	-0.4093043403433607	-0.37240107040277914	-0.14074923060196443
Ba2DyCl7	0.6383914850000152	4.035457083333321	0.3333 Ba2DyCl7 + Li -> LiCl + 0.6667 BaCl2 + 0.3333 Dy	0.6667 Ba2DyCl7 -> Cl2 + 1.333 BaCl2 + 0.6667 Dy	-0.03985274365384939	-0.12380775644097297	-0.1020344844270813
Ba2DyTaO6	0.23210514944443106	3.3239844224999935	Ba2DyTaO6 + 9 Li -> LiDyO2 + 4 Li2O + 2 Ba + Ta	Ba2DyTaO6 -> DyTaO4 + O2 + 2 Ba	-0.15629966232953274	-0.346754383350695	-0.08486903777772614
Ba2ErCl7	0.6590306700000139	3.978817898333325	0.3333 Ba2ErCl7 + Li -> LiCl + 0.6667 BaCl2 + 0.3333 Er	0.6667 Ba2ErCl7 -> Cl2 + 1.333 BaCl2 + 0.6667 Er	-0.039263151249998796	-0.12862502098958428	-0.10758692725806362
Ba2ErTaO6	0.2234412616666559	3.3638081562499913	Ba2ErTaO6 + 9 Li -> LiErO2 + 4 Li2O + 2 Ba + Ta	Ba2ErTaO6 -> ErTaO4 + O2 + 2 Ba	-0.14877407746875182	-0.3531596028645807	-0.07706537748367293
Ba2Fe2O5	1.6192457228928312	2.7122993410713803	1.333 Ba2Fe2O5 + 5 Li -> Li5FeO4 + 2.667 BaO + 1.667 Fe	3 Ba2Fe2O5 -> Ba4Fe4O11 + Ba(FeO2)2 + Ba	-0.3886250194032024	-0.4009598123109215	-0.15330205690475207
Ba2Fe3P6HO22	3.1401599452084135	4.277216921249741	0.6667 Ba2Fe3P6HO22 + 2 Li -> LiFePO4 + 0.3333 Li2FeP2O7 + 0.3333 LiP(HO2)2 + 0.3333 Fe2P2O7 + 0.6667 Ba2P2O7	0.6667 Ba2Fe3P6HO22 -> BaFe2(P2O7)2 + 0.1667 O2 + 0.3333 H2O + 0.3333 Ba	-0.11493429520668652	-0.13675595234042937	-0.07131025606453179
Ba2FeGe2O7	1.7611604539583725	2.7980069827777543	Ba2FeGe2O7 + 2 Li -> Ba2GeO4 + Li2GeO3 + Fe	0.75 Ba2FeGe2O7 -> BaGeO3 + 0.125 BaGe4O9 + 0.375 Fe2O3 + 0.375 Ba	-0.2650425825240368	-0.28348147218747366	-0.06202473664729791
Ba2Ga2S5	1.3710704158333737	2.2230088262499663	2 Ba2Ga2S5 + Li -> LiGaS2 + 1.333 Ba3(GaS3)2 + 0.3333 Ga	2 Ba2Ga2S5 -> Ba2GaS4 + 1.5 Ba(GaS2)2 + 0.5 Ba	-0.0319425894067753	-0.18462991617645352	-0.7333567448568046
Ba2GaAsSe5	1.6800370933333226	2.27272123750004	2 Ba2GaAsSe5 + 6 Li -> Ba(GaSe2)2 + 3 Li2Se + 3 BaSe + 2 As	2 Ba2GaAsSe5 -> Ba2As2Se5 + Ba(GaSe2)2 + 0.3333 BaSe3 + 0.6667 Ba	-0.004844317431066614	-0.15174366075201462	-0.5767750010012891
Ba2GaBiS5	1.5994498216666664	2.3868758842708324	2 Ba2GaBiS5 + 6 Li -> Ba3(GaS3)2 + 3 Li2S + BaS + 2 Bi	3 Ba2GaBiS5 -> BaS3 + 1.5 Ba(BiS2)2 + 1.5 Ba(GaS2)2 + 2 Ba	-0.016435248093209065	-0.18879800536764924	-0.7189112717227757
Ba2GaBiSe5	1.5203411666666584	2.2183362262500155	2 Ba2GaBiSe5 + 6 Li -> Ba(GaSe2)2 + 3 Li2Se + 3 BaSe + 2 Bi	Ba2GaBiSe5 -> BaBiSe3 + 0.5 Ba(GaSe2)2 + 0.5 Ba	-0.007382112106248062	-0.15620716892274222	-0.49573792914019776
Ba2GaS4	1.8541423158333359	2.323028307250021	2 Ba2GaS4 + 2 Li -> Ba3(GaS3)2 + Li2S + BaS	2 Ba2GaS4 -> Ba(GaS2)2 + 1.333 BaS3 + 1.667 Ba	-0.02398493191326123	-0.2098373791071415	-0.747047941889071
Ba2Gd2Si4O13	0.9599340364584961	3.605168396249895	Ba2Gd2Si4O13 + 1.333 Li -> Gd2SiO5 + 0.6667 Li2SiO3 + 2 BaSiO3 + 0.3333 Si	2 Ba2Gd2Si4O13 -> BaSi2O5 + 2 BaGd2Si3O10 + 0.5 O2 + Ba	-0.08629834762244748	-0.2365131931140314	-0.04479781817368789
Ba2GdB2ClO6	0.8730106328333243	3.333055739722223	0.7037 Ba2GdB2ClO6 + 1.111 Li -> BaLiBO3 + 0.03704 Li3Gd(BO3)2 + 0.05556 BaB6 + 0.3519 BaCl2 + 0.3333 Gd2O3	5 Ba2GdB2ClO6 -> Ba2B5ClO9 + 0.75 Ba(ClO4)2 + 5 GdBO3 + 1.25 BaCl2 + 6 Ba	-0.12836519687630066	-0.26119640039583514	-0.07594848906626073
Ba2GdC2(O2F)3	2.1668876408333406	4.354038249999946	0.75 Ba2GdC2(O2F)3 + Li -> LiF + 0.75 GdOF + 1.25 BaCO3 + 0.25 BaF2 + 0.25 C	0.6667 Ba2GdC2(O2F)3 -> CO2 + 0.3333 BaCO3 + BaF2 + 0.5 O2 + 0.6667 Gd	-0.16028199908654184	-0.13523846935001682	-0.036723893658557216
Ba2GdCl7	0.6837512866666877	4.0548999649999855	2 Ba2GdCl7 + 3 Li -> Gd2Cl3 + 3 LiCl + 4 BaCl2	0.5 Ba2GdCl7 -> BaCl2 + 0.75 Cl2 + 0.5 Gd	-0.045712035069393586	-0.10265387809524418	-0.09218460943548745
Ba2GdMoO6	1.2293716150833238	1.9927358212499722	0.4 Ba2GdMoO6 + 2 Li -> Li2O + 0.2 BaGd2O4 + 0.6 BaO + 0.4 Mo	2 Ba2GdMoO6 -> BaGd2O4 + 2 BaMoO4 + Ba	-0.3491047627187358	-0.3478588100000142	-0.10681715318834506
Ba2GdTaO6	0.23887639755209222	3.4368340285714036	0.25 Ba2GdTaO6 + 2 Li -> Li2O + 0.125 BaGd2O4 + 0.375 Ba + 0.25 Ta	3 Ba2GdTaO6 -> Gd3TaO7 + 0.5 Ba5Ta4O15 + 0.35 BaO10 + 3.15 Ba	-0.17521238676138484	-0.32574988075000544	-0.09041685101318997
Ba2Ge(TeSe)2	1.5675476583333348	2.0453578024999985	Ba2Ge(TeSe)2 + 2 Li -> GeTe + BaTe + Li2Se + BaSe	2 Ba2Ge(TeSe)2 -> Ba2GeSe4 + BaTe3 + GeTe + Ba	-0.028697384347828425	-0.2088230686596635	-0.6142848561904801
Ba2Ge2Se5	1.56934243666667	2.2447023012499914	0.3333 Ba2Ge2Se5 + 2 Li -> Li2Se + 0.6667 BaSe + 0.6667 Ge	2 Ba2Ge2Se5 -> Ba2GeSe4 + 3 GeSe2 + 2 Ba	-0.009707014366670874	-0.1614921911140541	-0.6056531139922459
Ba2Ge2Te5	1.4892146245833313	2.0157977087499868	Ba2Ge2Te5 + 2 Li -> Li2Te + 2 BaTe + 2 GeTe	Ba2Ge2Te5 -> BaTe3 + 2 GeTe + Ba	-0.030894154257851136	-0.20738078532470583	-0.6789755186046063
Ba2GeAs2	0.7346460125000029	1.1513566510416606	0.5 Ba2GeAs2 + 3 Li + 1.5 Ge -> BaGe2 + Li3As	2 Ba2GeAs2 -> BaAs2 + Ba(GeAs)2 + 2 Ba	-0.24546926605676145	-0.5012291703284599	-0.9385936164292166
Ba2GeO4	0.9619480358333194	3.381973635416657	1.667 Ba2GeO4 + 3.333 Li -> Ba3GeO5 + 1.667 Li2O + 0.3333 BaGe2	10 Ba2GeO4 -> BaO10 + 10 BaGeO3 + 9 Ba	-0.3062293660000046	-0.35780412355555447	-0.10539001538588444
Ba2GeP2	0.6753567272916716	1.0246328458333365	0.6667 Ba2GeP2 + 2 Li -> BaLiP + 0.3333 BaGe2 + 0.3333 Li3P	2 Ba2GeP2 -> Ba(GeP)2 + 0.5 Ba3P4 + 1.5 Ba	-0.2580167924180352	-0.509291688131867	-1.3235468710526164
Ba2GeS4	1.6100930858333284	2.348913134687496	1.5 Ba2GeS4 + 2 Li -> Ba3GeS5 + Li2S + 0.5 Ge	Ba2GeS4 -> BaGeS3 + 0.3333 BaS3 + 0.6667 Ba	-0.024805389245293963	-0.2202270555416641	-0.7438430532762942
Ba2GeSe4	1.570632363333317	2.3598656968749934	2 Ba2GeSe4 + 2 Li -> Ba2Ge2Se5 + Li2Se + 2 BaSe	1.5 Ba2GeSe4 -> BaSe3 + 1.5 GeSe2 + 2 Ba	-0.0024325235212814267	-0.16570868237711744	-0.5567587437003061
Ba2H2Pd(S5O17)2	4.016468617961717	3.2470262871875053	1.231 Ba2H2Pd(S5O17)2 + 5.692 Li -> BaS4O13 + 0.07692 Pd16S7 + 2.231 Li2S2O7 + 0.6154 Li2H4(SO4)3 + 1.462 BaSO4	0.5 Ba2H2Pd(S5O17)2 -> BaS4O13 + 0.5 PdO2 + 0.5 H2SO4 + 0.5 O2 + 0.5 S	-0.3285147404659394	-0.0981163541999992	-0.18000563969788885
Ba2H3I	0.23072183333333407	0.8771979649999965	Ba2H3I + 0.6667 Li -> BaHI + 0.6667 BaLiH3 + 0.3333 Ba	Ba2H3I -> BaHI + H2 + Ba	-0.22469873710497534	-0.443211139440004	-0.789245506354155
Ba2H6Os	0.19118661083332977	1.268564558750007	0.5 Ba2H6Os + Li -> BaLiH3 + 0.5 Os	0.3333 Ba2H6Os -> H2 + 0.3333 Os + 0.6667 Ba	-0.16123971050000407	-0.3087208075764698	-0.7325335389097694
Ba2H6Pt	0.4697767199999965	1.315601719999997	0.5 Ba2H6Pt + 1.5 Li -> BaLiH3 + 0.5 LiPt	Ba2H6Pt -> Pt + 3 H2 + 2 Ba	-0.18346426780346148	-0.2975664161058784	-0.7376175609586466
Ba2H6Ru	0.992785166666661	1.3004673187500069	0.5 Ba2H6Ru + 3 Li + 1.5 H2 -> BaLiH3 + 0.5 Li4H6Ru	0.3333 Ba2H6Ru -> H2 + 0.3333 Ru + 0.6667 Ba	-0.16674942650001068	-0.3019394466941163	-0.72646600548872
Ba2H8PtO8	2.5602827670833372	3.499423606666659	0.25 Ba2H8PtO8 + Li -> LiHO + 0.5 Ba(HO)2 + 0.25 Pt	2 Ba2H8PtO8 -> Ba(H2O3)2 + 2 PtO2 + 6 H2O + 3 Ba	-0.2738178564814797	-0.21025751769230805	-0.06945601303469395
Ba2HfO4	0.19597900333335805	2.671544685000074	2 Ba2HfO4 + 2 Li -> Ba3Hf2O7 + Li2O + Ba	2 Ba2HfO4 -> Ba3Hf2O7 + 0.5 BaO2 + 0.5 Ba	-0.2623326860227335	-0.4293890198333319	-0.14270821232239062
Ba2HfS4	0.9444674033333342	2.261517852500022	Ba2HfS4 + 2 Li -> Li2S + 2 BaS + HfS	2 Ba2HfS4 -> BaS2 + 2 BaHfS3 + Ba	-0.01602426317568062	-0.3233470904347775	-0.7981323700091507
Ba2HgS5	1.9310170158333348	2.5147843187499936	Ba2HgS5 + 4 Li -> BaHgS2 + 2 Li2S + BaS	0.75 Ba2HgS5 -> BaS3 + 0.75 HgS + 0.5 Ba	-3.0985109573944403e-15	-0.1736385683333358	-0.7413496686805625
Ba2HoB2ClO6	0.8712159839583631	3.3515834008333387	2 Ba2HoB2ClO6 + 3.226 Li -> BaCl2 + 0.06452 Li6Ho(BO3)3 + 2.839 BaLiBO3 + 0.1613 BaB6 + 0.9677 Ho2O3	5 Ba2HoB2ClO6 -> Ba2B5ClO9 + 1.25 BaCl2 + 5 HoBO3 + 0.75 Ba(ClO4)2 + 6 Ba	-0.08330679804494512	-0.28404215857639903	-0.0590563668900872
Ba2HoCl7	0.6482999150000144	3.990548653333324	0.3333 Ba2HoCl7 + Li -> LiCl + 0.6667 BaCl2 + 0.3333 Ho	0.6667 Ba2HoCl7 -> Cl2 + 1.333 BaCl2 + 0.6667 Ho	-0.039592340480768984	-0.1274522748958341	-0.10465997062499777
Ba2HoTaO6	0.2248966283333209	3.3469727499999937	Ba2HoTaO6 + 9 Li -> LiHoO2 + 4 Li2O + 2 Ba + Ta	Ba2HoTaO6 -> HoTaO4 + O2 + 2 Ba	-0.1519756677187436	-0.3481522498437517	-0.08036404218955528
Ba2I2O	0.05230496708332488	2.357993146093754	3 Ba2I2O + 4 Li -> Ba4I6O + 2 Ba + 2 Li2O	3.182 Ba2I2O -> Ba4I6O + 0.1818 Ba5(IO6)2 + 1.455 Ba	-0.22262005133927554	-0.39749819750000315	-0.2539547923470271
Ba2In2O5	1.3693965616666721	2.7943081224999697	4 Ba2In2O5 + 5 Li -> Li5InO4 + 2.667 Ba3In2O6 + 1.667 In	Ba2In2O5 -> In2O3 + BaO2 + Ba	-0.4261220367434331	-0.4371370640196033	-0.1697874171735636
Ba2In2S5	1.4455764733333263	2.2005097399999674	0.6667 Ba2In2S5 + Li -> LiInS2 + 1.333 BaS + 0.3333 In	2 Ba2In2S5 -> BaS2 + 2 Ba(InS2)2 + Ba	-0.03277769209744941	-0.19392871110293974	-0.7194943437236931
Ba2In2Si3SO10	2.0958571058333746	2.3639281105466847	Ba2In2Si3SO10 + Li -> InS + LiInSiO4 + 2 BaSiO3	0.6667 Ba2In2Si3SO10 -> BaSi2O5 + 0.5088 In2O3 + 0.1579 Ba(InS2)2 + 0.03509 BaSO4 + 0.1404 Ba	-0.1607191581250058	-0.24657241859166446	-0.306245065318163
Ba2InBiS5	1.6253632341666628	2.2896830219271167	Ba2InBiS5 + 3 Li -> LiInS2 + Li2S + 2 BaS + Bi	2 Ba2InBiS5 -> Ba(BiS2)2 + Ba(InS2)2 + 0.6667 BaS3 + 1.333 Ba	-0.021647301209139158	-0.1973591426838226	-0.713654858457615
Ba2InBiSe5	1.5252260133333324	2.221622122500014	Ba2InBiSe5 + 3 Li -> LiInSe2 + Li2Se + 2 BaSe + Bi	Ba2InBiSe5 -> BaBiSe3 + 0.5 Ba(InSe2)2 + 0.5 Ba	-0.008965197352935661	-0.15820578412599473	-0.45784446701058457
Ba2InBrO3	1.3060979891666573	2.8684585612500006	2 Ba2InBrO3 + 6 Li -> Ba2Br2O + 3 Li2O + 2 BaO + 2 In	6 Ba2InBrO3 -> Ba4Br6O + 4 BaO2 + 3 In2O3 + 4 Ba	-0.36814099009615386	-0.42498847115385185	-0.16602513925111717
Ba2InClO3	1.254683536666655	2.9163596150000037	6 Ba2InClO3 + 18 Li -> Ba4Cl6O + 9 Li2O + 8 BaO + 6 In	6 Ba2InClO3 -> Ba4Cl6O + 4 BaO2 + 3 In2O3 + 4 Ba	-0.3671759350000099	-0.42060133615384565	-0.16772784910470762
Ba2InGaO5	1.446112446222202	2.808486941000035	3.667 Ba2InGaO5 + 5 Li -> Ba2In2O5 + 1.333 Ba4Ga2O7 + Li5GaO4 + 1.667 In	1.6 Ba2InGaO5 -> BaO2 + 0.8 In2O3 + 0.4 Ba3Ga4O9 + Ba	-0.3763941412499996	-0.3974748683823903	-0.1457824641644887
Ba2InO3F	1.3071671049999902	2.715440809999999	2 Ba2InO3F + 6 Li -> BaF2 + 3 Li2O + 3 BaO + 2 In	2 Ba2InO3F -> Ba2In2O5 + 0.5 BaO2 + BaF2 + 0.5 Ba	-0.38653568153845175	-0.43159981615383947	-0.18285582973537817
Ba2La3Si3O12F	0.7642225012500417	3.4126137891666137	2.667 Ba2La3Si3O12F + 4 Li -> Li4SiO4 + 2 Ba2SiO4 + 1.333 BaF2 + 4 La2SiO5 + Si	0.6667 Ba2La3Si3O12F -> La2Si2O7 + 0.3333 BaF2 + 0.5 O2 + Ba	-0.09561842176402546	-0.30729550225409863	-0.08226971884722811
Ba2LaAg5S6	1.7976324146666816	2.3710485641666588	2 Ba2LaAg5S6 + 10 Li -> La2S3 + 5 Li2S + 4 BaS + 10 Ag	2 Ba2LaAg5S6 -> BaS3 + 2 LaS2 + 5 Ag2S + 3 Ba	-0.0009279861486506391	-0.22758375809523734	-0.6842799318531732
Ba2LaBiO6	1.9814467120833275	3.3371886999999973	2 Ba2LaBiO6 + 4 Li -> BaLa2O4 + Ba2Bi2O5 + BaO + 2 Li2O	2 Ba2LaBiO6 -> La2Bi2O7 + 2.5 O2 + 4 Ba	-0.4262499711766954	-0.3937783774027781	-0.15374081343973023
Ba2LaC3O9F	2.1414393158332503	4.056914354999984	1.5 Ba2LaC3O9F + 2 Li -> Li2CO3 + 3 BaCO3 + 1.5 LaOF + 0.5 C	2 Ba2LaC3O9F -> Ba3La2C5O15F2 + CO2 + 0.5 O2 + Ba	-0.14820668450893315	-0.17318000640804598	-0.013316573839279755
Ba2LaNbO6	0.5246697018333704	2.887807828750024	2 Ba2LaNbO6 + 2.5 Li -> BaLa2O4 + 0.75 Ba4Nb2O9 + 1.25 Li2O + 0.5 Nb	2 Ba2LaNbO6 -> Ba3Nb2O8 + 0.5 BaO2 + La2O3 + 0.5 Ba	-0.2398982918859156	-0.39995159660586976	-0.12966791961986246
Ba2LaTaO6	0.27908067633334177	3.1209584878571097	2 Ba2LaTaO6 + 10 Li -> BaLa2O4 + 5 Li2O + 3 BaO + 2 Ta	3 Ba2LaTaO6 -> La3TaO7 + 1.75 BaO2 + 0.5 Ba5Ta4O15 + 1.75 Ba	-0.19936289723216927	-0.3881756633506903	-0.12191700119882398
Ba2Li(BO2)5	1.0461187620606003	3.76991042270834	0.5534 Ba2Li(BO2)5 + 2.136 Li -> BaLiBO3 + 0.2816 Li6B4O9 + 0.1068 BaB6	0.6667 Ba2Li(BO2)5 -> Ba(BO2)2 + 0.3333 BaB4O7 + 0.1667 O2 + 0.6667 Li	-0.04816786784176852	-0.2354709446551757	-0.03449872351911898
Ba2Li3(PO3)7	2.5861913594666213	4.641606024583291	0.2143 Ba2Li3(PO3)7 + 0.3571 Li -> LiPO3 + 0.2143 Ba2P2O7 + 0.07143 P	2 Ba2Li3(PO3)7 -> Ba(PO3)2 + 3 BaP4O11 + 1.5 O2 + 6 Li	-0.0521702106140749	-0.14386164332812368	-0.11326524904031388
Ba2LiAl(CN2)4	1.6247805933333606	2.157322728333357	0.6667 Ba2LiAl(CN2)4 + 1.333 Li -> Li2CN2 + 1.333 BaCN2 + 0.3333 C + 0.6667 AlN	0.5 Ba2LiAl(CN2)4 -> BaCN2 + 0.75 N2 + C + 0.5 AlN + 0.5 Li	-0.03843309200000533	-0.40737290276444726	-0.6186582037135695
Ba2LiIO6	2.1648814355208295	3.993844967708353	2 Ba2LiIO6 + 16 Li -> Ba2I2O + 9 Li2O + 2 BaO	8 Ba2LiIO6 -> Ba(IO3)2 + 3 Ba5(IO6)2 + 3 O2 + 8 Li	-0.5700271726785697	-0.2175913621250003	-0.07757889791667161
Ba2LiReN4	0.08674936583331505	2.4736884783333677	Ba2LiReN4 + 4 Li -> Li5ReN4 + 2 Ba	2 Ba2LiReN4 -> Ba2ReN3 + BaReN3 + BaN2 + 2 Li	-0.24984298894349388	-0.5602964134449993	-0.6182850581599983
Ba2LiReO6	1.2305640883333366	3.7623063183333594	0.25 Ba2LiReO6 + 1.75 Li -> Li2O + 0.5 BaO + 0.25 Re	3 Ba2LiReO6 -> Ba5Re3O16 + BaO2 + 3 Li	-0.2976817730113628	-0.3150790715277587	-0.07776541653595759
Ba2LuB2ClO6	0.9487033374374825	3.3697206341666655	38 Ba2LuB2ClO6 + 60 Li -> Li6B4O9 + 54 BaLiBO3 + 19 BaCl2 + 3 BaB6 + 19 Lu2O3	5 Ba2LuB2ClO6 -> Ba2B5ClO9 + 5 LuBO3 + 1.25 BaCl2 + 0.75 Ba(ClO4)2 + 6 Ba	-0.07764657375617912	-0.2892859705555444	-0.0584241165853685
Ba2LuBiO6	1.9687069270833493	3.424507967343752	Ba2LuBiO6 + 2 Li -> LiLuO2 + 0.5 Ba2Bi2O5 + BaO + 0.5 Li2O	Ba2LuBiO6 -> BiO2 + 1.25 O2 + 0.5 Lu2O3 + 2 Ba	-0.39785955108047233	-0.37288184918055167	-0.1326504896295786
Ba2LuTaO6	0.22322414611109864	3.4106900650000007	Ba2LuTaO6 + 9 Li -> LiLuO2 + 4 Li2O + 2 Ba + Ta	Ba2LuTaO6 -> LuTaO4 + O2 + 2 Ba	-0.1386588774687354	-0.34409146432291626	-0.06790987821894756
Ba2Mg(BO3)2	1.0815417159583305	3.2908512243749954	4.6 Ba2Mg(BO3)2 + 4 Li -> Ba5B4O11 + 4 BaLiBO3 + 0.2 BaB6 + 4.6 MgO	1.5 Ba2Mg(BO3)2 -> Ba(BO2)2 + 0.5 Mg3(BO3)2 + O2 + 2 Ba	-0.1332257645318622	-0.3337087679710664	-0.07691924038491926
Ba2Mg(PO4)2	1.4599588832895432	3.8087905918750398	1.541 Ba2Mg(PO4)2 + 2.092 Li -> Ba3(PO4)2 + 0.02752 Ba3P14 + 0.6972 Li3PO4 + 1.541 MgO	3 Ba2Mg(PO4)2 -> Mg3(PO4)2 + O2 + 2 Ba2P2O7 + 2 Ba	-0.06626103161972008	-0.17695493384433747	-0.014132436699992645
Ba2Mg3H10	0.5207157558082178	0.9711293625000069	49.67 Ba2Mg3H10 + 299 Li -> LiMg149 + 99.33 BaLiH3 + 198.7 LiH	3 Ba2Mg3H10 -> Ba6Mg7H26 + 2 H2 + 2 Mg	-0.23033807121185434	-0.49482491478857416	-0.9609741453775473
Ba2MgGe2O7	1.492601661770894	3.540351787976174	1.5 Ba2MgGe2O7 + 2 Li -> Li2MgGeO4 + 1.5 Ba2GeO4 + 0.5 MgO + 0.5 Ge	Ba2MgGe2O7 -> MgGeO3 + 0.25 BaGe4O9 + 0.875 O2 + 1.75 Ba	-0.23790118848957675	-0.29865328931247515	-0.05135047422133798
Ba2MgH6	1.8101932394834428	0.9031167931250077	0.9933 Ba2MgH6 + Li + 0.9933 BaMg149 -> LiMg149 + 2.98 BaH2	7 Ba2MgH6 -> Ba6Mg7H26 + 8 H2 + 8 Ba	-0.2479181721233621	-0.49836918507428485	-0.935597952091842
Ba2MgMoO6	1.2664856633333332	3.2014304999999834	0.3333 Ba2MgMoO6 + 2 Li -> Li2O + 0.6667 BaO + 0.3333 MgO + 0.3333 Mo	2 Ba2MgMoO6 -> BaO2 + 2 BaMoO4 + 2 MgO + Ba	-0.329813295968751	-0.3201714088068801	-0.08933248325893128
Ba2MgSi2O7	0.7047740252084078	3.5502206282499986	1.5 Ba2MgSi2O7 + 2 Li -> Li2MgSiO4 + 0.5 MgO + 1.5 Ba2SiO4 + 0.5 Si	2 Ba2MgSi2O7 -> BaMg2Si2O7 + 0.6667 Ba2Si3O8 + 0.8333 O2 + 1.667 Ba	-0.08106398015626048	-0.30177184456250217	-0.04775504958333121
Ba2MgWO6	1.0655414599999995	3.5150820749999916	0.3333 Ba2MgWO6 + 2 Li -> Li2O + 0.6667 BaO + 0.3333 MgO + 0.3333 W	Ba2MgWO6 -> MgWO4 + O2 + 2 Ba	-0.2831938254687527	-0.3127874807954436	-0.05863834222559028
Ba2Mn(AsO4)2	2.310704088333347	3.2595286401563324	Ba2Mn(AsO4)2 + 0.9231 Li -> MnO + 0.6154 Ba3(AsO4)2 + 0.3077 Li3AsO4 + 0.07692 Ba2As6O11	6 Ba2Mn(AsO4)2 -> Mn2O3 + 2 Mn2AsO5 + 5 Ba2As2O7 + 2 Ba	-0.29100756104661585	-0.1935212889344331	-0.09378386466928657
Ba2Mn(BO2)6	1.8741999036904278	2.627194033750173	4 Ba2Mn(BO2)6 + 3.5 Li -> Mn3(BO3)2 + 3.5 Ba2Li(BO2)5 + BaB4O7 + 0.5 Mn2B	3 Ba2Mn(BO2)6 -> Mn3O4 + Ba(BO2)2 + 4 BaB4O7 + Ba	-0.06410840343935487	-0.22835749405881867	-0.07353068728028944
Ba2Mn(PO4)2	1.7432319724073793	3.3195605605468903	2 Ba2Mn(PO4)2 + 3 Li -> Li3PO4 + 0.3333 Mn2P + 1.333 MnO + 1.333 Ba3(PO4)2	6 Ba2Mn(PO4)2 -> BaMn3(PO4)3 + 1.5 Mn2O3 + 4.5 Ba2P2O7 + 2 Ba	-0.09020892281170623	-0.1691639820990547	-0.08889756761906487
Ba2Mn2CuF14	4.9196759012501445	6.452188043124998	12 Ba2Mn2CuF14 + 16 Li -> Ba2CuF6 + Ba6Cu11F34 + 16 BaMnF5 + 8 Li2MnF6	Ba2Mn2CuF14 -> MnCuF6 + MnF4 + 2 F2 + 2 Ba	-0.332606375925141	-0.06457565369186025	-0.18490813709944787
Ba2Mn2Se2OF2	1.4163316118678235	2.450685503749988	Ba2Mn2Se2OF2 + 2 Li -> MnO + 2 BaSe + 2 LiF + Mn	Ba2Mn2Se2OF2 -> MnO + MnSe2 + BaF2 + Ba	-0.05851740780336678	-0.18816030894924252	-0.3979887656797394
Ba2Mn3(SeO3)6	3.2469968031862493	3.630919890249996	4.25 Li + 3 Mn3Se3O10 + 0.25 Li5Mn5(SeO3)8 -> Mn2O3 + 2.75 Li2Mn3(SeO3)4	2.333 Ba2Mn3(SeO3)6 -> Mn3Se3O10 + 4 MnSe2O5 + 3 BaSeO4 + 1.667 Ba	-0.41551616661521296	-0.16133895955445876	-0.14613861922948645
Ba2MnGe2O7	1.5077412162500132	3.0196394417460386	1.333 Ba2MnGe2O7 + 2 Li -> Li2MnGeO4 + 1.333 Ba2GeO4 + 0.3333 MnGe	8 Ba2MnGe2O7 -> BaMn8O16 + 5.333 BaGeO3 + 2.667 BaGe4O9 + 7 Ba	-0.24808503056404252	-0.2870831118125139	-0.07737919954998418
Ba2MnMoO6	1.2719158612500119	2.245705081666697	Ba2MnMoO6 + 6 Li -> Ba2MnO3 + 3 Li2O + Mo	5 Ba2MnMoO6 -> Mn3O4 + 2 BaMnO3 + 5 BaMoO4 + 3 Ba	-0.35166790160410244	-0.29615281562495843	-0.11592871993182641
Ba2MnO3	1.0528382131178216	1.515184093000011	Ba2MnO3 + 2 Li -> Li2O + 2 BaO + Mn	8 Ba2MnO3 -> Ba8Mn8O21 + 3 BaO + 5 Ba	-0.4286182583749927	-0.5517114976785664	-0.24190371016257517
Ba2MnS3	1.324549634367818	2.060857959999992	Ba2MnS3 + 2 Li -> Li2S + 2 BaS + Mn	Ba2MnS3 -> MnS2 + BaS + Ba	-0.04612434886363803	-0.29117553852555433	-0.7269556057671316
Ba2MnSe3	1.376323359367822	2.211502087499994	Ba2MnSe3 + 2 Li -> Li2Se + 2 BaSe + Mn	2 Ba2MnSe3 -> BaSe2 + 2 MnSe2 + 3 Ba	-0.03880067818181776	-0.19129965421993012	-0.5167777901572754
Ba2MnTe3	1.3931282893678212	1.9047479624999895	Ba2MnTe3 + 2 Li -> Li2Te + 2 BaTe + Mn	Ba2MnTe3 -> MnTe2 + BaTe + Ba	-0.05824476197580264	-0.2879098466244445	-0.6221816349982778
Ba2MnTeO6	1.7349404304761569	2.954129377142872	Ba2MnTeO6 + 7 Li -> LiMnO2 + 3 Li2O + Ba2TeO	8 Ba2MnTeO6 -> BaMn8O16 + 8 BaTeO4 + 7 Ba	-0.3292313195586365	-0.267246864241073	-0.08615274551139063
Ba2MnTeSe2	1.402159776867835	1.951220225000006	2 Ba2MnTeSe2 + 2 Li -> Ba2MnSe3 + Li2Se + 2 BaTe + Mn	6 Ba2MnTeSe2 -> BaTe2 + 4 Ba2MnSe3 + 2 MnTe2 + 3 Ba	-0.0549144596919513	-0.22251630926333354	-0.5643351852839256
Ba2MnWO6	3.086787964583344	2.834724909499983	Li + 0.6667 BaMn6O12 -> LiMn2O4 + 0.6667 Mn2O3 + 0.6667 BaMnO3	6 Ba2MnWO6 -> BaMn6O12 + 6 BaWO4 + 5 Ba	-0.31075910092228654	-0.2900414753409253	-0.09731555698862948
Ba2NCl	0.033999420000009994	0.4319122137500016	Ba2NCl + 3 Li -> Li3N + 1.5 Ba + 0.5 BaCl2	2 Ba2NCl -> BaN2 + BaCl2 + 2 Ba	-0.5935233348437494	-0.865177118999999	-0.7254510719538732
Ba2Na2SrAl4F20	1.390342946333395	6.217094664051659	0.75 Ba2Na2SrAl4F20 + 1.25 Li -> BaNaAlF6 + 0.5 BaAlF5 + 0.75 SrLiAlF6 + 0.1667 Na3Li3Al2F12 + 0.4167 Al	Ba2Na2SrAl4F20 -> SrAlF5 + NaAlF4 + 2 BaAlF5 + 0.5 F2 + Na	-0.03602541232493639	-0.07416651377192762	-0.05214150912185578
Ba2NaReO6	1.1886079311904627	3.2966323974999825	5 Ba2NaReO6 + 28 Li -> Na5ReO6 + 14 Li2O + 10 BaO + 4 Re	Ba2NaReO6 -> NaReO4 + O2 + 2 Ba	-0.30299272244316455	-0.32513970555554916	-0.09023178434637247
Ba2Nb2TeO10	2.5318845616666295	4.045251998660753	3 Ba2Nb2TeO10 + 6 Li -> Ba5Nb4O15 + BaNb2O6 + 3 Li2TeO3	Ba2Nb2TeO10 -> TeO3 + Nb2O5 + O2 + 2 Ba	-0.2427874493854607	-0.19587444996843306	-0.014985330211505055
Ba2NbCrO6	1.1196383933333651	2.757043080555567	1.333 Ba2NbCrO6 + Li -> LiCrO2 + 0.6667 Ba4Nb2O9 + 0.3333 Cr	2.857 Ba2NbCrO6 -> Cr2O3 + 0.7143 Ba5Nb4O15 + 0.8571 BaCrO4 + 1.286 Ba	-1.5756074204707762	-0.3110693907031443	-1.7053863295832201
Ba2NbFeO6	1.6061849118749683	3.3478215341666564	4 Ba2NbFeO6 + 6 Li -> Li5FeO4 + Ba4NbFeO8 + Ba4LiNb3O12 + 2 Fe	4 Ba2NbFeO6 -> Ba5Nb4O15 + 2 Fe2O3 + 1.5 O2 + 3 Ba	-0.2508586093582914	-0.3124150825781271	-0.06370797407304796
Ba2NbN3	0.21881589804763224	1.0733434132812465	0.5 Ba2NbN3 + 2.5 Li -> Ba + 0.3571 Li7NbN4 + 0.07143 Nb2N	2 Ba2NbN3 -> Ba(NbN2)2 + 0.3333 BaN6 + 2.667 Ba	-0.38964560337500576	-0.672184318003644	-0.7943318843390945
Ba2NbP2O9F	2.15141374709261	4.00895443250009	3 Ba2NbP2O9F + 7.013 Li -> Ba5P3O12F + 2.338 Li3PO4 + 0.6623 NbP + BaF2 + 0.1948 Nb12O29	2 Ba2NbP2O9F -> Ba2P2O7 + 2 NbPO5 + BaF2 + 0.5 O2 + Ba	-0.09236378022923786	-0.14951247989284888	-0.0506757334259218
Ba2NbRhO6	2.665065127888769	2.3805506652899235	90 Ba2NbRhO6 + 30 Li -> Ba3(RhO2)14 + 30 Ba4LiNb3O12 + 6.333 Ba9(RhO3)8 + 25.33 Rh	18.67 Ba2NbRhO6 -> Ba3(RhO2)14 + 4.667 Ba5Nb4O15 + 0.5833 Ba9(RhO3)8 + 5.75 Ba	-0.3468455827667598	-0.29768909979165903	-0.0812063126123812
Ba2Nd2Si4O13	1.1180135108334317	3.5655781024999427	1.5 Ba2Nd2Si4O13 + 2 Li -> Li2SiO3 + 1.5 Nd2SiO5 + 3 BaSiO3 + 0.5 Si	Ba2Nd2Si4O13 -> BaSi2O5 + Nd2Si2O7 + 0.5 O2 + Ba	-0.07917696844717437	-0.2862088753654941	-0.04698082522989955
Ba2NdBiO6	1.981992347708326	3.4294417027777757	2 Ba2NdBiO6 + 4 Li -> BaNd2O4 + Ba2Bi2O5 + BaO + 2 Li2O	Ba2NdBiO6 -> NdBiO4 + 0.2 BaO10 + 1.8 Ba	-0.4249350114544783	-0.3956887724166629	-0.15099149248816524
Ba2NdGaSe5	1.260400593958328	2.1108229043750146	0.6667 Ba2NdGaSe5 + 2 Li -> Li2Se + 0.3333 Nd2Se3 + 1.333 BaSe + 0.6667 Ga	10 Ba2NdGaSe5 -> Nd10Se19 + 5 Ba(GaSe2)2 + 11 BaSe + 4 Ba	-0.016069514664178497	-0.21213522535708407	-0.5563213196428314
Ba2NdInSe5	1.3446000281249977	2.052228587187543	0.6667 Ba2NdInSe5 + 2 Li -> Li2Se + 0.3333 Nd2Se3 + 1.333 BaSe + 0.6667 In	10 Ba2NdInSe5 -> Nd10Se19 + 5 Ba(InSe2)2 + 11 BaSe + 4 Ba	-0.019955232133027412	-0.21194939910708266	-0.5128145187499866
Ba2NdMoO6	1.280495194583326	1.7371179237499936	0.4 Ba2NdMoO6 + 2 Li -> Li2O + 0.2 BaNd2O4 + 0.6 BaO + 0.4 Mo	2 Ba2NdMoO6 -> BaNd2O4 + 2 BaMoO4 + Ba	-0.3842402992105365	-0.40620167772726745	-0.14291272586233106
Ba2NdTaO6	0.26135424098958837	3.2603552907142714	0.25 Ba2NdTaO6 + 2 Li -> Li2O + 0.125 BaNd2O4 + 0.375 Ba + 0.25 Ta	1.714 Ba2NdTaO6 -> BaO2 + 0.5714 Nd3TaO7 + 0.2857 Ba5Ta4O15 + Ba	-0.19314769633927398	-0.3901900759895831	-0.11023029537577855
Ba2Ni(PO4)2	2.650842058750012	3.6884401475000006	1.5 Ba2Ni(PO4)2 + 3 Li -> Ba3(PO4)2 + Li3PO4 + 1.5 Ni	2 Ba2Ni(PO4)2 -> BaNi2(PO4)2 + 0.5 O2 + Ba2P2O7 + Ba	-0.15369211890276713	-0.16850868780660355	-0.0309610308999968
Ba2NiMoO6	1.6334357058333318	2.9312705599999567	Ba2NiMoO6 + 2 Li -> BaMoO4 + Li2O + BaO + Ni	2 Ba2NiMoO6 -> BaNiO3 + 2 BaMoO4 + NiO + Ba	-0.42229381155243306	-0.291471505625041	-0.1056768387061533
Ba2NiTeO6	1.838906038666656	3.442666795416664	0.7 Ba2NiTeO6 + 3 Li -> BaO + 0.5 Li6TeO6 + 0.2 Ba2TeO + 0.7 Ni	3 Ba2NiTeO6 -> Ni3O4 + 3 BaTeO4 + O2 + 3 Ba	-0.4206100701358624	-0.2680865159090664	-0.07405620937851642
Ba2NiWO6	1.7786195633333466	3.438465021666656	3 Ba2NiWO6 + 6 Li -> Ba5Li2(WO5)3 + 2 Li2O + BaO + 3 Ni	3 Ba2NiWO6 -> Ni3O4 + 3 BaWO4 + O2 + 3 Ba	-0.3801571903427394	-0.28685575215908043	-0.061434988845411986
Ba2P2O7	1.819105656333382	4.288293508750007	1.5 Ba2P2O7 + 1.875 Li -> Ba3(PO4)2 + 0.625 Li3PO4 + 0.375 P	Ba2P2O7 -> Ba(PO3)2 + 0.5 O2 + Ba	-0.06054329673206338	-0.15403491898148447	-0.034964662065215535
Ba2P7Br	0.8672397149999851	1.6202451361111114	0.6667 Ba2P7Br + 5 Li -> BaP3 + 1.667 Li3P + 0.3333 BaBr2	2 Ba2P7Br -> BaBr2 + 14 P + 3 Ba	-0.06868770550936532	-0.2581056670634938	-1.198353586733412
Ba2P7I	0.8637453443750016	1.6317822331944511	2 Ba2P7I + 24 Li -> BaP3 + 8 Li3P + Ba3P3I2	2 Ba2P7I -> BaI2 + 14 P + 3 Ba	-0.06724588686182731	-0.2661908698412683	-1.198036187207436
Ba2PCl	0.0	0.9048174800000027	Li -> Li	4 Ba2PCl -> Ba3P4 + 2 BaCl2 + 3 Ba	-0.2966047273141865	-0.5422611241997151	-1.1516383667948795
Ba2PIO4	0.7140790855208311	3.3890958622727414	Ba2PIO4 + 8 Li -> BaLiP + 3.5 Li2O + 0.5 Ba2I2O	12 Ba2PIO4 -> Ba(IO3)2 + 6 Ba2P2O7 + 10 I + 11 Ba	-0.05837973789062367	-0.16591195317454255	-0.17477420272178046
Ba2PbO4	1.9660084008333207	2.917741324999997	0.6 Ba2PbO4 + 1.2 Li -> BaO + 0.2 BaPb3O4 + 0.6 Li2O	Ba2PbO4 -> BaPbO3 + 0.5 BaO2 + 0.5 Ba	-0.5167945145192347	-0.42926889983332694	-0.18183759874521854
Ba2PdF6	3.9982884733332655	4.646946515000031	0.5 Ba2PdF6 + Li -> LiF + BaF2 + 0.5 Pd	1.5 Ba2PdF6 -> PdF3 + 3 BaF2 + 0.5 Pd	-0.3102496044886589	-0.11668372515150405	-0.17635143617646998
Ba2PrBiO6	2.0003012620833243	3.3885592124999775	2 Ba2PrBiO6 + 4 Li -> BaPr2O4 + Ba2Bi2O5 + BaO + 2 Li2O	Ba2PrBiO6 -> PrBiO4 + 0.2 BaO10 + 1.8 Ba	-0.4297721583989107	-0.39646069451388977	-0.15597016190311486
Ba2PrNbO6	0.5086628683333188	2.9408750562500563	2 Ba2PrNbO6 + 10 Li -> BaPr2O4 + 3 BaO + 5 Li2O + 2 Nb	2 Ba2PrNbO6 -> Ba3Nb2O8 + 0.5 BaO2 + Pr2O3 + 0.5 Ba	-0.23788592066724856	-0.4001940813280913	-0.1274184939052434
Ba2PrTaO6	0.26934942833334397	3.189181882142821	2 Ba2PrTaO6 + 10 Li -> BaPr2O4 + 5 Li2O + 3 BaO + 2 Ta	3 Ba2PrTaO6 -> Pr3TaO7 + 1.75 BaO2 + 0.5 Ba5Ta4O15 + 1.75 Ba	-0.19454539383888836	-0.38815298640624096	-0.11118949954252066
Ba2Re6S11	1.5363445736111223	1.971911683125012	0.1111 Ba2Re6S11 + 2 Li -> Li2S + 0.2222 BaS + 0.6667 Re	2 Ba2Re6S11 -> Re + 11 ReS2 + 4 Ba	-0.031819609441062546	-0.15245629270627514	-0.7059930596910013
Ba2Sc2O5	0.4186297608333427	2.618160968333294	Ba2Sc2O5 + 2 Li -> BaO + 2 LiScO2 + Ba	2 Ba2Sc2O5 -> BaO2 + 2 BaSc2O4 + Ba	-0.2967207047115217	-0.45455814681034745	-0.17536079578179242
Ba2ScNbO6	0.4547112183333404	3.433772005208341	0.5 Ba2ScNbO6 + 2.5 Li -> BaO + 0.5 LiScO2 + Li2O + 0.5 Nb	2 Ba2ScNbO6 -> BaNb2O6 + Sc2O3 + 1.5 O2 + 3 Ba	-0.1710980310089374	-0.3303790119531258	-0.058427019085269816
Ba2ScO3F	0.22956188499999908	2.8395280441666433	Ba2ScO3F + 3 Li -> Li2O + LiScO2 + 0.5 BaF2 + 1.5 Ba	2 Ba2ScO3F -> BaO2 + BaSc2O4 + BaF2 + Ba	-0.27328084240627515	-0.43605650934210605	-0.1748410395326565
Ba2ScTaO6	0.2418575894444308	3.4808655587499957	Ba2ScTaO6 + 9 Li -> LiScO2 + 4 Li2O + 2 Ba + Ta	Ba2ScTaO6 -> ScTaO4 + O2 + 2 Ba	-0.12772281484796189	-0.32317020735293944	-0.05660040853652948
Ba2Si3O8	1.2439283314583127	3.5599848212499685	0.5 Ba2Si3O8 + 0.6667 Li -> BaSiO3 + 0.3333 Li2SiO3 + 0.1667 Si	0.6667 Ba2Si3O8 -> BaSi2O5 + 0.1667 O2 + 0.3333 Ba	-0.07220740900424882	-0.2646227189189183	-0.03773176019232105
Ba2Si5N8	0.7674950693560376	1.164176542812511	15 Ba2Si5N8 + 22 Li -> Ba3Si4 + 27 BaSiN2 + 22 LiSi2N3	7 Ba2Si5N8 -> BaN6 + 5 BaSi7N10 + 8 Ba	-0.1830540212499976	-0.4994228842857027	-0.794165400273982
Ba2SiO4	0.25946766333333937	3.3851382708333215	0.25 Ba2SiO4 + 2 Li -> Li2O + 0.25 Ba2Si	10 Ba2SiO4 -> BaO10 + 10 BaSiO3 + 9 Ba	-0.1680301510227311	-0.3603729795000028	-0.0908447322906607
Ba2SiS4	1.3142988977083248	2.5427728703124983	1.5 Ba2SiS4 + 2 Li -> Ba3SiS5 + Li2S + 0.5 Si	1.5 Ba2SiS4 -> BaS3 + 1.5 SiS2 + 2 Ba	-1.2604128435400596e-15	-0.28894486021738963	-0.8105073302976282
Ba2SiSe4	1.392046942083336	2.40898440625	0.5 Ba2SiSe4 + 2 Li -> Li2Se + BaSe + 0.5 Si	1.5 Ba2SiSe4 -> BaSe3 + 1.5 SiSe2 + 2 Ba	-0.0007997483729655919	-0.20572499789847742	-0.6972697194413968
Ba2SiTe4	1.4906080570833358	2.085069899374991	0.5 Ba2SiTe4 + 2 Li -> Li2Te + BaTe + 0.5 Si	1.5 Ba2SiTe4 -> BaTe3 + 1.5 SiTe2 + 2 Ba	-0.07413647009018698	-0.3258778143930423	-0.8385573941369104
Ba2SmGaSe5	1.2956468249999866	2.1452830524999986	2 Ba2SmGaSe5 + 6 Li -> Ba(SmSe2)2 + 3 Li2Se + 3 BaSe + 2 Ga	2 Ba2SmGaSe5 -> Ba(SmSe2)2 + BaSe2 + Ba(GaSe2)2 + Ba	-0.013844388306251343	-0.20572324488089322	-0.5625460773511701
Ba2SmMoO6	1.2531766540833247	1.8737106262500043	0.4 Ba2SmMoO6 + 2 Li -> Li2O + 0.2 BaSm2O4 + 0.6 BaO + 0.4 Mo	2 Ba2SmMoO6 -> BaSm2O4 + 2 BaMoO4 + Ba	-0.3563734542105461	-0.3892388743181816	-0.1192142751448877
Ba2SmTaO6	0.25743950942708804	3.325117622142835	0.25 Ba2SmTaO6 + 2 Li -> Li2O + 0.125 BaSm2O4 + 0.375 Ba + 0.25 Ta	3 Ba2SmTaO6 -> Sm3TaO7 + 1.75 BaO2 + 0.5 Ba5Ta4O15 + 1.75 Ba	-0.18542165705359803	-0.37630299036458315	-0.10492811155228665
Ba2SnO4	1.1480380208333303	3.005471089999972	3 Ba2SnO4 + 14 Li -> BaSn3 + 7 Li2O + 5 BaO	2 Ba2SnO4 -> Ba3Sn2O7 + 0.5 BaO2 + 0.5 Ba	-0.3583605273332977	-0.42556383900002537	-0.13645993331416983
Ba2SnS3F2	1.8205915720833001	2.626142134374993	Ba2SnS3F2 + 2 Li -> BaS + BaSnS2 + 2 LiF	3 Ba2SnS3F2 -> BaS3 + 3 SnS2 + 3 BaF2 + 2 Ba	-0.027957498794640046	-0.15954729465275697	-0.6607076779741463
Ba2SnS4	1.7840177920832572	2.338296407500004	4 Ba2SnS4 + 2 Li -> Ba8Sn4S15 + Li2S	6 Ba2SnS4 -> BaS3 + 3 Ba3Sn2S7 + 2 Ba	-0.025812853632055877	-0.23649642133333115	-0.7423622789926748
Ba2SnSe3F2	1.8858797335833453	2.463701318124994	6 Ba2SnSe3F2 + 10 Li -> Ba6Sn6Se13 + 5 BaSe + 10 LiF + BaF2	Ba2SnSe3F2 -> SnSe2 + 0.3333 BaSe3 + BaF2 + 0.6667 Ba	-0.032703459765615506	-0.14553806303239036	-0.4458166943212163
Ba2SnSe4	1.6768207080833095	2.162480843750002	6 Ba2SnSe4 + 10 Li -> Ba6Sn6Se13 + 5 Li2Se + 6 BaSe	1.333 Ba2SnSe4 -> Ba2SnSe5 + 0.3333 SnSe + 0.6667 Ba	-0.012837073249999609	-0.1697715799572409	-0.523470754689431
Ba2SnSe5	1.7962688045833213	2.418001178749992	Ba2SnSe5 + 2 Li -> Ba2SnSe4 + Li2Se	Ba2SnSe5 -> SnSe2 + BaSe3 + Ba	-0.0002943453255215278	-0.16040264814971394	-0.5208815301711354
Ba2SrTeO6	1.6676659802083231	3.3914798943749958	Ba2SrTeO6 + 8 Li -> Ba2TeO + 4 Li2O + SrO	Ba2SrTeO6 -> SrTeO4 + O2 + 2 Ba	-0.33974480323863165	-0.3226071170454592	-0.09021354177344865
Ba2SrWO6	1.0531167750000043	3.4208982689236103	0.5 Ba2SrWO6 + 3 Li -> BaO + 1.5 Li2O + 0.5 SrO + 0.5 W	7 Ba2SrWO6 -> Sr7W4O19 + 3 Ba2WO5 + 0.8 BaO10 + 7.2 Ba	-0.33436990051136695	-0.3623124239772926	-0.09449250752977267
Ba2Ta2O7	1.843385788333677	3.4166595820833554	6 Ba2Ta2O7 + Li -> Ba4LiTa3O12 + Ba3Ta5O15 + Ba5Ta4O15	Ba2Ta2O7 -> BaTa2O6 + 0.5 O2 + Ba	-0.12129152543589239	-0.2881981051923064	-0.04993049170137276
Ba2Ta6Te2O21	2.5224402736537925	3.7504438437499794	0.5 Ba2Ta6Te2O21 + 2.167 Li -> BaTa2O6 + 0.1667 LiTe3 + 0.5 Li2TeO3 + LiTaO3	Ba2Ta6Te2O21 -> BaTeO4 + 0.5 Ta2Te2O9 + 2.5 Ta2O5 + Ba	-0.1297949140988397	-0.2095917297930061	-0.07985674707446577
Ba2TaBiO6	2.188479058333283	2.6044774600000986	9 Ba2TaBiO6 + 3 Li -> Bi2O3 + 3 Ba2Bi2O5 + 3 Ba4LiTa3O12 + Bi	2 Ba2TaBiO6 -> BaBiO3 + 0.5 Bi2O3 + 0.5 Ba5Ta4O15 + 0.5 Ba	-0.2592256890060751	-0.34547145730902384	-0.08969184696902932
Ba2TaCrO6	0.9909014400000196	2.8805196027777997	2 Ba2TaCrO6 + 1.5 Li -> Ba4Ta2O9 + 1.5 LiCrO2 + 0.5 Cr	4 Ba2TaCrO6 -> Ba5Ta4O15 + 1.4 Cr2O3 + 1.2 BaCrO4 + 1.8 Ba	-1.5370487040568133	-0.31094310286760996	-1.7089518558332903
Ba2TaFeO6	1.5306752964166934	3.4025816555555655	2 Ba2TaFeO6 + 3.75 Li -> Ba4Ta2O9 + 0.75 Li5FeO4 + 1.25 Fe	6 Ba2TaFeO6 -> Ba3Ta6Fe2O21 + 2 Fe2O3 + 4.5 O2 + 9 Ba	-0.2093539158463642	-0.3121590127941536	-0.06108575409416783
Ba2TaInO6	1.2385084600000833	3.39557857916669	2 Ba2TaInO6 + 6 Li -> Ba4Ta2O9 + 3 Li2O + 2 In	2 Ba2TaInO6 -> In2O3 + 0.5 Ba5Ta4O15 + 0.75 O2 + 1.5 Ba	-0.22321705330723773	-0.30948993330881613	-0.06234999175722189
Ba2TaN3	0.20718404583334116	1.055337961718747	Ba2TaN3 + 4 Li -> Li4TaN3 + 2 Ba	2 Ba2TaN3 -> Ba(TaN2)2 + 0.3333 BaN6 + 2.667 Ba	-0.404013687750024	-0.6833501958695476	-0.8305591883520971
Ba2TaTlO6	2.64338065374983	3.2275705983334086	3.6 Ba2TaTlO6 + 1.2 Li -> Ba2Tl2O5 + 0.2 Tl4O3 + 0.4 BaTl2O4 + 1.2 Ba4LiTa3O12	2 Ba2TaTlO6 -> Tl2O3 + 0.75 BaO2 + 0.5 Ba5Ta4O15 + 0.75 Ba	-0.3167786780338595	-0.311367006250002	-0.10426158495535631
Ba2TbBiO6	1.9304191489583307	3.418651975781263	2 Ba2TbBiO6 + 4 Li -> BaTb2O4 + Ba2Bi2O5 + BaO + 2 Li2O	Ba2TbBiO6 -> BiO2 + 1.25 O2 + 0.5 Tb2O3 + 2 Ba	-0.4073232383989196	-0.3773938063472193	-0.139875534490721
Ba2TbCl7	0.6612518083333434	4.058664800833321	2 Ba2TbCl7 + 3 Li -> Tb2Cl3 + 3 LiCl + 4 BaCl2	0.5 Ba2TbCl7 -> BaCl2 + 0.75 Cl2 + 0.5 Tb	-0.0401795327403891	-0.12650517630207758	-0.09882651705645018
Ba2TbNbO6	0.4476349430833202	3.408935597222215	2 Ba2TbNbO6 + 10 Li -> BaTb2O4 + 3 BaO + 5 Li2O + 2 Nb	5 Ba2TbNbO6 -> BaO10 + 5 TbNbO4 + 9 Ba	-0.20711810309967582	-0.37071617570312476	-0.09864743949344934
Ba2TbTaO6	0.23343773499998854	3.307195726249992	Ba2TbTaO6 + 9 Li -> LiTbO2 + 4 Li2O + 2 Ba + Ta	Ba2TbTaO6 -> TbTaO4 + O2 + 2 Ba	-0.16098341526787507	-0.3570263386979198	-0.08815676915037685
Ba2TbWO6	1.0692315410833477	1.9090174946875047	2 Ba2TbWO6 + 10 Li -> BaTb2O4 + 5 Li2O + 3 BaO + 2 W	1.333 Ba2TbWO6 -> Ba2WO5 + 0.3333 Tb2WO6 + 0.3333 Tb2O3 + 0.6667 Ba	-0.31773233896873965	-0.3603328474478884	-0.11750117136717186
Ba2TeO	0.21810396583333236	1.7119337608333287	Ba2TeO + 2 Li -> BaTe + Li2O + Ba	3 Ba2TeO -> BaTeO3 + 2 BaTe + 3 Ba	-0.34022225781249826	-0.4779015034374994	-0.4846328753421574
Ba2TeP2O9	2.8021976883332957	3.888034792499871	4.75 Ba2TeP2O9 + 3 Li -> BaTe4O9 + Li3PO4 + 4.25 Ba2P2O7 + 0.75 Te	4 Ba2TeP2O9 -> Te2O5 + 0.5 Te4P2O13 + 3.5 Ba2P2O7 + Ba	-0.13352848844936283	-0.16721614066627244	-0.11088920465907837
Ba2Ti(GeO4)2	2.0460362777082013	3.4855295079166932	2 Ba2Ti(GeO4)2 + 1.333 Li -> BaTi2O5 + 3 BaGeO3 + 0.6667 Li2GeO3 + 0.3333 Ge	2 Ba2Ti(GeO4)2 -> BaTi2O5 + BaGe4O9 + O2 + 2 Ba	-0.23988655084995436	-0.27280689837837935	-0.043308540071134605
Ba2Ti(SiO4)2	1.2694496583331494	3.599617821458347	2 Ba2Ti(SiO4)2 + Li -> LiTi2O4 + 4 BaSiO3	39 Ba2Ti(SiO4)2 -> Ba4Ti13O30 + 26 BaTi(SiO3)3 + 24 O2 + 48 Ba	-0.09787417154759215	-0.2710186039189195	-0.03387176057696495
Ba2TiO4	0.14356403333335174	3.21116662000006	Ba2TiO4 + 4 Li -> Li4TiO4 + 2 Ba	Ba2TiO4 -> BaTiO3 + 0.5 BaO2 + 0.5 Ba	-0.22838696950004245	-0.39163923934210665	-0.1149792187500509
Ba2TiS4	1.3216283933333217	2.358523956999993	Ba2TiS4 + Li -> LiTiS2 + 2 BaS	Ba2TiS4 -> TiS3 + 0.3333 BaS3 + 1.667 Ba	-0.01149428735848712	-0.27483559206519237	-0.7844769625992185
Ba2Tl(HO)7	2.6278675270833247	3.2611470156080973	1.333 Ba2Tl(HO)7 + 2 Li -> BaH4O3 + 0.3333 Tl4O3 + 1.667 Ba(HO)2 + 2 LiHO	2.8 Ba2Tl(HO)7 -> Ba(H8O5)2 + 0.9 Ba(H2O3)2 + 1.4 Tl2O3 + 3.7 Ba	-0.24142336391926822	-0.24242480129998834	-0.09577019104896145
Ba2Tl2O5	2.1486357624583547	2.8954660949999704	1.75 Ba2Tl2O5 + 5 Li -> Li5TlO4 + 1.25 Tl2O + 3.5 BaO	2 Ba2Tl2O5 -> BaO2 + 2 BaTl2O4 + Ba	-0.5725182772916662	-0.4097975769117608	-0.17645894763965764
Ba2TmTaO6	0.2221771144444331	3.384238487499993	Ba2TmTaO6 + 9 Li -> LiTmO2 + 4 Li2O + 2 Ba + Ta	Ba2TmTaO6 -> TmTaO4 + O2 + 2 Ba	-0.14455047346874128	-0.35042459619791533	-0.07305575125815178
Ba2V(SiO4)2	2.300474117499963	2.5523296600000487	0.5882 Ba2V(SiO4)2 + 0.3529 Li -> BaSiO3 + 0.05882 Ba3V2O8 + 0.1765 Li2SiO3 + 0.2353 V2O3	2 Ba2V(SiO4)2 -> BaSi2O5 + Ba2V2O7 + 2 SiO2 + Ba	-0.16176579226196264	-0.26193774516500135	-0.08117291632343271
Ba2V2CuF12	3.5276258083333385	4.2346616387500635	0.5 Ba2V2CuF12 + Li -> LiVF4 + BaF2 + 0.5 Cu	0.6667 Ba2V2CuF12 -> VF4 + 0.3333 Ba2VCu2F12 + 0.6667 Ba	-0.17496735265218977	-0.0961637736585308	-0.22239694761682083
Ba2V2O7	2.362103540937527	3.8920680924999336	1.5 Ba2V2O7 + 1.2 Li -> Ba3V2O8 + 0.3 V2O3 + 0.4 Li3VO4	2 Ba2V2O7 -> Ba3V4O13 + 0.5 O2 + Ba	-0.28103045102498614	-0.18685254128048134	-0.016811595760882536
Ba2V3BiO11	2.480103163333146	3.9469681799999763	6 Ba2V3BiO11 + 4.2 Li -> V3(Bi3O8)2 + 1.4 Li3VO4 + 6 Ba2V2O7 + 0.8 V2O3	2 Ba2V3BiO11 -> Ba3V4O13 + 2 VBiO4 + 0.5 O2 + Ba	-0.3138211223219258	-0.18870815617948455	-0.030111566831382497
Ba2V3P6HO22	2.2310476543333273	3.8650708889285585	0.75 Ba2V3P6HO22 + 4.375 Li -> LiVPO4 + 0.75 LiVPHO5 + 0.75 Ba2P2O7 + 0.875 Li3PO4 + 0.125 V4P3	0.4 Ba2V3P6HO22 -> VP2O7 + 0.2 VPO5 + 0.1 BaP2(HO2)4 + 0.7 Ba	-0.08330165174815463	-0.13834099420210855	-0.16298959494303844
Ba2V4Cd3O15	2.6930131683333194	3.6540516768749933	0.6667 Ba2V4Cd3O15 + Li -> VCdO3 + 0.3333 Li3VO4 + 0.6667 Ba2V2O7 + CdO	0.6667 Ba2V4Cd3O15 -> V2Cd2O7 + 0.3333 Ba2V2O7 + 0.3333 O2 + 0.6667 Ba	-0.3611808509837964	-0.18545598458332013	-0.02812323847221654
Ba2VCu2F12	3.814071378333182	5.14222361750008	3 Ba2VCu2F12 + 2 Li -> Li2VF6 + 0.875 Ba2CuF6 + 0.375 Ba6Cu11F34 + Ba2V2CuF12	Ba2VCu2F12 -> VF5 + 0.2812 Ba2CuF6 + 0.1563 Ba6Cu11F34 + 0.5 Ba	-0.2801488479333445	-0.08766399243900036	-0.1900362330131582
Ba2VN3	0.2140670610357277	1.1750791977499975	0.5 Ba2VN3 + 2.5 Li -> Ba + 0.3571 Li7VN4 + 0.07143 V2N	3 Ba2VN3 -> BaN6 + 3 VN + 5 Ba	-0.3546590821875055	-0.6507172178048002	-0.6518818310114951
Ba2VO4	0.787185277708335	1.0265050174999748	0.5 Ba2VO4 + 2 Li -> Li2O + BaO + 0.5 V	2 Ba2VO4 -> Ba3V2O8 + Ba	-0.33438412516665483	-0.4041246436666346	-0.18320682633928165
Ba2VP2O9	2.589204708125056	3.8235812787500265	2 Ba2VP2O9 + 2 Li -> Ba2P2O7 + 0.6667 Li3PO4 + V2O3 + 0.6667 Ba3(PO4)2	2 Ba2VP2O9 -> VPO5 + Ba2P2O7 + BaVPO6 + Ba	-0.12513649501952262	-0.15669314843749738	-0.07640301900509971
Ba2WO5	1.264071366249914	3.42413177361112	5 Ba2WO5 + 2 Li -> Ba5Li2(WO5)3 + 1.667 Ba3WO6 + 0.3333 W	Ba2WO5 -> BaWO4 + 0.1 BaO10 + 0.9 Ba	-0.3423470276041689	-0.30800201500000934	-0.07414607029043463
Ba2YB2ClO6	0.8751813500083063	3.3436129076388745	2 Ba2YB2ClO6 + 3.226 Li -> BaCl2 + 2.839 BaLiBO3 + 0.06452 Li6Y(BO3)3 + 0.1613 BaB6 + 0.9677 Y2O3	4 Ba2YB2ClO6 -> Ba3Y2(B2O5)3 + 2 YBO3 + 1.625 BaCl2 + 0.375 Ba(ClO4)2 + 3 Ba	-0.09295821476756405	-0.2929962226389802	-0.05956152695125905
Ba2YBiO6	1.9765347683333285	3.3970743270312638	2 Ba2YBiO6 + 4 Li -> BaY2O4 + Ba2Bi2O5 + BaO + 2 Li2O	Ba2YBiO6 -> BiO2 + 1.25 O2 + 0.5 Y2O3 + 2 Ba	-0.41185474451004556	-0.38289691868055087	-0.14120520018511007
Ba2YC2(O2F)3	2.1494295008334245	4.090180733124972	0.6 Ba2YC2(O2F)3 + 0.8 Li -> BaCO3 + 0.6 YOF + 0.8 LiF + 0.2 BaF2 + 0.2 C	0.5 Ba2YC2(O2F)3 -> CO2 + 0.5 YF3 + 0.5 O2 + Ba	-0.12962820062499603	-0.15879829417613545	-0.016068258557695003
Ba2YTaO6	0.22727106861109925	3.3321081062499935	Ba2YTaO6 + 9 Li -> LiYO2 + 4 Li2O + 2 Ba + Ta	Ba2YTaO6 -> YTaO4 + O2 + 2 Ba	-0.16096760539773936	-0.35967640536459955	-0.08327725566993571
Ba2YbMoO6	1.2226803316666668	3.4250146527777727	0.3333 Ba2YbMoO6 + 2 Li -> Li2O + 0.6667 BaO + 0.3333 YbO + 0.3333 Mo	Ba2YbMoO6 -> BaMoO4 + YbO + 0.1 BaO10 + 0.9 Ba	-0.32735735005681743	-0.3444975224999407	-0.09513887135617427
Ba2Zn(BO3)2	3.7369322433333387	3.3311289412500167	Li + BaO10 -> LiO8 + BaO2	Ba2Zn(BO3)2 -> Ba(BO2)2 + ZnO + 0.5 O2 + Ba	-0.20064708104686613	-0.2832602934601307	-0.06578270768729633
Ba2Zn2TeP2O11	2.6371479151784905	3.0675198035417095	7.5 Ba2Zn2TeP2O11 + 21 Li -> Ba3Te4O11 + 4 Ba3(PO4)2 + 11.5 ZnO + 7 Li3PO4 + 3.5 ZnTe	8.333 Ba2Zn2TeP2O11 -> Ba2TeP2O9 + 1.333 BaTe4O9 + 5.333 BaZn2(PO4)2 + 2 Ba3Zn3Te(PO7)2 + 2 Ba	-0.2077775962787074	-0.1741026132369723	-0.09455978580128388
Ba2Zn3(PO3)10	2.717964458270863	4.571224648749987	1.05 Ba2Zn3(PO3)10 + 3 Li -> Ba2Li3(PO3)7 + 0.1 BaZnP2O7 + 1.4 Zn2P2O7 + 0.25 ZnP2	0.5 Ba2Zn3(PO3)10 -> BaP4O11 + 0.5 Zn(PO3)2 + 0.5 O2 + Zn	-0.09634771887520799	-0.13260246202811476	-0.13353291041277426
Ba2Zn7F18	2.408861173333328	6.04924143499996	0.5 Ba2Zn7F18 + 5 Li -> BaZnF4 + 5 LiF + 2.5 Zn	0.5 Ba2Zn7F18 -> BaF3 + 3 ZnF2 + 0.5 Zn	-0.19850122629163658	-0.07858705774508445	-0.12348051367468327
Ba2ZnAs2	0.5189168090476208	1.041072300000002	13 Ba2ZnAs2 + 28 Li -> BaZn13 + Li3As + 25 BaLiAs	2 Ba2ZnAs2 -> Ba3(ZnAs2)2 + Ba	-0.2593366283991241	-0.5058670589823082	-0.8580631828798219
Ba2ZnGe2O7	1.586752880833332	3.5782959944230694	Ba2ZnGe2O7 + 1.5 Li -> Ba2GeO4 + 0.75 Li2ZnGeO4 + 0.25 Ge + 0.25 Zn	2.667 Ba2ZnGe2O7 -> BaGe4O9 + 1.333 Zn2GeO4 + 2.167 O2 + 4.333 Ba	-0.28520867832073327	-0.2706320155624953	-0.042349954204604856
Ba2ZnGe2S6O	1.657983668511913	2.571516828288683	Ba2ZnGe2S6O + 1.667 Li -> Ba2GeS4 + 0.25 Li4GeS4 + 0.3333 Li2GeO3 + ZnS + 0.4167 Ge	1.333 Ba2ZnGe2S6O -> BaGe2S5 + 0.6667 GeS2 + 1.333 ZnS + 0.3333 BaSO4 + 1.333 Ba	-0.04742140110991366	-0.1781199620380447	-0.6896803220524581
Ba2ZnMoO6	1.435188649305557	2.7726484099999698	3 Ba2ZnMoO6 + 6 Li -> BaZnO2 + Ba2ZnO3 + 3 BaMoO3 + Li6ZnO4	2 Ba2ZnMoO6 -> BaO2 + 2 BaMoO4 + 2 ZnO + Ba	-0.4009149035200905	-0.2920213774999927	-0.11083496067982601
Ba2ZnN2	0.259385619393945	0.33024123062499994	1.111 Ba2ZnN2 + 3.667 Li -> Ba2N + 0.2222 BaZn5 + 1.222 Li3N	5 Ba2ZnN2 -> BaZn5 + 5 BaN2 + 4 Ba	-0.5922586496022717	-0.887630790336537	-0.8073175901423504
Ba2ZnO3	1.161978563779746	2.6229075441666394	13 Ba2ZnO3 + 28 Li -> BaZn13 + 14 Li2O + 25 BaO	2 Ba2ZnO3 -> BaO2 + 2 BaZnO2 + Ba	-0.47178374776042853	-0.5374662519642874	-0.21679713363636655
Ba2ZnS3	1.1775818370833364	2.179190803392854	Ba2ZnS3 + 2 Li -> Li2S + 2 BaS + Zn	Ba2ZnS3 -> BaS2 + ZnS + Ba	-0.03528364179286725	-0.28513828589285817	-0.7014465647976219
Ba2ZnSi2O7	1.5993589483333275	3.563136328125011	2 Ba2ZnSi2O7 + 2 Li -> Li2ZnSiO4 + 2 BaSiO3 + Ba2SiO4 + Zn	2 Ba2ZnSi2O7 -> BaSi2O5 + BaZn2Si2O7 + O2 + 2 Ba	-0.15088604184043408	-0.2758539304374912	-0.041272515646050945
Ba2ZnWO6	1.4897704629166917	3.4278126222222167	3.231 Ba2ZnWO6 + 2.154 Li -> BaZnO2 + 1.077 Ba5Li2(WO5)3 + 0.07692 BaZn13 + 1.231 ZnO	10 Ba2ZnWO6 -> BaO10 + 10 BaWO4 + 10 ZnO + 9 Ba	-0.3574155905200773	-0.2854167067045279	-0.06684264646734484
Ba2ZrF8	1.1299259502083352	6.475234638749898	0.25 Ba2ZrF8 + Li -> LiF + 0.5 BaF2 + 0.25 Zr	Ba2ZrF8 -> BaZrF6 + 0.6667 BaF3 + 0.3333 Ba	-0.05681828181707216	-0.10012631064285116	-0.057470962642868884
Ba2ZrO4	0.19468343833334245	2.6741358150000587	2 Ba2ZrO4 + 2 Li -> Ba3Zr2O7 + Ba + Li2O	2 Ba2ZrO4 -> Ba3Zr2O7 + 0.5 BaO2 + 0.5 Ba	-0.2733404414772709	-0.43823194684783084	-0.14663075477968368
Ba2ZrSnO6	1.2739063970833675	3.382968406249999	6 Ba2ZrSnO6 + 8 Li -> Li8SnO6 + 3 Ba2SnO4 + 6 BaZrO3 + 2 Sn	Ba2ZrSnO6 -> SnO2 + ZrO2 + O2 + 2 Ba	-0.2499889995832545	-0.3470646299038562	-0.07347043736110725
Ba3(AlAs2)2	0.5287844552976302	1.1111362318749856	1.1 Ba3(AlAs2)2 + 4.2 Li -> Ba3AlAs3 + 1.4 Li3As + 0.3 BaAl4	1.5 Ba3(AlAs2)2 -> Ba3Al3As5 + 0.5 BaAs2 + Ba	-0.23967751684523875	-0.5517755117139356	-1.0754988353722
Ba3(AlN2)2	0.47396150416666316	0.3123687187499979	2 Ba3(AlN2)2 + 3 Li -> Li3AlN2 + 3 Ba2N + 3 AlN	Ba3(AlN2)2 -> BaN2 + 2 AlN + 2 Ba	-0.5867365675000031	-0.8363200577380971	-0.9399226940049306
Ba3(AlP2)2	0.42721848928571937	0.9235928638888576	0.7857 Ba3(AlP2)2 + 3 Li -> Li3P + 0.2143 BaAl4 + 0.7143 Ba3AlP3	6 Ba3(AlP2)2 -> Ba3P4 + 4 Ba3Al3P5 + 3 Ba	-0.2421499453095204	-0.5501852440299579	-1.3804745269029841
Ba3(AsO4)2	1.3149099409803888	3.6764454037500074	1.5 Ba3(AsO4)2 + 17 Li -> BaAs3 + 3.5 BaO + 8.5 Li2O	Ba3(AsO4)2 -> Ba2As2O7 + 0.5 O2 + Ba	-0.28048189599138285	-0.20231758540982114	-0.024440214278848238
Ba3(BN2)2	0.1710937175000229	0.7586666800000004	0.3333 Ba3(BN2)2 + 2 Li + Ba2N -> Ba3N + 0.6667 Li3BN2	Ba3(BN2)2 -> BaN2 + 2 BN + 2 Ba	-0.48172789882352607	-0.751385089761905	-0.8261459147255836
Ba3(BO3)2	0.4504169645833551	3.1820551825002417	0.65 Ba3(BO3)2 + Li -> BaLiBO3 + 0.9 BaO + 0.05 BaB6	4 Ba3(BO3)2 -> BaO2 + 2 Ba5B4O11 + Ba	-0.18968104671579766	-0.367294714275344	-0.10359513052956304
Ba3(GaS3)2	1.2986108908333276	2.107445402500044	0.3333 Ba3(GaS3)2 + 2 Li -> Li2S + BaS + 0.6667 Ga	1.5 Ba3(GaS3)2 -> Ba2GaS4 + Ba2Ga2S5 + 0.5 Ba	-0.03304911759257756	-0.22213065630434636	-0.7422349573486712
Ba3(H6Ir)2	0.21771994479167134	1.6470956716666625	0.3333 Ba3(H6Ir)2 + 2 Li -> BaLiH3 + 0.5 LiIr + 0.1667 Li3H6Ir	0.1667 Ba3(H6Ir)2 -> H2 + 0.3333 Ir + 0.5 Ba	-0.11751921720323955	-0.17870426957446384	-0.6497674662704043
Ba3(InP2)2	0.6845147733333308	1.072625389999985	0.4 Ba3(InP2)2 + 2.8 Li -> BaLiP + 0.2 BaIn4 + 0.6 Li3P	Ba3(InP2)2 -> BaP2 + Ba(InP)2 + Ba	-0.2404089317301552	-0.4761480809044878	-1.260920776250018
Ba3(PO4)2	0.7286002044999949	3.6618088700000024	2 Ba3(PO4)2 + 30 Li -> BaO + 15 Li2O + Ba5P4	2 Ba3(PO4)2 -> O2 + 2 Ba2P2O7 + 2 Ba	-0.0895884355172405	-0.18141043994652128	-0.023749684711571017
Ba3(PS4)2	1.7676101333333278	2.7337559331249994	Ba3(PS4)2 + 2 Li -> BaS + Li2S + 2 BaPS3	3 Ba3(PS4)2 -> BaS3 + 3 P2S7 + 8 Ba	-1.2186085078631677e-15	-0.159161809713118	-0.858482588989125
Ba3(SiAs2)2	0.7773055245833373	1.2701673303571448	1.333 Ba3(SiAs2)2 + 4 Li -> Ba4SiAs4 + 1.333 Li3As + 1.667 Si	1.5 Ba3(SiAs2)2 -> BaAs3 + 3 SiAs + 3.5 Ba	-0.22689316149999983	-0.4911675839156606	-1.1934171884524272
Ba3(SnAs2)2	0.7444314805833456	1.2835082644230813	0.75 Ba3(SnAs2)2 + 5 Li -> Li3As + 0.75 BaSn2 + 0.5 Ba3(LiAs)4	1.2 Ba3(SnAs2)2 -> BaAs3 + 0.6 Sn4As3 + 2.6 Ba	-0.1944760988018448	-0.43505414765618977	-0.8609086087729652
Ba3(SnP2)2	0.754442388333346	1.1332197149999998	1.5 Ba3(SnP2)2 + 6 Li -> Ba3P4 + 1.5 BaSn2 + 2 Li3P	0.75 Ba3(SnP2)2 -> BaP3 + 1.5 Sn + 1.25 Ba	-0.21275571982718589	-0.45200389621060966	-1.286354775009293
Ba3(TaS4)2	1.7132323593333325	2.435756637857134	1.5 Ba3(TaS4)2 + 5 Li -> Li2(TaS2)3 + 1.5 Li2S + 4.5 BaS	0.5 Ba3(TaS4)2 -> TaS3 + 0.3333 BaS3 + 1.167 Ba	-1.5000634437165252e-15	-0.25602731614814234	-0.8180842382953384
Ba3Al2B10H4O23	1.791300703422578	3.660509210312487	15 Ba3Al2B10H4O23 + 28 Li -> Li3B5(HO5)2 + 30 AlHO2 + 20 Ba2Li(BO2)5 + 5 BaLi(B3O5)3 + 14 H2	Ba3Al2B10H4O23 -> BaB8H4O15 + 0.4 Al5BO9 + 0.4 BaB4O7 + 0.8 O2 + 1.6 Ba	-0.0423941633691296	-0.21477393854167648	-0.020331195061800145
Ba3Al2F12	1.069837575833522	6.290932728749598	0.6667 Ba3Al2F12 + Li -> BaLiAlF6 + BaF2 + 0.3333 Al	0.5 Ba3Al2F12 -> BaAlF5 + 0.3333 BaF3 + 0.1667 Ba	-0.053354459797978926	-0.10610356443396185	-0.047650234954888626
Ba3Al3As5	0.5609127297222374	1.243531168928572	Ba3Al3As5 + 3 Li -> Li3As + Ba3(AlAs2)2 + Al	1.5 Ba3Al3As5 -> BaAs3 + 4.5 AlAs + 3.5 Ba	-0.21985319151842897	-0.5433046654235762	-1.1248903297142854
Ba3Al3P5	0.45253404900793637	1.149743477500001	1.111 Ba3Al3P5 + 4.667 Li -> Ba3(AlP2)2 + 1.556 Li3P + 0.3333 BaAl4	1.5 Ba3Al3P5 -> BaP3 + 4.5 AlP + 3.5 Ba	-0.20559074663605492	-0.5304628569102203	-1.391553922583257
Ba3AlAs3	0.42675295547619163	1.0597135347916598	0.3636 Ba3AlAs3 + 1.273 Li -> BaLiAs + 0.09091 Li3As + 0.09091 BaAl4	2 Ba3AlAs3 -> Ba3(AlAs2)2 + BaAs2 + 2 Ba	-0.2763225798122988	-0.5709882767467986	-1.0092119772281207
Ba3AlHO4	0.3520096743333463	1.069048780833341	Li + 0.6 Ba4Al2O7 + 0.6 BaO -> Ba3AlO4 + 0.2 Li5AlO4	6 Ba3AlHO4 -> BaAl2O4 + 2 Ba4Al2O7 + 3 Ba(HO)2 + 6 Ba	-0.33409109702866546	-0.4983872557266582	-0.2623915243038608
Ba3AlP3	0.40717503833332636	0.8527092966666707	4 Ba3AlP3 + 14 Li -> Li3P + BaAl4 + 11 BaLiP	2 Ba3AlP3 -> Ba3(AlP2)2 + 0.5 Ba3P4 + 1.5 Ba	-0.3015133889620847	-0.5789351282896598	-1.3675189703571216
Ba3As14	0.9341808620000034	1.4268629924999887	0.3333 Ba3As14 + 5 Li -> BaAs3 + 1.667 Li3As	0.07143 Ba3As14 -> As + 0.2143 Ba	-0.11015778374865715	-0.288976829768278	-0.7623721236272767
Ba3B(BrO)3	0.7057144466458638	3.3120345583333224	9.933 Ba3B(BrO)3 + 5.333 Li -> Ba5B3BrO9 + 4.8 Ba4Br6O + 0.2667 BaB6 + 5.333 BaLiBO3	6 Ba3B(BrO)3 -> Ba(BrO3)2 + 3 Ba(BO2)2 + 8 BaBr2 + 6 Ba	-0.09773945506785342	-0.2725842807291463	-0.06437605696262994
Ba3B3Pb2BrO9	2.031975136594216	3.014384954999947	9.5 Ba3B3Pb2BrO9 + 23 Li -> Ba2Li(BO2)5 + 1.5 Ba3B(BrO)3 + 2.5 Pb3(BrO)2 + 22 BaLiBO3 + 11.5 Pb	0.75 Ba3B3Pb2BrO9 -> Ba(BO2)2 + 0.5 Pb3O4 + 0.25 Ba3B(BrO)3 + 0.5 Ba	-0.19548057697293686	-0.29709000999997937	-0.06594718243279063
Ba3B3Pb2ClO9	2.013999811135795	3.0079137279167525	9.8 Ba3B3Pb2ClO9 + 31.4 Li -> Li6B4O9 + 0.3 Pb13(Cl3O5)2 + 25.4 BaLiBO3 + 4 BaCl2 + 15.7 Pb	1.5 Ba3B3Pb2ClO9 -> Pb3O4 + 2 Ba(BO2)2 + 0.1667 Ba5B3ClO9 + 0.6667 BaCl2 + Ba	-0.2001544887599147	-0.29528008213889567	-0.06732944211092651
Ba3B6H2O13	1.5760167195833081	3.588058269166613	Ba3B6H2O13 + 2 Li -> Ba2Li(BO2)5 + BaLiBO3 + H2	1.2 Ba3B6H2O13 -> Ba2B5HO10 + 0.2 Ba2B11H7O22 + 0.6 O2 + 1.2 Ba	-0.0582272053654167	-0.22972993788265872	-0.03146555833329234
Ba3B6O11F2	1.4173628323957743	3.642300943125097	1.049 Ba3B6O11F2 + 1.098 Li -> Ba2Li(BO2)5 + 0.06863 B6O + 0.09804 BaLi(B3O5)3 + 1.049 BaF2	0.6667 Ba3B6O11F2 -> BaB4O7 + 0.6667 BaF2 + 0.1667 O2 + 0.3333 Ba	-0.05198845702666954	-0.21929459127840922	-0.024630932025423213
Ba3BAsO3	0.24568703145299986	1.0167584891666541	0.3333 Ba3BAsO3 + 2 Li -> Li2O + 0.05556 BaB6 + 0.02564 Ba20As13 + 0.4316 Ba	2 Ba3BAsO3 -> BaAs2 + Ba3(BO3)2 + 2 Ba	-0.270472605083973	-0.4701460917903302	-0.6039432473437492
Ba3BPO3	0.2589974045833565	0.7827082116666505	Ba3BPO3 + 2 Li -> BaLiP + BaLiBO3 + Ba	4 Ba3BPO3 -> Ba3P4 + 2 Ba3(BO3)2 + 3 Ba	-0.30144172790178203	-0.4863276628748534	-0.8687721010937524
Ba3Bi(ClO)3	1.3888757624999846	2.8310312875000028	Ba3Bi(ClO)3 + 3 Li -> BaO + 1.5 Li2O + 0.5 Ba4Cl6O + Bi	0.6667 Ba3Bi(ClO)3 -> BaCl2 + 0.6667 BaBiO3 + 0.3333 Ba	-0.26948459648003453	-0.3478728893840568	-0.10759366028593931
Ba3Bi2(PO4)4	2.434653339999994	3.912083919999988	Ba3Bi2(PO4)4 + 6 Li -> Ba3(PO4)2 + 2 Li3PO4 + 2 Bi	0.5 Ba3Bi2(PO4)4 -> BiPO4 + 0.25 O2 + 0.5 Ba2P2O7 + 0.5 Ba	-0.10149206934077792	-0.16188762791895606	-0.04354284325471669
Ba3Bi2TeO9	1.8702886399404965	2.893797667500033	2.111 Ba3Bi2TeO9 + 6.222 Li -> Li6TeO6 + 0.1111 Ba5Li2(TeO5)3 + 2.111 Ba2Bi2O5 + 0.7778 Ba2TeO	1.5 Ba3Bi2TeO9 -> BaBiO3 + 0.5 Bi2O3 + 0.5 Ba6Bi2(TeO6)3 + 0.5 Ba	-0.3850502109901939	-0.3375365156623622	-0.09747302870567154
Ba3Bi6PbSe13	1.5357255422222205	2.3159454262499883	0.1111 Ba3Bi6PbSe13 + 2 Li -> Li2Se + 0.3333 BaSe + 0.6667 Bi + 0.1111 PbSe	Ba3Bi6PbSe13 -> Bi2PbSe4 + BaSe3 + 2 Bi2Se3 + 2 Ba	0.0	-0.13792494056336158	-0.419822533621788
Ba3Ca2(SiN3)2	0.25837855395834797	0.42850090833333526	1.5 Ba3Ca2(SiN3)2 + 4 Li -> Ba3N + Li4Ca3(SiN3)2 + BaSiN2 + 0.5 Ba	2.5 Ba3Ca2(SiN3)2 -> Ca5(SiN3)2 + 1.5 BaN2 + 3 BaSiN2 + 3 Ba	-0.5022812748500018	-0.7723271803535354	-0.9236460989908353
Ba3CaNb2O9	0.49301082533333473	3.341797082857158	0.2 Ba3CaNb2O9 + 2 Li -> Li2O + 0.6 BaO + 0.2 CaO + 0.4 Nb	2 Ba3CaNb2O9 -> Ca2Nb2O7 + 0.5 Ba5Nb4O15 + 1.75 O2 + 3.5 Ba	-0.20916806809373956	-0.3360407866532231	-0.07444626563727308
Ba3CaTa2O9	0.2672999745833309	3.3870502250000003	0.125 Ba3CaTa2O9 + 2 Li -> Li2O + 0.125 CaO + 0.375 Ba + 0.25 Ta	Ba3CaTa2O9 -> CaTa2O6 + 1.5 O2 + 3 Ba	-0.15561275808712738	-0.3257921886764694	-0.0725004714379196
Ba3Co(CN)3	0.14658091783334193	0.5099989000000117	0.3333 Ba3Co(CN)3 + 2 Li + 2 BaCoN -> Ba3N + Li2CN2 + 2.333 Co	0.6667 Ba3Co(CN)3 -> BaCN2 + C + 0.6667 Co + Ba	-0.3769272844426048	-0.6378248686015482	-0.8030097703672183
Ba3Co3Te(PO7)2	2.5847069187499727	3.6982969399999153	Ba3Co3Te(PO7)2 + 2 Li -> BaTeO3 + 0.6667 Ba3(PO4)2 + 3 CoO + 0.6667 Li3PO4	6.4 Ba3Co3Te(PO7)2 -> BaTeO4 + 6.4 Ba2P2O7 + 5.4 CoTeO4 + 0.6 Co23O32 + 5.4 Ba	-0.2738325018416763	-0.1814046676615304	-0.06441813000001684
Ba3Cr2MoO9	1.5226416533332756	2.3557597156250503	Ba3Cr2MoO9 + Li -> Ba2CrMoO6 + LiCrO2 + BaO	4 Ba3Cr2MoO9 -> Ba3Cr2O8 + 3 BaCr2O4 + 4 BaMoO4 + 2 Ba	-1.690014524356061	-0.31795218621429155	-1.9020590767524963
Ba3Cr2WO9	1.2478004500000015	2.731390687500044	1.5 Ba3Cr2WO9 + 3 Li -> Ba3WO6 + 3 LiCrO2 + 1.5 BaO + 0.5 W	Ba3Cr2WO9 -> BaWO4 + 0.8 BaCrO4 + 0.6 Cr2O3 + 1.2 Ba	-1.6631244958712093	-0.31464242320511815	-1.90740761570598
Ba3Dy(BO3)3	0.8823934470833947	3.353679802708348	0.6 Ba3Dy(BO3)3 + Li -> BaLiBO3 + 0.05 BaB6 + 0.25 Ba3(BO3)2 + 0.3 Dy2O3	Ba3Dy(BO3)3 -> Ba(BO2)2 + DyBO3 + O2 + 2 Ba	-0.12580977994212006	-0.3180611924509771	-0.06821691259662765
Ba3Dy2(PS4)4	2.0754421970832944	2.7724623097916603	0.6667 Ba3Dy2(PS4)4 + 2 Li -> LiDyS2 + 0.3333 DyPS4 + 0.3333 Li3PS4 + 2 BaPS3	1.143 Ba3Dy2(PS4)4 -> Ba3(PS4)2 + 1.286 P2S7 + 0.4286 BaS3 + 2.286 Dy	-2.2816012250714835e-14	-0.1688177364803949	-0.890195283415633
Ba3Er(BO3)3	0.8808177760834095	3.3328162604166587	0.6 Ba3Er(BO3)3 + Li -> BaLiBO3 + 0.05 BaB6 + 0.25 Ba3(BO3)2 + 0.3 Er2O3	Ba3Er(BO3)3 -> Ba(BO2)2 + ErBO3 + O2 + 2 Ba	-0.1252280161815511	-0.3248168128431317	-0.0681762117609086
Ba3Er2(PS4)4	2.1265992706249612	2.710662903124991	0.6667 Ba3Er2(PS4)4 + 2 Li -> LiErS2 + 0.3333 ErPS4 + 0.3333 Li3PS4 + 2 BaPS3	1.143 Ba3Er2(PS4)4 -> Ba3(PS4)2 + 0.4286 BaS3 + 1.286 P2S7 + 2.286 Er	-1.1389386419580205e-14	-0.1788583803767141	-0.8932311330761344
Ba3Er2MoO9	1.2497222416666618	2.9655584275000644	0.3333 Ba3Er2MoO9 + 2 Li -> BaO + 0.6667 LiErO2 + 0.6667 Li2O + 0.3333 Mo	Ba3Er2MoO9 -> BaO2 + BaMoO4 + Er2O3 + Ba	-0.324923730624997	-0.40133514207143994	-0.11621446306760053
Ba3Fe2Br2O5	1.5062741217500104	3.166787735833338	1.333 Ba3Fe2Br2O5 + 5 Li -> Li5FeO4 + 1.333 Ba2Br2O + 1.333 BaO + 1.667 Fe	3 Ba3Fe2Br2O5 -> Ba(BrO3)2 + 3 Fe2O3 + 2 BaBr2 + 6 Ba	-0.2949258482670438	-0.34277791500000676	-0.10388797147568862
Ba3Fe2Cl2O5	1.460246244416652	3.1627217712499958	1.333 Ba3Fe2Cl2O5 + 5 Li -> Li5FeO4 + 2.222 BaO + 0.4444 Ba4Cl6O + 1.667 Fe	Ba3Fe2Cl2O5 -> Fe2O3 + 0.75 BaCl2 + 0.25 Ba(ClO4)2 + 2 Ba	-0.29996251474431324	-0.3438820574218666	-0.11108147260413848
Ba3Fe2TeO9	1.8885952693511974	3.4174064854166812	0.625 Ba3Fe2TeO9 + 5 Li -> Li5FeO4 + 0.125 Ba2Fe2O5 + 0.375 BaO + 0.625 Ba2TeO	Ba3Fe2TeO9 -> BaTeO4 + 0.2 BaO10 + Fe2O3 + 1.8 Ba	-0.40325359013854767	-0.3099695951922947	-0.12425692595648119
Ba3Fe2WO9	2.1544059052976223	3.1722267120833907	3.5 Ba3Fe2WO9 + 2 Li -> LiFeO2 + 2 Ba2Fe2O5 + 0.5 Ba5Li2(WO5)3 + 2 Ba2FeWO6	1.5 Ba3Fe2WO9 -> BaFeO3 + 1.5 Ba2WO5 + Fe2O3 + 0.5 Ba	-0.3713644299810648	-0.32549986474357606	-0.09686853689633601
Ba3Fe4P8PbO28	2.4350887926189824	3.3662763041666373	Ba3Fe4P8PbO28 + 3.5 Li -> BaP2PbO7 + Ba2P2O7 + 3.5 LiFePO4 + 0.5 FeP	0.6667 Ba3Fe4P8PbO28 -> BaFe2(P2O7)2 + 0.6667 FeP2PbO7 + Ba	-0.0969274098560593	-0.1412318373694692	-0.12757739143200375
Ba3Ga2B10H4O23	1.8603706787962626	3.701398545208345	1.06 Ba3Ga2B10H4O23 + 1.08 Li -> BaGaB4H3O10 + 0.62 Ba3B6H2O13 + 0.76 LiGaO2 + 0.32 BaLi(B3O5)3 + 0.36 Ga	0.75 Ba3Ga2B10H4O23 -> BaGaB4H3O10 + 0.875 BaB4O7 + 0.25 Ga2O3 + 0.1875 O2 + 0.375 Ba	-0.09078208776711438	-0.2042177951371742	-0.018194630446413562
Ba3Ga3P5	0.6968185944444256	1.0307220411111055	0.8333 Ba3Ga3P5 + 2 Li -> Ba(GaP)2 + 0.6667 Li3P + 0.5 Ba3GaP3	2 Ba3Ga3P5 -> Ba3P4 + 6 GaP + 3 Ba	-0.22798273544381464	-0.44574284582584145	-1.2560772148434103
Ba3Ga4O9	1.1126428242381208	3.2514178150000785	1.537 Ba3Ga4O9 + 8.537 Li -> Ba4Ga2O7 + 1.707 Li5GaO4 + 0.6098 BaGa4	0.5 Ba3Ga4O9 -> Ba(GaO2)2 + 0.25 BaO2 + 0.25 Ba	-0.307943995716907	-0.3206774014130436	-0.08474732607754953
Ba3GaAs3	0.5866770954166749	1.09383172249999	4 Ba3GaAs3 + 12 Li -> Ba3(LiAs)4 + 8 BaLiAs + BaGa4	4 Ba3GaAs3 -> Ba7Ga4As9 + 1.5 BaAs2 + 3.5 Ba	-0.26983495461660967	-0.5260793837910538	-0.9072633445028083
Ba3GaP3	0.6099673676190402	0.9301856394444379	4 Ba3GaP3 + 14 Li -> Li3P + BaGa4 + 11 BaLiP	3 Ba3GaP3 -> Ba3Ga3P5 + Ba3P4 + 3 Ba	-0.3046771393230965	-0.5498200732365457	-1.316550591249982
Ba3GaS4Br	1.2107753624999982	2.324158791718768	2 Ba3GaS4Br + 6 Li -> BaBr2 + 3 Li2S + 5 BaS + 2 Ga	1.5 Ba3GaS4Br -> BaS3 + 0.75 Ba(GaS2)2 + 0.75 BaBr2 + 2 Ba	-0.02201716076493332	-0.23450118171052514	-0.7106796591855435
Ba3GaS4Cl	1.229740127499998	2.269148637499977	2 Ba3GaS4Cl + 6 Li -> BaCl2 + 3 Li2S + 5 BaS + 2 Ga	Ba3GaS4Cl -> Ba2GaS4 + 0.5 BaCl2 + 0.5 Ba	-0.024565454626868988	-0.23515151460526207	-0.7115169518989373
Ba3Gd2(PS4)4	2.0966242592707562	2.791159050208326	Li + 0.125 Gd10S19 -> LiGdS2 + 0.125 Gd2S3	1.143 Ba3Gd2(PS4)4 -> Ba3(PS4)2 + 1.286 P2S7 + 0.4286 BaS3 + 2.286 Gd	-2.298461604581803e-14	-0.13819432123529407	-0.8821637186934297
Ba3Ge2(B3O8)2	2.1916529901157262	3.580729606979098	0.8333 Ba3Ge2(B3O8)2 + Li -> Ba2Li(BO2)5 + 0.1944 BaGeO3 + 0.3056 BaGe4O9 + 0.25 Ge	0.6667 Ba3Ge2(B3O8)2 -> BaB4O7 + 0.3333 BaGe4O9 + 0.3333 O2 + 0.6667 Ba	-0.15351627936083379	-0.22615498672900092	-0.027905961546267122
Ba3GeO5	0.9387731652083371	2.5723482162499844	0.4 Ba3GeO5 + 2 Li -> Li2O + 0.2 BaGe2 + BaO	2 Ba3GeO5 -> BaO2 + 2 Ba2GeO4 + Ba	-0.3575841490460827	-0.4435962621770777	-0.16680720025775608
Ba3GeS5	1.5600229095833333	2.2310171199999993	0.5 Ba3GeS5 + 2 Li -> Li2S + 1.5 BaS + 0.5 Ge	2 Ba3GeS5 -> BaS2 + 2 Ba2GeS4 + Ba	-0.027227246300038477	-0.2500376791964172	-0.7512193371973686
Ba3Hf2O7	0.16786083333331447	2.727781025000027	Ba3Hf2O7 + 2 Li -> Li2O + Ba + 2 BaHfO3	2 Ba3Hf2O7 -> BaO2 + 4 BaHfO3 + Ba	-0.20965478781249747	-0.39245194443749964	-0.11198302884057476
Ba3Ho(BO3)3	0.8721526757084028	3.3307109362499916	0.6 Ba3Ho(BO3)3 + Li -> BaLiBO3 + 0.05 BaB6 + 0.25 Ba3(BO3)2 + 0.3 Ho2O3	Ba3Ho(BO3)3 -> Ba(BO2)2 + HoBO3 + O2 + 2 Ba	-0.12566465413392525	-0.3200732344852897	-0.06845761159350605
Ba3Ho2(PS4)4	2.0965578837499628	2.7252358739583276	0.6667 Ba3Ho2(PS4)4 + 2 Li -> LiHoS2 + 0.3333 HoPS4 + 0.3333 Li3PS4 + 2 BaPS3	1.143 Ba3Ho2(PS4)4 -> Ba3(PS4)2 + 1.286 P2S7 + 0.4286 BaS3 + 2.286 Ho	-2.2796489538468025e-14	-0.17310304573529245	-0.891635277304522
Ba3Ho2MoO9	1.257020507499986	2.9307520056250675	Ba3Ho2MoO9 + 6 Li -> BaHo2O4 + 2 BaO + 3 Li2O + Mo	Ba3Ho2MoO9 -> BaO2 + BaMoO4 + Ho2O3 + Ba	-0.3297699623491397	-0.39480486392857594	-0.1189497726640587
Ba3In(BO3)3	1.9006047591666915	3.3245949074999936	0.3333 Ba3In(BO3)3 + Li -> BaLiBO3 + 0.3333 In	0.6667 Ba3In(BO3)3 -> Ba(BO2)2 + 0.3333 In2O3 + 0.5 O2 + Ba	-0.19001334953799986	-0.2937762714705787	-0.06345323272775216
Ba3In2(HO)12	3.3247826910416602	3.27434965216668	2.4 Li + 0.6 BaH8O5 + 0.4 Ba(H2O3)2 -> BaH4O3 + 2.4 LiHO	4.667 Ba3In2(HO)12 -> Ba(H8O5)2 + 3 Ba(H2O3)2 + 9.333 In(HO)3 + 10 Ba	-0.1932041101829256	-0.2534793364622643	-0.0688572698094414
Ba3In2(PO4)4	2.3218385041666525	4.029397597500027	2 Ba3In2(PO4)4 + 6 Li -> In2O3 + 2 Li3PO4 + 3 Ba2P2O7 + 2 In	0.5 Ba3In2(PO4)4 -> InPO4 + 0.25 O2 + 0.5 Ba2P2O7 + 0.5 Ba	-0.10081709666935312	-0.1554828707211544	-0.04421763249998234
Ba3In2F12	2.456679305833611	6.3057898612501075	0.1667 Ba3In2F12 + Li -> LiF + 0.5 BaF2 + 0.3333 In	1.5 Ba3In2F12 -> BaF3 + 3 BaInF5 + 0.5 Ba	-0.12342107424242821	-0.10996802070754375	-0.07516531173779661
Ba3In2MoO9	1.3896100983333213	2.832051847500072	2.5 Ba3In2MoO9 + 5 Li -> Ba3In2O6 + Ba2In2O5 + 2.5 BaMoO3 + Li5InO4	Ba3In2MoO9 -> BaO2 + BaMoO4 + In2O3 + Ba	-0.4013465650604804	-0.336975943357142	-0.12670790819554245
Ba3In2O6	1.3267310166666597	2.598057340000055	0.3333 Ba3In2O6 + 2 Li -> Li2O + BaO + 0.6667 In	2 Ba3In2O6 -> BaO2 + 2 Ba2In2O5 + Ba	-0.4420647121739285	-0.49293288739129615	-0.1939576806250214
Ba3In2WO9	1.3576258823808718	3.088780602499997	2.25 Ba3In2WO9 + 5.25 Li -> Ba3In2O6 + 0.75 Ba5Li2(WO5)3 + 0.75 Li5InO4 + 1.75 In	2 Ba3In2WO9 -> BaO2 + 2 Ba2WO5 + 2 In2O3 + Ba	-0.3671359847378932	-0.32740675846151257	-0.09177984382544757
Ba3InAs3	0.6076584508333409	1.1384683119270795	4 Ba3InAs3 + 12 Li -> Ba3(LiAs)4 + 8 BaLiAs + BaIn4	5 Ba3InAs3 -> Ba2(InAs)5 + 5 BaAs2 + 8 Ba	-0.26108437225913317	-0.5192894588568437	-0.8698491559907656
Ba3Ir(CN)3	0.8370020533333182	0.5955244649999684	Li + 3 Ir -> LiIr3	0.6667 Ba3Ir(CN)3 -> BaCN2 + C + 0.6667 Ir + Ba	-0.35817758332031424	-0.6287015992945952	-0.79065325224123
Ba3La2C5O15F2	2.232910544999827	4.057207272222237	0.6667 Ba3La2C5O15F2 + 0.1481 Li -> Ba2LaC3O9F + 0.1481 LiLa(CO3)2 + 0.1111 LaOF + 0.07407 LaF3 + 0.03704 C	0.5 Ba3La2C5O15F2 -> LaCO3F + 1.5 CO2 + 0.75 O2 + 1.5 Ba	-0.1477300607189882	-0.1728171314605711	-0.015690998431383996
Ba3Lu(BO3)3	0.865624726958405	3.378449002083325	0.6 Ba3Lu(BO3)3 + Li -> BaLiBO3 + 0.05 BaB6 + 0.25 Ba3(BO3)2 + 0.3 Lu2O3	Ba3Lu(BO3)3 -> Ba(BO2)2 + LuBO3 + O2 + 2 Ba	-0.11675715310416024	-0.3204242642647137	-0.062488897976743285
Ba3Lu2MoO9	1.2505647399999924	3.052712794375066	0.3333 Ba3Lu2MoO9 + 2 Li -> BaO + 0.6667 LiLuO2 + 0.6667 Li2O + 0.3333 Mo	Ba3Lu2MoO9 -> BaO2 + BaMoO4 + Lu2O3 + Ba	-0.3110241590732672	-0.38910669264285236	-0.10934441424868435
Ba3Lu4O9	0.36050922833330823	2.5919696975000153	0.25 Ba3Lu4O9 + Li -> LiLuO2 + 0.25 BaO + 0.5 Ba	0.6667 Ba3Lu4O9 -> BaO2 + 1.333 Lu2O3 + Ba	-0.2902638811298006	-0.4851081965865407	-0.1755765225790995
Ba3MgTa2O9	0.2728409173333275	3.4928135148611217	0.3333 Ba3MgTa2O9 + 3.333 Li -> BaO + 1.667 Li2O + 0.3333 MgO + 0.6667 Ta	1.333 Ba3MgTa2O9 -> BaTa2O6 + 0.3333 Mg4Ta2O9 + 1.5 O2 + 3 Ba	-0.12907795111744846	-0.3136875580882337	-0.057938188069067476
Ba3MgTaNbO9	0.4947016973333074	3.4611964116666725	2 Ba3MgTaNbO9 + 10 Li -> Ba3MgTa2O9 + 5 Li2O + 3 BaO + MgO + 2 Nb	2 Ba3MgTaNbO9 -> BaNb2O6 + 0.3333 Mg4Ta2O9 + 0.6667 Ba3MgTa2O9 + 1.5 O2 + 3 Ba	-0.15257096840783513	-0.3140795063262174	-0.059150267174782556
Ba3Mn2O8	2.738020917083407	3.1838352024999836	3.5 Ba3Mn2O8 + 2 Li -> Li2MnO3 + 2 Ba4Mn3O10 + 2.5 BaO2	0.5 Ba3Mn2O8 -> BaMnO3 + 0.5 O2 + 0.5 Ba	-0.46919976738259317	-0.31952396654999715	-0.14034722786063858
Ba3MnNb2O9	0.9512086337428212	2.7525329965624796	4 Ba3MnNb2O9 + 8 Li -> Li8Nb2O9 + 3 Ba4Nb2O9 + 4 Mn	2 Ba3MnNb2O9 -> Mn2O3 + Ba5Nb4O15 + Ba	-0.19506686955849561	-0.30096188510980193	-0.0784883306356301
Ba3Mo2(P2O9)2	3.507796800833347	3.7041214050001	0.7273 Ba3Mo2(P2O9)2 + 0.5455 Li -> BaMo(PO4)2 + 0.3636 Ba2P2O7 + 0.1818 Li3PO4 + 0.4545 BaMoO4	1.5 Ba3Mo2(P2O9)2 -> BaMo(PO4)2 + BaMo2(PO6)2 + Ba2P2O7 + 0.5 Ba	-0.2193010227628518	-0.14349776773517653	-0.11000816402893054
Ba3MoN4	0.21258264333333432	1.2048924813274442	0.3333 Ba3MoN4 + 2 Li -> Ba + 0.3333 Li6MoN4	15 Ba3MoN4 -> Mo15N16 + 7.333 BaN6 + 37.67 Ba	-0.3687628747867606	-0.6741128579709819	-0.610221602983783
Ba3Na2Cr4F20	2.343371769166687	5.073929386250042	1.5 Ba3Na2Cr4F20 + 3 Li -> BaCrF5 + Na3Li3Cr2F12 + 3.5 BaF2 + 3 CrF2	Ba3Na2Cr4F20 -> BaNaCrF6 + 2 BaCrF6 + 0.3333 Na3CrF6 + 0.6667 Cr	-0.10256967918522752	-0.08139031336949598	-1.9743344613529468
Ba3NaBiO6	1.712638420416634	3.1003628362500035	0.4286 Ba3NaBiO6 + 0.8571 Li -> BaO + 0.1429 Ba2Bi2O5 + 0.1429 Na3BiO3 + 0.4286 Li2O	4 Ba3NaBiO6 -> Na3BiO4 + Ba4Na(BiO4)3 + 4 BaO2 + 4 Ba	-0.4672937505952319	-0.4282892987231177	-0.18748466189659085
Ba3NaGd3(Si3O10)2	0.7906151023039119	3.7034646635416726	0.6667 Ba3NaGd3(Si3O10)2 + 5.667 Li -> Ba2SiO4 + 0.6667 NaLi3SiO4 + 0.9167 Li4SiO4 + Gd2O3 + 1.417 Si	2 Ba3NaGd3(Si3O10)2 -> Na2Si2O5 + 3 Gd2Si2O7 + 4 SiO2 + 3 O2 + 6 Ba	-0.07796623930647328	-0.251884345617269	-0.03904380101155969
Ba3NaNd3(Si3O10)2	0.8076434464582078	3.6657983928125204	1.333 Ba3NaNd3(Si3O10)2 + 2 Li -> BaNaNdSi2O7 + 0.3333 NaNd9(Si3O13)2 + 3 BaSiO3 + 0.5 Li4SiO4 + 0.5 Si	1.333 Ba3NaNd3(Si3O10)2 -> NaNd(Si3O7)2 + 0.3333 NaNd9(Si3O13)2 + 2 O2 + 4 Ba	-0.07405491411290388	-0.28526926087814086	-0.04171979795523528
Ba3NaRuO6	1.5285566053333297	2.8330964866071473	2 Ba3NaRuO6 + 10 Li -> Na2O + 5 Li2O + 6 BaO + 2 Ru	3 Ba3NaRuO6 -> Ba3NaRu2O9 + Na2RuO4 + 2.5 BaO2 + 3.5 Ba	-0.4689064491335273	-0.4386994638875015	-0.16984110511985895
Ba3NaTaO6	0.28933416583332483	2.927856046551688	Ba3NaTaO6 + 8 Li -> BaO + Ba2NaO + 4 Li2O + Ta	2 Ba3NaTaO6 -> BaO2 + BaO + Ba4Ta2O9 + 2 Na	-0.2840086904780188	-0.4419258755435824	-0.15583056968040276
Ba3NaY3(Si3O10)2	0.883081591458089	3.617996228425945	0.75 Ba3NaY3(Si3O10)2 + Li -> LiYSiO4 + 0.75 NaYSiO4 + 0.25 Y2SiO5 + 2.25 BaSiO3 + 0.25 Si	3 Ba3NaY3(Si3O10)2 -> Na3Y(Si2O5)3 + 4 Y2Si2O7 + 4 SiO2 + 4.5 O2 + 9 Ba	-0.06985418579033009	-0.2778352153136221	-0.04007299705203993
Ba3Nb2CdO9	1.832550162083264	3.3156755175000048	1.5 Ba3Nb2CdO9 + Li -> Ba4LiNb3O12 + 0.5 BaCdO2 + 0.5 Cd + 0.5 CdO	2 Ba3Nb2CdO9 -> Ba5Nb4O15 + 0.5 O2 + 2 CdO + Ba	-0.24875685776047707	-0.30450716321790816	-0.061549753242667204
Ba3Nb2NiO9	1.8140200939584088	3.451683552708353	4 Ba3Nb2NiO9 + 8 Li -> Li8Nb2O9 + 3 Ba4Nb2O9 + 4 Ni	3 Ba3Nb2NiO9 -> Ni3O4 + 3 BaNb2O6 + 2.5 O2 + 6 Ba	-0.24880771106599298	-0.2957018873133217	-0.0642603279593601
Ba3Nb2O8	1.2743293783332348	3.121020844999895	3 Ba3Nb2O8 + Li -> Ba4LiNb3O12 + Ba4Nb2O9 + BaNbO3	2 Ba3Nb2O8 -> Ba5Nb4O15 + 0.5 BaO2 + 0.5 Ba	-0.21203486888223555	-0.31361954335000686	-0.07224222374644285
Ba3P14	0.9186889268333278	1.5729624227777832	0.2 Ba3P14 + Li -> LiP + 0.6 BaP3	0.07143 Ba3P14 -> P + 0.2143 Ba	-0.07926387983312644	-0.26293684011310514	-1.2554564452816943
Ba3P3ClO10	2.486881087166644	4.268909083124948	2 Ba3P3ClO10 + 0.8333 Li -> BaCl2 + 0.8333 LiPO3 + 2.5 Ba2P2O7 + 0.1667 P	0.6667 Ba3P3ClO10 -> Ba(PO3)2 + 0.08333 Ba(ClO4)2 + 0.25 BaCl2 + 0.6667 Ba	-0.05923207311793588	-0.14687356695859588	-0.09708483488637754
Ba3P6(N4O3)2	1.6403432280044132	2.762981211428588	1.333 Ba3P6(N4O3)2 + 3.619 Li -> Ba3(PO4)2 + 3.619 LiPN2 + 0.04762 Ba3P14 + 0.8571 Ba(PN2)2	0.8667 Ba3P6(N4O3)2 -> P4N6O + 0.6 Ba2P2O7 + 0.4667 N2 + 1.4 Ba	-0.04225381840003273	-0.27330656436064027	-0.5879599889957574
Ba3Rh(CN)3	0.2872848533333434	0.4732398099999711	0.6667 Li + 0.3333 LiRh3 -> LiRh	0.6667 Ba3Rh(CN)3 -> BaCN2 + C + 0.6667 Rh + Ba	-0.40469407106250355	-0.6416570268193471	-0.8025239228212415
Ba3Sc(BO3)3	1.0045156977083938	3.3346231954861447	0.6 Ba3Sc(BO3)3 + Li -> BaLiBO3 + 0.05 BaB6 + 0.25 Ba3(BO3)2 + 0.3 Sc2O3	0.6667 Ba3Sc(BO3)3 -> Ba(BO2)2 + 0.5 O2 + 0.3333 Sc2O3 + Ba	-0.11814760440518324	-0.3116583224019567	-0.06179983166536207
Ba3ScCO3F7	2.383092519270796	4.110671167500011	2 Ba3ScCO3F7 + 4 Li -> BaCO3 + 4 LiF + 5 BaF2 + Sc2O3 + C	Ba3ScCO3F7 -> CO2 + 2 BaF2 + ScF3 + 0.5 O2 + Ba	-0.09107286149694005	-0.14406877723683786	-0.0332225830681665
Ba3Si2(B3O8)2	1.3370361827866688	3.60242115687487	1.172 Ba3Si2(B3O8)2 + Li -> Ba2Li(BO2)5 + 0.8281 BaSi2(BO4)2 + 0.0625 B6O + 0.6875 BaSiO3	Ba3Si2(B3O8)2 -> BaSi2(BO4)2 + BaB4O7 + 0.5 O2 + Ba	-0.047790587651846295	-0.2261909562616804	-0.026350270597241376
Ba3Si6N4O9	0.9328201020832834	1.888756219999955	0.3333 Ba3Si6N4O9 + 0.4444 Li -> BaSiO3 + 0.4444 LiSi2N3 + 0.1111 Si	1.5 Ba3Si6N4O9 -> Ba3Si6(NO6)2 + 1.5 Si2N2O + 0.5 N2 + 1.5 Ba	-0.07112824708985332	-0.37029419162036836	-0.4109295469953578
Ba3SiS5	1.2399135620833366	2.2634373325000072	0.3333 Ba3SiS5 + 1.333 Li -> BaS + 0.6667 Li2S + 0.3333 Si	2 Ba3SiS5 -> BaS2 + 2 Ba2SiS4 + Ba	-0.014637944418601556	-0.2950845361206893	-0.7950431167237022
Ba3SmInS6	1.4153411695833507	2.197820446250031	2 Ba3SmInS6 + 6 Li -> Ba(SmS2)2 + 3 Li2S + 5 BaS + 2 In	2 Ba3SmInS6 -> Ba2In2S5 + Ba(SmS2)2 + 1.5 BaS2 + 1.5 Ba	-0.03027870042807601	-0.29674602842672293	-0.7405149667085167
Ba3Sn2O7	1.5566627633332741	3.0307023400000244	3 Ba3Sn2O7 + 2 Li -> Li2SnO3 + 4.5 Ba2SnO4 + 0.5 Sn	0.5 Ba3Sn2O7 -> BaSnO3 + 0.25 BaO2 + 0.25 Ba	-0.3421254312740398	-0.38832752572917384	-0.11996945568840323
Ba3Sn2S7	1.8872999189582815	2.373501241666676	0.6667 Ba3Sn2S7 + 0.4444 Li -> Ba2SnS4 + 0.1111 Li4SnS4 + 0.2222 SnS	2.333 Ba3Sn2S7 -> BaS3 + 0.6667 Ba6Sn7S20 + 2 Ba	-0.022704171607137447	-0.21958590822916424	-0.7436450198897023
Ba3Sr2Re3ClO15	1.741283345476235	3.8847135219212716	Ba3Sr2Re3ClO15 + 1.556 Li -> Sr2LiReO6 + 0.5556 Ba5Re3ClO15 + 0.1111 Li5ReO6 + 0.2222 BaCl2 + 0.2222 Re	2.5 Ba3Sr2Re3ClO15 -> Sr5Re3ClO15 + 0.75 Ba(ClO4)2 + 2.25 Re2O7 + 0.375 O2 + 6.75 Ba	-0.2992706169097259	-0.22852652391026052	-0.044148595850532324
Ba3Sr9Al4(O4F)4	0.2415724028768269	2.9083017680555137	0.5217 Ba3Sr9Al4(O4F)4 + 5 Li -> Li5AlO4 + 0.2174 Ba4Al5 + 0.6957 BaF2 + 4.348 SrO + 0.3478 SrF2	0.5 Ba3Sr9Al4(O4F)4 -> Sr3Al2O6 + 0.75 BaO2 + 0.5 SrO + SrF2 + 0.75 Ba	-0.2786437734178824	-0.45058114139204175	-0.17742871370587876
Ba3SrEr2(MoO6)2	1.290987800833335	1.8038936254166733	Ba3SrEr2(MoO6)2 + 4 Li -> Ba3Er2MoO9 + 2 Li2O + SrO + Mo	2.667 Ba3SrEr2(MoO6)2 -> Ba3Er2MoO9 + 1.333 Sr2ErMoO6 + 3 BaMoO4 + Er2O3 + 2 Ba	-0.3461975695312516	-0.37518187613637277	-0.10989363889493475
Ba3SrMg2(TeO6)2	2.160827350833351	3.4100179962499877	1.714 Ba3SrMg2(TeO6)2 + 2 Li -> BaTeO3 + 0.2857 Li6TeO6 + 0.1429 Ba5Li2(TeO5)3 + 3.429 MgO + 1.714 Ba2SrTeO6	2 Ba3SrMg2(TeO6)2 -> Mg3TeO6 + 2 BaTeO4 + Sr2MgTeO6 + 2 O2 + 4 Ba	-0.30910441809374767	-0.29501384272728526	-0.07519613312511098
Ba3SrNb2O9	0.5063553458333356	3.2556254036667256	0.3333 Ba3SrNb2O9 + 3.333 Li -> BaO + 1.667 Li2O + 0.3333 SrO + 0.6667 Nb	1.333 Ba3SrNb2O9 -> BaO2 + 0.2667 Sr5Nb4O15 + 0.4 Ba5Nb4O15 + Ba	-0.2285566885937751	-0.3561398863306513	-0.09392127903597913
Ba3SrTa2O9	0.29318591683333484	3.229230334999964	0.2 Ba3SrTa2O9 + 2 Li -> Li2O + 0.6 BaO + 0.2 SrO + 0.4 Ta	Ba3SrTa2O9 -> BaSrTa2O7 + BaO2 + Ba	-0.17731473399621178	-0.34650440854841946	-0.098359631977182
Ba3Ta2CdO9	1.7315345989583606	3.4314064574166747	2.2 Ba3Ta2CdO9 + 2.4 Li -> BaCdO2 + 1.4 Ba4LiTa3O12 + 0.2 Li5TaO5 + 1.2 Cd	2 Ba3Ta2CdO9 -> BaTa2O6 + Ta2Cd2O7 + 2.5 O2 + 5 Ba	-0.19263853687501387	-0.3066309635784332	-0.06072501281815601
Ba3Ta2CoO9	1.7245898538141127	3.205795911875126	5.333 Ba3Ta2CoO9 + 8.667 Li -> Li6CoO4 + 1.333 Ba4Ta2O9 + 2.667 Ba4LiTa3O12 + 4.333 Co	3.333 Ba3Ta2CoO9 -> Co3O4 + 0.3333 BaCoO3 + 1.667 Ba5Ta4O15 + 1.333 Ba	-0.17725999779672463	-0.2996842132842863	-0.05348578130081494
Ba3Ta2MnO9	0.9112412918677171	2.9305338865624266	4 Ba3Ta2MnO9 + 8 Li -> Ba4Ta2O9 + 3 Li2O + 2 Ba4LiTa3O12 + 4 Mn	2 Ba3Ta2MnO9 -> Mn2O3 + Ba5Ta4O15 + Ba	-0.14001161305804644	-0.3048193037745124	-0.07845255080508196
Ba3Ta2NiO9	1.7829148658332596	3.4920889018750114	4 Ba3Ta2NiO9 + 8 Li -> Ba4Ta2O9 + 2 Ba4LiTa3O12 + 3 Li2O + 4 Ni	3 Ba3Ta2NiO9 -> Ni3O4 + 3 BaTa2O6 + 2.5 O2 + 6 Ba	-0.19392785753156838	-0.30117829906862825	-0.05810976705357973
Ba3Ta2ZnO9	1.5393422304165894	3.3649686624999973	42 Ba3Ta2ZnO9 + 28 Li -> BaZn13 + 13 BaZnO2 + 28 Ba4LiTa3O12 + 16 ZnO	2 Ba3Ta2ZnO9 -> Ba5Ta4O15 + 0.5 O2 + 2 ZnO + Ba	-0.1822877464426198	-0.30126397632352386	-0.0629177539492467
Ba3Ta4Ti4O21	1.5458820595833451	3.8160259703571033	2.25 Ba3Ta4Ti4O21 + Li -> Ba6Ta9Ti7O42 + 0.75 BaTi2O5 + 0.5 Li2TiO3	1.5 Ba3Ta4Ti4O21 -> BaTa6O16 + 6 TiO2 + 1.75 O2 + 3.5 Ba	-0.08241362280686637	-0.22857878536393783	-0.018908375873938343
Ba3Ta6(Si2O13)2	1.2634773302959796	4.079974440000124	Ba3Ta6(Si2O13)2 + 7.379 Li -> Ba3Ta5O15 + 0.1379 Li3TaO4 + 3.483 Li2SiO3 + 0.1724 Ta5Si3	0.25 Ba3Ta6(Si2O13)2 -> SiO2 + 0.75 Ta2O5 + 0.375 O2 + 0.75 Ba	-0.045418528799577196	-0.20836217508379562	-0.010597934119497054
Ba3Ta6Fe2O21	2.212964402552103	3.7908282064285137	3.2 Ba3Ta6Fe2O21 + 6.4 Li -> Ba4Ta10FeO30 + 5 LiTaO3 + 1.4 Ba4LiTa3O12 + 5.4 FeO	1.5 Ba3Ta6Fe2O21 -> BaTa6O16 + 3 TaFeO4 + 1.75 O2 + 3.5 Ba	-0.13303829869243167	-0.2297838489820685	-0.02152554365772774
Ba3TaAs3O	0.5027316807083588	1.1849164705541242	0.3333 Ba3TaAs3O + 1.333 Li -> BaLiAs + 0.06667 Li5TaO5 + 0.2667 Ta	1.957 Ba3TaAs3O -> BaAs3 + 1.435 TaAs2 + 0.1304 Ba5Ta4O15 + 4.217 Ba	-0.26451971929115903	-0.47306417702599557	-0.9354864225736823
Ba3TaFe3(SiO7)2	2.360206849583484	3.417005568928577	Ba3TaFe3(SiO7)2 + 2 Li -> Li2FeSiO4 + FeO + BaSiO3 + Ba2TaFeO6	0.75 Ba3TaFe3(SiO7)2 -> BaSiO3 + 0.125 Ba3Ta6(Si2O13)2 + 1.125 Fe2O3 + 0.4375 O2 + 0.875 Ba	-0.209826366120482	-0.2659127948101214	-0.041811871388865995
Ba3TaN3Cl2	0.20360430458333245	1.0541483604687543	Ba3TaN3Cl2 + 4 Li -> Li4TaN3 + BaCl2 + 2 Ba	3 Ba3TaN3Cl2 -> BaN3Cl + 1.5 Ba(TaN2)2 + 2.5 BaCl2 + 4 Ba	-0.3126059901162872	-0.5875652628813528	-0.6960346480479895
Ba3Tb(BO2)9	1.504727309427162	3.536464246874992	7.091 Ba3Tb(BO2)9 + 11.64 Li -> LiTb6B3O14 + 0.7273 B6O + 10.64 Ba2Li(BO2)5 + 1.091 Tb(BO2)3	Ba3Tb(BO2)9 -> Tb(BO2)3 + 1.5 BaB4O7 + 0.75 O2 + 1.5 Ba	-0.0579156194405579	-0.2339182369660202	-0.04024986458659363
Ba3Tb2(PS4)4	2.045708529166621	2.7985018218749973	0.6667 Ba3Tb2(PS4)4 + 2 Li -> LiTbS2 + 0.3333 TbPS4 + 0.3333 Li3PS4 + 2 BaPS3	1.143 Ba3Tb2(PS4)4 -> Ba3(PS4)2 + 1.286 P2S7 + 0.4286 BaS3 + 2.286 Tb	-2.2835420020905775e-14	-0.1716827631176414	-0.8887556654835482
Ba3Te2O9	2.987316865833418	3.3115194899997054	2 Ba3Te2O9 + 2 Li -> BaTeO3 + Ba5Li2(TeO5)3	0.5 Ba3Te2O9 -> BaTeO4 + 0.25 BaO2 + 0.25 Ba	-0.4033299574687499	-0.23531408153846778	-0.07523220710991785
Ba3Te3(BrO4)2	2.1733080373958344	3.325260058749978	0.6585 Ba3Te3(BrO4)2 + 1.366 Li -> BaTeO3 + 0.09756 BaTe3 + 0.6829 Li2TeO3 + 0.2195 Ba4Br6O	Ba3Te3(BrO4)2 -> BaTeO4 + BaBr2 + 2 TeO2 + Ba	-0.2761532208750008	-0.23276066856770683	-0.14290855779166423
Ba3Te4O11	2.431304563846167	3.0119965953125036	0.3333 Ba3Te4O11 + 0.4815 Li -> BaTeO3 + 0.03704 LiTe3 + 0.2222 Li2TeO3	1.4 Ba3Te4O11 -> BaTe4O9 + 1.6 BaTeO4 + 1.6 Ba	-0.3225152079882747	-0.2535579652822302	-0.1718117612499861
Ba3Tm(BO2)9	1.525113898724129	3.5255349836606724	16.5 Ba3Tm(BO2)9 + 16 Li -> B6O + 17.5 Ba(BO2)2 + 16 Ba2Li(BO2)5 + 5.5 Tm3B5O12	3 Ba3Tm(BO2)9 -> Tm3B5O12 + 5.5 BaB4O7 + 1.75 O2 + 3.5 Ba	-0.053406066732438084	-0.2317473976213571	-0.03854222931099027
Ba3Tm(BO3)3	0.865670337833409	3.411759506527764	0.6 Ba3Tm(BO3)3 + Li -> BaLiBO3 + 0.05 BaB6 + 0.25 Ba3(BO3)2 + 0.3 Tm2O3	0.6667 Ba3Tm(BO3)3 -> Ba(BO2)2 + 0.5 O2 + 0.3333 Tm2O3 + Ba	-0.11688611128766979	-0.3233407997059201	-0.06457155727511843
Ba3Tm4O9	0.30628183583330504	2.580897003333344	0.25 Ba3Tm4O9 + Li -> LiTmO2 + 0.25 BaO + 0.5 Ba	0.6667 Ba3Tm4O9 -> BaO2 + 1.333 Tm2O3 + Ba	-0.30205339074519433	-0.49332052427884765	-0.17662536150315145
Ba3V2O8	1.079861259833323	3.52444610875001	0.6667 Ba3V2O8 + 1.667 Li -> Ba2VO4 + 0.3333 LiVO2 + 0.6667 Li2O	Ba3V2O8 -> Ba2V2O7 + 0.5 O2 + Ba	-0.2674261477586115	-0.22099533556451378	-0.039564146288484814
Ba3V4(PO4)6	2.242538380000091	3.0222959724997955	2 Ba3V4(PO4)6 + 3 Li -> Li3V2(PO4)3 + 3 Ba2P2O7 + 3 V2PO5	2 Ba3V4(PO4)6 -> BaV2(P2O7)2 + 2 Ba2VP2O9 + 4 VPO4 + Ba	-0.10749986866078842	-0.15399464526711615	-0.18431885582126828
Ba3V4O13	3.1522494658337337	3.96355647666655	2 Ba3V4O13 + Li -> LiV2O5 + 3 Ba2V2O7	0.5 Ba3V4O13 -> BaV2O6 + 0.25 O2 + 0.5 Ba	-0.30559043808423736	-0.17817033577272912	-0.03504722746711053
Ba3V4PbO14	2.48124610447894	4.018029219166623	4 Ba3V4PbO14 + 2.4 Li -> V2Pb4O9 + 0.8 Li3VO4 + 6 Ba2V2O7 + 0.6 V2O3	0.5 Ba3V4PbO14 -> BaV2O6 + 0.5 PbO2 + 0.5 Ba	-0.3013082575750494	-0.18696566765248868	-0.03780414170139057
Ba3WCl2O5	1.3824787745833413	3.2817002924999983	5 Ba3WCl2O5 + 2 Li -> Ba5Li2(WO5)3 + 1.667 Ba2WO5 + 1.667 Ba4Cl6O + 0.3333 W	Ba3WCl2O5 -> BaWO4 + 0.875 BaCl2 + 0.125 Ba(ClO4)2 + Ba	-0.28747833901787123	-0.2640910394736835	-0.06801797751413474
Ba3WN4	0.2298424681250079	1.2227072214772734	Ba3WN4 + 6 Li -> Li6WN4 + 3 Ba	Ba3WN4 -> BaWN3 + 0.1667 BaN6 + 1.833 Ba	-0.3683040112648781	-0.6746996047754661	-0.6367652793588334
Ba3WO6	1.1476200724999104	2.572578992500077	3.333 Ba3WO6 + 2 Li -> Ba5Li2(WO5)3 + 5 BaO + 0.3333 W	2 Ba3WO6 -> BaO2 + 2 Ba2WO5 + Ba	-0.3775269218749986	-0.399945218522737	-0.14676881105188677
Ba3Y(BO3)3	0.8820430657084124	3.4376900686728153	0.6 Ba3Y(BO3)3 + Li -> BaLiBO3 + 0.05 BaB6 + 0.25 Ba3(BO3)2 + 0.3 Y2O3	6.667 Ba3Y(BO3)3 -> BaO10 + 3.333 Ba3Y2(B2O5)3 + 9 Ba	-0.12969017017361661	-0.3273738553431267	-0.06935456237474469
Ba3Y2(B2O5)3	1.040153718062463	3.4570583754167563	12 Ba3Y2(B2O5)3 + 40 Li -> Li6Y(BO3)3 + 34 BaLiBO3 + 23 YBO3 + 2 BaB6	0.5 Ba3Y2(B2O5)3 -> Ba(BO2)2 + YBO3 + 0.25 O2 + 0.5 Ba	-0.07671336963786501	-0.2688221551801764	-0.046179764476525165
Ba3Zn3Te(PO7)2	2.9388276079166697	3.8520083608333207	2 Li + Zn3TeO6 -> Li2TeO3 + 3 ZnO	3 Ba3Zn3Te(PO7)2 -> Zn3TeO6 + 3 BaZn2(PO4)2 + 2 BaTeO4 + 2 O2 + 4 Ba	-0.25857326812851067	-0.17615226680780882	-0.025208089838990144
Ba3Zn5In2O11	1.4287983688095118	2.865343319999978	4 Ba3Zn5In2O11 + 21 Li -> LiInO2 + 2 Li10Zn4O9 + 12 BaZnO2 + 7 In	0.6667 Ba3Zn5In2O11 -> BaO2 + 3.333 ZnO + 0.6667 In2O3 + Ba	-0.4220258388683429	-0.3396686164444489	-0.13049011801911625
Ba3Zn6Si4TeO20	2.871316547083401	3.6193649812499262	4 Ba3Zn6Si4TeO20 + 8 Li -> Ba3Te4O11 + 3 Ba2ZnSi2O7 + 3 BaZn2Si2O7 + 4 Li2ZnSiO4 + 11 ZnO	Ba3Zn6Si4TeO20 -> BaTeO4 + BaZn2Si2O7 + 2 Zn2SiO4 + 0.5 O2 + Ba	-0.27802159294483175	-0.22875455411018164	-0.041784036436367966
Ba3ZnB5PO14	1.892569934166662	3.7091605643749888	3 Ba3ZnB5PO14 + 6 Li -> Ba3(PO4)2 + 3 Ba2Li(BO2)5 + Li3PO4 + 3 Zn	2 Ba3ZnB5PO14 -> BaZn2(PO4)2 + 2.5 BaB4O7 + 1.25 O2 + 2.5 Ba	-0.0934580841747854	-0.21617173743531426	-0.02355494179997386
Ba3Zr2O7	0.1711460383333403	2.7212106150000324	Ba3Zr2O7 + 2 Li -> Ba + Li2O + 2 BaZrO3	2 Ba3Zr2O7 -> BaO2 + 4 BaZrO3 + Ba	-0.22325360725693777	-0.40605485010416853	-0.12085182413043238
Ba3Zr2S7	1.0807495880208204	2.220979784999992	1.5 Ba3Zr2S7 + 4 Li -> Zr3S4 + 2 Li2S + 4.5 BaS	0.5 Ba3Zr2S7 -> BaZrS3 + 0.25 BaS2 + 0.25 Ba	-0.012590225144229805	-0.3069568162499985	-0.7942938454044073
Ba4(PtO3)3	2.0825970425000326	3.147816381500036	Ba4(PtO3)3 + 6 Li -> Ba4PtO6 + 3 Li2O + 2 Pt	1.667 Ba4(PtO3)3 -> Ba5Pt2O9 + 3 PtO2 + 1.667 Ba	-0.5825470473958374	-0.38028276499999514	-0.1403131001313267
Ba4AgAuO6	2.21517010999999	2.7301219533333594	9 Ba4AgAuO6 + 12 Li -> Ag3Au + 4 Ba9(AuO6)2 + 6 Li2O + 6 Ag	Ba4AgAuO6 -> BaO2 + 0.5 Ba(AuO2)2 + BaAgO2 + 1.5 Ba	-0.5458620556875027	-0.49284590785714366	-0.22532695112165957
Ba4As2O	0.4364226683333614	0.8862652899999895	6.5 Ba4As2O + Li -> Ba20As13 + 6 BaO + 0.5 Li2O	1.5 Ba4As2O -> Ba4As3 + 1.5 BaO + 0.5 Ba	-0.4156577037562119	-0.6411663317730398	-0.8472005099999993
Ba4Bi3F17	2.5362472944447854	5.626368742500018	0.1111 Ba4Bi3F17 + Li -> LiF + 0.4444 BaF2 + 0.3333 Bi	0.5 Ba4Bi3F17 -> BaBiF7 + 0.5 BiF3 + Ba	-0.11687407736779098	-0.10829638538192254	-0.06703379654167518
Ba4Br6O	2.220446049250313e-15	3.1636048608333285	Li -> Li	6 Ba4Br6O -> Ba(BrO3)2 + 17 BaBr2 + 6 Ba	-0.09767422341345977	-0.2245393958823545	-0.07199683486282904
Ba4CaV4Cu2F28	4.212037414166573	4.586841117499986	1.667 Ba4CaV4Cu2F28 + 2 Li -> Ba2V2CuF12 + 1.667 Ba2CaV2CuF14 + 0.3333 Ba2VCu2F12 + Li2VF6 + 0.6667 BaF2	Ba4CaV4Cu2F28 -> VF4 + Ba2VCu2F12 + 2 VF5 + CaF2 + 2 Ba	-0.191437815028479	-0.0863610001098607	-0.1994545291297496
Ba4CeMn3O12	1.8224288566665834	3.275797337500014	1.333 Ba4CeMn3O12 + Li -> Ba4Mn3O10 + LiMnO2 + 1.333 BaCeO3	0.5 Ba4CeMn3O12 -> BaMnO3 + 0.25 Ba3Mn2O8 + 0.5 CeO2 + 0.25 Ba	-0.40619647924320246	-0.3059078769507635	-0.10844740367112715
Ba4Cl6O	1.1546319456101628e-14	3.0332563374999824	Li -> Li	8 Ba4Cl6O -> Ba(ClO4)2 + 23 BaCl2 + 8 Ba	-0.12137617399038625	-0.23843866550000126	-0.09257024467076924
Ba4Co(ReO6)2	2.438096375833332	3.098689877500008	0.5 Ba4Co(ReO6)2 + Li -> Ba2LiReO6 + 0.5 Co	1.5 Ba4Co(ReO6)2 -> Ba5Re3O16 + 0.5 Co3O4 + Ba	-0.34233667622092945	-0.3057904145714261	-0.0734197464373203
Ba4Ga2O7	0.9949160532380699	2.656805998333337	1.214 Ba4Ga2O7 + 5 Li -> Li5GaO4 + 4.5 BaO + 0.3571 BaGa4	0.8 Ba4Ga2O7 -> BaO2 + 0.4 Ba3Ga4O9 + Ba	-0.3841274390663605	-0.4726811664080488	-0.18374607645684948
Ba4GeAs4	0.7426434052083302	1.0516750839583298	Ba4GeAs4 + 2 Li -> Ba2GeAs2 + 2 BaLiAs	Ba4GeAs4 -> Ba2GeAs2 + BaAs2 + Ba	-0.2644534731392427	-0.5214915047416042	-0.9177813540298365
Ba4I6O	2.220446049250313e-15	2.6899710007812283	Li -> Li	0.3429 Ba4I6O -> BaI2 + 0.02857 Ba5(IO6)2 + 0.2286 Ba	-0.09651426149037601	-0.21969552176470364	-0.24710214834351474
Ba4InAgS6	1.7519614141666366	2.2200401014815108	Ba4InAgS6 + Li -> LiInS2 + Ag + 4 BaS	8 Ba4InAgS6 -> Ba2Ag8S7 + 12.5 BaS2 + 4 Ba(InS2)2 + 13.5 Ba	-0.03198255792499394	-0.27779694589285375	-0.7098428058615931
Ba4LiCu(CO5)2	2.0565062133333893	3.0967967445832207	Ba4LiCu(CO5)2 + Li -> Ba2CuO3 + 2 BaCO3 + Li2O	2 Ba4LiCu(CO5)2 -> Ba2Cu2O5 + BaO2 + 4 BaCO3 + BaO + 2 Li	-0.2943973161458113	-0.3124039080960639	-0.1434991384407942
Ba4LiMo2N7	0.6827133958333367	1.9646294982005144	2.4 Ba4LiMo2N7 + 3.6 Li -> Li6MoN4 + 3.2 Ba3MoN4 + 0.6 Mo	20.55 Ba4LiMo2N7 -> Mo15N16 + 26.09 Ba3MoN4 + 3.909 BaN6 + 20.55 Li	-0.30934699137153165	-0.6133691286374732	-0.5864428074235395
Ba4LiNb3O12	0.5593827333333721	3.646478878494573	5 Ba4LiNb3O12 + 6 Li -> Li8Nb2O9 + 5 Ba4Nb2O9 + 3 LiNbO2	1.333 Ba4LiNb3O12 -> Ba5Nb4O15 + 0.3333 BaO2 + 0.04167 LiO8 + 1.292 Li	-0.19069321780317594	-0.29960665000453046	-0.06099997664850143
Ba4LiTa3O12	0.31256266733335636	3.838350853645827	Ba4LiTa3O12 + 5 Li -> Ba4Ta2O9 + 3 Li2O + Ta	4.571 Ba4LiTa3O12 -> BaO2 + 3.429 Ba5Ta4O15 + 0.1429 BaO10 + 4.571 Li	-0.1360602095783836	-0.30799598786962434	-0.05979574317024783
Ba4LiW2N7	0.6444888844444492	2.0051397495832792	2.4 Ba4LiW2N7 + 3.6 Li -> Li6WN4 + 3.2 Ba3WN4 + 0.6 W	Ba4LiW2N7 -> BaWN3 + Ba3WN4 + Li	-0.2986959430821088	-0.6147593334899994	-0.6156929414066115
Ba4Mg(SiN3)2	0.2384573029166539	0.37424162765625774	Ba4Mg(SiN3)2 + 2.25 Li -> LiMgN + 0.75 Ba3N + 0.25 Li5SiN3 + 1.75 BaSiN2	1.5 Ba4Mg(SiN3)2 -> BaN2 + 0.5 Mg3N2 + 3 BaSiN2 + 2 Ba	-0.5007479825815055	-0.7632246961111124	-0.9237356348459058
Ba4MgTa10O30	1.643880128333464	3.787973891250018	0.75 Ba4MgTa10O30 + Li -> Ba3Ta5O15 + 0.75 MgTa2O6 + LiTaO3	0.75 Ba4MgTa10O30 -> BaTa6O16 + 0.75 MgTa2O6 + O2 + 2 Ba	-0.07617369485780312	-0.22839165384444549	-0.021883711264483185
Ba4Mn3O10	1.7412104100002566	2.7995087474999463	0.3333 Ba4Mn3O10 + Li -> LiMnO2 + 1.333 BaO	4 Ba4Mn3O10 -> Ba3Mn2O8 + 2 Ba6Mn5O16 + Ba	-0.40616861705054585	-0.3408892797727905	-0.14258389383767556
Ba4MnGa2(S3F2)2	1.391803366369051	2.411836098749997	2.333 Ba4MnGa2(S3F2)2 + 9.333 Li -> Ba3(GaS3)2 + 1.667 Ba2MnS3 + 0.6667 MnGa4 + 9.333 LiF + 3 BaS	Ba4MnGa2(S3F2)2 -> Ba(GaS2)2 + MnS2 + 2 BaF2 + Ba	-0.052311094656501744	-0.16072882181817727	-0.6572424665561376
Ba4Na(BN2)3	0.2992386384482771	0.8090938740517326	0.75 Ba4Na(BN2)3 + 0.75 Li -> Ba3(BN2)2 + 0.25 Li3BN2 + 0.75 Na	0.8 Ba4Na(BN2)3 -> Ba3(BN2)2 + 0.2 BaN2 + 0.4 BN + 0.8 Na	-0.46003682466346163	-0.7324839329687509	-0.8102858518119289
Ba4Na(BO3)3	0.5091744642815426	3.3293092603015677	Ba4Na(BO3)3 + Li -> Ba3(BO3)2 + BaLiBO3 + Na	2 Ba4Na(BO3)3 -> Ba2B2O5 + Ba5B4O11 + BaO2 + 2 Na	-0.17587831924648167	-0.3541247352139685	-0.094999548405172
Ba4Na2W2O11	1.0588816852777532	3.1419406684266917	2 Ba4Na2W2O11 + 18 Li -> Na4WO5 + 9 Li2O + 8 BaO + 3 W	2 Ba4Na2W2O11 -> BaO2 + 3.5 Ba2WO5 + 0.5 Na4WO5 + 2 Na	-0.3287852645274394	-0.33366467424419977	-0.09028651690751843
Ba4NaAl2B8(BrO6)3	1.137436276033386	3.642858512724328	0.5 Ba4NaAl2B8(BrO6)3 + 1.695 Li -> LiAlO2 + 0.6949 Ba2Li(BO2)5 + 0.01695 Ba3B(BrO)3 + 0.08475 BaB6 + 0.5 NaBr + 0.4746 BaBr2	1.184 Ba4NaAl2B8(BrO6)3 -> BaNa(B3O5)3 + 0.4737 Al5BO9 + 0.3421 Ba(BrO3)2 + 0.1842 NaBr + 1.342 BaBr2 + 2.053 Ba	-0.030891262973975486	-0.22308583770369195	-0.051067966139572096
Ba4NaAl2B8(ClO6)3	1.1114746816166599	3.658499599765597	0.7195 Ba4NaAl2B8(ClO6)3 + 2.439 Li -> Ba2Li(BO2)5 + 0.00813 Ba5B3ClO9 + 1.439 LiAlO2 + 0.7154 BaCl2 + 0.7195 NaCl + 0.122 BaB6	2.5 Ba4NaAl2B8(ClO6)3 -> Al5BO9 + 1.577 BaNa(B3O5)3 + 0.9231 NaClO4 + 2.808 BaCl2 + 0.9615 Ba2B5ClO9 + 3.692 Ba	-0.029381412350889313	-0.22287264004031382	-0.04817833821146733
Ba4NaCu(CO5)2	1.85500349333336	2.90283936249996	Ba4NaCu(CO5)2 + 2 Li -> NaCuO + 2 BaCO3 + Li2O + 2 BaO	Ba4NaCu(CO5)2 -> NaCuO2 + BaO2 + 2 BaCO3 + Ba	-0.29443811163393674	-0.3131860466605376	-0.1378631227419138
Ba4NaGa2B8(BrO6)3	1.6503570020370502	3.6811938491666454	0.75 Ba4NaGa2B8(BrO6)3 + 2.25 Li -> Ba2Li(BO2)5 + 0.75 LiGaO2 + 0.1667 BaNaLi3(BO2)6 + 0.5833 NaBr + 0.8333 BaBr2 + 0.75 Ga	1.125 Ba4NaGa2B8(BrO6)3 -> BaNa(B3O5)3 + 0.3125 Ba(BrO3)2 + 0.125 NaBr + 1.125 Ga2O3 + 1.313 BaBr2 + 1.875 Ba	-0.09289436180804334	-0.2171988379687506	-0.053575987485723786
Ba4NaGa2B8(ClO6)3	1.6424079216666856	3.6938184889582697	2.5 Ba4NaGa2B8(ClO6)3 + 6 Li -> Ba2B5ClO9 + 2 BaCl2 + 3 Ba2Li(BO2)5 + 2.5 NaCl + 3 LiGaO2 + 2 Ga	1.529 Ba4NaGa2B8(ClO6)3 -> BaNa(B3O5)3 + 0.6471 Ba2B5ClO9 + 1.706 BaCl2 + 0.5294 NaClO4 + 1.529 Ga2O3 + 2.118 Ba	-0.09139108388595663	-0.2142059057118051	-0.05061353190711415
Ba4Nb2(OF4)3	2.2008102675640657	4.496120689166704	6 Ba4Nb2(OF4)3 + 26 Li -> BaNb8O14 + 4 NbO + 23 BaF2 + 26 LiF	2.5 Ba4Nb2(OF4)3 -> Ba5Nb3O3F20 + 2 NbF5 + 2.25 O2 + 5 Ba	-0.11484767598118051	-0.13390623309387517	-0.0693003894256794
Ba4Nb2WO12	1.9706220933333616	3.3075942175000033	3.75 Ba4Nb2WO12 + 4.5 Li -> Ba5Li2(WO5)3 + 2.5 Ba4LiNb3O12 + 0.75 W	2 Ba4Nb2WO12 -> Ba5Nb4O15 + 2 BaWO4 + 0.5 O2 + Ba	-0.25644341821094496	-0.2800727219379704	-0.05347512513765995
Ba4NbFeO8	1.3617556049999822	2.7321161337499857	0.5 Ba4NbFeO8 + 1.5 Li -> BaO + 0.75 Li2O + 0.25 Ba4Nb2O9 + 0.5 Fe	Ba4NbFeO8 -> Ba2NbFeO6 + BaO2 + Ba	-0.3305501274725908	-0.41879826160416167	-0.15758055248931546
Ba4Nd4Zn3PtO15	2.3245874133334894	2.7700742761110577	0.3333 Ba4Nd4Zn3PtO15 + 0.1667 Li -> BaZnO2 + 0.08333 Li2PtO3 + 0.08333 Ba4(PtO3)3 + 0.6667 Nd2O3	2 Ba4Nd4Zn3PtO15 -> Ba5Pt2O9 + 1.5 BaO2 + 6 ZnO + 4 Nd2O3 + 1.5 Ba	-0.41274759545307393	-0.44463682427859164	-0.16602877877639077
Ba4P3	0.6064172345833505	0.5503000400000119	Ba4P3 + Li -> BaLiP + Ba3P2	1.333 Ba4P3 -> Ba5P4 + 0.3333 Ba	-0.39058706947819233	-0.6372708562665024	-1.3284454424583472
Ba4P3HF24	2.7232172326666824	6.278098417934753	Ba4P3HF24 + 15 Li -> LiHF2 + 14 LiF + 4 BaF2 + 3 P	0.3333 Ba4P3HF24 -> PF5 + 0.05556 BaH6F8 + 1.278 F2 + 1.278 Ba	-0.12139456337240517	-0.08466618121795433	-0.2199195862723342
Ba4PdO6	2.2654045533333527	2.902129890833326	Ba4PdO6 + 2 Li -> Ba2PdO3 + 2 BaO + Li2O	2 Ba4PdO6 -> Ba(PdO2)2 + 4 BaO2 + 3 Ba	-0.5666379934523729	-0.5122875355555552	-0.23584396822404452
Ba4PtO6	1.9534345895833265	2.6575403694444297	0.25 Ba4PtO6 + Li -> BaO + 0.5 Li2O + 0.25 Pt	2 Ba4PtO6 -> Ba5Pt2O9 + 1.5 BaO2 + 1.5 Ba	-0.5490394883333343	-0.5154665605555384	-0.22166794794118694
Ba4Re2NiO12	2.66393026333338	3.1243793450000394	0.5 Ba4Re2NiO12 + Li -> Ba2LiReO6 + 0.5 Ni	1.5 Ba4Re2NiO12 -> Ba5Re3O16 + 0.25 BaNiO3 + 1.25 NiO + 0.75 Ba	-0.3648012231637221	-0.3138893409999879	-0.09148215769869772
Ba4Sc2Cu2O9	2.376095268333305	2.4309907454166546	Ba4Sc2Cu2O9 + Li -> Ba2CuO3 + Ba2ScCuO4 + LiScO2	Ba4Sc2Cu2O9 -> Ba2Cu2O5 + BaSc2O4 + Ba	-0.3895050211637834	-0.44334228549999066	-0.1796528282495391
Ba4ScReWO12	1.7215104183331387	3.4148777217968886	Ba4ScReWO12 + Li -> Ba2WO5 + 0.5 Ba2LiReO6 + 0.5 Ba2ScReO6 + 0.5 LiScO2	3 Ba4ScReWO12 -> Ba5Re3O16 + 3 BaWO4 + 1.5 Sc2O3 + 1.75 O2 + 4 Ba	-0.30720130264844103	-0.3078428052564024	-0.06274304925204355
Ba4SiAs4	0.5906794470833427	1.136072606388887	0.25 Ba4SiAs4 + Li -> BaLiAs + 0.25 Si	2 Ba4SiAs4 -> Ba3(SiAs2)2 + 2 BaAs2 + 3 Ba	-0.25733334819182385	-0.5476831070999955	-1.030567417493738
Ba4SiP4	0.5460176502083374	1.0233419209091013	0.25 Ba4SiP4 + Li -> BaLiP + 0.25 Si	1.6 Ba4SiP4 -> Ba3P4 + 0.4 Ba3(Si2P3)2 + 2.2 Ba	-0.27687156153639103	-0.5832644030999947	-1.3618614847277393
Ba4Sr2La2Co4O15	1.8518557723333133	2.4446451675000316	Ba4Sr2La2Co4O15 + 6.667 Li -> BaLa2O4 + 0.6667 Li10Co4O9 + 3 BaO + 2 SrO + 1.333 Co	0.5 Ba4Sr2La2Co4O15 -> SrLaCoO4 + 0.5 Ba2CoO4 + 0.5 BaCoO3 + 0.5 Ba	-0.4529524830730436	-0.4390606729497626	-0.1897526774236198
Ba4Sr2Nd2Co4O15	1.8661418221333381	2.4376519417500244	Ba4Sr2Nd2Co4O15 + 5.556 Li -> BaNd2CoO5 + 0.5556 Li10Co4O9 + 3 BaO + 2 SrO + 0.7778 Co	3 Ba4Sr2Nd2Co4O15 -> Sr6(CoO3)5 + 7 BaCoO3 + 3 Nd2O3 + 5 Ba	-0.4515000940170504	-0.44360388837302134	-0.1823510867693825
Ba4Sr2Sm2Co4O15	1.8726145915333365	2.4390908276250283	Ba4Sr2Sm2Co4O15 + 5.556 Li -> BaSm2CoO5 + 0.5556 Li10Co4O9 + 3 BaO + 2 SrO + 0.7778 Co	3 Ba4Sr2Sm2Co4O15 -> Sr6(CoO3)5 + 7 BaCoO3 + 3 Sm2O3 + 5 Ba	-0.44846369389286345	-0.4367488013888976	-0.1803491837814395
Ba4Ta10CoO30	2.4124260225001506	3.8392130091666616	0.25 Ba4Ta10CoO30 + 0.5 Li -> BaTa2O6 + 0.5 LiTaO3 + 0.25 Co	Ba4Ta10CoO30 -> BaTa6O16 + 2 BaTa2O6 + CoO2 + Ba	-0.08844861868914133	-0.2247065037555671	-0.023931241535577463
Ba4Ta10FeO30	2.1026517350001095	3.237416462708366	0.25 Ba4Ta10FeO30 + 0.5 Li -> BaTa2O6 + 0.5 LiTaO3 + 0.25 Fe	2 Ba4Ta10FeO30 -> Ba3Ta6Fe2O21 + 1.5 BaTa6O16 + 2.5 BaTa2O6 + Ba	-0.08730944646163863	-0.22518148397781568	-0.02869077970456413
Ba4Ta2O9	0.3101985173333306	2.9601904416667812	0.25 Ba4Ta2O9 + 2.5 Li -> BaO + 1.25 Li2O + 0.5 Ta	1.333 Ba4Ta2O9 -> BaO2 + 0.6667 Ba5Ta4O15 + Ba	-0.1940046055113691	-0.3615987987096734	-0.10637317653046185
Ba4Ti13O30	1.6712675503334538	3.624671918437534	0.6667 Ba4Ti13O30 + 1.111 Li -> BaTi2O5 + 0.5556 BaLi2Ti6O14 + 0.5556 Ba2Ti6O13	0.07692 Ba4Ti13O30 -> TiO2 + 0.1538 O2 + 0.3077 Ba	-0.10006897104100254	-0.23749231721556852	-0.02795421734846215
Ba4Ti2PtO10	2.4126603533333464	3.302365134062433	0.5 Ba4Ti2PtO10 + 0.6667 Li -> Ba2TiO4 + 0.3333 Li2PtO3 + 0.1667 Pt	1.667 Ba4Ti2PtO10 -> PtO2 + 0.6667 Ba6Ti5PtO18 + 1.333 O2 + 2.667 Ba	-0.3279381914725725	-0.3443784714634113	-0.10591079822006799
Ba4TiAs4	0.42217908719270625	1.0503380317500264	5 Ba4TiAs4 + 11.43 Li -> Ti5As3 + 11.43 BaLiAs + 0.4286 Ba20As13	0.6667 Ba4TiAs4 -> BaAs2 + 0.6667 TiAs + 1.667 Ba	-0.307794725745413	-0.5448703387916003	-1.0040663504592864
Ba4TiP4	0.5196977759895951	0.7865704021428447	1.75 Ba4TiP4 + 4 Li -> Ba3P2 + 0.25 Ti7P4 + 4 BaLiP	1.333 Ba4TiP4 -> Ba3P4 + 1.333 TiP + 2.333 Ba	-0.3372777354514813	-0.5800610238701738	-1.3505818865951034
Ba4W(N2Cl)2	0.1881085208333354	1.262720305806454	Ba4W(N2Cl)2 + 6 Li -> Li6WN4 + BaCl2 + 3 Ba	1.2 Ba4W(N2Cl)2 -> BaN3Cl + 0.6 W2N3 + 0.7 BaCl2 + 3.1 Ba	-0.29654984268750306	-0.5968328095855542	-0.5470000566710076
Ba4Y3F17	0.3521690411115186	6.213718395000104	0.1111 Ba4Y3F17 + Li -> LiF + 0.4444 BaF2 + 0.3333 Y	0.3333 Ba4Y3F17 -> BaYF5 + 0.2222 BaF3 + 0.1111 Ba	-0.05355127569853835	-0.1101970104513823	-0.02193738412500279
Ba4Zn4B14Pb2O31	2.22856115525628	3.42548272354156	3 Ba4Zn4B14Pb2O31 + 6.5 Li -> BaLi(B3O5)3 + 2.75 Zn2B2PbO6 + 5.5 Ba2Li(BO2)5 + 6.5 ZnO + 3.25 Pb	0.5 Ba4Zn4B14Pb2O31 -> PbO2 + 0.5 Zn4B6O13 + BaB4O7 + Ba	-0.15698244645254178	-0.22147089779185847	-0.033849881605718224
Ba5(TiN3)2	0.2999163278333494	0.5906640949999992	0.2 Ba5(TiN3)2 + 2 Li -> Ba + 0.4 Li5TiN3	0.5 Ba5(TiN3)2 -> BaN2 + TiN + 1.5 Ba	-0.546502548617787	-0.8169966330832246	-0.9058745817101368
Ba5As3ClO12	1.283392703750019	3.8425810637500013	6 Ba5As3ClO12 + 108 Li -> Ba4Cl6O + 9 BaAs2 + 54 Li2O + 17 BaO	3.2 Ba5As3ClO12 -> BaCl2 + 4.8 Ba2As2O7 + 0.6 Ba(ClO4)2 + 4.8 Ba	-0.25681933290278147	-0.19330401483869442	-0.016622884778918046
Ba5B3ClO9	0.2728626298584804	3.2626143066666855	0.3396 Ba5B3ClO9 + Li -> BaLiBO3 + 0.003145 BaB6 + 0.0566 Ba4Cl6O + 0.4686 Ba	0.6667 Ba5B3ClO9 -> Ba(BO2)2 + 0.08333 BaCl2 + 0.25 Ba(ClO4)2 + 2 Ba	-0.15949643875970132	-0.3400085025000079	-0.09931228399561975
Ba5B4O11	1.0408680013332643	3.346495057499939	0.9 Ba5B4O11 + Li -> BaLiBO3 + 1.15 Ba3(BO3)2 + 0.05 BaB6	0.5 Ba5B4O11 -> Ba2B2O5 + 0.25 BaO2 + 0.25 Ba	-0.1642749293607313	-0.3380234129166575	-0.08917201022004573
Ba5Cr3O12F	2.0672232653333253	2.625425304999935	0.4444 Ba5Cr3O12F + 1.667 Li -> Ba2CrO4 + 0.3333 LiCrO2 + 0.6667 Li2O + 0.2222 BaF2	0.3333 Ba5Cr3O12F -> BaCrO4 + 0.1667 BaF2 + 0.5 Ba	-1.6985292951111108	-0.2711140740131608	-1.9950350162953243
Ba5Cr3O13	2.299722948333268	2.5787201699999907	0.6667 Ba5Cr3O13 + 0.6667 Li -> Ba3Cr2O8 + 0.3333 Li2O + 0.3333 BaO	2 Ba5Cr3O13 -> BaO2 + 6 BaCrO4 + 3 Ba	-1.7845918519946866	-0.29556944602803714	-2.0178418201870576
Ba5Er2ZrAl2O13	0.2622791637583183	2.7965173008333166	1.1 Ba5Er2ZrAl2O13 + 10 Li -> BaZrO3 + 2 Li5AlO4 + 0.1 ZrAl2 + 1.1 Er2O3 + 4.5 Ba	Ba5Er2ZrAl2O13 -> BaAl2O4 + BaZrO3 + 1.5 BaO2 + Er2O3 + 1.5 Ba	-0.24221890495922338	-0.43735964963028184	-0.1382919921751795
Ba5Er8Ni4O21	1.8496880245834415	2.5714023840000118	0.125 Ba5Er8Ni4O21 + Li -> LiErO2 + 0.625 BaO + 0.5 Ni	0.4 Ba5Er8Ni4O21 -> BaNiO3 + 1.6 Er2O3 + 0.6 NiO + Ba	-0.3652877519303406	-0.44572224219339995	-0.16047940983072362
Ba5Ho2ZrAl2O13	0.2723064606021055	2.7667592729166928	0.575 Ba5Ho2ZrAl2O13 + 5 Li -> Li5AlO4 + 0.25 Ba3Zr2O7 + 0.075 ZrAl2 + 0.575 Ho2O3 + 2.125 Ba	Ba5Ho2ZrAl2O13 -> BaAl2O4 + BaZrO3 + 1.5 BaO2 + Ho2O3 + 1.5 Ba	-0.2464975532588367	-0.4346856219000066	-0.14070204574488132
Ba5Li2(TeO5)3	1.84782419372395	3.7954431783333624	0.875 Ba5Li2(TeO5)3 + 8 Li -> Ba2TeO + 2.375 BaO + 1.625 Li6TeO6	Ba5Li2(TeO5)3 -> Ba2LiTeO6 + Ba3Te2O9 + Li	-0.3534059941198988	-0.2629113600000217	-0.07997975781344069
Ba5Li2(WO5)3	1.1399855474999918	3.6237330919999606	0.1 Ba5Li2(WO5)3 + 1.8 Li -> Li2O + 0.5 BaO + 0.3 W	8 Ba5Li2(WO5)3 -> LiO8 + 8 BaWO4 + 16 Ba2WO5 + 15 Li	-0.3208521651477252	-0.2922062325510022	-0.06585598977117124
Ba5Lu2ZrAl2O13	0.2527829907886744	2.8605535254166523	0.5 Ba5Lu2ZrAl2O13 + 5.091 Li -> LiLuO2 + 0.8182 Li5AlO4 + 0.4091 BaZrO3 + 0.09091 ZrAl2 + 2.091 Ba	Ba5Lu2ZrAl2O13 -> BaAl2O4 + BaZrO3 + 1.5 BaO2 + Lu2O3 + 1.5 Ba	-0.23101309596538755	-0.4310908745598594	-0.1322198827748764
Ba5Mn3ClO12	2.5051838866666283	3.296105673333352	Ba5Mn3ClO12 + 3 Li -> Ba4Mn3O10 + 1.5 Li2O + 0.3333 BaO + 0.1667 Ba4Cl6O	0.3333 Ba5Mn3ClO12 -> BaMnO3 + 0.04167 BaCl2 + 0.125 Ba(ClO4)2 + 0.5 Ba	-0.452162614130208	-0.3162565557051287	-0.15053831476372803
Ba5Mn3O12F	2.516158996666663	3.3858085881818263	Ba5Mn3O12F + 3 Li -> Ba4Mn3O10 + 1.5 Li2O + 0.5 BaF2 + 0.5 BaO	2.667 Ba5Mn3O12F -> BaMn8O16 + 1.333 BaF2 + 8 O2 + 11 Ba	-0.44051336158321774	-0.2943556771955329	-0.13757510236929926
Ba5Mn5O14	2.097215117619143	2.0748255399999556	3 Ba5Mn5O14 + 1.75 Li -> Ba8Mn8O21 + 1.75 LiMnO2 + 1.75 Ba4Mn3O10	0.2273 Ba5Mn5O14 -> BaMnO3 + 0.04545 Mn3O4 + 0.1364 Ba	-0.3850251794106829	-0.32840865802631036	-0.1381676851615845
Ba5Nd8Mn4O21	1.0392547743678264	1.4979070737497988	0.25 Ba5Nd8Mn4O21 + 2 Li -> BaNd2O4 + Li2O + 0.25 BaO + Mn	0.5 Ba5Nd8Mn4O21 -> BaNdMn2O5 + BaNd2O4 + 0.5 Nd2O3 + 0.5 Ba	-0.30539025828962885	-0.4783337946891999	-0.16544954482443508
Ba5Os3ClO15	2.4651219867306224	3.323677399444438	0.5106 Ba5Os3ClO15 + 1.106 Li -> Ba2LiOsO6 + 0.02128 Li5OsO6 + 0.2128 BaCl2 + 0.08511 Ba4Os6ClO18	8 Ba5Os3ClO15 -> BaCl2 + 3 Ba(ClO4)2 + 24 OsO4 + 36 Ba	-0.461987776305556	-0.2497991941761395	-0.06284370481417678
Ba5Os3NO18	2.8062556839999884	3.3849536458333356	0.4 Ba5Os3NO18 + 2 Li -> Ba2LiOsO6 + 0.2 Li5OsO6 + 0.2 N2	3.333 Ba5Os3NO18 -> BaO10 + 1.667 Ba(NO3)2 + 10 OsO4 + 14 Ba	-0.5174149520432669	-0.26171382305779733	-0.06735515640164769
Ba5P3BrO12	0.7180013763020743	3.7760148016666872	2 Ba5P3BrO12 + 48 Li -> Ba8P5Br + 23.5 Li2O + BaLiP + 0.5 Ba2Br2O	4 Ba5P3BrO12 -> Ba(BrO3)2 + BaBr2 + 6 Ba2P2O7 + 6 Ba	-0.07417528613888624	-0.17429480752632265	-0.016470232500018334
Ba5P3ClO12	0.7129834575724565	3.8375314816666863	0.08696 Ba5P3ClO12 + 2 Li -> Li2O + 0.04348 Ba5P4 + 0.08696 Ba2PCl + 0.04348 BaO	5.333 Ba5P3ClO12 -> Ba(ClO4)2 + 1.667 BaCl2 + 8 Ba2P2O7 + 8 Ba	-0.07165889799999503	-0.17262445526315773	-0.014624445459198387
Ba5P3O12F	0.7024172880555687	3.8581807433333353	1.333 Ba5P3O12F + 30 Li -> BaO + 15 Li2O + Ba5P4 + 0.6667 BaF2	2 Ba5P3O12F -> BaF2 + 3 Ba2P2O7 + 1.5 O2 + 3 Ba	-0.07600331765735158	-0.17312365950934705	-0.008324418364206831
Ba5P4	0.6632528520833407	0.7466357212500006	Ba5P4 + Li -> Ba4P3 + BaLiP	Ba5P4 -> Ba3P4 + 2 Ba	-0.37341285767990073	-0.6208877769906482	-1.3309737533974393
Ba5Pt2O9	2.092114808611001	3.15739936233332	1.143 Ba5Pt2O9 + 0.8571 Li -> Ba4PtO6 + 0.4286 Li2O + 0.4286 Ba4(PtO3)3	0.4 Ba5Pt2O9 -> BaO2 + 0.8 PtO2 + Ba	-0.5675083762569457	-0.45722779840276884	-0.1858192198672559
Ba5Re3BrO15	1.695859594724332	3.8535019711805494	3.273 Ba5Re3BrO15 + 12.09 Li -> Li5ReO6 + 7.091 Ba2LiReO6 + 0.5455 Ba4Br6O + 1.727 Re	2 Ba5Re3BrO15 -> Ba(BrO3)2 + 3 Re2O7 + 1.5 O2 + 9 Ba	-0.29748349452546385	-0.21721482467947517	-0.035405553630970754
Ba5Re3ClO15	1.7353507961905041	3.858048737610295	4 Ba5Re3ClO15 + 14 Li -> Li5ReO6 + 2 BaCl2 + 9 Ba2LiReO6 + 2 Re	4 Ba5Re3ClO15 -> BaRe2O9 + 2 Ba(ClO4)2 + 5 Re2O7 + 17 Ba	-0.3002325545949107	-0.21998568083331804	-0.04040296097697915
Ba5Re3IO15	1.7088083038972852	3.527976284057976	0.4615 Ba5Re3IO15 + 1.705 Li -> Ba2LiReO6 + 0.07692 Ba4I6O + 0.141 Li5ReO6 + 0.2436 Re	2 Ba5Re3IO15 -> Ba(IO3)2 + 2.182 Re2O7 + 0.5455 Ba5Re3O16 + 6.273 Ba	-0.2983095151736128	-0.23017749532607912	-0.08819902910932864
Ba5Re3NO18	2.6580017183333067	3.819085495069437	0.4 Ba5Re3NO18 + 2 Li -> Ba2LiReO6 + 0.2 Li5ReO6 + 0.2 N2	2 Ba5Re3NO18 -> Ba(NO3)2 + 3 Re2O7 + 4.5 O2 + 9 Ba	-0.35768851602285956	-0.21574480767857285	-0.05366681669644313
Ba5Re3O16	2.9013502658333294	3.7623063183333594	4 Ba5Re3O16 + 8 Li -> LiReO4 + 2 Ba3Re2O9 + 7 Ba2LiReO6	3 Ba2LiReO6 -> Ba5Re3O16 + BaO2 + 3 Li	-0.36569968557065113	-0.2798767650493401	-0.09544273316668939
Ba5Si(Br3O2)2	0.5091395164214951	3.332497958333336	3 Ba5Si(Br3O2)2 + 4.25 Li -> Li4SiO4 + 3 Ba4Br6O + 0.25 Ba2LiSi3 + 1.25 Ba2SiO4	Ba5Si(Br3O2)2 -> BaSiO3 + 0.1667 Ba(BrO3)2 + 2.833 BaBr2 + Ba	-0.08169628869485379	-0.24840167148437287	-0.05464059458544712
Ba5Si(Cl3O2)2	0.4612631058332397	3.2360618925000324	3 Ba5Si(Cl3O2)2 + 4.25 Li -> Li4SiO4 + 1.25 Ba2SiO4 + 0.25 Ba2LiSi3 + 3 Ba4Cl6O	Ba5Si(Cl3O2)2 -> BaSiO3 + 2.875 BaCl2 + 0.125 Ba(ClO4)2 + Ba	-0.09229216240809102	-0.2531985150000011	-0.0656444165656569
Ba5Sm8Mn4O21	1.0477223831178257	1.6259871829000416	0.25 Ba5Sm8Mn4O21 + 2 Li -> BaSm2O4 + Li2O + 0.25 BaO + Mn	2.6 Ba5Sm8Mn4O21 -> Ba8Mn8O21 + 10.4 Sm2O3 + 2.4 MnO + 5 Ba	-0.28628374125836586	-0.46553280157787214	-0.15813676196324433
Ba5SrLa2Fe4O15	1.481420839083343	2.77524876927083	Ba5SrLa2Fe4O15 + 7.5 Li -> BaLa2O4 + 1.5 Li5FeO4 + 4 BaO + SrO + 2.5 Fe	2 Ba5SrLa2Fe4O15 -> Sr2FeO4 + 3.8 Ba2FeO4 + 3.2 LaFeO3 + 0.4 La2O3 + 2.4 Ba	-0.3620153183372703	-0.4430539648544949	-0.15406700128006667
Ba5SrNd2Fe4O15	1.4886900014166764	2.8244838235833365	Ba5SrNd2Fe4O15 + 7.5 Li -> BaNd2O4 + 1.5 Li5FeO4 + 4 BaO + SrO + 2.5 Fe	0.4286 Ba5SrNd2Fe4O15 -> BaFeO3 + 0.2857 Nd3FeO6 + 0.2143 Ba2FeO4 + 0.2143 Sr2FeO4 + 0.7143 Ba	-0.3615591722051903	-0.44872626384920355	-0.14818536374779967
Ba5Ta2Cl2O9	0.2997749088333408	3.0652410291666845	0.2727 Ba5Ta2Cl2O9 + 2.727 Li -> BaO + 0.09091 Ba4Cl6O + 1.364 Li2O + 0.5455 Ta	5.333 Ba5Ta2Cl2O9 -> Ba(ClO4)2 + 2.667 Ba5Ta4O15 + 4.333 BaCl2 + 8 Ba	-0.16958620532986624	-0.32899914949074294	-0.10271945184444187
Ba5Ta4O15	1.3404384873334938	3.4083002574999886	0.8 Ba5Ta4O15 + Li -> Ba4LiTa3O12 + 0.2 Ta	0.5 Ba5Ta4O15 -> Ba2Ta2O7 + 0.25 O2 + 0.5 Ba	-0.13667406021930173	-0.30015380175595263	-0.058071174133361936
Ba5Tm2ZrAl2O13	0.25365130303332206	2.7633253787500673	0.55 Ba5Tm2ZrAl2O13 + 5 Li -> Li5AlO4 + 0.5 BaZrO3 + 0.05 ZrAl2 + 0.55 Tm2O3 + 2.25 Ba	Ba5Tm2ZrAl2O13 -> BaZrO3 + 0.5 Ba6Tm2Al4O15 + 0.5 BaO2 + 0.5 Tm2O3 + 0.5 Ba	-0.23804055309529737	-0.4354908016725356	-0.13609970565682472
Ba5Tm8Ni4O21	1.8925261645833604	2.5463012780000125	0.125 Ba5Tm8Ni4O21 + Li -> LiTmO2 + 0.625 BaO + 0.5 Ni	0.4 Ba5Tm8Ni4O21 -> BaNiO3 + 1.6 Tm2O3 + 0.6 NiO + Ba	-0.35790202443034236	-0.4451328682311342	-0.1588372051432243
Ba5V3ClO12	0.9320836675724773	3.6870758754166593	0.4615 Ba5V3ClO12 + 1.769 Li -> Ba2VO4 + 0.3846 LiVO2 + 0.6923 Li2O + 0.07692 Ba4Cl6O	0.6667 Ba5V3ClO12 -> Ba2V2O7 + 0.2083 BaCl2 + 0.125 Ba(ClO4)2 + Ba	-0.24443405527777218	-0.21444120963126823	-0.02608031428478297
Ba5V5O14	1.3042197014587824	1.225608375000023	0.4 Ba5V5O14 + 0.8 Li -> Ba2VO4 + 0.8 LiVO2 + 0.2 V	4.167 Ba5V5O14 -> BaV10O15 + 5.417 Ba3V2O8 + 3.583 Ba	-0.3074362667548032	-0.33352066714285566	-0.2866478917975206
Ba6Bi2(TeO6)3	2.443413520833275	3.215023683750033	2 Ba6Bi2(TeO6)3 + 2 Li -> BaTeO3 + Ba5Li2(TeO5)3 + 2 Ba3Bi2TeO9	0.5 Ba6Bi2(TeO6)3 -> BaBiO3 + 1.5 BaTeO4 + 0.5 Ba	-0.3812511756619297	-0.2898952681281992	-0.07944643078550229
Ba6CdAg2(SnS4)4	1.692358428999996	2.467886884374981	0.25 Ba6CdAg2(SnS4)4 + 2.5 Li -> BaSnS2 + 0.25 Ba2CdS3 + 1.25 Li2S + 0.5 Ag	Ba6CdAg2(SnS4)4 -> BaCdSnS4 + 2 SnS2 + BaAg2SnS4 + 1.333 BaS3 + 2.667 Ba	-0.01322651718562362	-0.18169287377358145	-0.716279152247688
Ba6Dy2Al4O15	0.25277229549998603	2.8473071800000413	0.3333 Ba6Dy2Al4O15 + 5 Li -> Li5AlO4 + 0.06667 Ba4Al5 + 0.3333 Dy2O3 + 1.733 Ba	0.5 Ba6Dy2Al4O15 -> BaAl2O4 + BaO2 + 0.5 Dy2O3 + Ba	-0.24809612064349906	-0.4356357323659048	-0.14278458207795675
Ba6Dy2Ga4O15	0.9605386862262142	2.86517240333328	Ba6Dy2Ga4O15 + 8.235 Li -> BaDy2O4 + 1.647 Li5GaO4 + 0.5882 BaGa4 + 4.412 BaO	Ba6Dy2Ga4O15 -> Ba3Ga4O9 + 1.5 BaO2 + Dy2O3 + 1.5 Ba	-0.32304000942214905	-0.40984717199735643	-0.13761739322642708
Ba6Er2Ga4O15	0.9555385181190692	2.875295799999944	Ba6Er2Ga4O15 + 8.235 Li -> BaEr2O4 + 1.647 Li5GaO4 + 0.5882 BaGa4 + 4.412 BaO	Ba6Er2Ga4O15 -> Ba3Ga4O9 + 1.5 BaO2 + Er2O3 + 1.5 Ba	-0.3198054139505113	-0.41675097615079215	-0.13563541040562788
Ba6Gd(ReO6)3	2.169281258333399	3.309130019999973	Ba6Gd(ReO6)3 + 2 Li -> Ba2GdReO6 + 2 Ba2LiReO6	4 Ba6Gd(ReO6)3 -> BaO2 + 4 Ba5Re3O16 + 2 Gd2O3 + 3 Ba	-0.32655493736895114	-0.31682448906250826	-0.08470726209365509
Ba6Gd2Al4O15	0.2518330321666318	2.8508294175000417	5 Ba6Gd2Al4O15 + 75 Li -> Ba4Al5 + 15 Li5AlO4 + 5 Gd2O3 + 26 Ba	0.5 Ba6Gd2Al4O15 -> BaAl2O4 + BaO2 + 0.5 Gd2O3 + Ba	-0.25371975574979366	-0.4313561347784809	-0.14209587667648504
Ba6Ho2Ga4O15	0.9600351189047833	2.865523965416616	Ba6Ho2Ga4O15 + 8.235 Li -> BaHo2O4 + 1.647 Li5GaO4 + 0.5882 BaGa4 + 4.412 BaO	Ba6Ho2Ga4O15 -> Ba3Ga4O9 + 1.5 BaO2 + Ho2O3 + 1.5 Ba	-0.32169613593159996	-0.4125122028174557	-0.13687850018864545
Ba6La2Co4O15	1.8911766363333822	1.9085724028125655	Ba6La2Co4O15 + 4 Li -> BaLa2O4 + 0.4 Li10Co4O9 + 5 BaO + 2.4 CoO	0.375 Ba6La2Co4O15 -> Ba2CoO4 + 0.375 La2O3 + 0.5 CoO + 0.25 Ba	-0.4613031341816063	-0.4554238091402034	-0.19678435591981946
Ba6La2Fe4O15	1.5088514937500022	2.6534110369791897	Ba6La2Fe4O15 + 7.5 Li -> BaLa2O4 + 1.5 Li5FeO4 + 5 BaO + 2.5 Fe	0.4167 Ba6La2Fe4O15 -> Ba2FeO4 + 0.6667 LaFeO3 + 0.08333 La2O3 + 0.5 Ba	-0.3876928689235224	-0.451147996759262	-0.17778498033630585
Ba6Lu2(WO6)3	1.1150605705555403	3.395287377500026	0.5 Ba6Lu2(WO6)3 + 9 Li -> LiLuO2 + 4 Li2O + 3 BaO + 1.5 W	3 Ba6Lu2(WO6)3 -> Lu6WO12 + 8 BaWO4 + 5 O2 + 10 Ba	-0.2993418383606601	-0.31846566157690326	-0.0606495072222617
Ba6Lu2Al4O15	0.25711317059523037	2.8508221159375404	0.5 Ba6Lu2Al4O15 + 7.875 Li -> LiLuO2 + 1.375 Li5AlO4 + 0.125 Ba4Al5 + 2.5 Ba	0.5 Ba6Lu2Al4O15 -> BaAl2O4 + BaO2 + 0.5 Lu2O3 + Ba	-0.24067316567948804	-0.43645250195401664	-0.13864955961632264
Ba6Lu2Ga4O15	0.9820225000865541	2.8440001295832835	0.5 Ba6Lu2Ga4O15 + 4.529 Li -> LiLuO2 + 0.7059 Li5GaO4 + 0.3235 BaGa4 + 2.676 BaO	Ba6Lu2Ga4O15 -> Ba3Ga4O9 + 1.5 BaO2 + Lu2O3 + 1.5 Ba	-0.31726653555423345	-0.4142211491666692	-0.1351958436163465
Ba6Mg7H26	0.5421612859421288	0.953489558749991	149 Ba6Mg7H26 + 299 Li -> LiMg149 + 298 BaLiH3 + 298 Ba2Mg3H10	0.4286 Ba6Mg7H26 -> Ba2Mg3H10 + 0.5714 H2 + 0.5714 Ba	-0.23291901854949826	-0.49440596463472697	-0.9538812420918421
Ba6Mn2Zn(ClF2)6	2.2929110783333755	3.8338894099999865	0.5 Ba6Mn2Zn(ClF2)6 + Li -> MnF2 + LiF + 3 BaClF + 0.5 Zn	2 Ba6Mn2Zn(ClF2)6 -> ZnCl2 + 2 BaMnF5 + 2 MnF2 + 10 BaClF + Zn	-0.08600147431673744	-0.11703251275700577	-0.11954868802270147
Ba6Mn5O16	2.2433945333334577	2.8331740774999856	2 Ba6Mn5O16 + Li -> LiMnO2 + 3 Ba4Mn3O10	2 Ba6Mn5O16 -> Ba3Mn2O8 + 8 BaMnO3 + Ba	-0.40031079983390194	-0.32131358612759264	-0.1258424021959863
Ba6Na2Mn2Nb2O17	2.8337163622955783	2.949729013114352	2.789 Ba6Na2Mn2Nb2O17 + 5.579 Li -> Ba4Mn3O10 + 2.579 Li2MnO3 + 0.4211 Ba4LiNb3O12 + 3.684 Ba3NaNbO6 + 0.6316 Na3NbO4	Ba6Na2Mn2Nb2O17 -> Ba3Mn2O8 + 0.7273 BaO2 + 0.4545 Ba5Nb4O15 + 0.1818 Na3NbO4 + 1.455 Na	-0.340180132878392	-0.34133837444670245	-0.139952160129587
Ba6Na2Nb2P2O17	0.7272944727111147	3.2205224543642585	0.6923 Ba6Na2Nb2P2O17 + 11.54 Li -> Ba3NaNbO6 + 0.3846 BaNaP + 5.769 Li2O + 0.3846 NbP + 0.1538 Ba5P4	16 Ba6Na2Nb2P2O17 -> BaO10 + 7 BaO2 + 8 Ba5Nb4O15 + 16 Ba3(PO4)2 + 32 Na	-0.15861179409272186	-0.28506177430327373	-0.0636931973968986
Ba6Na2Nb2V2O17	3.5855720433333715	3.1204695968643414	2 Li + 2 Ba5Nb4O15 + BaO2 -> Ba3Nb2O8 + 2 Ba4LiNb3O12	2.2 Ba6Na2Nb2V2O17 -> Ba5Nb4O15 + 2.2 Ba3V2O8 + 1.6 BaO2 + 0.4 Na3NbO4 + 3.2 Na	-0.26080597579689613	-0.3004265884836128	-0.07017330725765714
Ba6Na2Si4O15	0.705578860590184	3.2063650961350523	1.231 Ba6Na2Si4O15 + 3 Li -> NaLi3SiO4 + 0.1538 BaSi2 + 3.615 Ba2SiO4 + 1.462 Na	9 Ba6Na2Si4O15 -> BaO10 + 19 BaSiO3 + 17 Ba2SiO4 + 18 Na	-0.1439144319380059	-0.3419751814417986	-0.08441656983290047
Ba6Na2Ta2Mn2O17	2.8373028051754154	3.059668057801842	3.167 Ba6Na2Ta2Mn2O17 + 6.333 Li -> Na2MnO3 + 2.833 Li2MnO3 + 0.8333 Ba4Mn3O10 + 4.333 Ba3NaTaO6 + 0.6667 Ba4LiTa3O12	Ba6Na2Ta2Mn2O17 -> Ba3Mn2O8 + 0.8571 BaO2 + 0.2857 NaTaO3 + 0.4286 Ba5Ta4O15 + 1.714 Na	-0.3410439193863697	-0.33490261363219886	-0.14147714244296195
Ba6Na2Ta2V2O17	1.1771101073332986	3.026810204329522	11 Ba6Na2Ta2V2O17 + 30 Li -> Na3VO4 + 3 Ba3V2O8 + 15 LiVO2 + 3 Li5TaO5 + 19 Ba3NaTaO6	1.333 Ba6Na2Ta2V2O17 -> BaO2 + 0.2222 Na3VO4 + 1.222 Ba3V2O8 + 0.6667 Ba5Ta4O15 + 2 Na	-0.24393644728346064	-0.3091979326785754	-0.07702122958222368
Ba6NaCu3Te14	1.5001621166666599	2.0022930805000025	Ba6NaCu3Te14 + 9 Li -> NaLiTe + 4 Li2Te + 6 BaTe + 3 CuTe	Ba6NaCu3Te14 -> NaTe3 + 2.667 BaTe3 + 3 CuTe + 3.333 Ba	-0.033716044248363275	-0.23187691294115598	-0.5449542816760322
Ba6Nb4S13O3	1.8052937196634566	2.43362812179999	1.333 Ba6Nb4S13O3 + 7.429 Li -> Li3NbO4 + 0.619 Li5(NbS2)7 + 0.6667 Li2S + 8 BaS	2 Ba6Nb4S13O3 -> BaNb2O6 + 6 NbS3 + 2.667 BaS3 + 8.333 Ba	-0.03500903712727643	-0.21980993468073162	-0.7450644771387496
Ba6Nd2Fe4O15	1.5156879280833322	2.694017933124954	Ba6Nd2Fe4O15 + 7.5 Li -> BaNd2O4 + 1.5 Li5FeO4 + 5 BaO + 2.5 Fe	2.375 Ba6Nd2Fe4O15 -> Nd3FeO6 + 0.875 Ba2Nd2Fe4O11 + 5 Ba2FeO4 + 2.5 Ba	-0.38674899382917927	-0.4570457284523739	-0.16985104379561422
Ba6Nd2Y(MoO6)3	1.2700621598332744	1.7354505678126957	4 Ba6Nd2Y(MoO6)3 + 10 Li -> BaY2O4 + 2 Ba10Nd4Y(MoO6)5 + 5 Li2O + 3 BaO + 2 Mo	8 Ba6Nd2Y(MoO6)3 -> Ba3Y2MoO9 + 4 Ba10Nd4Y(MoO6)5 + 3 BaMoO4 + Y2O3 + 2 Ba	-0.35799637087720093	-0.39807949598484615	-0.12048969101449947
Ba6Pr2Co4O15	1.8999032738333934	1.8501283209375576	Ba6Pr2Co4O15 + 4 Li -> BaPr2O4 + 0.4 Li10Co4O9 + 5 BaO + 2.4 CoO	0.375 Ba6Pr2Co4O15 -> Ba2CoO4 + 0.375 Pr2O3 + 0.5 CoO + 0.25 Ba	-0.4614749595106771	-0.4549951363889124	-0.19033648177585505
Ba6Pr2Fe4O15	1.5016898777499974	2.7358890792707506	Ba6Pr2Fe4O15 + 7.5 Li -> BaPr2O4 + 1.5 Li5FeO4 + 5 BaO + 2.5 Fe	0.4167 Ba6Pr2Fe4O15 -> Ba2FeO4 + 0.6667 PrFeO3 + 0.08333 Pr2O3 + 0.5 Ba	-0.3886631869423871	-0.4518045424206316	-0.17078579943710315
Ba6Ru2Pt(ClO6)2	2.482564540555603	3.1562225025000052	2.444 Ba6Ru2Pt(ClO6)2 + Li -> Ba3LiRu2O9 + 1.444 Ba5Ru2Cl2O9 + 0.7778 Ba4(PtO3)3 + 0.3333 Ba4Cl6O + 0.1111 Pt	0.5 Ba6Ru2Pt(ClO6)2 -> BaRuO5 + 0.5 PtO2 + 0.5 BaCl2 + 1.5 Ba	-0.49784212530280714	-0.3359057948691846	-0.1380934048746254
Ba6Sn6Se13	1.491823257083329	2.0526827431249797	Ba6Sn6Se13 + 2 Li -> Li2Se + 6 BaSe + 6 SnSe	0.4286 Ba6Sn6Se13 -> Ba2SnSe4 + 1.571 SnSe + 0.5714 Ba	-0.020720007089031434	-0.17332808882616502	-0.562506233580893
Ba6Sn7S20	1.9401071702083215	2.395951752499998	0.5 Ba6Sn7S20 + 2 Li -> Ba3Sn2S7 + 0.5 Li4SnS4 + SnS	0.5 Ba6Sn7S20 -> BaS3 + 3.5 SnS2 + 2 Ba	-0.018376314307698483	-0.1841933761403487	-0.7385120944804235
Ba6Tb2Al4O15	0.2542115774166529	2.8419098728125407	0.3333 Ba6Tb2Al4O15 + 5 Li -> Li5AlO4 + 0.06667 Ba4Al5 + 0.3333 Tb2O3 + 1.733 Ba	0.5 Ba6Tb2Al4O15 -> BaAl2O4 + BaO2 + 0.5 Tb2O3 + Ba	-0.2503986135648626	-0.4409452415229902	-0.14356619742622456
Ba6Tb2Ga4O15	0.9654426789583566	2.8524089920832743	Ba6Tb2Ga4O15 + 8.235 Li -> BaTb2O4 + 1.647 Li5GaO4 + 0.5882 BaGa4 + 4.412 BaO	Ba6Tb2Ga4O15 -> Ba3Ga4O9 + 1.5 BaO2 + Tb2O3 + 1.5 Ba	-0.3251050937617892	-0.41742405900793234	-0.13932270087960408
Ba6Te10Br2O25	2.6167734392307693	3.167117064749887	0.5 Ba6Te10Br2O25 + 2.167 Li -> Li2TeO3 + 0.1667 LiTe3 + 0.5 Ba3Te4O11 + 0.5 Ba3Te3(BrO4)2	0.6364 Ba6Te10Br2O25 -> BaTe4O9 + 0.4545 BaTeO4 + 0.6364 Ba3Te3(BrO4)2 + 0.4545 Ba	-0.31032010918636743	-0.2330413753583942	-0.17485727598975753
Ba6Ti2Nb10Si8O51	1.854375705760777	3.6344006499997454	2.923 Ba6Ti2Nb10Si8O51 + 2.615 Li -> Ba2Ti(SiO4)2 + 0.6538 BaLi2Ti6O14 + 4.654 Ba3Nb6(Si2O13)2 + 0.9231 BaTi(SiO3)3 + 1.308 LiNbO2	0.6 Ba6Ti2Nb10Si8O51 -> Ba3Nb6(Si2O13)2 + 0.2667 BaTi(SiO3)3 + 0.9333 TiO2 + 0.1667 O2 + 0.3333 Ba	-0.12468184769853963	-0.21040734118077964	-0.017237292942622773
Ba6Ti5PtO18	2.6340697183333144	3.3500458842857084	1.333 Ba6Ti5PtO18 + 1.333 Li -> Ba4Ti2PtO10 + 0.6667 Li2TiO3 + 4 BaTiO3 + 0.3333 Pt	Ba6Ti5PtO18 -> PtO2 + 2.5 BaTi2O5 + 1.75 O2 + 3.5 Ba	-0.24032658967670262	-0.32460069499999555	-0.08371971285131297
Ba6Ti5S15O	1.8060741716665554	2.3631994867045325	0.3333 Ba6Ti5S15O + 0.25 Li -> Ba2TiS4 + 0.25 Li(TiS2)2 + 0.1667 TiO2	2 Ba6Ti5S15O -> BaS3 + 9 TiS3 + TiO2 + 11 Ba	-0.012334821733830381	-0.2690055348076943	-0.7857607196541685
Ba6Tm2Al4O15	0.25143266066665415	2.8523308106250367	0.3333 Ba6Tm2Al4O15 + 5 Li -> Li5AlO4 + 0.06667 Ba4Al5 + 0.3333 Tm2O3 + 1.733 Ba	0.5 Ba6Tm2Al4O15 -> BaAl2O4 + BaO2 + 0.5 Tm2O3 + Ba	-0.24350503837179716	-0.43866172206897014	-0.14057685415584853
Ba6Tm2Ga4O15	0.9588887913527913	2.872166915833278	0.5 Ba6Tm2Ga4O15 + 4.529 Li -> LiTmO2 + 0.7059 Li5GaO4 + 0.3235 BaGa4 + 2.676 BaO	Ba6Tm2Ga4O15 -> Ba3Ga4O9 + 1.5 BaO2 + Tm2O3 + 1.5 Ba	-0.3182438260259559	-0.4160706820238107	-0.1348528828773814
Ba6Y(ReO6)3	2.1708000708334256	3.328003498750005	0.5 Ba6Y(ReO6)3 + Li -> Ba2LiReO6 + 0.5 Ba2YReO6	Ba6Y(ReO6)3 -> Ba5Re3O16 + 0.25 BaO2 + 0.5 Y2O3 + 0.75 Ba	-0.323855615272167	-0.3347452029326945	-0.08381340358127298
Ba6Y2Al4O15	0.2527125270833186	2.8475313115625385	0.3333 Ba6Y2Al4O15 + 5 Li -> Li5AlO4 + 0.06667 Ba4Al5 + 0.3333 Y2O3 + 1.733 Ba	0.5 Ba6Y2Al4O15 -> BaAl2O4 + BaO2 + 0.5 Y2O3 + Ba	-0.24791664166632366	-0.44006377235632543	-0.14214435135186054
Ba6Y2Co4O15	1.7965822633333333	2.403124075312491	0.5 Ba6Y2Co4O15 + 1.667 Li -> Ba2YCoO5 + 0.1667 Li10Co4O9 + BaO + 0.3333 Co	0.25 Ba6Y2Co4O15 -> BaCoO3 + 0.25 Y2O3 + 0.5 Ba	-0.45042928632363033	-0.43399037583333566	-0.18502643490564497
Ba6Y2Fe4O15	1.4963494684166738	2.8982221223957816	0.5 Ba6Y2Fe4O15 + 1.875 Li -> Ba2YFeO5 + 0.375 Li5FeO4 + BaO + 0.625 Fe	0.25 Ba6Y2Fe4O15 -> BaFeO3 + 0.25 Y2O3 + 0.5 Ba	-0.377152534489559	-0.4349619464682557	-0.16652941849350444
Ba6Y2Ga4O15	0.9679259852262154	2.849539168749947	Ba6Y2Ga4O15 + 8.235 Li -> BaY2O4 + 1.647 Li5GaO4 + 0.5882 BaGa4 + 4.412 BaO	Ba6Y2Ga4O15 -> Ba3Ga4O9 + 1.5 BaO2 + Y2O3 + 1.5 Ba	-0.32395106404483975	-0.42064484297618954	-0.14380669830187953
Ba6Y2Ti4O17	0.7051496370833844	3.2528694331248733	Ba6Y2Ti4O17 + Li -> LiTiO2 + 3 Ba2TiO4 + Y2O3	0.25 Ba6Y2Ti4O17 -> BaTiO3 + 0.25 BaO2 + 0.25 Y2O3 + 0.25 Ba	-0.1948364393805333	-0.37531103496913376	-0.09600786918510718
Ba6Zn(InCl10)2	2.573187038611202	4.288942392083326	0.6667 Ba6Zn(InCl10)2 + Li -> InCl2 + 0.6667 BaZnCl4 + 0.3333 Li3InCl6 + 3.333 BaCl2	0.5 Ba6Zn(InCl10)2 -> InCl3 + 0.5 ZnCl2 + 3 Cl2 + 3 Ba	-0.07481375109366395	-0.10161306511999424	-0.08900221123529195
Ba7Al64O103	0.9831445399118763	3.6672491003571994	1.44 Ba7Al64O103 + 14 Li -> BaAl4 + 14 LiAl5O8 + 9.08 BaAl2O4	0.03125 Ba7Al64O103 -> Al2O3 + 0.1094 O2 + 0.2187 Ba	-0.04147022773114273	-0.3058748158063125	-0.028466432829006072
Ba7B4S13	1.4555909819444453	2.3568009782500083	0.1667 Ba7B4S13 + 2 Li -> Li2S + 1.167 BaS + 0.6667 B	0.6 Ba7B4S13 -> BaS3 + 1.2 Ba(BS2)2 + 2 Ba	-0.011930307874996604	-0.2963504851315766	-0.8084688849159478
Ba7B4Se13	1.7075864190277796	2.169122215999999	0.1429 Ba7B4Se13 + 1.714 Li -> BaSe + 0.8571 Li2Se + 0.5714 B	Ba7B4Se13 -> Ba2B4Se13 + 5 Ba	-0.04508854320513356	-0.23143411946264747	-0.7247715715705101
Ba7Ca2Mn5O20	2.451030184166763	3.1969243716666975	0.6 Ba7Ca2Mn5O20 + 1.2 Li -> Ba4Mn3O10 + 0.6 Li2O + 0.2 BaO + 1.2 CaO	0.5 Ba7Ca2Mn5O20 -> Ba3Mn2O8 + 0.1667 Ca2Mn3O8 + 0.6667 CaO + 0.5 Ba	-0.4092699711659722	-0.35783586023215364	-0.14644321982453867
Ba7Cu3H17	0.9079914450000093	0.870962399999957	0.3333 Ba7Cu3H17 + Li -> BaLiH3 + Cu + 1.333 BaH2	0.1176 Ba7Cu3H17 -> H2 + 0.3529 Cu + 0.8235 Ba	-0.24628081399455537	-0.4483222272323617	-0.8362090601939638
Ba7MnFe6F34	3.1745912350000047	3.8485904464658596	Ba7MnFe6F34 + 6 Li -> MnF2 + 6 LiF + 7 BaF2 + 6 FeF2	0.1667 Ba7MnFe6F34 -> BaFeF5 + 0.1111 BaMnF5 + 0.05556 BaF2 + 0.05556 Mn	-0.14345314547440857	-0.09482919831437941	-0.09119915528272982
Ba7Sc6Al2O19	0.3236870708333298	2.893089378541631	Ba7Sc6Al2O19 + 6 Li -> Ba4Al2O7 + 6 LiScO2 + 3 Ba	Ba7Sc6Al2O19 -> BaAl2O4 + 3 BaO2 + 3 Sc2O3 + 3 Ba	-0.24078075604399274	-0.42793579936362924	-0.14428641507411744
Ba7Sr5(MoN4)4	0.16597004789683412	1.2448355365464712	0.4286 Ba7Sr5(MoN4)4 + 6 Li -> Li6MoN4 + 3 Ba + 0.7143 Sr3MoN4	Ba7Sr5(MoN4)4 -> Sr5Mo2N7 + 0.1333 Mo15N16 + 1.144 BaN6 + 5.856 Ba	-0.3519159048296654	-0.6664830733119209	-0.6212065671217086
Ba8Al10B12O41	1.2366980144083048	3.4230071550001693	0.4762 Ba8Al10B12O41 + 2.381 Li -> Ba2Li(BO2)5 + 1.381 LiAlO2 + 1.69 BaAl2O4 + 0.119 BaB6	0.2 Ba8Al10B12O41 -> BaAl2B2O7 + 0.2 Ba(BO2)2 + 0.2 O2 + 0.4 Ba	-0.06025998294921564	-0.2826163862116542	-0.03817490644750521
Ba8B5N10F	0.1478178394999926	0.7734386695000036	0.2 Ba8B5N10F + 3 Li -> Li3BN2 + 0.1 BaF2 + 1.5 Ba	0.4 Ba8B5N10F -> BaN2 + 2 BN + 0.2 BaF2 + 2 Ba	-0.46558127468750277	-0.7278277039814829	-0.7992888395841602
Ba8P5Br	0.1417164443333333	0.7513480726666677	0.2 Ba8P5Br + Li -> BaLiP + 0.1 BaBr2 + 0.5 Ba	0.8 Ba8P5Br -> Ba3P4 + 0.4 BaBr2 + 3 Ba	-0.3897780546844978	-0.633496019431494	-1.2875267451851822
Ba8Sn4S15	1.6826295470833328	2.064744775625036	0.25 Ba8Sn4S15 + 1.5 Li -> BaSnS2 + 0.75 Li2S + BaS	0.2727 Ba8Sn4S15 -> Ba2SnS4 + 0.09091 SnS + 0.1818 Ba	-0.02799195936667065	-0.24312051148305258	-0.7414541145421852
Ba9(AuO6)2	2.1193762445833175	2.6967423228125	0.3333 Ba9(AuO6)2 + 2 Li -> Li2O + 3 BaO + 0.6667 Au	0.25 Ba9(AuO6)2 -> BaO2 + 0.25 Ba(AuO2)2 + Ba	-0.549128724237804	-0.5456877079090892	-0.2524993235246171
Ba9Ca3La4(Fe4O15)2	1.606104023916605	2.749366414583441	0.6667 Ba9Ca3La4(Fe4O15)2 + 2.5 Li -> Ba6La2Fe4O15 + 0.5 Li5FeO4 + 2 CaO + 0.3333 La2O3 + 0.8333 Fe	5 Ba9Ca3La4(Fe4O15)2 -> Ca2Fe2O5 + 20 LaFeO3 + 18 Ba2FeO4 + 13 CaO + 9 Ba	-0.3649156355626646	-0.4328586674049619	-0.1569341758940137
Ba9Nb2CN10O	0.2882430554761841	0.41790146374999926	0.5 Ba9Nb2CN10O + 7 Li -> Li7NbN4 + 0.5 BaO + 0.5 BaCN2 + 3.5 Ba	0.5 Ba9Nb2CN10O -> Ba2NbN3 + 0.5 BaO + 0.5 BaN2 + 0.5 BaCN2 + Ba	-0.48669597303352674	-0.7423852733492193	-0.7509805336133617
BaAg(PO3)3	3.638597571666648	4.839123123333293	3 BaAg(PO3)3 + 3 Li -> Ba2Li3(PO3)7 + Ba(PO3)2 + 3 Ag	3.5 BaAg(PO3)3 -> Ag3(PO4)2 + 0.5 AgPO3 + 2 BaP4O11 + 1.5 Ba	-0.11087932968074243	-0.1376214880312292	-0.13912852658929875
BaAg2GeS4	1.8151482654166662	2.705076032500004	2 BaAg2GeS4 + 4 Li -> Ba2GeS4 + Li4GeS4 + 4 Ag	BaAg2GeS4 -> Ag2GeS3 + 0.3333 BaS3 + 0.6667 Ba	-9.382887147246763e-15	-0.1451523626041511	-0.6705945218247269
BaAgSF	1.9780209166666634	2.3499440537500083	BaAgSF + Li -> BaS + LiF + Ag	6 BaAgSF -> BaS3 + 3 Ag2S + 3 BaF2 + 2 Ba	-0.039147978125013694	-0.16942781263888973	-0.595708696893948
BaAgSeF	1.834400906666664	2.4522321016666657	BaAgSeF + Li -> BaSe + LiF + Ag	2.25 BaAgSeF -> Ag2Se + 0.25 AgSe5 + 1.125 BaF2 + 1.125 Ba	-0.020274425803570306	-0.14529334872683752	-0.33221609053030066
BaAgTeF	1.5927264366666642	2.120506651249991	BaAgTeF + Li -> BaTe + LiF + Ag	BaAgTeF -> AgTe + 0.5 BaF2 + 0.5 Ba	-0.04021379104166711	-0.16007445347944127	-0.3860501753902188
BaAl2(GeO4)2	1.9117640192708647	3.967152336249987	0.6 BaAl2(GeO4)2 + 1.6 Li -> LiAlO2 + 0.6 BaGeO3 + 0.2 Li3AlGeO5 + 0.4 Ge	BaAl2(GeO4)2 -> Al2Ge2O7 + 0.5 O2 + Ba	-0.18732369576090058	-0.24735443763514198	-0.01619789271982297
BaAl2(SiO4)2	0.9684058805208466	4.028368836249987	3 BaAl2(SiO4)2 + 8 Li -> Li3AlSiO5 + 3 BaSiO3 + 5 LiAlO2 + 2 Si	BaAl2(SiO4)2 -> Al2SiO5 + SiO2 + 0.5 O2 + Ba	-0.027202087272706343	-0.24395533371621925	-0.012662338221167246
BaAl2B2O7	1.271058549404699	3.574305250416684	5.027 BaAl2B2O7 + 2.283 Li -> Ba2Li(BO2)5 + 0.3641 Ba8Al10B12O41 + 1.283 LiAl5O8 + 0.1141 BaB6	2.5 BaAl2B2O7 -> Al5BO9 + BaB4O7 + 0.75 O2 + 1.5 Ba	-0.04499420551339117	-0.26687891038690115	-0.02851135723900544
BaAl2O4	0.2884949083333311	3.4245658342999716	BaAl2O4 + 5 Li -> Li5AlO4 + 0.2 Ba4Al5 + 0.2 Ba	32 BaAl2O4 -> Ba7Al64O103 + 12.5 O2 + 25 Ba	-0.10000356918966169	-0.3461827183152155	-0.058108632704377605
BaAl2Si3(NO)4	1.030806591458307	1.8025374106249847	BaAl2Si3(NO)4 + 1.333 Li -> BaAl2O4 + 1.333 LiSi2N3 + 0.3333 Si	18 BaAl2Si3(NO)4 -> BaN6 + 12 Si3N4 + 9 BaAl2(SiO4)2 + 18 AlN + 8 Ba	-0.052809621572942334	-0.4280604555952303	-0.5819420128015684
BaAl4S7	1.5763906636110945	2.4569132169444456	0.6667 BaAl4S7 + Li -> LiAlS2 + 0.6667 Ba(AlS2)2 + 0.3333 Al	BaAl4S7 -> BaS3 + 1.333 Al2S3 + 1.333 Al	-0.03959186727940711	-0.3715049486250017	-0.9058049859469648
BaAlB4H3O10	1.7977478979165467	3.6752806362499943	3.75 BaAlB4H3O10 + 3 Li -> Li3B5(HO5)2 + 0.625 Ba3Al2B10H4O23 + 0.625 Ba3B6H2O13 + 2.5 AlHO2 + 1.5 H2	2 BaAlB4H3O10 -> BaB8H4O15 + 2 AlHO2 + 0.5 O2 + Ba	-0.03625638116647867	-0.20497479572463861	-0.01618092624996592
BaAlBO3F2	1.8672305426040054	3.857876069144258	11.55 BaAlBO3F2 + Li -> BaLi(B3O5)3 + 2.177 Al5BO9 + 0.3333 Ba3Al2F12 + 0.0625 B6O + 9.552 BaF2	10.15 BaAlBO3F2 -> BaB4O7 + 1.231 Al6B5(O5F)3 + 1.385 Ba3Al2F12 + 2.5 O2 + 5 Ba	-0.04651771446433273	-0.2175702974999978	-0.026910687778811226
BaAlF5	1.2024449283333276	6.240412441249994	6 BaAlF5 + 3 Li -> Ba3Al2F12 + 3 BaLiAlF6 + Al	BaAlF5 -> F2 + AlF3 + Ba	-0.041797425833333346	-0.09485211197368093	-0.052917448645050325
BaAlH5	0.6526549475000063	1.2336491862499983	2 BaAlH5 + 3 Li -> Ba2AlH7 + 3 LiH + Al	BaAlH5 -> H2 + AlH3 + Ba	-0.1835567780552365	-0.44755517478230056	-0.9972080464915825
BaAlSi5N7O2	0.9914232520833445	1.7074452696875044	2 BaAlSi5N7O2 + 2 Li -> BaAl2O4 + Ba(Si3N4)2 + 2 LiSi2N3	18 BaAlSi5N7O2 -> BaN6 + 9 BaAl2Si3(NO)4 + 21 Si3N4 + 8 Ba	-0.05429783674715871	-0.4395347706896602	-0.6917033860297175
BaAlSiH	0.24186204333332834	0.8892057646874988	BaAlSiH + Li -> LiH + BaAlSi	5 BaAlSiH -> BaAlH5 + 5 Si + 4 Al + 4 Ba	-0.37952721184027616	-0.681809323303564	-1.464588739890102
BaAs2F12	4.47034186520828	6.4226004737500615	0.75 BaAs2F12 + Li -> LiAsF6 + 0.75 BaF2 + 0.5 AsF3	0.5 BaAs2F12 -> AsF5 + 0.5 F2 + 0.5 Ba	-0.2954012484895818	-0.04661791046295605	-0.22492995635322277
BaAsHO4	2.581482468229261	3.9948528431249977	26 BaAsHO4 + 12 Li -> Ba2As6O11 + 4 Li3AsO4 + 8 Ba3(AsO4)2 + 13 H2O	2 BaAsHO4 -> Ba(AsO3)2 + 0.5 O2 + H2O + Ba	-0.2572978462474729	-0.17370692583928782	-0.02689938825317828
BaAu2(SO4)4	4.105398486250021	3.3314909919097353	0.3333 BaAu2(SO4)4 + 2 Li -> Li2SO4 + 0.3333 BaSO4 + 0.6667 Au	BaAu2(SO4)4 -> Au2O3 + 4.5 O2 + BaSO4 + 3 S	-0.38758648589556444	-0.07999402936974809	-0.11212781098404445
BaB2F8	1.9159148586111119	6.865563723750003	0.1667 BaB2F8 + Li -> LiF + 0.1667 BaF2 + 0.3333 B	0.5 BaB2F8 -> BF3 + 0.5 F2 + 0.5 Ba	-0.03706543010472663	-0.02378725608695076	-0.14126759921430398
BaB2S3O13	3.5481598437846906	3.2773654103819405	1.083 BaB2S3O13 + Li -> LiB(SO4)2 + 1.083 BaSO4 + 0.5833 B2O3 + 0.1667 S	BaB2S3O13 -> BaSO4 + B2O3 + 3 O2 + 2 S	-0.24265308828334842	-0.1330445874999895	-0.14300888574257264
BaB4O7	1.5157842306965406	3.8607627750000417	2.488 BaB4O7 + 1.488 Li -> Ba2Li(BO2)5 + 0.4884 BaLi(B3O5)3 + 0.09302 B6O	2 BaB4O7 -> BaB8O13 + 0.5 O2 + Ba	-0.0392515319577722	-0.20896148614999377	-0.021560610488235987
BaB8O13	2.3797680757159334	4.382493722916718	3.909 BaB8O13 + 2.909 Li -> BaB4O7 + 2.909 BaLi(B3O5)3 + 0.1818 B6O	2 BaB8O13 -> O2 + 8 B2O3 + 2 Ba	-0.024125186438805457	-0.19579540710000343	-0.037539572618005224
BaBAsF10	3.5155939533333367	7.0635317268749755	2 BaBAsF10 + 4 Li -> BaB2F8 + 4 LiF + BaF2 + 2 AsF3	BaBAsF10 -> AsF5 + BF3 + F2 + Ba	-0.18718390996307788	-0.005775970849992262	-0.16285458135853137
BaBAsO5	2.9423472983333614	4.054553033472252	2.25 BaBAsO5 + 0.4 Li -> Ba2As2O7 + 0.25 BaLi(B3O5)3 + 0.05 Li3AsO4 + 0.1 As2O3	8 BaBAsO5 -> BaB8O13 + 4 Ba(AsO3)2 + 1.5 O2 + 3 Ba	-0.2445107154586994	-0.20905850651310254	-0.04387808399357418
BaBClF4	1.927103901944513	4.317729154999993	0.3333 BaBClF4 + Li -> LiF + 0.3333 BaClF + 0.3333 B	2 BaBClF4 -> BaB2F8 + Cl2 + Ba	-0.028840419931013273	-0.0692027860833293	-0.16299321153505408
BaBPF10	2.6771436436666987	6.8081879374999925	0.2 BaBPF10 + Li -> LiF + 0.1 BaB2F8 + 0.1 BaF2 + 0.2 P	2 BaBPF10 -> BaB2F8 + F2 + 2 PF5 + Ba	-0.10041822072369166	-0.02400444284998926	-0.2002199677322083
BaBPO5	2.0057922616667057	4.150122830833334	2.25 BaBPO5 + 0.625 Li -> Ba2P2O7 + 0.25 BaLi(B3O5)3 + 0.125 Li3PO4 + 0.125 P	BaBPO5 -> BPO4 + 0.5 O2 + Ba	-0.04303525171855327	-0.17760468756579284	-0.04225051311538319
BaBe2(BO3)2	0.9698169681333013	3.7538378793750984	1.096 BaBe2(BO3)2 + 1.923 Li -> BaLiBO3 + 0.1538 Li6B4O9 + 0.09615 BaB6 + 2.192 BeO	2 BaBe2(BO3)2 -> BaB4O7 + 0.5 O2 + 4 BeO + Ba	-0.035310671314712216	-0.2411099576811626	-0.0334457292472079
BaBe2(PO4)2	1.7404131003333838	4.378780969375019	3 BaBe2(PO4)2 + 7.5 Li -> Ba3(PO4)2 + 2.5 Li3PO4 + 6 BeO + 1.5 P	BaBe2(PO4)2 -> Ba(PO3)2 + O2 + 2 Be	-1.7187022974049733e-15	-0.14541340546447912	-0.03803221337836282
BaBe2Si2O7	1.124842518333319	3.7965090208333505	BaBe2Si2O7 + 1.333 Li -> BaBeSiO4 + 0.6667 Li2BeSiO4 + 0.3333 BeO + 0.3333 Si	BaBe2Si2O7 -> Be2SiO4 + SiO2 + 0.5 O2 + Ba	-0.0320179776923144	-0.2357134173674238	-0.029968627631537625
BaBeF4	0.7856854183333419	6.284181349166662	0.5 BaBeF4 + Li -> LiF + 0.5 BaF2 + 0.5 Be	BaBeF4 -> F2 + BeF2 + Ba	-0.03850767860295212	-0.09542681115741747	-0.04450404027779342
BaBePO4F	1.785257737222191	4.030395019999954	9 BaBePO4F + 11.25 Li -> Ba5P3O12F + 3.75 Li3PO4 + 4 BaF2 + 9 BeO + 2.25 P	4 BaBePO4F -> BaBeF4 + 0.5 Ba2P2O7 + 1.5 BaBe2(PO4)2 + 0.25 O2 + 0.5 Ba	-0.030182669117657213	-0.14514772679686527	-0.038075474902744766
BaBeSiO4	0.8267514652083403	3.4078516599999946	3 BaBeSiO4 + 2 Li -> Li2BeSiO4 + 1.5 Ba2SiO4 + 2 BeO + 0.5 Si	2 BaBeSiO4 -> BaBe2Si2O7 + 0.5 O2 + Ba	-0.07651770499999078	-0.28448564316666225	-0.04272190599052239
BaBi2(B2O5)2	2.341974486666687	3.6357279031251277	2.2 BaBi2(B2O5)2 + 1.2 Li -> Bi4B2O9 + Ba2Li(BO2)5 + 0.2 BaLi(B3O5)3 + 0.4 Bi	BaBi2(B2O5)2 -> BiBO3 + 0.75 BaB4O7 + 0.25 Bi4O7 + 0.25 Ba	-0.19404672032432124	-0.23213296644735193	-0.030293119388590917
BaBi2(MoO4)4	3.281995402916694	4.100166560625004	BaBi2(MoO4)4 + Li -> Bi2Mo2O9 + 0.5 Li2MoO4 + BaMoO4 + 0.5 MoO2	BaBi2(MoO4)4 -> Bi2(MoO4)3 + MoO3 + 0.5 O2 + Ba	-0.47729988526595557	-0.1824203402171063	-0.06210139507091439
BaBi6(PO5)4	2.472257798333331	3.8532985249999494	0.75 BaBi6(PO5)4 + 3 Li -> Bi3PO7 + 0.25 Ba3Bi2(PO4)4 + Li3PO4 + Bi	0.5 BaBi6(PO5)4 -> BiO2 + 2 BiPO4 + 0.5 Ba	-0.1934324182397935	-0.1899407378560225	-0.06401104061032825
BaBiBO4	2.211684725833317	3.055291045000063	BaBiBO4 + Li -> BaLiBO3 + 0.3333 Bi2O3 + 0.3333 Bi	5 BaBiBO4 -> Bi4O7 + 2.5 Ba(BO2)2 + BaBiO3 + 1.5 Ba	-0.2739823201236735	-0.3189664285171556	-0.06198307037451212
BaBiBrO2	1.5259337524999972	3.3969029016666856	2 BaBiBrO2 + 6 Li -> Ba2Br2O + 3 Li2O + 2 Bi	7 BaBiBrO2 -> Bi4Br2O5 + Ba(BrO3)2 + 3 BiBrO + 6 Ba	-0.29185203117283276	-0.32095502967455625	-0.06579318941632684
BaBiClO2	1.640211910833345	3.307887602500001	3 BaBiClO2 + 3 Li -> Ba3Bi(ClO)3 + Li3BiO3 + Bi	4 BaBiClO2 -> Bi4O7 + 1.875 BaCl2 + 0.125 Ba(ClO4)2 + 2 Ba	-0.310319222145063	-0.31291836668639306	-0.07117026534237292
BaBiIO2	1.5162008808333418	2.9731474360416685	2 BaBiIO2 + 6 Li -> Ba2I2O + 3 Li2O + 2 Bi	2.333 BaBiIO2 -> BiIO + 0.3333 Ba(IO3)2 + 0.3333 Bi4I2O5 + 2 Ba	-0.2823315439506411	-0.33378520829060543	-0.19971930427084517
BaBiNO5	2.3195002816666457	2.811057779999949	1.5 BaBiNO5 + 1.5 Li -> BaBiO3 + 0.5 Li3BiO3 + 0.5 Ba(NO3)2 + 0.25 N2	3 BaBiNO5 -> BaBiO3 + 1.5 Ba(NO3)2 + Bi2O3 + 0.5 Ba	-0.5304597424210957	-0.26668801720702984	-0.07571590308350418
BaBiSe3	1.7817686495833396	2.2638928062499963	2 BaBiSe3 + 2 Li -> Bi2Se3 + Li2Se + 2 BaSe	2 BaBiSe3 -> Bi2Se3 + BaSe3 + Ba	-0.005087725973557777	-0.1603588833271108	-0.45075530472972725
BaBr2	0.0009245316666668391	4.005091102499997	4 Li + Ba -> BaLi4	0.5 BaBr2 -> Br + 0.5 Ba	-0.007085174899998492	-0.1156949465131446	-0.05533576747220359
BaBrF	6.661338147750939e-16	4.159324302499984	Li -> Li	2 BaBrF -> BaF2 + 2 Br + Ba	-0.028342243161762593	-0.11885771161762215	-0.04543557906250739
BaC2(NO)2	1.6737472795832993	2.588960159166677	1.5 BaC2(NO)2 + 2 Li -> Li2CN2 + BaCO3 + 0.5 BaCN2 + 0.5 C	BaC2(NO)2 -> CO2 + N2 + C + Ba	-0.06643916876983935	-0.20734572151514818	-0.41182367653071417
BaCN2	0.16048112333331233	1.7892413999999899	BaCN2 + 2 Li + Ba2N -> Ba3N + Li2CN2	BaCN2 -> N2 + C + Ba	-0.08538776859375119	-0.4395518890865553	-0.5842307971599987
BaCO3	1.1496936620833456	4.0293651800000045	0.5 BaCO3 + 2 Li -> Li2O + 0.5 BaO + 0.5 C	BaCO3 -> CO2 + 0.5 O2 + Ba	-0.15568813187500607	-0.17701740445652137	-1.2264635450787152e-14
BaCa(GaO2)4	1.5605308594443408	3.3793175074999597	3 BaCa(GaO2)4 + 3 Li -> Ba3Ga4O9 + Ca3Ga4O9 + 3 LiGaO2 + Ga	BaCa(GaO2)4 -> CaGa4O7 + 0.5 O2 + Ba	-0.27810826774076913	-0.2662363076086942	-0.05146608464973168
BaCa(PO3)4	2.4732748579167043	4.614039224999992	2 BaCa(PO3)4 + 3.333 Li -> Ca2P2O7 + 3.333 LiPO3 + Ba2P2O7 + 0.6667 P	BaCa(PO3)4 -> CaP4O11 + 0.5 O2 + Ba	-0.04882081430577756	-0.1382344871698129	-0.10803183420543494
BaCa2(PN2)6	1.1667270577884281	2.416923787499999	BaCa2(PN2)6 + 3.25 Li -> Ca2PN3 + 3.25 LiPN2 + 0.625 Ba(PN2)2 + 0.125 Ba3P4	BaCa2(PN2)6 -> Ba(PN2)2 + 1.333 P3N5 + 0.6667 N2 + 2 Ca	-0.04774998087811877	-0.3286472184047635	-0.7497424981403005
BaCa2WN4	0.10569564472225212	1.5146140242013884	1.333 BaCa2WN4 + 6 Li -> Li6WN4 + 1.333 Ca2N + 1.333 Ba + 0.3333 W	1.286 BaCa2WN4 -> BaWN3 + 0.2857 BaN6 + 0.1429 W2N3 + 2.571 Ca	-0.3215755316617104	-0.645425893023333	-0.6798244240439262
BaCaAlF7	1.1283723333333828	6.211220149999994	2 BaCaAlF7 + Li -> BaLiAlF6 + 0.3333 Ba3Al2F12 + 2 CaF2 + 0.3333 Al	BaCaAlF7 -> CaAlF5 + F2 + Ba	-0.03954562576086307	-0.09451358298076684	-0.04619485426369341
BaCaB2O5	1.0109488402083584	3.4006191262499903	1.05 BaCaB2O5 + Li -> BaLiBO3 + 0.25 Ca3(BO3)2 + 0.15 Ca2B2O5 + 0.05 BaB6	5 BaCaB2O5 -> Ba2Ca(BO2)6 + 2 Ca2B2O5 + 1.5 O2 + 3 Ba	-0.10321435823245029	-0.28476996999268556	-0.051951576510612885
BaCaCrF7	2.3806036408332325	5.03475298333334	2 BaCaCrF7 + Li -> BaLiCrF6 + CaCrF4 + BaF2 + CaF2	1.333 BaCaCrF7 -> BaCrF6 + 0.3333 BaF2 + 1.333 CaF2 + 0.3333 Cr	-0.09460079017735845	-0.09370617269229253	-1.7613359496874965
BaCaGaF7	2.2946043180555358	6.213487031250004	2 BaCaGaF7 + 3 Li -> Li3GaF6 + 2 BaF2 + 2 CaF2 + Ga	BaCaGaF7 -> BaGaF5 + F2 + Ca	-0.10385682017857167	-0.09079368894230644	-0.08103420185606502
BaCaP2(HO4)2	2.177628910650933	4.071329043750116	5.545 BaCaP2(HO4)2 + 4.364 Li -> Ca5P3HO13 + 2.773 Ba2P2O7 + 0.5455 CaP2(HO)4 + 1.455 Li3PO4 + 3.955 H2O	3 BaCaP2(HO4)2 -> Ba2CaP4(H3O8)2 + Ca2P2O7 + 0.5 O2 + Ba	-0.04141575777912365	-0.14665316269999606	-0.04073319430145883
BaCd(PO3)4	2.6416669055625057	4.757174241666711	14 BaCd(PO3)4 + 24 Li -> Ba2Li3(PO3)7 + 12 BaCdP2O7 + 2 CdP2 + 21 LiPO3	4 BaCd(PO3)4 -> BaP4O11 + 2 Cd2P6O17 + 1.5 O2 + 3 Ba	-0.09364476493111074	-0.13373437637254781	-0.1168586433527583
BaCdAs2O7	2.731763822847199	3.899432859999984	3 BaCdAs2O7 + 2.769 Li -> Cd3(AsO4)2 + 0.2308 Ba2As6O11 + 0.9231 Li3AsO4 + 0.8462 Ba3(AsO4)2	BaCdAs2O7 -> Cd(AsO3)2 + 0.5 O2 + Ba	-0.3482341192708396	-0.17138408731132815	-0.04347429239248646
BaCdAsF	0.8599281066666613	1.555768488906249	2.182 BaCdAsF + 2.182 Li -> Ba2CdAs2 + 0.09091 Ba(CdAs)2 + 0.09091 BaCd11 + 2.182 LiF	4 BaCdAsF -> CdAs2 + Cd3As2 + 2 BaF2 + 2 Ba	-0.1204660324609379	-0.21535938387583187	-0.6024973125396751
BaCdGaF7	2.641560628472233	6.057312168749994	1.5 BaCdGaF7 + 3 Li -> Li3GaF6 + 0.5 BaGaF5 + BaF2 + 1.5 Cd	BaCdGaF7 -> BaGaF5 + F2 + Cd	-0.1609854776428552	-0.07644796420454014	-0.08787434736110078
BaCdGeS4	1.7761725864583278	2.6032917437500167	2 BaCdGeS4 + 1.333 Li -> Ba2GeS4 + 0.6667 Li2CdGeS4 + 1.333 CdS + 0.3333 Ge	2 BaCdGeS4 -> BaGe2S5 + 2 CdS + 0.3333 BaS3 + 0.6667 Ba	-0.027157487466215713	-0.15319141339673759	-0.6895247169378314
BaCdO2	1.624090189583332	2.7331887125000027	BaCdO2 + 2 Li -> Li2O + BaO + Cd	2 BaCdO2 -> BaO2 + 2 CdO + Ba	-0.516162217968748	-0.46793601375000327	-0.18727496699274182
BaCdP2O7	2.402831278333392	4.349139140000048	2 BaCdP2O7 + 4 Li -> Li4P2O7 + Ba2P2O7 + 2 Cd	3 BaCdP2O7 -> BaCd(PO3)4 + Cd2P2O7 + O2 + 2 Ba	-0.10152316551535767	-0.1402755633846171	-0.04934996282258419
BaCdSnS4	1.7626856086458407	2.5303414037500063	11 BaCdSnS4 + 8 Li -> Ba8Sn4S15 + 4 Li2CdSnS4 + 3 BaSnS2 + 7 CdS	BaCdSnS4 -> SnS2 + CdS + 0.3333 BaS3 + 0.6667 Ba	-0.026242982972979778	-0.16174124831521852	-0.6903915870375559
BaCeN2	0.38295312083331545	0.5627525875000366	3 BaCeN2 + 4 Li -> Ba3N + 2 Li2CeN2 + CeN	2 BaCeN2 -> BaN2 + 2 CeN + Ba	-0.4479988531761343	-0.7621823680385797	-0.9518086688360858
BaCeO3	0.24954364604166357	3.04636823499999	2 BaCeO3 + 6 Li -> Ce2O3 + 3 Li2O + 2 Ba	2 BaCeO3 -> BaO2 + 2 CeO2 + Ba	-0.23829344722222778	-0.3779267374999966	-0.13662389905230965
BaCl2	0.0009245316666668391	4.24135542	4 Li + Ba -> BaLi4	BaCl2 -> Cl2 + Ba	-0.012093569600003962	-0.1164163127631539	-0.049377725111114934
BaClF	8.881784197001252e-16	4.3512962849999965	Li -> Li	2 BaClF -> BaF2 + Cl2 + Ba	-0.03615636676470313	-0.12190702249999419	-0.04172430208331546
BaCo2(AsO4)2	2.6165370103570993	4.017412230000005	0.625 BaCo2(AsO4)2 + 1.75 Li -> CoO + 0.25 CoAs + 0.5833 Li3AsO4 + 0.2083 Ba3(AsO4)2	BaCo2(AsO4)2 -> CoO2 + Co(AsO3)2 + Ba	-0.35253461467012936	-0.17632475524590863	-0.09621658403331956
BaCo2(PO4)2	2.56549081000001	4.205585397500033	3 BaCo2(PO4)2 + 12 Li -> Ba3(PO4)2 + 4 Li3PO4 + 6 Co	2 BaCo2(PO4)2 -> CoO2 + 2 BaCoP2O7 + Co	-0.14391073601132298	-0.14677697575202653	-0.09538765663331539
BaCo2Si2O7	2.4797590117707853	3.204275713124985	2.5 BaCo2Si2O7 + 4 Li -> Ba2CoSi2O7 + 2 Li2CoSiO4 + 0.5 BaSi2O5 + 2 Co	3 BaCo2Si2O7 -> BaSi2O5 + 2 Co3O4 + 4 SiO2 + 2 Ba	-0.22344924346988915	-0.24299128148437887	-0.08284995531252726
BaCoP2O7	2.683881889166692	4.341488283749974	18 BaCoP2O7 + 18 Li -> Li4P2O7 + 14 LiCoPO4 + 2 Co2P + 9 Ba2P2O7	BaCoP2O7 -> Ba(PO3)2 + 0.5 O2 + Co	-0.11214691787707487	-0.1408033566922846	-0.09428796223041935
BaCr(Si2O5)2	1.6663057283332936	2.0664169212500125	BaCr(Si2O5)2 + 2 Li -> BaSi2O5 + Li2Si2O5 + Cr	2 BaCr(Si2O5)2 -> BaSi2O5 + Cr2O3 + 6 SiO2 + Ba	-1.583452857477205	-0.2164879070564294	-1.3951711216337728
BaCr2O4	1.2518439816666702	2.507081485416628	0.6667 BaCr2O4 + Li -> LiCrO2 + 0.6667 BaO + 0.3333 Cr	1.25 BaCr2O4 -> Cr2O3 + 0.5 BaCrO4 + 0.75 Ba	-1.5977575582222259	-0.32460532220589	-2.3394407019387735
BaCr2O7	4.1233672538888815	4.083020151374971	4 BaCr2O7 + 3 Li -> LiCr3O8 + 4 BaCrO4 + Li2CrO4	2.5 BaCr2O7 -> Cr5O12 + 2.75 O2 + 2.5 Ba	-1.966272947124251	-0.1752998629044087	-2.319245206875019
BaCrF5	2.3191927608333422	5.026113056666636	2 BaCrF5 + Li -> BaLiCrF6 + BaF2 + CrF2	1.333 BaCrF5 -> BaCrF6 + 0.3333 BaF2 + 0.3333 Cr	-0.10716012549181197	-0.09235404736839081	-2.0129553710713877
BaCrO4	2.440673156666655	4.2162881356249775	3 BaCrO4 + 3 Li -> Ba3Cr2O8 + Li3CrO4	2 BaCrO4 -> BaCr2O7 + 0.5 O2 + Ba	-1.84684181491071	-0.1882894678869067	-2.1434464662493826
BaCrP2O7	2.1527710386904877	2.560042109999818	2 BaCrP2O7 + 3.818 Li -> Ba2P2O7 + 1.273 Li3PO4 + 0.7273 CrP + 0.6364 Cr2O3	2 BaCrP2O7 -> BaCr2(P2O7)2 + Ba	-2.39945117908914	-0.14211678149621387	-1.916645406248385
BaCu2GeS4	1.664451008749995	2.412716111458321	2 BaCu2GeS4 + 4 Li -> Ba2GeS4 + Li4GeS4 + 4 Cu	2 BaCu2GeS4 -> BaGeS3 + Cu2GeS3 + 2 CuS + Ba	-0.003576476026776021	-0.157211950034728	-0.6601315992959953
BaCuSeF	1.944223188333332	2.08430271000004	BaCuSeF + Li -> BaSe + LiF + Cu	3 BaCuSeF -> Cu3Se2 + BaSe + 1.5 BaF2 + 0.5 Ba	-0.045234632621950155	-0.15975923262296376	-0.34597077909090745
BaDy2Si3O10	1.0513415464584288	3.748896306249967	1.5 BaDy2Si3O10 + 2 Li -> Li2SiO3 + 1.5 Dy2SiO5 + 1.5 BaSiO3 + 0.5 Si	BaDy2Si3O10 -> Dy2SiO5 + 2 SiO2 + 0.5 O2 + Ba	-0.05068901673294057	-0.26311191633333086	-0.04166915759088763
BaDyCuTe3	1.3116187620833415	1.984691950000001	2 BaDyCuTe3 + 2 Li -> Ba(DyTe2)2 + BaTe + Li2Te + 2 Cu	BaDyCuTe3 -> BaTe2 + CuTe + Dy	-0.07819823537037651	-0.32542715209791684	-0.6579968549865702
BaEr2F8	0.30974945833333445	6.246774937499981	0.1667 BaEr2F8 + Li -> LiF + 0.1667 BaF2 + 0.3333 Er	BaEr2F8 -> F2 + 2 ErF3 + Ba	-0.01653254306123486	-0.07774347532607928	-0.027728983000008256
BaEr2Si3O10	1.0242745095834043	3.653825840000039	1.5 BaEr2Si3O10 + 2 Li -> Li2SiO3 + 1.5 Er2SiO5 + 1.5 BaSiO3 + 0.5 Si	2 BaEr2Si3O10 -> BaEr4Si5O17 + SiO2 + 0.5 O2 + Ba	-0.04659093474433007	-0.26680025625000026	-0.039815845136370154
BaEr4Si5O17	1.1278608420832628	3.6676114600000798	BaEr4Si5O17 + 1.333 Li -> BaEr2Si3O10 + 0.6667 Li2SiO3 + Er2SiO5 + 0.3333 Si	0.5 BaEr4Si5O17 -> Er2Si2O7 + 0.5 SiO2 + 0.25 O2 + 0.5 Ba	-0.03907285348471312	-0.26277529337301786	-0.0407187593750149
BaErAgSe3	1.6881308666666488	2.346445342500007	BaErAgSe3 + Li -> LiErSe2 + BaSe + Ag	2 BaErAgSe3 -> BaSe2 + BaSe3 + Ag2Se + 2 Er	-0.016494136642488666	-0.23727694104160135	-0.5440866354922023
BaErCuS3	1.3392683683333244	2.504749419583335	BaErCuS3 + Li -> BaS + LiErS2 + Cu	2 BaErCuS3 -> CuS2 + Er2S3 + CuS + 2 Ba	-1.3037195169725756e-15	-0.2943621044140623	-0.725661798378703
BaErCuSe3	1.4390560533333328	2.3755296088888933	BaErCuSe3 + Li -> BaSe + LiErSe2 + Cu	BaErCuSe3 -> BaSe2 + CuSe + Er	-0.009123526607140331	-0.23071033270664043	-0.5314648743005828
BaF2	0.08592511333333885	6.092021699999992	0.5 BaF2 + Li -> LiF + 0.5 Ba	1.5 BaF2 -> BaF3 + 0.5 Ba	-0.07555838959999983	-0.14347733016666253	-0.0030272841162723996
BaFe(Si2O5)2	2.195199832083339	2.664718348749979	2 BaFe(Si2O5)2 + 2 Li -> Li2FeSiO4 + 2 BaSi2O5 + 3 SiO2 + Fe	2 BaFe(Si2O5)2 -> BaSi2O5 + Fe2O3 + 6 SiO2 + Ba	-0.07938166441406747	-0.21936295984847454	-0.07346425162500747
BaFe2(P2O7)2	3.1478190402084394	4.58005010833339	BaFe2(P2O7)2 + 2 Li -> Li2FeP2O7 + 0.5 Fe2P2O7 + 0.5 Ba2P2O7	BaFe2(P2O7)2 -> Fe(PO3)3 + FePO4 + 0.5 O2 + Ba	-0.11806847364404405	-0.13533315388177347	-0.08365813638888486
BaFe2(SeO3)4	3.013932916515058	4.125941822812467	0.7273 BaFe2(SeO3)4 + Li -> LiFe(SeO3)2 + 0.7273 BaSeO3 + 0.1818 Fe2O3 + 0.09091 FeSe2	2.25 BaFe2(SeO3)4 -> Fe2(Se2O5)3 + 0.25 Fe2(SeO4)3 + 2.25 BaSeO4 + 2 Fe	-0.4636338689989392	-0.16168071669154194	-0.13478170127906974
BaFe2P2O7F2	3.1747941395833026	3.641043267812499	Li + LiFeP2O7 -> Li2FeP2O7	2 BaFe2P2O7F2 -> Fe3(P2O7)2 + 0.6667 BaFeF5 + 0.3333 FeF2 + 1.333 Ba	-0.08818116587120794	-0.13079791441176525	-0.14709756694602039
BaFe2PbO5	2.171309104672698	2.4281767629686835	2 BaFe2PbO5 + Li -> FeO + LiFeO2 + Ba2Fe2O5 + 2 PbO	2 BaFe2PbO5 -> BaPbO3 + 2 Fe2O3 + PbO + Ba	-0.390789940805925	-0.34205461960527606	-0.10409519523473598
BaFe2Si2O7	2.37279883708333	2.5697807524999114	BaFe2Si2O7 + 2 Li + Fe2O3 -> Li2FeSiO4 + 3 FeO + BaSiO3	2.5 BaFe2Si2O7 -> Ba2Si3O8 + 2 Fe2SiO4 + 0.5 Fe2O3 + 0.5 Ba	-0.14455998327546027	-0.25885186750000155	-0.15361389920002644
BaFe3(PO4)3	2.9240725783333867	3.4753800524999807	BaFe3(PO4)3 + Li -> LiFePO4 + BaFe2(PO4)2	0.3333 BaFe3(PO4)3 -> FePO4 + 0.3333 Ba	-0.13574275293924565	-0.14545903412111794	-0.1213405960112075
BaFeF5	3.1791637758333806	6.354275362083342	BaFeF5 + Li -> LiF + BaF2 + FeF2	1.5 BaFeF5 -> FeF6 + 0.5 FeF3 + 1.5 Ba	-0.15406363901639475	-0.09135960057017511	-0.0835913283333225
BaFeP(O2F)2	3.3320015583333475	4.310897013125004	2 Li + 3 BaFe2(P2O7)2 + 2 LiF -> Ba2P2O7 + BaFe2P2O7F2 + 4 LiFeP2O7	5 BaFeP(O2F)2 -> BaFe2(P2O7)2 + FePO4 + 2 BaFeF5 + O2 + 2 Ba	-0.14764239911841504	-0.13588069479630294	-0.06357923920634745
BaGa2(GeO4)2	1.966282531770841	4.014578951250005	BaGa2(GeO4)2 + 2.667 Li -> BaGeO3 + 0.3333 Li3GaGeO5 + 1.667 LiGaO2 + 0.6667 Ge	2 BaGa2(GeO4)2 -> Ga4GeO8 + O2 + 3 GeO2 + 2 Ba	-0.253410340747132	-0.20786465331635595	-0.016982054459462326
BaGa2(SiO4)2	1.7215256958333507	3.8707261787499916	BaGa2(SiO4)2 + 3 Li -> Li3GaSiO5 + BaSiO3 + Ga	BaGa2(SiO4)2 -> Ga2O3 + 2 SiO2 + 0.5 O2 + Ba	-0.17243743500006392	-0.2167890049561303	-0.019657409594592945
BaGa2B2O7	1.873686969166665	3.6581542043749686	5 BaGa2B2O7 + 6 Li -> BaGa4O7 + 2 Ba2Li(BO2)5 + 4 LiGaO2 + 2 Ga	2 BaGa2B2O7 -> BaB4O7 + 2 Ga2O3 + 0.5 O2 + Ba	-0.19502879877144164	-0.22254290597221837	-0.025134009355480824
BaGa2GeS6	2.056773635833361	2.7860839612499078	0.75 BaGa2GeS6 + Li -> LiGaS2 + 0.5 BaGeS3 + 0.25 Ba(GaS2)2 + 0.25 Ge	2 BaGa2GeS6 -> BaGa4S7 + 0.3333 BaS3 + 2 GeS2 + 0.6667 Ba	-0.025960728804359512	-0.130096334831727	-0.7193493152911679
BaGa2SiS6	1.7736800627083344	2.785626643749911	0.5 BaGa2SiS6 + Li -> LiGaS2 + 0.25 Ba2SiS4 + 0.25 Si	2 BaGa2SiS6 -> BaGa4S7 + 0.3333 BaS3 + 2 SiS2 + 0.6667 Ba	-0.025968582173909738	-0.21677752477272216	-0.794511381682127
BaGa4O7	1.8196267116666314	3.548157122500059	BaGa4O7 + 1.5 Li -> Ba(GaO2)2 + 1.5 LiGaO2 + 0.5 Ga	0.5 BaGa4O7 -> Ga2O3 + 0.25 O2 + 0.5 Ba	-0.2764201480048283	-0.23755519193750296	-0.034355202983856525
BaGa4S7	2.0410665733333015	2.799693321249987	BaGa4S7 + Li -> Ba(GaS2)2 + LiGaS2 + GaS	0.5 BaGa4S7 -> Ga2S3 + 0.1667 BaS3 + 0.3333 Ba	-0.03674284139705675	-0.117849458839284	-0.7124639730256721
BaGaB4H3O10	1.828949635539073	3.7789194862499556	1.327 BaGaB4H3O10 + 1.236 Li -> LiGaBH3O5 + 0.3636 Ba3B6H2O13 + 0.2364 BaLi(B3O5)3 + 0.1273 H2 + 0.3273 Ga	BaGaB4H3O10 -> GaHO2 + 0.5 BaB8H4O15 + 0.25 O2 + 0.5 Ba	-0.08732334265818675	-0.19300027979451873	-0.017866609431816727
BaGaBO3F2	2.2727971261110405	4.1309034878289745	9 BaGaBO3F2 + 2 Li -> BaLi(B3O5)3 + 4 Ga2O3 + 0.3333 Li3GaF6 + 8 BaF2 + 0.6667 Ga	8 BaGaBO3F2 -> BaB8O13 + 3.2 BaGaF5 + 2.4 Ga2O3 + 1.9 O2 + 3.8 Ba	-0.1356924504302519	-0.19141246596153438	-0.03972605465777379
BaGaF5	2.318691503055558	6.241533833333325	2 BaGaF5 + 3 Li -> Li3GaF6 + 2 BaF2 + Ga	BaGaF5 -> BaF3 + F2 + Ga	-0.12198688899999421	-0.0899781488157787	-0.09602167346490709
BaGaH5	0.9033320649999954	0.9081592337500131	2 BaGaH5 + 6 Li -> BaLiH3 + Ba(GaH)2 + 5 LiH	0.4 BaGaH5 -> H2 + 0.4 Ga + 0.4 Ba	-0.1753533272416692	-0.2731496863327272	-0.8675883082563014
BaGaSiH	0.7074080200000017	0.6275665149999948	3 BaGaSiH + Li -> BaLiH3 + 1.667 BaGaSi + 0.3333 BaGa4 + 1.333 Si	2 BaGaSiH -> Ba(GaH)2 + 2 Si + Ba	-0.3330118385511378	-0.5241106677205876	-1.2962692297980205
BaGd2O4	0.2356020570833321	2.6411798974999376	0.5 BaGd2O4 + Li -> LiGdO2 + 0.5 Ba	2 BaGd2O4 -> BaO2 + 2 Gd2O3 + Ba	-0.3034209876136531	-0.4346818459999984	-0.14760041467894336
BaGd2PdO5	2.494869853333306	2.3588168649998935	4 BaGd2PdO5 + 2 Li -> Li2PdO2 + 2 Ba2PdO3 + 4 Gd2O3 + Pd	3.5 BaGd2PdO5 -> Gd(PdO2)2 + 1.5 Ba2PdO3 + 3 Gd2O3 + 0.5 Ba	-0.3867575469833362	-0.36512205000002407	-0.13973423098853832
BaGd2Si3O10	1.0386627664583221	3.652686707499989	2 BaGd2Si3O10 + 1.333 Li -> Gd2SiO5 + Ba2Gd2Si4O13 + 0.6667 Li2SiO3 + 0.3333 Si	BaGd2Si3O10 -> Gd2Si2O7 + SiO2 + 0.5 O2 + Ba	-0.08518516774304619	-0.2234261913234934	-0.045432793206417355
BaGdCuS3	1.3650369008333492	2.454754872750002	2 BaGdCuS3 + 2 Li -> Ba(GdS2)2 + BaS + Li2S + 2 Cu	10 BaGdCuS3 -> CuS2 + Gd10S19 + 9 CuS + 10 Ba	-8.278251452849734e-15	-0.19839831505208538	-0.7108666662994918
BaGdCuSe3	1.3764422833333305	2.3735669683333347	BaGdCuSe3 + Li -> BaSe + LiGdSe2 + Cu	BaGdCuSe3 -> GdSe2 + CuSe + Ba	0.0	-0.1475631328859357	-0.5000412407923598
BaGdCuTe3	1.2838550958333528	2.0167154075000115	2 BaGdCuTe3 + 2 Li -> Ba(GdTe2)2 + BaTe + Li2Te + 2 Cu	BaGdCuTe3 -> GdTe2 + CuTe + Ba	-0.06539457419643568	-0.2430755951187491	-0.6397373997110332
BaGe(PO4)2	2.5703462801388834	4.374525482499985	4 BaGe(PO4)2 + 12 Li -> GeO2 + 4 Li3PO4 + 2 Ba2P2O7 + 3 Ge	BaGe(PO4)2 -> GeP2O7 + 0.5 O2 + Ba	-0.11013467563385371	-0.14906946600000914	-0.08792702465273461
BaGe(S2O7)3	3.8250675870834066	3.2401461057986096	0.6 BaGe(S2O7)3 + 2 Li -> Li2S2O7 + 0.6 GeO2 + 0.6 BaSO4 + SO2	BaGe(S2O7)3 -> GeO2 + 7.5 O2 + BaSO4 + 5 S	-0.3258594922331528	-0.1075749208576473	-0.1852582166520973
BaGe2S5	1.8886170330208376	2.6061898106249926	3 BaGe2S5 + 4 Li -> Li4GeS4 + 3 BaGeS3 + 2 GeS	3 BaGe2S5 -> BaS3 + 6 GeS2 + 2 Ba	-0.0027385047499981496	-0.15211696213542014	-0.731891734386849
BaGe4O9	2.0962752906249795	3.993233620833344	BaGe4O9 + 4 Li -> BaGeO3 + 2 Li2GeO3 + Ge	2 BaGe4O9 -> O2 + 8 GeO2 + 2 Ba	-0.26089601227214443	-0.18257350648284376	-0.031076742653504574
BaGe7N10	1.5721847938646079	1.246539808437485	3.5 BaGe7N10 + 10 Li -> BaGe2 + 10 LiGe2N3 + 2.5 BaGeN2	9 BaGe7N10 -> BaN6 + 21 Ge3N4 + 8 Ba	-0.16406115873562754	-0.32091595909370185	-0.6297536415682399
BaGeF6	2.647879282083312	6.710114067500037	0.25 BaGeF6 + Li -> LiF + 0.25 BaF2 + 0.25 Ge	BaGeF6 -> GeF4 + F2 + Ba	-0.1319774858506939	-0.04297383062499005	-0.12370653999999703
BaGeN2	1.3467880683332538	0.8683712967968806	3.333 BaGeN2 + 0.6667 Li -> BaGe2 + 0.6667 LiGe2N3 + 2.333 BaN2	7 BaGeN2 -> BaGe7N10 + 2 BaN2 + 4 Ba	-0.41438425406250357	-0.6341658839062458	-0.774433537079656
BaGeO3	1.737410316770844	3.468783170277781	3 BaGeO3 + 2 Li -> Li2GeO3 + 1.5 Ba2GeO4 + 0.5 Ge	4 BaGeO3 -> BaGe4O9 + 1.5 O2 + 3 Ba	-0.2800217372158813	-0.29236915647059103	-0.05657452816476649
BaGePbO4	1.9808841109895536	2.9024046245833794	2 BaGePbO4 + 2 Li -> Ba2GeO4 + Li2GeO3 + Pb + PbO	14 BaGePbO4 -> Ge3Pb5O11 + 11 BaGeO3 + 3 Pb3O4 + 3 Ba	-0.32073405291667534	-0.30981909152173115	-0.06901875239969835
BaGeS3	1.7382840758333353	2.5732856799999895	2 BaGeS3 + 2 Li -> Ba2GeS4 + 0.5 Li4GeS4 + 0.5 Ge	2 BaGeS3 -> BaGe2S5 + 0.3333 BaS3 + 0.6667 Ba	-0.005665166249993803	-0.17415485252976493	-0.7345252400512232
BaH2	0.33762794708333566	0.8415625937499974	1.5 BaH2 + Li -> BaLiH3 + 0.5 Ba	BaH2 -> H2 + Ba	-0.29303518497734427	-0.5223843422171439	-0.9009005873214213
BaH4O3	1.4564477758333534	3.2432189595833063	BaH4O3 + Li -> Ba(HO)2 + LiHO + 0.5 H2	2.333 BaH4O3 -> BaH8O5 + 0.3333 Ba(H2O3)2 + Ba	-0.12602136368749495	-0.25358813812500314	-0.07822187691918137
BaH5BrO3	1.5228694695833234	3.3548529995833647	BaH5BrO3 + 2 Li -> BaHBrO + 2 LiHO + H2	12 BaH5BrO3 -> Ba(BrO3)2 + 5 BaBr2 + 30 H2O + 6 Ba	-0.06755517998883587	-0.15960087236111553	-0.03845331132812291
BaH5ClO3	1.4790812658333214	3.304487011249992	0.5 BaH5ClO3 + Li -> LiHO + 0.5 BaHClO + 0.5 H2	16 BaH5ClO3 -> Ba(ClO4)2 + 7 BaCl2 + 40 H2O + 8 Ba	-0.07151962822545643	-0.1612218237500005	-0.04130988156970927
BaH6F8	2.6736685216666554	7.129523007500025	0.3333 BaH6F8 + Li -> LiHF2 + 0.3333 BaF2 + 0.5 H2	BaH6F8 -> F2 + 6 HF + Ba	-0.10572427026375908	-1.935101743847735e-14	-0.1566206878804448
BaHBr	6.661338147750939e-16	1.0503572049999876	Li -> Li	2 BaHBr -> BaBr2 + H2 + Ba	-0.14994117422080722	-0.35474905755200226	-0.6274153024999864
BaHBrO	0.9958605620833394	3.310889858958336	3 BaHBrO + 2 Li -> Ba2Br2O + 2 LiHO + BaHBr	5 BaHBrO -> BaH5BrO3 + 0.3333 Ba(BrO3)2 + 1.667 BaBr2 + 2 Ba	-0.09936209239583738	-0.25415531500000155	-0.0648966186666291
BaHCl	3.3306690738754696e-15	0.9855199799999798	Li -> Li	2 BaHCl -> BaCl2 + H2 + Ba	-0.16403075547080714	-0.35879932355200905	-0.6144838839285485
BaHClO	1.1890129983333262	3.1510533612499945	3.5 BaHClO + Li -> LiHO + Ba(HO)2 + 0.5 Ba4Cl6O + 0.5 BaHCl	5 BaHClO -> BaH5ClO3 + 0.25 Ba(ClO4)2 + 1.75 BaCl2 + 2 Ba	-0.12806973218749818	-0.2736371879166688	-0.09109431997474671
BaHI	6.661338147750939e-16	1.0566125662499941	Li -> Li	2 BaHI -> BaI2 + H2 + Ba	-0.1485846187860247	-0.34665801455199885	-0.6472177519999978
BaHIO	0.9326789745833288	3.0086643281250023	BaHIO + 2 Li -> BaHI + Li2O	12 BaHIO -> Ba(IO3)2 + 5 BaI2 + 6 H2O + 6 Ba	-0.08324873310096326	-0.23091073791667105	-0.2186300333483474
BaHf(PO4)2	1.7926256493333361	4.175750729999968	3 BaHf(PO4)2 + 7.5 Li -> Ba3(PO4)2 + 2.5 Li3PO4 + 3 HfO2 + 1.5 P	BaHf(PO4)2 -> HfP2O7 + 0.5 O2 + Ba	-0.018857654136025914	-0.14684168916666485	-0.042775673541654236
BaHf(SiO3)3	1.0741272786458487	3.8465242024999866	0.75 BaHf(SiO3)3 + 2 Li -> Li2SiO3 + 0.75 BaSiO3 + 0.75 HfO2 + 0.5 Si	BaHf(SiO3)3 -> HfSiO4 + 2 SiO2 + 0.5 O2 + Ba	-0.016746595947269682	-0.21982250640278123	-0.02148445424999812
BaHfF6	1.0309435420833108	6.350979278333364	0.25 BaHfF6 + Li -> LiF + 0.25 BaF2 + 0.25 Hf	BaHfF6 -> F2 + HfF4 + Ba	-0.025100002812500133	-0.07914223395834163	-0.07287752472222353
BaHfN2	0.3153589558333394	0.8624422031250153	BaHfN2 + 2 Li -> Ba + Li2HfN2	3 BaHfN2 -> BaN2 + Hf3N4 + 2 Ba	-0.38871795324998537	-0.6694544927777788	-0.9346862728965468
BaHfO3	0.05694141499999528	3.412572121249939	2.333 BaHfO3 + 6 Li -> Li6Hf2O7 + 2.333 Ba + 0.3333 Hf	2 BaHfO3 -> O2 + 2 HfO2 + 2 Ba	-0.13099064205357802	-0.352402055147059	-0.06757349341501406
BaHfS3	1.0417283708333223	2.3378748062499946	2 BaHfS3 + 2 Li -> Ba2HfS4 + Li2S + HfS	BaHfS3 -> HfS3 + Ba	-0.0017845436290326866	-0.3263347939706125	-0.8270609643277345
BaHg2(ClO)2	2.411332798958326	3.5728781810156414	BaHg2(ClO)2 + 4 Li -> BaCl2 + 2 Li2O + 2 Hg	3.6 BaHg2(ClO)2 -> Hg5(ClO2)2 + 0.4 Ba(ClO4)2 + 2.2 HgCl2 + 3.2 Ba	-0.4593071669318185	-0.22598221299999843	-0.06352005358036172
BaHgAs2O7	3.4533614779166903	3.9799226525000067	2 BaHgAs2O7 + 2 Li -> HgAsO3 + 0.3333 Hg3AsO4 + Ba2As2O7 + 0.6667 Li3AsO4	BaHgAs2O7 -> Hg(AsO3)2 + 0.5 O2 + Ba	-0.39311442165178656	-0.16635326171610454	-0.05632909011904452
BaHgO2	1.99116655583333	3.418397973611118	BaHgO2 + 2 Li -> Li2O + BaO + Hg	10 BaHgO2 -> BaO10 + 10 HgO + 9 Ba	-0.5047466039062614	-0.3747799749999956	-0.13609636710145967
BaHgS2	1.7721138633333309	2.2961985137500016	BaHgS2 + 2 Li -> Li2S + BaS + Hg	4 BaHgS2 -> Ba2HgS5 + 3 HgS + 2 Ba	-0.010708455982143317	-0.22624063062500044	-0.7107375772222126
BaHo2O4	2.660750583333318	2.6032825762500003	2 Li + BaO2 -> Li2O + BaO	2 BaHo2O4 -> BaO2 + 2 Ho2O3 + Ba	-0.2748463998863562	-0.4619945794565212	-0.15067042953552612
BaHo4Si5O17	0.9511443866145761	3.8232939300000686	0.375 BaHo4Si5O17 + 2 Li -> Li2SiO3 + 0.375 BaSiO3 + 0.75 Ho2O3 + 0.5 Si	0.5 BaHo4Si5O17 -> Ho2Si2O7 + 0.5 SiO2 + 0.25 O2 + 0.5 Ba	-0.0411511901933892	-0.26422026123015474	-0.04179758660320898
BaI2	0.000924531666666617	3.210059123749996	4 Li + Ba -> BaLi4	0.5 BaI2 -> I + 0.5 Ba	0.0	-0.12773307703947434	-0.24738510928278734
BaIF	4.440892098500626e-16	3.3302086249999827	Li -> Li	2 BaIF -> BaF2 + 2 I + Ba	-0.03434894727941362	-0.1276119099264712	-0.2225760485101218
BaIn2(P2O7)2	2.4952489386037264	4.471221748333337	0.8108 BaIn2(P2O7)2 + Li -> LiInP2O7 + 0.1892 In3(PO4)2 + 0.05405 InP + 0.4054 Ba2P2O7	BaIn2(P2O7)2 -> InPO4 + In(PO3)3 + 0.5 O2 + Ba	-0.09927809960347878	-0.13561870425213662	-0.0777522780462907
BaInCuF7	3.5992847025000123	6.0555495550000025	3 BaInCuF7 + 6 Li -> LiInF4 + Ba3In2F12 + 5 LiF + 3 Cu	BaInCuF7 -> BaF3 + 0.5 CuF2 + InF3 + 0.5 Cu	-0.22208828752272725	-0.08620478147726862	-0.13382741057500702
BaInF5	2.53617445333328	6.4094796420833084	4 BaInF5 + Li -> LiInF4 + 1.333 Ba3In2F12 + 0.3333 In	BaInF5 -> BaF3 + 0.6667 InF3 + 0.3333 In	-0.14051076166666832	-0.10044500736840933	-0.08480376095394315
BaLa(BiS3)2	1.857568706944483	2.5009083831249765	BaLa(BiS3)2 + Li -> Ba(BiS2)2 + 0.5 La2S3 + 0.5 Li2S	BaLa(BiS3)2 -> LaS2 + 0.3333 BaS3 + Bi2S3 + 0.6667 Ba	-0.004076429456508546	-0.22120319414582745	-0.708493365696997
BaLa2BeO5	0.1865822827083674	2.6903381262499932	BaLa2BeO5 + 2 Li -> Li2O + La2O3 + Ba + BeO	2 BaLa2BeO5 -> BaO2 + 2 La2O3 + 2 BeO + Ba	-0.2716162789423251	-0.4659655500287352	-0.20429715037513763
BaLa2MnS5	1.2575074593678188	2.1279001349999955	BaLa2MnS5 + 2 Li -> La2S3 + Li2S + BaS + Mn	BaLa2MnS5 -> MnS2 + La2S3 + Ba	-0.03141589451862936	-0.3136729763549395	-0.7544386006912613
BaLa2O4	0.23949595645833488	2.584510778749998	BaLa2O4 + 2 Li -> Li2O + La2O3 + Ba	2 BaLa2O4 -> BaO2 + 2 La2O3 + Ba	-0.3306254567045439	-0.5069300110144916	-0.23386397211365084
BaLa2PtO5	1.9920505258333405	2.407926735937502	BaLa2PtO5 + 2 Li -> BaLa2O4 + Li2O + Pt	2 BaLa2PtO5 -> La2Pt2O7 + La2O3 + 2 Ba	-0.3952073368749973	-0.43670405603333107	-0.20054909330056514
BaLa2Sc2O7	0.275377488958334	2.9500048200000157	BaLa2Sc2O7 + 2 Li -> La2O3 + Ba + 2 LiScO2	2 BaLa2Sc2O7 -> BaO2 + 4 LaScO3 + Ba	-0.19762838862920962	-0.4192873510833346	-0.152338592512403
BaLa2Te5O14	2.439037637190962	2.998675893749696	3 BaLa2Te5O14 + 9.889 Li -> Ba3Te4O11 + 3 La2TeO6 + 1.222 LiTe3 + 4.333 Li2TeO3	5 BaLa2Te5O14 -> BaTeO4 + Ba3Te4O11 + 5 La2Te4O11 + Ba	-0.29332745161316254	-0.24264801139518477	-0.18389499520219488
BaLa2WO7	1.6521220433333066	3.350684054999965	3 BaLa2WO7 + 1.2 Li -> La6WO12 + 0.6 Ba5Li2(WO5)3 + 0.2 W	BaLa2WO7 -> La2WO6 + 0.5 BaO2 + 0.5 Ba	-0.2882346125892985	-0.3436896543826906	-0.12649800009082846
BaLa2ZnS5	1.143307055476206	2.1545484096428513	13 BaLa2ZnS5 + 28 Li -> BaZn13 + 13 La2S3 + 14 Li2S + 12 BaS	0.5 BaLa2ZnS5 -> LaS2 + 0.5 ZnS + 0.5 Ba	-0.014625445980084084	-0.3163941517333346	-0.7413428618289348
BaLaAgSe3	1.4105898610416676	2.2842844285000123	2 BaLaAgSe3 + 2 Li -> La2Se3 + Li2Se + 2 BaSe + 2 Ag	6 BaLaAgSe3 -> BaSe3 + 6 LaSe2 + 3 Ag2Se + 5 Ba	0.0	-0.20133945466139336	-0.4823399095675105
BaLaAgTe3	1.1352430060416627	1.9618441284375012	BaLaAgTe3 + Li -> BaTe + 0.5 La2Te3 + 0.5 Li2Te + Ag	2 BaLaAgTe3 -> LaTe3 + Ag2Te + LaTe2 + 2 Ba	-0.03817632064265486	-0.30398051858229147	-0.6117360253983581
BaLaCuS3	1.350515193333326	2.29188053083334	BaLaCuS3 + Li -> BaS + 0.5 La2S3 + 0.5 Li2S + Cu	BaLaCuS3 -> LaS2 + CuS + Ba	-0.0035408240441170413	-0.28537169295572573	-0.7213714720196562
BaLaCuSe3	1.339887220208329	2.234032309583346	BaLaCuSe3 + Li -> BaSe + 0.5 La2Se3 + 0.5 Li2Se + Cu	BaLaCuSe3 -> LaSe2 + CuSe + Ba	-0.0017193494196376946	-0.20678331093580704	-0.48486330764001995
BaLaCuTe3	1.3109786327083306	1.8863991368749884	BaLaCuTe3 + Li -> BaTe + 0.5 La2Te3 + 0.5 Li2Te + Cu	BaLaCuTe3 -> LaTe2 + CuTe + Ba	-0.054454296596779805	-0.31678366569166627	-0.6195603435635397
BaLi(B3O5)3	1.2592093730468785	4.67148411500016	2 BaLi(B3O5)3 + 8.727 Li -> Ba2Li(BO2)5 + 9.727 LiBO2 + 0.5455 B6O	BaLi(B3O5)3 -> BaB8O13 + 0.25 O2 + 0.5 B2O3 + Li	-2.149772421056184e-05	-0.1929451262715427	-0.017606128912033725
BaLi(BS2)3	1.5966667602777926	2.0808064777083173	BaLi(BS2)3 + 3 Li -> Li3BS3 + BaLiBS3 + B	BaLi(BS2)3 -> Ba(BS2)2 + BS2 + Li	-1.268379224882533e-15	-0.2967682034285615	-0.890248651711598
BaLi2MnV2O8	2.2113165374998793	2.831099732083826	BaLi2MnV2O8 + Li -> MnO + 0.3333 Ba3V2O8 + 0.8333 Li3VO4 + 0.5 LiVO2	2.6 BaLi2MnV2O8 -> BaMn2V2O8 + 0.8 Ba2V2O7 + 1.6 Li3VO4 + 0.2 Mn3O4 + 0.4 Li	-0.25765187092038877	-0.21611864194153485	-0.0857667444318233
BaLi2Ti6O14	1.4144614683333714	3.733729589895845	BaLi2Ti6O14 + 1.5 Li -> BaTi2O5 + Li2TiO3 + 1.5 LiTi2O4	4 BaLi2Ti6O14 -> Ba4Ti13O30 + 11 TiO2 + 2 O2 + 8 Li	-0.08562437121914934	-0.2322734927848118	-0.024619245018643987
BaLiAlF6	1.021604444166653	6.121367720833333	0.25 BaLiAlF6 + 0.75 Li -> LiF + 0.25 BaF2 + 0.25 Al	BaLiAlF6 -> BaAlF5 + 0.5 F2 + Li	-0.036936946976744434	-0.09356466749999903	-0.045694490407798716
BaLiAs	0.0036788283333383243	0.7455629944871737	BaLiAs + 2 Li -> Li3As + Ba	5.857 BaLiAs -> Ba3(LiAs)4 + 0.1429 Ba20As13 + 1.857 Li	-0.31695961907530656	-0.5977624176822232	-0.8950340815151507
BaLiBO3	0.25590440949999427	3.600933649333336	0.3333 BaLiBO3 + 1.667 Li -> Li2O + 0.05556 BaB6 + 0.2778 Ba	2 BaLiBO3 -> Ba2B2O5 + 0.125 LiO8 + 1.875 Li	-0.12532619690624713	-0.323917972847223	-0.07939833593749768
BaLiBS3	1.5431077061111007	2.090133270583335	7 BaLiBS3 + 9 Li -> Ba7B4S13 + 8 Li2S + 3 B	20 BaLiBS3 -> Ba7B4S13 + 5 BaS3 + 8 Ba(BS2)2 + 20 Li	-0.0025214595588236577	-0.30004633819444404	-0.8044800515961881
BaLiCrF6	2.1845441308332916	4.940853825833377	0.5 BaLiCrF6 + 0.5 Li -> LiF + 0.5 BaF2 + 0.5 CrF2	BaLiCrF6 -> BaCrF6 + Li	-0.09665665949308666	-0.0927420488043067	-1.972618135580824
BaLiH3	0.0009245316666674497	1.0451905408333302	4 Li + Ba -> BaLi4	2 BaLiH3 -> H2 + 2 BaH2 + 2 Li	-0.23374761005535882	-0.4767687543890906	-0.8477676805681869
BaLiP	0.027939378333337594	0.7614206927083329	BaLiP + 2 Li -> Li3P + Ba	8 BaLiP -> Ba5P4 + Ba3P4 + 8 Li	-0.3423654787015482	-0.6097472752219051	-1.2595845200000022
BaLu2F8	0.32556959999999924	6.363468770000007	0.6667 BaLu2F8 + Li -> LiLuF4 + 0.6667 BaF2 + 0.3333 Lu	BaLu2F8 -> F2 + 2 LuF3 + Ba	-0.04226453214287407	-0.05043500329710282	-0.0346702174285749
BaMg2FeH8	0.3659987713244224	1.0461867849999416	74.5 BaMg2FeH8 + 448 Li -> LiMg149 + 372.5 LiH + 74.5 BaLiH3 + 74.5 Fe	BaMg2FeH8 -> Mg2FeH6 + H2 + Ba	-0.1699536695388888	-0.3646184511641668	-0.8532489112253667
BaMg2H8Os	0.3477789761970138	1.0706379949999372	74.5 BaMg2H8Os + 299 Li -> LiMg149 + 149 LiH + 37.25 Ba2H6Os + 37.25 Li4H6Os	BaMg2H8Os -> Mg2H6Os + H2 + Ba	-0.15007585662571343	-0.3411998099716671	-0.8148473940865459
BaMg2H8Ru	0.3635403467335252	1.107593357499936	74.5 BaMg2H8Ru + 299 Li -> LiMg149 + 49.67 BaLiH3 + 62.08 Li4H6Ru + 12.42 Ba2H6Ru	BaMg2H8Ru -> Mg2H6Ru + H2 + Ba	-0.1560449441257139	-0.3374471103883314	-0.8113833637019061
BaMg2Si2O7	1.2139439208331348	3.5771154137499868	4 BaMg2Si2O7 + 2 Li -> Li2MgSiO4 + 2.5 Mg2SiO4 + 2 Ba2MgSi2O7 + 0.5 Si	2 BaMg2Si2O7 -> BaSi2O5 + 2 Mg2SiO4 + 0.5 O2 + Ba	-0.048915267687509534	-0.2900676549999992	-0.03868875279607131
BaMg2V2O8	2.473190444999897	3.744924969375011	3 BaMg2V2O8 + 3 Li -> Ba3V2O8 + 3 MgVO3 + Li3VO4 + 3 MgO	2 BaMg2V2O8 -> Ba2V2O7 + Mg2V2O7 + O2 + 2 Mg	-0.25026920649998985	-0.22007087733870945	-0.026794958930284718
BaMgCuF7	6.9087705433334	6.431817636250005	Li + LiCu3F10 -> LiCu2F6 + LiCuF4	3 BaMgCuF7 -> Ba2MgCu3F14 + BaF3 + 2 F2 + 2 Mg	-0.36931845770031524	-0.06209647897720627	-0.17242400879463382
BaMgMoF7	2.6340999858333576	3.523225502500016	0.3333 BaMgMoF7 + Li -> LiF + 0.3333 MgF2 + 0.3333 BaF2 + 0.3333 Mo	BaMgMoF7 -> MgMoF6 + 0.5 BaF2 + 0.5 Ba	-0.1791809717187527	-0.09651495977272306	-0.23650230970587538
BaMgP2O7	2.15205825616668	4.2404993012499785	1.6 BaMgP2O7 + Li -> LiMgPO4 + 0.2 Mg3(PO4)2 + 0.8 Ba2P2O7 + 0.2 P	2 BaMgP2O7 -> Mg(PO3)2 + 0.5 O2 + Ba2P2O7 + Mg	-0.04054003134613815	-0.1493897904906467	-0.048055937119577674
BaMgVF7	2.341213838333335	4.369144517499951	4 BaMgVF7 + 3 Li -> Li3VF6 + 4 MgF2 + 4 BaF2 + 3 VF2	BaMgVF7 -> VF4 + MgF2 + 0.5 BaF2 + 0.5 Ba	-0.11186652204285341	-0.0915910143181482	-0.18178959930554317
BaMn2Si2O7	1.6627498243678054	2.78732340458328	BaMn2Si2O7 + 2 Li -> BaSiO3 + Li2MnSiO4 + Mn	8.5 BaMn2Si2O7 -> Mn7SiO12 + 5.5 BaSi2O5 + 5 Mn2SiO4 + 3 Ba	-0.09291687361838186	-0.2647582549218721	-0.14705008320311563
BaMn2V2O8	2.285773696666631	3.225624309062581	2 BaMn2V2O8 + 2 Li -> BaLi2MnV2O8 + 0.3333 Mn5V4O12 + 1.333 MnO + 0.3333 Ba3V2O8	3 BaMn2V2O8 -> Mn2O3 + Ba2V2O7 + 2 Mn2V2O7 + Ba	-0.2950380868691074	-0.20031913969122872	-0.1308045986015376
BaMn5(SO4)6	2.6684631707618838	4.59080136750004	0.4571 BaMn5(SO4)6 + 2 Li -> Li2Mn(SO4)2 + 1.143 MnO + 0.4571 BaSO4 + 0.1429 MnS2	BaMn5(SO4)6 -> Mn2(SO4)3 + 3 MnSO4 + Ba	-0.23019871789463053	-0.10142471549045551	-0.14788814508770454
BaMn9V6(HO13)2	2.455458861666566	3.0808104462498247	0.8333 BaMn9V6(HO13)2 + Li -> LiMnVO4 + 0.8333 BaMn2V2O8 + 1.667 Mn2VHO5 + 0.1667 Mn5V4O12 + 0.6667 MnO	0.3333 BaMn9V6(HO13)2 -> Mn2V2O7 + 0.3333 Mn3O4 + 0.3333 H2O + 0.3333 Ba	-0.27870810849186256	-0.19412985075993694	-0.1534080968604643
BaMnF5	3.828839853333381	5.795828307500014	BaMnF5 + Li -> LiF + BaF2 + MnF2	BaMnF5 -> MnF4 + 0.5 BaF2 + 0.5 Ba	-0.18928891371609957	-0.09535375021930292	-0.1298371220775416
BaMnO3	2.293892528333487	3.405787781428561	6 BaMnO3 + Li -> LiMnO2 + Ba6Mn5O16	8 BaMnO3 -> BaMn8O16 + 4 O2 + 7 Ba	-0.3904590163331729	-0.2906638929629608	-0.0991547792755032
BaMnP(O2F)2	3.882878245833254	4.456058195833299	BaMnP(O2F)2 + 2 Li + 4 MnPO4 -> BaMn3(PO4)3 + 2 LiMnPO4F	5 BaMnP(O2F)2 -> MnPO4 + 2 MnP2O7 + 2 BaMnF5 + O2 + 3 Ba	-0.14702274966866202	-0.13394214725927145	-0.10126842754431564
BaMnP2O7	2.200200720476202	4.152966103749957	1.143 BaMnP2O7 + Li -> LiMnPO4 + 0.5714 Ba2P2O7 + 0.1429 MnP	2 BaMnP2O7 -> Ba(PO3)2 + 2 MnPO4 + Ba	-0.057424983917222505	-0.1420604476153886	-0.11860815700291738
BaMnPClO4F	3.6150240358332812	4.45828206508679	7 BaMnPClO4F + 6 Li -> BaMn3(PO4)3 + 2 Mn2PO4F + 2 Li3PO4 + BaCl2 + 5 BaClF	6 BaMnPClO4F -> Mn(PO3)3 + 3 MnPO4 + 2 MnF3 + 1.5 ClO2 + 2.25 Cl2 + 6 Ba	-0.14189344081992772	-0.12813237704546077	-0.12815567326290855
BaMo2(P2O7)2	2.514564779999972	3.35833172999991	0.6667 BaMo2(P2O7)2 + Li -> LiMoP2O7 + 0.3333 Ba2P2O7 + 0.3333 Mo	0.5 BaMo2(P2O7)2 -> MoP2O7 + 0.5 Ba	-0.15461883373246543	-0.13475604425213739	-0.225387124666665
BaMo2(PO4)4	3.795087600833448	4.106076866249911	BaMo2(PO4)4 + Li -> BaMo(PO4)2 + LiMo(PO4)2	BaMo2(PO4)4 -> Mo2P3O13 + 0.5 Ba(PO3)2 + 0.5 Ba	-0.2442799742771351	-0.12964388342140087	-0.1468657502000168
BaMo2(PO6)2	3.5584721989582935	4.330716194999996	6 BaMo2(PO6)2 + 6 Li -> Li3Mo3P3O17 + 2 Ba3Mo2(P2O9)2 + 5 MoO3 + Li3PO4	BaMo2(PO6)2 -> Mo2P2O11 + 0.5 O2 + Ba	-0.3631743671108971	-0.13978805328651656	-0.08999693560239752
BaMo2P3O14	3.652320888525808	4.226878643750007	3.667 BaMo2P3O14 + 4.333 Li -> Li3Mo3P3O17 + 3 BaMo(PO4)2 + 0.6667 BaMo2(PO6)2 + 0.3333 Li4P2O7	BaMo2P3O14 -> Mo2P2O11 + 0.5 Ba(PO3)2 + 0.5 Ba	-0.29727626747827074	-0.1328521128223228	-0.12096108161055863
BaMo2Se2O11	3.220294969345237	4.062549048749936	1.286 BaMo2Se2O11 + 4 Li -> BaSe2O5 + 2 Li2MoO4 + 0.2857 BaMoO4 + 0.2857 MoSe2	0.5 BaMo2Se2O11 -> MoO3 + 0.25 BaSeO4 + 0.75 SeO2 + 0.25 Ba	-0.5065090860879629	-0.1525478786428589	-0.14039520388021698
BaMoO4	1.4207177108333302	4.090014929374998	BaMoO4 + 2 Li -> BaMoO3 + Li2O	BaMoO4 -> MoO3 + 0.5 O2 + Ba	-0.36840998697917104	-0.1769454502083352	-3.255658584389029e-14
BaN3Cl	0.6313132045833374	1.0268913499999963	1.5 BaN3Cl + Li -> LiN3 + 0.75 BaN2 + 0.75 BaCl2	0.6667 BaN3Cl -> N2 + 0.3333 BaCl2 + 0.3333 Ba	-0.05879172090608975	-0.2800835333026157	-0.2426367148031512
BaN6	0.7100237620833276	0.9744176450000196	0.75 BaN6 + Li -> LiN3 + 0.75 BaN2	0.3333 BaN6 -> N2 + 0.3333 Ba	-0.08160171720756804	-0.3389605384302765	-0.2517537220816344
BaNa(B3O5)3	1.544278559349054	4.507561457291644	Li + 1.312 Ba(BO2)2 + 0.6875 BaB4O7 -> Ba2Li(BO2)5 + 0.0625 B6O	2 BaNa(B3O5)3 -> Na2B8O13 + O2 + 5 B2O3 + 2 Ba	-0.0046442865406088885	-0.19404297743533627	-0.019081281666672112
BaNa(PO3)3	2.430575801166652	4.764410145301747	1.2 BaNa(PO3)3 + Li -> LiPO3 + 1.2 NaPO3 + 0.6 Ba2P2O7 + 0.2 P	2 BaNa(PO3)3 -> Ba(PO3)2 + BaP4O11 + 0.5 O2 + 2 Na	-0.05632771299259254	-0.14596972140510744	-0.0991038979070078
BaNa2Al4(SiO4)4	0.9556613747395499	3.8350849103016955	0.6 BaNa2Al4(SiO4)4 + 3.2 Li -> Li3AlSiO5 + 0.6 BaSiO3 + 1.2 NaAlO2 + 0.2 LiAlO2 + 0.8 Si	1.25 BaNa2Al4(SiO4)4 -> Al2SiO5 + 0.5 NaAlSi3O8 + 1.25 BaAl2(SiO4)2 + 0.5 O2 + 2 Na	-0.0250666530088397	-0.24577449597778145	-0.013154240372514003
BaNa2Mg(PO4)2	1.339991779509715	3.750980697801776	12 BaNa2Mg(PO4)2 + 17 Li -> Na5Li(PO4)2 + BaP3 + 11 BaNaPO4 + 8 NaLi2PO4 + 12 MgO	6 BaNa2Mg(PO4)2 -> Na4Mg3P4O15 + Mg3(PO4)2 + 2 O2 + 3 Ba2P2O7 + 8 Na	-0.05427217753379976	-0.1851091709677375	-0.00947945552422369
BaNa2Nd2Si4CO15	2.0706020891664947	3.5922939215517764	3 BaNa2Nd2Si4CO15 + 6.222 Li -> Ba3NaNd3(Si3O10)2 + 3.111 Li2SiO3 + 0.3333 NaNd9(Si3O13)2 + 0.8889 Na2SiO3 + 1.444 Na2CO3 + 1.556 C	BaNa2Nd2Si4CO15 -> Nd2Si2O7 + BaCO3 + 2 SiO2 + 0.5 O2 + 2 Na	-0.09259896552885927	-0.25363906814207704	-0.03767646370114175
BaNa4Ti2Si10(BO15)2	1.486966752833331	3.608836014419443	BaNa4Ti2Si10(BO15)2 + 10 Li -> BaSi2O5 + Na2Si2O5 + 5 Li2SiO3 + Na2TiSiO5 + TiB2	1.286 BaNa4Ti2Si10(BO15)2 -> BaTi(SiO3)3 + 0.2857 BaNa(B3O5)3 + 1.571 TiO2 + 9.857 SiO2 + 1.214 O2 + 4.857 Na	-0.04071016589305021	-0.2090375049787292	-0.025731908914724766
BaNa5Ca7P6(O8F)3	1.0744644151247726	3.570992614802201	1.167 BaNa5Ca7P6(O8F)3 + 2 Li -> NaLi2PO4 + 2.417 Na2CaPO4F + 0.1667 BaP2 + 0.8833 Ca5P3O12F + 0.2 Ba5P3O12F + 1.333 CaO	4 BaNa5Ca7P6(O8F)3 -> Na4P2O7 + 7 Na2CaPO4F + 4.2 Ca5P3O12F + 0.8 Ba5P3O12F + 0.5 O2 + 2 Na	-0.03905862503866242	-0.18033629359878867	-0.010423452495895713
BaNaAlF6	1.1112498845833532	6.179435425301748	3 BaNaAlF6 + 3 Li -> Na3Li3Al2F12 + 3 BaF2 + Al	BaNaAlF6 -> BaAlF5 + 0.5 F2 + Na	-0.04785081245153844	-0.09353373695651879	-0.03897255485815809
BaNaB5O9	1.2569031282394656	3.521593293426321	3.235 BaNaB5O9 + 4.706 Li -> Ba2Li(BO2)5 + 1.235 BaNaLi3(BO2)6 + 2 NaBO2 + 0.2941 B6O	1.75 BaNaB5O9 -> Ba(BO2)2 + 0.75 BaNa(B3O5)3 + 0.25 O2 + Na	-0.03351675347102212	-0.21533937810483827	-0.023285158238264714
BaNaBO3	0.6239370492816206	3.3148675999999995	BaNaBO3 + Li -> BaLiBO3 + Na	BaNaBO3 -> NaBO2 + 0.5 O2 + Ba	-0.15198724028221822	-0.3404690380952369	-0.08700154791667769
BaNaCr2F9	2.841036107500102	4.95445350500004	3 BaNaCr2F9 + Li -> Ba3Na2Cr4F20 + 0.3333 CrF3 + 0.3333 Na3Li3Cr2F12 + CrF2	6 BaNaCr2F9 -> Ba3Na2Cr4F20 + 4 NaCrF4 + 3 BaCrF6 + Cr	-0.10254657850000326	-0.0718399051851697	-2.0465662099390336
BaNaCrF6	2.2729652324999066	4.9928267940517195	6 BaNaCrF6 + 3 Li -> Na3CrF6 + Na3Li3Cr2F12 + 6 BaF2 + 3 CrF2	BaNaCrF6 -> BaCrF6 + Na	-0.09567343242499993	-0.09312544978254955	-1.8103109484782682
BaNaFeF6	3.216565064166584	6.26769106217672	6 BaNaFeF6 + 3 Li -> Na3FeF6 + Na3Li3Fe2F12 + 6 BaF2 + 3 FeF2	1.333 BaNaFeF6 -> BaFeF5 + 0.3333 BaF3 + 0.3333 FeF6 + 1.333 Na	-0.13093957000000245	-0.09430706585144844	-0.0659508767658723
BaNaGaF6	2.1793222516666653	6.18216839905173	BaNaGaF6 + 3 Li -> NaF + 3 LiF + BaF2 + Ga	BaNaGaF6 -> BaGaF5 + 0.5 F2 + Na	-0.10068666705909135	-0.0890847903804437	-0.07272762938492061
BaNaH6Ir	0.17649832402298804	1.776688703218395	0.3333 BaNaH6Ir + 1.667 Li -> LiH + 0.3333 BaLiH3 + 0.3333 Na + 0.3333 LiIr	3 BaNaH6Ir -> Ba3(H6Ir)2 + Ir + 3 H2 + 3 Na	-0.10413872810628799	-0.17452189396275797	-0.6112712259027853
BaNaLi3(BO2)6	0.9892840538021241	3.6981703748888655	BaNaLi3(BO2)6 + 2.807 Li -> NaBO2 + 0.8596 BaLiBO3 + 0.8246 Li6B4O9 + 0.1404 BaB6	5.333 BaNaLi3(BO2)6 -> LiO8 + 4 BaNaB5O9 + 1.333 BaNa(B3O5)3 + 15 Li	-0.030942378520052216	-0.2310288157042346	-0.037843631343060125
BaNaNdSi2O7	0.733679350505076	3.255172458426678	12 BaNaNdSi2O7 + 33 Li -> NaNdSiO4 + 11 NaLi3SiO4 + 6 Ba2SiO4 + 3 NdSi2 + 4 Nd2O3	3 BaNaNdSi2O7 -> Ba3NaNd3(Si3O10)2 + 0.5 O2 + 2 Na	-0.09146733507547822	-0.2978312768287088	-0.04787289502676684
BaNaP	0.6632528520833425	0.6679606092600551	Li + Ba5P4 -> Ba4P3 + BaLiP	8 BaNaP -> Ba5P4 + Ba3P4 + 8 Na	-0.3485361589251408	-0.6073304103773074	-1.246025597424266
BaNaP3H3(NO2)3	1.8921064171246766	2.8399165200000143	2.877 BaNaP3H3(NO2)3 + 3.235 Li -> PH8N3O2 + 0.7037 Ba3P6(N4O3)2 + 1.617 NaLi2PO4 + 0.3827 Ba2P2O7 + 0.6296 Na2PHO3 + 0.3951 P	4 BaNaP3H3(NO2)3 -> BaNa(PO3)3 + 2 PH4NO3 + 4 PHN2 + 3 NaPO3 + N2 + 3 Ba	-0.03413799582828769	-0.20688451475611336	-0.3829381461607646
BaNaPO4	0.749740373749999	3.4904062165517087	BaNaPO4 + 8 Li -> BaNaP + 4 Li2O	4 BaNaPO4 -> O2 + 2 Ba2P2O7 + 4 Na	-0.08537003896805251	-0.19128738370967602	-0.023771230966152412
BaNaSc(BO3)2	0.9573865485833315	3.315068304676759	3.25 BaNaSc(BO3)2 + 5 Li -> Na3Sc(BO3)2 + 3 BaLiBO3 + 2 LiScO2 + 0.25 NaScO2 + 0.25 BaB6	BaNaSc(BO3)2 -> Ba(BO2)2 + 0.25 O2 + 0.5 Sc2O3 + Na	-0.10296660473735741	-0.28894550238505223	-0.05068790516120636
BaNaVF6	2.2368275049999813	4.218846856249994	5 BaNaVF6 + 3 Li -> Na3Li3V2F12 + 2 NaVF3 + 5 BaF2 + VF2	BaNaVF6 -> NaVF6 + Ba	-0.11899291123334921	-0.10142766597823938	-0.17667988926470368
BaNaVS4	1.609656522976194	2.391718536666677	3 BaNaVS4 + 4.667 Li -> Na3VS4 + 0.6667 V3S4 + 2.333 Li2S + 3 BaS	1.5 BaNaVS4 -> VS4 + 0.5 Na3VS4 + 1.5 Ba	-0.002936699388890851	-0.20162029662500114	-0.7192056679793606
BaNaZrF7	1.1228884714583298	6.2496106066666925	5 BaNaZrF7 + 12 Li -> Na5Zr2F13 + 12 LiF + 5 BaF2 + 3 Zr	2 BaNaZrF7 -> Na2ZrF6 + 0.5 BaZr2F10 + 1.5 F2 + 1.5 Ba	-0.04495230258721028	-0.07787103489582936	-0.055636196470580934
BaNb2Fe2(PO4)6	3.154504467500144	4.257897081250063	0.6667 BaNb2Fe2(PO4)6 + Li -> LiFePO4 + 0.3333 Nb3Fe(PO4)6 + 0.3333 Ba2P2O7 + 0.3333 NbPO5	1.5 BaNb2Fe2(PO4)6 -> Nb3Fe(PO4)6 + FePO4 + 0.5 BaFe2(P2O7)2 + 0.5 O2 + Ba	-0.11008008410305159	-0.1325522603359559	-0.07821063572289066
BaNb2O6	1.639211857638859	3.8282289360714303	5 BaNb2O6 + 9 Li -> Ba5Nb4O15 + 1.5 Li3NbO4 + 4.5 LiNbO2	BaNb2O6 -> Nb2O5 + 0.5 O2 + Ba	-0.16207412681804767	-0.20864689655423296	-0.01329217143963346
BaNd2BeO5	0.18379157958335934	2.6959195325000023	BaNd2BeO5 + 2 Li -> Li2O + Nd2O3 + Ba + BeO	2 BaNd2BeO5 -> BaO2 + 2 Nd2O3 + 2 BeO + Ba	-0.26582942836539303	-0.4631491492833324	-0.14145091151777667
BaNd2NiO5	1.8441075795833473	2.548824017499988	BaNd2NiO5 + 2 Li -> BaNd2O4 + Li2O + Ni	2 BaNd2NiO5 -> BaNiO3 + 2 Nd2O3 + NiO + Ba	-0.3939085081527809	-0.4658315241833195	-0.16429960260021748
BaNd2O4	0.24930350583333583	2.5648956800000033	BaNd2O4 + 2 Li -> Li2O + Nd2O3 + Ba	2 BaNd2O4 -> BaO2 + 2 Nd2O3 + Ba	-0.32607769488636595	-0.509100482481883	-0.16524251485313357
BaNd2PdO5	2.1011861283333033	2.6757530299999828	4 BaNd2PdO5 + 2 Li -> Li2PdO2 + 2 Ba2PdO3 + 4 Nd2O3 + Pd	2 BaNd2PdO5 -> Ba(PdO2)2 + 2 Nd2O3 + Ba	-0.3848648090416793	-0.44494664478333723	-0.14912429494406299
BaNd2PtO5	2.017791179583325	2.3040525437500103	4 BaNd2PtO5 + 4 Li -> Ba4PtO6 + 2 Li2O + 4 Nd2O3 + 3 Pt	4.5 BaNd2PtO5 -> Ba4(PtO3)3 + 4.5 Nd2O3 + 1.5 Pt + 0.5 Ba	-0.3935974425416493	-0.43987438128333034	-0.14902276582822704
BaNdAgS3	1.6937880991666696	2.351884075000008	2 BaNdAgS3 + 2 Li -> Ba(NdS2)2 + Li2S + BaS + 2 Ag	BaNdAgS3 -> NdS2 + 0.1667 BaS3 + 0.5 Ag2S + 0.8333 Ba	-1.2441534465631118e-15	-0.3055871539322901	-0.7228429158210044
BaNdCuTe3	1.3094497520833315	1.877777889999988	BaNdCuTe3 + Li -> BaTe + 0.5 Nd2Te3 + 0.5 Li2Te + Cu	BaNdCuTe3 -> NdTe3 + Cu + Ba	-0.05236934552325301	-0.32966134655104207	-0.632117305615209
BaNi2(AsO4)2	2.642986491416629	4.069590429999964	6.5 BaNi2(AsO4)2 + 20 Li -> Ni5As2 + 6.667 Li3AsO4 + 8 NiO + 2.167 Ba3(AsO4)2	BaNi2(AsO4)2 -> Ba(AsO3)2 + O2 + 2 Ni	-0.39525658327532076	-0.17731984311475935	-0.037934045450457976
BaNi2(PO4)2	2.6685962437499784	4.067826867500016	2 BaNi2(PO4)2 + 6 Li -> Ba2Ni(PO4)2 + 2 Li3PO4 + 3 Ni	BaNi2(PO4)2 -> BaNiP2O7 + 0.5 O2 + Ni	-0.21259001053820015	-0.14986208973576653	-0.043301326891886927
BaNiO3	2.600300793333349	3.198480914166672	3 BaNiO3 + 5 Li -> Li5NiO4 + 3 BaO + 2 NiO	3 BaNiO3 -> Ni3O4 + 2.5 O2 + 3 Ba	-0.736362692274998	-0.335080598557691	-0.1660420453729352
BaNiP2O7	2.708966695833399	4.302219566249944	2 BaNiP2O7 + 4 Li -> Li4P2O7 + Ba2P2O7 + 2 Ni	BaNiP2O7 -> Ba(PO3)2 + 0.5 O2 + Ni	-0.1343030798301914	-0.14280014876923586	-0.05850351357142669
BaO	0.2687521083333383	2.525998474999994	BaO + 2 Li -> Li2O + Ba	2 BaO -> BaO2 + Ba	-0.5357728229687662	-0.6535422520833594	-0.277044363815792
BaP2	0.8304708008333357	1.0892831924999917	3 BaP2 + 6 Li -> Ba3P4 + 2 Li3P	1.5 BaP2 -> BaP3 + 0.5 Ba	-0.1857235476497645	-0.4297589576391858	-1.3333674162753628
BaP2(HO)4	1.6625185266665854	2.5395785795833405	3 BaP2(HO)4 + 3 Li -> Ba3(PO4)2 + Li3PO4 + 6 H2 + 3 P	3 BaP2(HO)4 -> BaP2(HO2)4 + 4 P + 4 H2O + 2 Ba	-0.07389260587089952	-0.15837243439365722	-0.6284107938425154
BaP2(HO2)4	2.4055436039583036	4.377785766875021	1.125 BaP2(HO2)4 + Li -> LiP(HO2)2 + 0.125 BaP2(HO)4 + 0.5 Ba2P2O7 + H2O	3 BaP2(HO2)4 -> Ba(PO3)2 + 4 PH3O4 + O2 + 2 Ba	-0.049484755224782795	-0.12892984914179517	-0.0655280943817238
BaP2PbO7	2.244908538809514	4.337388404374986	56 BaP2PbO7 + 147 Li -> P7Pb + 49 Li3PO4 + 28 Ba2P2O7 + 55 Pb	BaP2PbO7 -> P2PbO6 + 0.5 O2 + Ba	-0.08898280271831505	-0.1488989613073406	-0.08036527346493916
BaP2PdO7	3.4220068070833976	4.5905485212499775	2 BaP2PdO7 + 4 Li -> Li4P2O7 + Ba2P2O7 + 2 Pd	2 BaP2PdO7 -> Ba(PO3)2 + PdO2 + P2PdO6 + Ba	-0.2016994879763665	-0.13156391805085055	-0.11320722346491685
BaP3	0.8449440666666685	1.2747224940000064	BaP3 + 3 Li -> Li3P + BaP2	4.667 BaP3 -> Ba3P14 + 1.667 Ba	-0.12495096831349128	-0.34436220516642857	-1.2969099764408831
BaP4O11	3.0430645870167288	5.093860249999639	2 BaP4O11 + 3.333 Li -> Ba2Li3(PO3)7 + 0.3333 LiPO3 + 0.6667 P	0.5 BaP4O11 -> P2O5 + 0.25 O2 + 0.5 Ba	-0.08986037966273663	-0.1407714962500073	-0.1756400375426237
BaPO3F	2.509337726166657	4.535325793750003	7 BaPO3F + 5 Li -> BaF2 + 5 LiF + 3 Ba2P2O7 + P	2.5 BaPO3F -> Ba(PO3)2 + 0.5 PF5 + 0.75 O2 + 1.5 Ba	-0.07075017006248752	-0.140557819479173	-0.09081068982906881
BaPS3	1.5768340493750048	2.791265588749991	BaPS3 + 4 Li -> BaS + 2 Li2S + P	4 BaPS3 -> P2S5 + P2S7 + 4 Ba	-2.4512209584326425e-15	-0.14149866812499678	-0.8753277256500005
BaPSe3	1.6504616331250026	2.7326286722500073	BaPSe3 + 4 Li -> BaSe + 2 Li2Se + P	6 BaPSe3 -> BaSe3 + 3 P2Se5 + 5 Ba	-2.0318350322234837e-15	-0.1268201313367865	-0.8715851827083207
BaPb3O4	1.5744312408333363	2.2223694762499537	BaPb3O4 + 6 Li -> BaO + 3 Li2O + 3 Pb	3 BaPb3O4 -> Ba2PbO4 + 8 PbO + Ba	-0.44582794234375234	-0.4245659347916657	-0.13003778884920303
BaPbF6	4.472055808333329	6.45284092250003	0.5 BaPbF6 + Li -> LiF + 0.5 BaF2 + 0.5 PbF2	BaPbF6 -> PbF4 + F2 + Ba	-0.3204070655208362	-0.0685624106249898	-0.13657782539062824
BaPd(SeO3)2	3.1286137814007766	3.7579660987499963	38.5 BaPd(SeO3)2 + 47 Li -> Pd17Se15 + 23.5 Li2SeO4 + 21.5 PdO + 38.5 BaSeO3	2 BaPd(SeO3)2 -> PdSe2O5 + BaSeO4 + PdSeO3 + Ba	-0.5247144668518944	-0.15015961237500064	-0.14267070951388572
BaPdF4	4.037150423333346	4.53036066499995	2 BaPdF4 + 2 Li -> Ba2PdF6 + 2 LiF + Pd	3 BaPdF4 -> PdF3 + 1.5 Ba2PdF6 + 0.5 Pd	-0.4314455730468807	-0.09636635069443833	-0.23271203057693102
BaPr2NiO5	1.8479740183333493	2.5176873462499776	BaPr2NiO5 + 2 Li -> BaPr2O4 + Li2O + Ni	2 BaPr2NiO5 -> BaNiO3 + 2 Pr2O3 + NiO + Ba	-0.40067199048611535	-0.4679906719999982	-0.1642539177964153
BaPr2O4	0.26100540270833894	2.541491886249997	BaPr2O4 + 2 Li -> Li2O + Pr2O3 + Ba	2 BaPr2O4 -> BaO2 + 2 Pr2O3 + Ba	-0.33530062534091787	-0.5110863588043464	-0.16127916958225352
BaPr2PdO5	2.0558733520833132	2.701682783749991	2 BaPr2PdO5 + 2 Li -> Ba2PdO3 + Li2O + 2 Pr2O3 + Pd	2 BaPr2PdO5 -> Ba(PdO2)2 + 2 Pr2O3 + Ba	-0.38835044404167984	-0.4447980950000088	-0.15445799259507975
BaPr2Sc2O7	0.2642120677083071	2.9682018800000374	BaPr2Sc2O7 + 2 Li -> Pr2O3 + Ba + 2 LiScO2	2 BaPr2Sc2O7 -> BaO2 + 4 PrScO3 + Ba	-0.19497096725000418	-0.42003026087499995	-0.11322556444616794
BaPrCuTe3	1.3007428514583275	1.858335362499994	BaPrCuTe3 + Li -> BaTe + 0.5 Pr2Te3 + 0.5 Li2Te + Cu	BaPrCuTe3 -> PrTe3 + Cu + Ba	-0.051961983749999385	-0.31860655418125106	-0.6283013401167648
BaPt2S3	1.5881299211666757	2.139595022500002	3.5 BaPt2S3 + 15 Li -> LiPt7 + 7 Li2S + 3.5 BaS	BaPt2S3 -> PtS2 + PtS + Ba	-0.018953363970589443	-0.19219540991666673	-0.6479287210339588
BaRe2H2O9	1.9478619850476169	4.7024778583333475	1.5 BaRe2H2O9 + 8.75 Li -> Li5ReO6 + 3 LiHO + 0.75 Ba2LiReO6 + 1.25 Re	1.5 BaRe2H2O9 -> Re2O7 + ReH3O5 + 0.75 O2 + 1.5 Ba	-0.29648337740384534	-0.12223670504030282	-2.0906655847958378e-14
BaReH9	0.6264155340476254	1.5388845999999974	BaReH9 + 7 Li -> BaLiH3 + 6 LiH + Re	0.2222 BaReH9 -> H2 + 0.2222 Re + 0.2222 Ba	-0.06314734246427944	-0.11780171926591332	-0.727400144220034
BaReN3	1.3677135688888669	1.6918095587500133	11 BaReN3 + 18 Li -> Re3N + 2.5 Li5ReN4 + 5.5 Ba2LiReN4	3 BaReN3 -> BaN6 + 3 ReN + 2 Ba	-0.21674005808615515	-0.4328875575961266	-0.6183291187938753
BaRuO5	3.1883200916430545	4.719687495784379	36 BaRuO5 + 71 Li -> Li35(RuO4)12 + 12 Ba3LiRu2O9 + 12 Li2O2	17 Ba3LiRu2O9 -> Ba2Ru7O18 + 12.33 BaRuO5 + 7.333 Ba5(RuO5)2 + 17 Li	-0.818624247708307	-0.2695162613257551	-0.11138591070147896
BaS	0.0	2.164256884999995	Li -> Li	2 BaS -> BaS2 + Ba	-0.042136042727273004	-0.3350454433333354	-0.7041194085000138
BaS2	1.9558628533333504	2.283459339999928	BaS2 + 2 Li -> Li2S + BaS	1.5 BaS2 -> BaS3 + 0.5 Ba	-0.016723482500011766	-0.1895153469999995	-0.7744068420588187
BaS3	2.015464080833338	3.0040086071874947	BaS3 + 2 Li -> BaS2 + Li2S	0.3333 BaS3 -> S + 0.3333 Ba	0.0	-0.1381732667187512	-0.784046210138893
BaS4O13	3.906567772083392	3.231090529687495	BaS4O13 + 2 Li -> Li2S2O7 + BaSO4 + SO2	0.2222 BaS4O13 -> O2 + 0.2222 BaSO4 + 0.6667 S	-0.3121461933062486	-0.10325094252777611	-0.1831205225480934
BaSO4	1.6444537345833314	3.9067288342708326	BaSO4 + 8 Li -> BaS + 4 Li2O	1.333 BaSO4 -> BaO2 + 0.3333 BaO10 + 1.333 S	-0.15539262111680596	-0.1166898570833359	-2.5351803745188304e-14
BaSc2O4	0.46471100750001726	2.8625928779166663	0.5 BaSc2O4 + Li -> LiScO2 + 0.5 Ba	2 BaSc2O4 -> BaO2 + 2 Sc2O3 + Ba	-0.20071960048601767	-0.40663724702898163	-0.12940914285519067
BaSc2Si3O10	1.2526592025520935	3.6204237724999975	0.625 BaSc2Si3O10 + Li -> LiScSiO4 + 0.625 BaSiO3 + 0.125 Sc2O3 + 0.25 Si	BaSc2Si3O10 -> Sc2Si2O7 + SiO2 + 0.5 O2 + Ba	-0.06121288923295598	-0.2597666187499996	-0.02592857786189029
BaSc3AgS6	1.731859761666708	2.5536559224999635	BaSc3AgS6 + Li -> LiScS2 + Sc2S3 + BaS + Ag	BaSc3AgS6 -> ScAgS2 + 0.3333 BaS3 + Sc2S3 + 0.6667 Ba	-0.03275143991228324	-0.3114292662499967	-0.7867328297213549
BaScCuS3	1.5171856883333303	2.436333957291665	BaScCuS3 + Li -> BaS + LiScS2 + Cu	2 BaScCuS3 -> CuS2 + Sc2S3 + CuS + 2 Ba	-0.009100291309526387	-0.2719777253515603	-0.7374116760272387
BaSe	0.0	2.139112049999997	Li -> Li	2 BaSe -> BaSe2 + Ba	-0.019834017272728488	-0.22030454069437488	-0.4629273543749999
BaSe2	1.8480405133333502	2.256129834999924	BaSe2 + 2 Li -> Li2Se + BaSe	1.5 BaSe2 -> BaSe3 + 0.5 Ba	-0.00815373104403383	-0.17912480779328888	-0.477679782777751
BaSe2O5	2.7243693154948003	3.816370976249985	2 BaSe2O5 + 2 Li -> Li2SeO4 + 2 BaSeO3 + Se	2 BaSe2O5 -> BaSeO4 + 3 SeO2 + Ba	-0.45324802321875346	-0.16035762789473829	-0.1561192982051347
BaSeO3	1.9219178583333347	3.3787622587499997	BaSeO3 + 6 Li -> BaSe + 3 Li2O	3 BaSeO3 -> BaSeO4 + BaSe2O5 + Ba	-0.3258431265937505	-0.18039766191176798	-0.09368149979166818
BaSeO4	2.4190442095833333	4.576192877499987	BaSeO4 + 2 Li -> Li2O + BaSeO3	2 BaSeO4 -> Se2O5 + 1.5 O2 + 2 Ba	-0.5000842760649693	-0.12927570065972516	-0.010782664490755156
BaSi(S2O7)3	4.168261545520828	3.2020134437500056	BaSi(S2O7)3 + 1.333 Li -> BaS4O13 + 0.6667 Li2S2O7 + SiO2 + 0.6667 SO2	BaSi(S2O7)3 -> BaS4O13 + SiO2 + 3 O2 + 2 S	-0.32426399761583324	-0.11643997091517644	-0.19296135610240928
BaSi2(BO4)2	1.303695386302067	3.810721154374919	5.5 BaSi2(BO4)2 + 16 Li -> Ba2Li(BO2)5 + 7.5 Li2SiO3 + B6O + 3.5 BaSiO3	2 BaSi2(BO4)2 -> BaB4O7 + 4 SiO2 + 0.5 O2 + Ba	-0.030414657433885495	-0.20864582047171298	-0.0243610305894566
BaSi2(NO)2	1.026131386666492	1.4724164562499726	8.333 BaSi2(NO)2 + 2 Li -> Ba(Si3N4)2 + 0.6667 Ba3Si6N4O9 + 2.667 Ba2SiO4 + 2 LiSi2N3	4.8 BaSi2(NO)2 -> Ba3Si6N4O9 + 0.6 BaSi6N8O + 0.1333 BaN6 + 1.067 Ba	-0.1107076690971267	-0.4292424766304359	-0.5659793188592523
BaSi2O5	1.25488169895839	3.61685399375001	2 BaSi2O5 + 1.333 Li -> Ba2Si3O8 + 0.6667 Li2SiO3 + 0.3333 Si	0.5 BaSi2O5 -> SiO2 + 0.25 O2 + 0.5 Ba	-0.06014959196691194	-0.24329701700000017	-0.03368691321429784
BaSi3SnO9	2.1312070845833615	3.7611809250000268	2 BaSi3SnO9 + 8 Li + 3 SnO2 -> Sn5O6 + 4 Li2SiO3 + 2 BaSiO3	BaSi3SnO9 -> SnO2 + 3 SiO2 + 0.5 O2 + Ba	-0.12761771680903689	-0.2064206457838953	-0.01795624710528232
BaSi6N8O	1.089809343333343	1.6292654937500286	2 BaSi6N8O + 2 Li -> Ba(Si3N4)2 + BaSi2(NO)2 + 2 LiSi2N3	9 BaSi6N8O -> Ba3Si6N4O9 + 0.6667 BaN6 + 16 Si3N4 + 5.333 Ba	-0.0610989226863099	-0.43367618082031223	-0.7202462728653494
BaSi7N10	1.0148969608332763	1.5761808912500128	5 BaSi7N10 + 6 Li -> Ba2Si5N8 + 3 Ba(Si3N4)2 + 6 LiSi2N3	9 BaSi7N10 -> BaN6 + 21 Si3N4 + 8 Ba	-0.06622361552422618	-0.44059572455128326	-0.7553773190133923
BaSiF6	1.772818995833314	6.498914377500012	0.25 BaSiF6 + Li -> LiF + 0.25 BaF2 + 0.25 Si	BaSiF6 -> F2 + SiF4 + Ba	-0.034017345312502556	-0.06430425212500923	-0.10654960319442974
BaSiN2	0.19014879302082865	1.0479016967187733	BaSiN2 + 2 Li -> Li2SiN2 + Ba	5 BaSiN2 -> Ba2Si5N8 + 0.3333 BaN6 + 2.667 Ba	-0.33666765531247833	-0.5940380814285722	-0.8400456420885662
BaSiO3	0.8040477545833404	3.5490314537500027	4 BaSiO3 + 4 Li -> Li4SiO4 + 2 Ba2SiO4 + Si	3 BaSiO3 -> Ba2Si3O8 + 0.5 O2 + Ba	-0.08950430567500511	-0.29007957779411786	-0.042866611990763914
BaSiP4(HO7)2	2.6317763379523846	4.656482793749955	4.2 BaSiP4(HO7)2 + 7 Li -> BaP2(HO2)4 + 1.6 Ba2Li3(PO3)7 + 2.2 LiP(HO2)2 + 4.2 SiO2 + 1.4 P	3 BaSiP4(HO7)2 -> BaP4O11 + 2 PH3O4 + 3 SiP2O7 + O2 + 2 Ba	-0.0567881979388396	-0.139442262892153	-0.12569771751589354
BaSm2CoO5	1.7761872815833333	2.0102564306249735	BaSm2CoO5 + 1.111 Li -> BaSm2O4 + 0.1111 Li10Co4O9 + 0.5556 Co	3 BaSm2CoO5 -> Ba2CoO4 + 3 Sm2O3 + 2 CoO + Ba	-0.33688279240278085	-0.44757921139999857	-0.1319723994697073
BaSm2NiO5	1.8510619820833436	2.564470493749986	BaSm2NiO5 + 2 Li -> BaSm2O4 + Li2O + Ni	2 BaSm2NiO5 -> BaNiO3 + 2 Sm2O3 + NiO + Ba	-0.3904246930969215	-0.4516735399999985	-0.16013294128938682
BaSm2O4	0.2345258652083334	2.594450961250008	BaSm2O4 + 2 Li -> Li2O + Sm2O3 + Ba	2 BaSm2O4 -> BaO2 + 2 Sm2O3 + Ba	-0.31011472215909475	-0.4931417581521731	-0.15427327240436028
BaSm2PdO5	2.263208375833308	2.5947419062500043	4 BaSm2PdO5 + 2 Li -> Li2PdO2 + 2 Ba2PdO3 + 4 Sm2O3 + Pd	2 BaSm2PdO5 -> Ba(PdO2)2 + 2 Sm2O3 + Ba	-0.38052657837498227	-0.43469371640000265	-0.14612797296420643
BaSm2Sc2O7	0.37066558645835457	2.991464665000023	BaSm2Sc2O7 + 2 Li -> Sm2O3 + Ba + 2 LiScO2	2 BaSm2Sc2O7 -> BaO2 + 4 SmScO3 + Ba	-0.19136369662493102	-0.416325730875001	-0.10889029295225283
BaSmC2O6F	2.2801559258333177	4.2369585608333695	1.5 BaSmC2O6F + 2 Li -> Li2CO3 + 1.5 SmOF + 1.5 BaCO3 + 0.5 C	BaSmC2O6F -> CO2 + BaCO3 + 0.3333 SmF3 + 0.5 O2 + 0.6667 Sm	-0.14540798090321605	-0.17550233692857287	-0.024193809891302376
BaSn(GeO3)3	2.120043520555569	3.7410744275001337	BaSn(GeO3)3 + 2 Li -> SnO + 0.6667 BaGeO3 + 0.3333 BaGe4O9 + Li2GeO3	1.333 BaSn(GeO3)3 -> BaGe4O9 + 1.333 SnO2 + 0.1667 O2 + 0.3333 Ba	-0.2666273739388205	-0.18454523018383484	-0.021707549083333166
BaSn(HO)6	1.8409107498958068	3.4998655633334037	4 BaSn(HO)6 + 8 Li -> BaH4O3 + BaH8O5 + 8 LiHO + 2 BaSn2(HO2)2	4 BaSn(HO)6 -> Ba(H2O3)2 + 4 SnO2 + 10 H2O + 3 Ba	-0.1630923999340279	-0.21069801467103533	-0.042106670555529746
BaSn2(HO2)2	1.57440445708332	1.9783696887499715	0.5 BaSn2(HO2)2 + Li -> LiHO + 0.25 Ba2SnO4 + 0.75 Sn	3 BaSn2(HO2)2 -> Sn5O6 + BaSn(HO)6 + 2 Ba	-0.24240054537498512	-0.28099274297617916	-0.30671410086364315
BaSn2S3	1.5632925358333423	2.0627945695833554	BaSn2S3 + 2 Li -> BaSnS2 + Li2S + Sn	11 BaSn2S3 -> Ba8Sn4S15 + 18 SnS + 3 Ba	-0.026214655892862204	-0.18765746933333194	-0.740555541421567
BaSnF4	2.4388622733333407	2.963376861249987	0.5 BaSnF4 + Li -> LiF + 0.5 BaF2 + 0.5 Sn	2 BaSnF4 -> BaSnF6 + SnF2 + Ba	-0.13520952609999703	-0.1153807566666587	-0.30432843250000063
BaSnF6	2.876762825833292	6.406341050625006	BaSnF6 + 2 Li -> BaSnF4 + 2 LiF	BaSnF6 -> BaF3 + 1.5 F2 + Sn	-0.14080592427083038	-0.049877409124994276	-0.10515926086804961
BaSnHgS4	1.8515571839583058	2.5314136674999927	2 BaSnHgS4 + 4 Li -> Ba2SnS4 + Li4SnS4 + 2 Hg	BaSnHgS4 -> SnS2 + 0.3333 BaS3 + HgS + 0.6667 Ba	-0.0014996206756765496	-0.16183776130434957	-0.7042710219196426
BaSnS2	1.4978441733333296	2.043736424583395	BaSnS2 + 2 Li -> Li2S + BaS + Sn	18 BaSnS2 -> Ba8Sn4S15 + 7 BaSn2S3 + 3 Ba	-0.03167194625000169	-0.23514997468750032	-0.7403699744642822
BaSr2(PN2)6	0.7049749748560599	2.371859580416685	5 BaSr2(PN2)6 + 110 Li -> Ba5P4 + 2 LiPN2 + 14 Li7PN4 + 10 SrLiP	1.5 BaSr2(PN2)6 -> P3N5 + 3 Sr(PN2)2 + 0.5 N2 + 1.5 Ba	-0.05479592610360218	-0.32652842961904827	-0.7497383672635918
BaSr2Mg(SiO4)2	0.634822984124952	3.3662278250000544	1.6 BaSr2Mg(SiO4)2 + 2 Li -> SrLi2SiO4 + 0.2 BaSi2 + 0.7 Ba2SiO4 + 1.6 MgO + 1.1 Sr2SiO4	2 BaSr2Mg(SiO4)2 -> BaO2 + 2 Sr2MgSi2O7 + Ba	-0.11596326606446716	-0.3324119313333198	-0.06308852405865029
BaSr3(CoO3)4	3.3705631808333623	3.327633215333312	2 BaSr3(CoO3)4 + 2 Li -> Sr6(CoO3)5 + Li2CoO3 + 2 BaCoO3	BaSr3(CoO3)4 -> BaCoO3 + 0.5 SrCo6O11 + 1.75 O2 + 2.5 Sr	-0.5669014074129857	-0.3058559952083373	-0.13279063732758845
BaSrMn2Al9PbO20	3.0505839665972445	3.0856325958659094	1.667 BaSrMn2Al9PbO20 + Li -> Mn2O3 + 0.6667 LiMn2O4 + 1.667 Al2PbO4 + 1.667 SrAl4O7 + 0.3333 LiAl5O8 + 1.667 BaAl2O4	1.452 BaSrMn2Al9PbO20 -> Al2PbO4 + 0.1507 Pb3O4 + 0.363 BaMn8O16 + 0.08219 Ba7Al64O103 + 1.452 SrAl4O7 + 0.5137 Ba	-0.17706911736908548	-0.29976070587008863	-0.05184503993820577
BaSrTa2O7	0.9179155638333376	3.464298794999989	4 BaSrTa2O7 + 2.5 Li -> Ba4LiTa3O12 + 2 Sr2Ta2O7 + 0.5 Li3TaO4 + 0.5 Ta	BaSrTa2O7 -> SrTa2O6 + 0.5 O2 + Ba	-0.09427343590015536	-0.27283788480769067	-0.042192412291664816
BaTa2O6	1.7140040158335645	3.7704429193750078	3 BaTa2O6 + Li -> LiTaO3 + Ba3Ta5O15	3 BaTa2O6 -> BaTa6O16 + O2 + 2 Ba	-0.08120907210979045	-0.23336830803030173	-0.022272958368047213
BaTa6O16	1.749817264665829	3.8228085300000383	1.167 BaTa6O16 + 1.25 Li -> BaTa2O6 + 1.25 LiTa3O8 + 0.08333 Ba2Ta15O32	0.3333 BaTa6O16 -> Ta2O5 + 0.1667 O2 + 0.3333 Ba	-0.07185149963131288	-0.20840593735294632	-0.03870377787234247
BaTaF7	1.901857360333322	6.382738326500002	1.2 BaTaF7 + Li -> LiTaF6 + 1.2 BaF2 + 0.2 Ta	BaTaF7 -> BaF3 + 2 F2 + Ta	-0.08249366439100392	-0.061218674642842696	-0.1073237329741441
BaTb2O4	0.26295453458332296	2.608470503749948	0.5 BaTb2O4 + Li -> LiTbO2 + 0.5 Ba	2 BaTb2O4 -> BaO2 + 2 Tb2O3 + Ba	-0.28724542761364535	-0.473534246521746	-0.15024632082650946
BaTbAgS3	1.900967697916665	2.1847425416666977	2 BaTbAgS3 + 2 Li -> Ba(TbS2)2 + Li2S + BaS + 2 Ag	8 BaTbAgS3 -> Ba2Ag8S7 + 0.5 BaS2 + 4 Ba(TbS2)2 + 1.5 Ba	-0.02196453389707198	-0.31059603281249437	-0.741414206976063
BaTbAgTe3	1.2112865416666754	2.010480892500007	2 BaTbAgTe3 + 2 Li -> Ba(TbTe2)2 + BaTe + Li2Te + 2 Ag	3 BaTbAgTe3 -> TbAgTe2 + 2 TbTe3 + Ag2Te + 3 Ba	-0.06289276077546502	-0.3266689122281212	-0.6486618221348524
BaTbCuTe3	1.30685543833334	1.9803732899999864	2 BaTbCuTe3 + 2 Li -> Ba(TbTe2)2 + BaTe + Li2Te + 2 Cu	BaTbCuTe3 -> TbTe3 + Cu + Ba	-0.07293362842593254	-0.33442287761875056	-0.653909539697592
BaTe	-0.0	1.9293223624999967	Li -> Li	2 BaTe -> BaTe2 + Ba	-0.0433450050677342	-0.3062883471266664	-0.5707039611125793
BaTe2F10	3.165834482083334	4.512110791249993	0.125 BaTe2F10 + Li -> LiF + 0.125 BaF2 + 0.25 Te	BaTe2F10 -> TeF6 + TeF4 + Ba	-0.1832156190540537	-0.06030335670000264	-0.23303768913793865
BaTe4O9	2.6915199125480953	3.2131944868749724	0.9375 BaTe4O9 + 2.167 Li -> Li2Te2O5 + 0.1667 LiTe3 + 0.3125 Ba3Te4O11	2 BaTe4O9 -> BaTeO4 + 7 TeO2 + Ba	-0.3486638013672012	-0.2174281933823221	-0.20870322918367679
BaTeO3	1.889538487976182	2.727191281249977	9 BaTeO3 + 14 Li -> Ba5Li2(TeO5)3 + 2 Li6TeO6 + 4 BaTe	5 BaTeO3 -> BaTeO4 + Ba3Te4O11 + Ba	-0.3233061391477561	-0.27017649441172664	-0.16231619293103527
BaTeO4	2.7061552623333363	4.042523323749995	2 BaTeO4 + 2 Li -> BaTeO3 + 0.2 Ba5Li2(TeO5)3 + 0.4 Li4TeO5	BaTeO4 -> TeO3 + 0.5 O2 + Ba	-0.4193051307812441	-0.19485075874999858	-0.041103507616252255
BaTeS3	2.15653447250002	3.1092603559374985	3 BaTeS3 + Li -> LiTe3 + 3 BaS3	0.3333 BaTeS3 -> S + 0.3333 Te + 0.3333 Ba	-0.008417887419352788	-0.12285585965517509	-0.7541987855263137
BaTi(IO3)6	3.849067956333515	4.321064245000013	2.2 BaTi(IO3)6 + 2 Li -> Li2Ti(IO3)6 + 1.2 TiI2O7 + 2.2 Ba(IO3)2 + 0.4 I	0.5 BaTi(IO3)6 -> I2O5 + 0.5 TiI2O7 + 0.25 O2 + 0.5 Ba	-0.7690132147265825	-0.17299554754477686	-0.081012054957734
BaTi(S2O7)3	3.7008798180989935	3.253944746796872	0.75 BaTi(S2O7)3 + 2 Li -> Li2S2O7 + 0.75 TiSO5 + 0.75 BaSO4 + SO2	BaTi(S2O7)3 -> TiSO5 + BaSO4 + 6 O2 + 4 S	-0.29525149288314445	-0.10376802302013899	-0.15877208655253172
BaTi(SiO3)3	1.3632055006249857	3.717807381249995	2.25 BaTi(SiO3)3 + 3 Li -> LiTi2O4 + 0.25 TiSi + Li2Si2O5 + 2.25 BaSi2O5	0.3333 BaTi(SiO3)3 -> SiO2 + 0.3333 TiO2 + 0.1667 O2 + 0.3333 Ba	-0.05855378615994056	-0.21543507688559638	-0.025111152391668057
BaTi2O5	1.1335820683333822	3.55807019900001	5 BaTi2O5 + 2 Li -> Li2TiO3 + 3 BaTiO3 + Ba2Ti6O13	6.5 BaTi2O5 -> Ba4Ti13O30 + 1.25 O2 + 2.5 Ba	-0.11147319966390956	-0.2646474145000042	-0.03537911857138809
BaTiF6	1.7033875105555296	6.50712392750004	3 BaTiF6 + 3 Li -> Li3TiF6 + 2 TiF3 + 3 BaF2	BaTiF6 -> TiF4 + F2 + Ba	-0.06571942070312797	-0.0631887623749976	-0.0936950431076391
BaTiO3	0.7885552633333717	3.3082451599999816	2 BaTiO3 + Li -> LiTiO2 + Ba2TiO4	2 BaTiO3 -> BaTi2O5 + 0.5 O2 + Ba	-0.15833076459333917	-0.3282766439705891	-0.06819262936915393
BaTiOF4	1.7299558820833045	4.177946739999926	BaTiOF4 + 2 Li -> TiO + 2 LiF + BaF2	1.5 BaTiOF4 -> BaTiF6 + 0.5 TiO2 + 0.25 O2 + 0.5 Ba	-0.07248351732144354	-0.14146375365383168	-0.06823323410555115
BaTlVO4	2.117036874166641	3.2053298887500206	3 BaTlVO4 + 3 Li -> Ba3V2O8 + Li3VO4 + 3 Tl	3 BaTlVO4 -> Ba2V2O7 + 0.5 Tl2O3 + 0.5 Tl4V2O7 + Ba	-0.2999443925555534	-0.21116268283018336	-0.09492510875000981
BaTm2F8	0.2886833261111139	6.455382139305564	0.1667 BaTm2F8 + Li -> LiF + 0.1667 BaF2 + 0.3333 Tm	BaTm2F8 -> BaF3 + 2.5 F2 + 2 Tm	-1.4375901842682155e-15	-9.769962616701378e-15	-0.031745622571424104
BaV10O15	1.4785701024317044	1.2296809843743082	5 BaV10O15 + 30.5 Li -> Ba5V5O14 + 30.5 LiVO2 + 14.5 V	0.2 BaV10O15 -> V2O3 + 0.2 Ba	-0.30760418032363646	-0.2791086831395364	-0.35093018165229495
BaV2(CoO4)2	3.203664984583245	3.568751781250077	6 BaV2(CoO4)2 + 4 Li -> Co3O4 + 3 Ba2V2O7 + 2 Li2V3CoO8 + 7 CoO	4 BaV2(CoO4)2 -> Co3O4 + 1.5 Ba2V2O7 + 2.5 V2Co2O7 + Ba	-0.3653192548850601	-0.1868538993367288	-0.09484688313333844
BaV2(NiO4)2	2.6965225221665357	3.8659891687501857	4.667 BaV2(NiO4)2 + 5 Li -> V3O5 + 2.333 Ba2V2O7 + 1.667 Li3VO4 + 9.333 NiO	3 BaV2(NiO4)2 -> Ba2V2O7 + 2 V2Ni3O8 + 0.5 O2 + Ba	-0.39603295060293453	-0.1898460059183673	-0.03254141786292797
BaV2(P2O7)2	2.285995143437492	3.832227762499959	1.231 BaV2(P2O7)2 + 3.692 Li -> Li3V2(PO4)3 + 0.6154 Ba2P2O7 + 0.4615 VP + 0.2308 Li3PO4	0.5 BaV2(P2O7)2 -> VP2O7 + 0.5 Ba	-0.07867524565701256	-0.13716550032048302	-0.17589379114175685
BaV2(PO5)2	3.5903376958333624	3.771737374999921	5 BaV2(PO5)2 + 2 Li -> BaV2(P2O7)2 + 2 LiVPO5 + 2 Ba2VP2O9 + 4 VO2	0.5 BaV2(PO5)2 -> VPO5 + 0.5 Ba	-0.19505946852177214	-0.14819647567880456	-0.14013043101639333
BaV2H2(Se2O7)2	3.2457941834186568	3.685091091249784	0.5196 BaV2H2(Se2O7)2 + 0.8627 Li -> VO2 + 0.8627 LiHSeO3 + 0.5196 BaSe2O5 + 0.01961 V2Se9 + 0.08824 H2O	3 BaV2H2(Se2O7)2 -> BaV2H2Se2O11 + 4 V(SeO3)2 + BaSe2O5 + 2 H2O + Ba	-0.41790780243902104	-0.15369773601647996	-0.17285972069543742
BaV2H2Se2O11	3.481865003333443	3.7722538924998337	BaV2H2Se2O11 + Li -> LiV2O5 + BaSe2O5 + H2O	1.333 BaV2H2Se2O11 -> V2Se2O9 + 0.3333 V2O5 + 1.333 H2O + 0.6667 BaSeO4 + 0.6667 Ba	-0.3928483642604199	-0.14930206187498984	-0.13783952426470814
BaV2O6	3.366714618333358	4.085585651666678	3 BaV2O6 + Li -> LiV2O5 + Ba3V4O13	BaV2O6 -> V2O5 + 0.5 O2 + Ba	-0.3370597591666611	-0.17082448550000318	-0.05131235754632968
BaV2TeO8	3.2201571812500482	3.83702246833332	3 BaV2TeO8 + 1.5 Li -> Ba3V4O13 + 1.5 VTeO4 + 0.5 Li3VO4 + 1.5 TeO2	2 BaV2TeO8 -> BaV2O6 + Te2O5 + V2O5 + Ba	-0.3558867343973251	-0.18281788114583963	-0.12349917565101487
BaVAsO6	3.1731651499999174	4.210222054999998	1.333 BaVAsO6 + Li -> VO2 + 0.5 Ba2As2O7 + 0.3333 Li3AsO4 + 0.1667 Ba2V2O7	2 BaVAsO6 -> Ba(AsO3)2 + V2O5 + 0.5 O2 + Ba	-0.34880350952383443	-0.16656878230552463	-0.061958092053536085
BaVCdF7	2.5926493408333364	4.4218781975	2 BaVCdF7 + 4 Li -> LiVF4 + Li3VF6 + 2 BaF2 + 2 Cd	BaVCdF7 -> VF4 + BaF2 + 0.5 CdF2 + 0.5 Cd	-0.15743166063081326	-0.08803696659087734	-0.18054559430555095
BaVClO3	3.0938368208333245	4.087371740000017	4 BaVClO3 + Li -> LiV2O5 + Ba2V2O7 + 2 BaCl2	2.286 BaVClO3 -> BaCl2 + 0.1429 Ba(ClO4)2 + 1.143 V2O5 + 1.143 Ba	-0.2901807876041578	-0.16821109688724634	-0.09440839115278177
BaVPO6	3.57555587562487	4.152376018750028	8 BaVPO6 + 4 Li -> LiVPO5 + 2 BaV2O6 + 3 Ba2VP2O9 + Li3PO4	BaVPO6 -> VPO5 + 0.5 O2 + Ba	-0.25555532645082746	-0.1495623360442997	-0.0676420881250186
BaVZnF7	2.4230588438888727	4.201162747500015	1.333 BaVZnF7 + 3 Li -> Li3VF6 + 0.3333 VF2 + 1.333 BaF2 + 1.333 Zn	BaVZnF7 -> VF4 + 0.5 BaZnF4 + 0.5 BaF2 + 0.5 Zn	-0.15524198693030744	-0.0890226909090881	-0.19075880537035816
BaWF7	3.281855468833324	3.4078768949999794	1.2 BaWF7 + Li -> LiWF6 + 1.2 BaF2 + 0.2 W	BaWF7 -> WF6 + 0.5 BaF2 + 0.5 Ba	-0.29469903036932	-0.08896359674603094	-0.2657873039627674
BaWO4	1.8451655674999983	3.792565142499996	5 BaWO4 + 6 Li -> Ba5Li2(WO5)3 + Li4WO5 + W	BaWO4 -> WO3 + 0.5 O2 + Ba	-0.35398810767858135	-0.20151406406249572	-0.020146844239122164
BaY2F8	0.46923610277773165	6.225462735000007	BaY2F8 + 0.75 Li -> BaYF5 + 0.75 LiYF4 + 0.25 Y	BaY2F8 -> F2 + 2 YF3 + Ba	-0.043257755306169265	-0.07912037815218076	-0.0284211661428575
BaY2O4	2.6607505833333143	2.620311791249994	2 Li + BaO2 -> Li2O + BaO	2 BaY2O4 -> BaO2 + 2 Y2O3 + Ba	-0.2798402089772889	-0.47628397097826003	-0.14928885607240172
BaY2Si3O10	1.0863382889583868	3.565329570416613	0.75 BaY2Si3O10 + Li -> LiYSiO4 + 0.25 Y2SiO5 + 0.75 BaSiO3 + 0.25 Si	2 BaY2Si3O10 -> BaSi2O5 + 2 Y2Si2O7 + 0.5 O2 + Ba	-0.05923130531258636	-0.2676127324999982	-0.040567998227279745
BaYAgSe3	1.6245660766666479	2.3299013680555785	BaYAgSe3 + Li -> LiYSe2 + BaSe + Ag	2 BaYAgSe3 -> BaSe2 + BaSe3 + Ag2Se + 2 Y	-0.007570196999624912	-0.22079916236972785	-0.5214293564662469
BaYAgTe3	1.2304537754166756	1.94460750072223	2 BaYAgTe3 + 2 Li -> Ba(YTe2)2 + BaTe + Li2Te + 2 Ag	6 BaYAgTe3 -> YTe3 + 3 BaTe3 + 3 Ba(AgTe)2 + 5 Y	-0.06438449734953577	-0.3271889950406266	-0.6450813634990864
BaYCuS3	1.3347422808333462	2.491046172916666	2 BaYCuS3 + 2 Li -> Ba(YS2)2 + BaS + Li2S + 2 Cu	2 BaYCuS3 -> CuS2 + Y2S3 + CuS + 2 Ba	0.0	-0.2851634231640663	-0.7190959481527064
BaYCuSe3	1.4147922633333336	2.3458853011111156	BaYCuSe3 + Li -> BaSe + LiYSe2 + Cu	BaYCuSe3 -> BaSe2 + CuSe + Y	-0.003011144464279525	-0.21757127176913915	-0.5138955191359416
BaYCuTe3	1.319143307083337	1.917930587222224	2 BaYCuTe3 + 2 Li -> Ba(YTe2)2 + BaTe + Li2Te + 2 Cu	BaYCuTe3 -> BaTe2 + CuTe + Y	-0.07379049416666517	-0.33432081543125025	-0.6497939025672155
BaYFeO4	1.88492009083307	2.9788243498958424	6 BaYFeO4 + Li -> LiFeO2 + Ba6Y2Fe4O15 + 2 Y2O3 + FeO	1.5 BaYFeO4 -> BaFeO3 + 0.25 Fe2O3 + 0.75 Y2O3 + 0.5 Ba	-0.32358110622252756	-0.40439059470589767	-0.12188770098165147
BaYSi4N7	0.6992176370833167	1.2957446206250327	0.6667 BaYSi4N7 + Li -> LiSi2N3 + 0.1667 BaSi + 0.5 BaSiN2 + 0.6667 YN	3.5 BaYSi4N7 -> BaSi7N10 + 1.167 Y3Si6N11 + 0.2778 BaN6 + 2.222 Ba	-0.1735079110243003	-0.5105402090454514	-0.8024421125544281
BaYZn3GaO7	1.4038783520918208	3.1541783275001007	5.829 BaYZn3GaO7 + 28 Li -> BaZn13 + 0.05714 Ba6Y2Ga4O15 + 5.6 Li5GaO4 + 4.486 BaZnO2 + 2.857 Y2O3	4 BaYZn3GaO7 -> Ba3Ga4O9 + 0.5 BaO2 + 12 ZnO + 2 Y2O3 + 0.5 Ba	-0.34262623243571877	-0.3031448494256752	-0.07813179320511132
BaZn(SeO3)2	2.5880884700000273	3.478802600624983	1.667 BaZn(SeO3)2 + 2 Li -> ZnO + Li2SeO4 + 0.6667 ZnSe + 1.667 BaSeO3	3 BaZn(SeO3)2 -> BaSeO4 + BaSe2O5 + 3 ZnSeO3 + Ba	-0.4260151560554837	-0.1655320029891123	-0.12730394692527058
BaZn2(AsO4)2	2.64486113656249	4.127820829375001	2.5 BaZn2(AsO4)2 + 4 Li -> Zn3(AsO3)2 + 1.333 Li3AsO4 + 2 ZnO + 0.8333 Ba3(AsO4)2	BaZn2(AsO4)2 -> Ba(AsO3)2 + O2 + 2 Zn	-0.3339571203196483	-0.16751462729514754	-0.0493767259195641
BaZn2(PO4)2	2.050990972708292	4.2509230349999925	1.5 BaZn2(PO4)2 + 4 Li -> Li4Zn(PO4)2 + 0.5 Ba3(PO4)2 + 2 Zn	BaZn2(PO4)2 -> BaZnP2O7 + 0.5 O2 + Zn	-0.12186589443692686	-0.13846685068493425	-0.050662195775831975
BaZn2Si2O7	1.945787878020798	3.6460143200000075	2.5 BaZn2Si2O7 + 4 Li -> Ba2ZnSi2O7 + 0.5 BaSi2O5 + 2 Li2ZnSiO4 + 2 Zn	BaZn2Si2O7 -> Zn2SiO4 + SiO2 + 0.5 O2 + Ba	-0.20272193530259663	-0.23576185981250397	-0.03515735342103676
BaZnCO3F2	2.5868667195833304	4.060616475000015	0.75 BaZnCO3F2 + Li -> LiF + 0.5 BaCO3 + 0.75 ZnO + 0.25 BaF2 + 0.25 C	BaZnCO3F2 -> CO2 + BaF2 + 0.5 O2 + Zn	-0.2283117069834213	-0.13898480663461998	-0.06554192218749266
BaZnCl4	1.921990000833343	4.2578643024999945	0.5 BaZnCl4 + Li -> LiCl + 0.5 BaCl2 + 0.5 Zn	BaZnCl4 -> Cl2 + ZnCl2 + Ba	-0.07568388369447954	-0.09902382488636208	-0.07850173718748854
BaZnCuF7	4.769057018333356	6.262404858125018	2 BaZnCuF7 + Li -> LiCu2F6 + 2 BaZnF4	3 BaZnCuF7 -> Ba2ZnCu3F14 + BaF3 + 2 F2 + 2 Zn	-0.38340299626291596	-0.06079750147726504	-0.17712434016250045
BaZnF4	2.3964325408333416	5.937942905000055	0.5 BaZnF4 + Li -> LiF + 0.5 BaF2 + 0.5 Zn	1.2 BaZnF4 -> BaF3 + 0.1 Ba2Zn7F18 + 0.5 Zn	-0.15941693178271477	-0.11619499680554046	-0.10327257678570678
BaZnMoF7	2.6362623024999747	3.5765763287499674	BaZnMoF7 + 3 Li -> BaZnF4 + 3 LiF + Mo	1.5 BaZnMoF7 -> ZnMoF6 + 1.5 BaF2 + 0.5 MoF3 + 0.5 Zn	-0.2189312557264631	-0.09417991920454627	-0.2471767085227352
BaZnO2	1.2699955076983933	2.7586083083333466	34.33 BaZnO2 + 28 Li -> BaZn13 + 4.667 Li6ZnO4 + 16.67 Ba2ZnO3	2 BaZnO2 -> BaO2 + 2 ZnO + Ba	-0.4500249997321437	-0.4626188338541626	-0.18464550514493583
BaZnP2O7	2.5495878776041963	4.313533886249979	1.25 BaZnP2O7 + Li -> LiZnPO4 + 0.08333 BaZn2(PO4)2 + 0.08333 ZnP2 + 0.5833 Ba2P2O7	BaZnP2O7 -> Ba(PO3)2 + 0.5 O2 + Zn	-0.09673173090645504	-0.13880837861538953	-0.06922120088766537
BaZnSO	1.298729098333324	1.7878122402678593	BaZnSO + 1.5 Li -> BaS + 0.25 Li6ZnO4 + 0.75 Zn	5 BaZnSO -> ZnO + 4 ZnS + BaSO4 + 4 Ba	-0.26989799849703333	-0.42270654156249776	-0.5860847655952439
BaZnSnS4	1.8137604150520943	2.4943275741517903	11 BaZnSnS4 + 8 Li -> Ba8Sn4S15 + 4 Li2ZnSnS4 + 3 BaSnS2 + 7 ZnS	BaZnSnS4 -> SnS2 + ZnS + 0.3333 BaS3 + 0.6667 Ba	-0.027721619222953464	-0.16379765076086805	-0.6998548463293435
BaZnTe2O7	2.897047035833344	3.4779135347917123	4 BaZnTe2O7 + 6 Li -> BaTeO4 + Ba3Te4O11 + 3 Li2TeO3 + 4 ZnO	1.2 BaZnTe2O7 -> BaTeO4 + 0.4 Zn3TeO6 + TeO2 + 0.2 Ba	-0.40484713548131124	-0.20203983526414904	-0.1015719089893583
BaZr(BO3)2	1.095527070958302	3.744811569374926	3 BaZr(BO3)2 + 6.667 Li -> Li6B4O9 + 0.6667 BaLiBO3 + 2.333 BaZrO3 + 0.6667 ZrB2	2 BaZr(BO3)2 -> BaB4O7 + 0.5 O2 + 2 ZrO2 + Ba	-0.05920402543603931	-0.24368735157894506	-0.02774909512659196
BaZr(PO4)2	1.8577056883333065	4.09678791999996	2 BaZr(PO4)2 + 3.75 Li -> Ba2P2O7 + 1.25 Li3PO4 + 2 ZrO2 + 0.75 P	4 BaZr(PO4)2 -> BaZr4(PO4)6 + Ba2P2O7 + 0.5 O2 + Ba	-0.03832978315455904	-0.15062285378098705	-0.046726088888880746
BaZr(SiO3)3	1.1807471486458159	3.747813469999991	0.625 BaZr(SiO3)3 + 2 Li -> Li2SiO3 + 0.625 BaSiO3 + 0.375 ZrO2 + 0.25 ZrSi	BaZr(SiO3)3 -> ZrSiO4 + 2 SiO2 + 0.5 O2 + Ba	-0.04097256415626749	-0.22559095047131894	-0.022008787250034967
BaZr2F10	1.4187922820833534	6.325709656249982	BaZr2F10 + 1.333 Li -> BaZrF6 + 0.6667 Li2ZrF6 + 0.3333 Zr	BaZr2F10 -> BaZrF6 + 2 F2 + Zr	-0.055606454193035226	-0.057304153699999194	-0.08762638781481158
BaZr4(PO4)6	1.9665242811667136	4.529265384999642	BaZr4(PO4)6 + 1.25 Li -> BaZr(PO4)2 + 1.25 LiZr2(PO4)3 + 0.5 ZrO2 + 0.25 P	BaZr4(PO4)6 -> Zr2P2O9 + 2 ZrP2O7 + 0.5 O2 + Ba	-0.018918424044117366	-0.14394554979804375	-0.05794676541985355
BaZrF6	1.3422444527083042	6.245733614999935	3 BaZrF6 + 2 Li -> Li2ZrF6 + 1.5 Ba2ZrF8 + 0.5 Zr	2 BaZrF6 -> BaZr2F10 + F2 + Ba	-0.054443504375010665	-0.0803323523749988	-0.07441078649304655
BaZrN2	0.3027780233333388	0.90312693625	BaZrN2 + 2 Li -> Ba + Li2ZrN2	3 BaZrN2 -> Zr3N4 + BaN2 + 2 Ba	-0.3960295779687417	-0.6653693059482855	-0.897170289922407
BaZrO3	0.08979440854164689	3.352992707499988	2.375 BaZrO3 + 6 Li -> Li6Zr2O7 + 2.375 Ba + 0.125 Zr3O	BaZrO3 -> ZrO2 + 0.5 O2 + Ba	-0.157476727866376	-0.3574018480882364	-0.07924999243464281
BaZrS3	1.1576622933333691	2.2537793125000034	6 BaZrS3 + Li -> Li(ZrS2)2 + 2 Ba3Zr2S7	BaZrS3 -> ZrS3 + Ba	-0.0027294524999925684	-0.29673834749999894	-0.8029875269711535
Be(BH4)2	1.3826875655448667	1.5563519968749986	Be(BH4)2 + 1.444 Li -> BeH2 + 0.1111 Li(BH)6 + 1.333 LiBH4	0.5 Be(BH4)2 -> BH3 + 0.5 H2 + 0.5 Be	-0.06537670143518604	-0.17705066733012464	-0.96642005524692
Be(GaO2)2	2.0939985847222697	4.0233310933333355	2.667 Be(GaO2)2 + Li -> LiGa5O8 + 2.667 BeO + 0.3333 Ga	Be(GaO2)2 -> Ga2O3 + 0.5 O2 + Be	-0.21945938645834184	-0.2154421654569887	-0.03734691919872146
Be(H2N)2	0.6727618139583393	2.204133161250024	0.75 Be(H2N)2 + 2 Li -> LiH2N + LiH + 0.25 Be3N2	0.75 Be(H2N)2 -> H3N + 0.25 N2 + 0.75 Be	-0.0010841019521197204	-0.3507448374999851	-0.44690959030165045
Be(PN2)2	1.4154272421666467	2.714879713333335	0.6 Be(PN2)2 + Li -> LiPN2 + 0.2 Be3N2 + 0.2 P	1.5 Be(PN2)2 -> P3N5 + 0.5 N2 + 1.5 Be	0.0	-0.306485601130954	-0.7009007468100283
Be(PO3)2	2.3306135646666455	4.8902322974999946	1.4 Be(PO3)2 + 4 Li -> Li4P2O7 + 1.4 BeO + 0.8 P	Be(PO3)2 -> P2O5 + 0.5 O2 + Be	-0.02456073299342698	-0.13085659851851883	-0.12688143816177
Be2BHO4	1.6012672670833612	4.0952918623958325	Be2BHO4 + Li -> LiBO2 + 2 BeO + 0.5 H2	Be2BHO4 -> BHO2 + O2 + 2 Be	0.0	-0.1994262563888869	-0.004289757045453868
Be2BO3F	1.3742973220833044	4.223096415277774	13 Be2BO3F + 16 Li -> Li3B7O12 + B6O + 13 LiF + 26 BeO	2 Be2BO3F -> BeF2 + B2O3 + 1.5 O2 + 3 Be	0.0	-0.18282617746666086	-0.027921339591840955
Be2C	8.881784197001252e-16	1.2459415300000023	Li -> Li	Be2C -> C + 2 Be	-0.25910108440000057	-0.7603192392424238	-1.3144845930357163
Be2Co(NF7)2	5.880888495000002	6.299373292499991	Be2Co(NF7)2 + 4 Li -> CoF3 + 2 Li2BeF4 + 0.25 N2 + 1.5 NF2	Be2Co(NF7)2 -> CoF3 + 3.5 F2 + 2 NF2 + 2 Be	-0.8813748300989417	-6.902660132426942e-15	-0.6661427231183592
Be2GeO4	2.124498202083312	4.072504471666668	1.5 Be2GeO4 + 2 Li -> Li2GeO3 + 3 BeO + 0.5 Ge	Be2GeO4 -> O2 + GeO2 + 2 Be	-0.17387141170454168	-0.19754613149124678	-0.028796713444435795
Be2P2PbO8	2.045436816111148	4.379370984687504	14 Be2P2PbO8 + 63 Li -> P7Pb + 21 Li3PO4 + 28 BeO + 13 Pb	Be2P2PbO8 -> P2PbO6 + O2 + 2 Be	-0.02539383449999777	-0.14241170305107764	-0.06870521920045514
Be2SiO4	1.4075580195833008	4.022207482083337	1.5 Be2SiO4 + 2 Li -> Li2BeSiO4 + 2 BeO + 0.5 Si	Be2SiO4 -> SiO2 + O2 + 2 Be	0.0	-0.2171958921604933	-0.039661601271923086
Be2Te7Cl6	2.877163480833339	2.464060872343747	0.5 Be2Te7Cl6 + Li -> BeCl2 + LiCl + 3.5 Te	0.1818 Be2Te7Cl6 -> Te + 0.2727 TeCl4 + 0.3636 Be	-0.06985506491935567	-0.13945548450180967	-0.4764972595521163
Be2TlF5	2.1657279791667015	4.343869657916669	0.6667 Be2TlF5 + 0.6667 Li -> BeF2 + 0.3333 Li2BeF4 + 0.6667 Tl	Be2TlF5 -> TlF3 + BeF2 + Be	-0.07509167421874263	0.0	-0.1261415930092591
Be3Ag4P3BrO12	3.525253071666566	4.365258162500008	Be3Ag4P3BrO12 + 4 Li -> Li4Be3P3BrO12 + 4 Ag	Be3Ag4P3BrO12 -> AgBr + 3 AgO + 1.5 Be(PO3)2 + 1.5 Be	-0.1789220713861308	-0.13822172513153697	-0.09481261222459114
Be3Al2(SiO3)6	1.5794608623611235	4.033647593124994	1.5 Be3Al2(SiO3)6 + 3 Li -> LiAl(Si2O5)2 + 2 LiAlSiO4 + 2.25 Be2SiO4 + 0.75 Si	Be3Al2(SiO3)6 -> BeAl2O4 + 6 SiO2 + O2 + 2 Be	0.0	-0.20795152546218576	-0.044933291709956524
Be3As2(H2O5)2	3.3264543627083327	4.143599748365384	1.25 Be3As2(H2O5)2 + Li -> Be2AsH5O7 + LiAsO3 + 0.25 As2O3 + 1.75 BeO	1.667 Be3As2(H2O5)2 -> As3(HO2)5 + 0.3333 Be2AsH5O7 + 2.167 O2 + 4.333 Be	-0.2275069246230519	-0.15999938489437482	-0.0648406790988525
Be3Cd4Si3SO12	2.2509927333333266	3.1045431941666997	0.3333 Be3Cd4Si3SO12 + 2 Li -> Li2BeSiO4 + 0.3333 CdS + Cd	0.6667 Be3Cd4Si3SO12 -> Be2SiO4 + 0.5 CdSO4 + 0.1667 CdS + SiO2 + 2 Cd	-0.1718183731250349	-0.20349526141566243	-0.22081306279998802
Be3Cd4Si3SeO12	2.25499609583333	3.3575360610416594	0.3333 Be3Cd4Si3SeO12 + 2 Li -> Li2BeSiO4 + 0.3333 CdSe + Cd	Be3Cd4Si3SeO12 -> CdSeO3 + 1.5 Be2SiO4 + 1.5 SiO2 + 3 Cd	-0.17262969295258834	-0.20379905749999971	-0.14430999064000138
Be3Cd4Si3TeO12	2.268732750833343	3.187798391041653	0.3333 Be3Cd4Si3TeO12 + 2 Li -> Li2BeSiO4 + 0.3333 CdTe + Cd	0.6667 Be3Cd4Si3TeO12 -> Be2SiO4 + 0.6667 CdTeO3 + SiO2 + 2 Cd	-0.1752886026077931	-0.20477483436747002	-0.18654136057999793
Be3N2	0.0	1.9883882720833332	Li -> Li	Be3N2 -> N2 + 3 Be	-0.06524285769230831	-0.555556658650779	-0.805228693213635
Be3P2	1.1747734389583266	1.1216647675000004	0.5 Be3P2 + Li -> LiBeP + 0.5 Be	Be3P2 -> BeP2 + 2 Be	-0.2570614947177421	-0.5644456171467214	-1.4861635361998804
Be3P2(H2O5)2	2.133486413229135	4.222131109062501	2.333 Be3P2(H2O5)2 + 8 Li -> BeP2(HO)4 + 2.667 Li3PO4 + 6 BeO + 2.667 H2O	0.75 Be3P2(H2O5)2 -> PH3O4 + 0.25 Be(PO3)2 + O2 + 2 Be	-0.0005861103977258253	-0.1390407679225356	-0.06212287456395149
Be3Tl2Ni2F12	2.9250497481249838	4.137978171249954	0.5 Be3Tl2Ni2F12 + 2 Li -> Li2BeF4 + 0.5 BeTl2F4 + Ni	0.6667 Be3Tl2Ni2F12 -> Be2TlF5 + 0.3333 TlF3 + NiF2 + 0.3333 Ni	-0.198829187970476	-4.581718891534598e-15	-0.1200018140116259
Be3Zn4Si3SO12	1.925370529285707	3.0521689564583414	0.3333 Be3Zn4Si3SO12 + 2 Li -> Li2BeSiO4 + 0.3333 ZnS + Zn	Be3Zn4Si3SO12 -> Be2SiO4 + BeSO4 + 2 SiO2 + 4 Zn	-0.14151364305121028	-0.1932190427409579	-0.23959820856001368
Be4N6O19	3.976231696666634	4.324967975781262	0.3333 Be4N6O19 + Li -> LiNO3 + 1.333 BeO + NO2	0.1667 Be4N6O19 -> NO3 + 0.08333 O2 + 0.6667 Be	-0.6856328640094587	-0.1443461922783742	-0.09369126134433392
Be4Si2H2O9	1.8971488799999383	4.033257564687491	Be4Si2H2O9 + 2 Li -> Be2SiO4 + Li2BeSiO4 + BeO + H2	0.5 Be4Si2H2O9 -> SiO2 + O2 + 0.5 H2O + 2 Be	-0.0077002993530612684	-0.20531853696327396	-0.034892781890244695
Be4TeO7	3.057419773333308	4.101351579375002	3 Be4TeO7 + 4 Li -> Li2Te2O5 + Li2TeO4 + 12 BeO	Be4TeO7 -> TeO3 + 2 O2 + 4 Be	-0.2441679884615402	-0.20790354807095968	-0.040737609819645026
BeAgPO4	3.1717679024999907	4.325425961666676	4 BeAgPO4 + 4 Li -> Be(PO3)2 + Li4P2O7 + 3 BeO + 4 Ag	2 BeAgPO4 -> Be(PO3)2 + 2 AgO + Be	-0.11921991653017461	-0.1424757473117273	-0.09045688689023601
BeAl2O4	0.9105151066667392	4.082336368749991	2.667 BeAl2O4 + Li -> LiAl5O8 + 2.667 BeO + 0.3333 Al	BeAl2O4 -> Al2O3 + 0.5 O2 + Be	0.0	-0.28010195144927463	-0.022032113947374032
BeBr2	1.5728477983333375	3.1709549124999965	BeBr2 + 2 Li -> Be + 2 LiBr	0.5 BeBr2 -> Br + 0.5 Be	-0.0763058630000002	-0.2508666001190467	-0.5306383556578944
BeCN2	1.9204452220833357	1.9096212162500015	1.5 BeCN2 + 2 Li -> Li2CN2 + 0.5 Be3N2 + 0.5 C	BeCN2 -> N2 + C + Be	-0.02583996136904876	-0.4169311458254734	-0.6454266171754508
BeCl2	1.517647968333339	3.483200599999996	BeCl2 + 2 Li -> Be + 2 LiCl	BeCl2 -> Cl2 + Be	-0.06306371600000094	-0.23134270797619272	-0.3676505850735281
BeCr2O4	1.637943530000006	4.029161129999975	0.6667 BeCr2O4 + Li -> LiCrO2 + 0.6667 BeO + 0.3333 Cr	0.5 BeCr2O4 -> CrO2 + 0.5 Be	-1.462896000722223	-0.22160435962364744	-2.3555238660000013
BeF2	1.1234718158333266	6.087986510833334	2 BeF2 + 2 Li -> Li2BeF4 + Be	BeF2 -> F2 + Be	0.0	0.0	-0.09050405496211611
BeGeAs2	0.9014795108333382	1.3591419531250013	BeGeAs2 + 4 Li -> Li3As + LiBeAs + Ge	BeGeAs2 -> GeAs2 + Be	-0.13141568073908783	-0.3789182284179202	-0.9772828450561197
BeGeN2	0.6043699384895689	2.28972212375	BeGeN2 + 2.667 Li -> LiBeN + 0.3333 Li5GeN3 + 0.6667 Ge	3 BeGeN2 -> N2 + Ge3N4 + 3 Be	-0.07433715357639281	-0.3521027001934529	-0.6323148063581323
BeGeP2	0.8666972558333279	1.6094175408333353	BeGeP2 + 4 Li -> LiBeP + Li3P + Ge	0.5 BeGeP2 -> P + 0.5 Ge + 0.5 Be	-0.061128873670635464	-0.31579957081845267	-1.2238883087158876
BeH14(I2O9)2	3.749421137333306	4.166610726250025	BeH14(I2O9)2 + 1.667 Li -> BeH8(IO5)2 + 1.667 LiIO3 + 3 H2O + 0.3333 I	0.5 BeH14(I2O9)2 -> I2O5 + 3.5 H2O + 0.25 O2 + 0.5 Be	-0.4380977294101238	-0.14488993929344685	-0.07029505621082066
BeH2	0.9093521241666693	1.119747409166663	1.5 BeH2 + Li -> LiBeH3 + 0.5 Be	BeH2 -> H2 + Be	-0.17306143983840228	-0.44871354352666537	-1.0847594895068002
BeH2SeO4	3.0377603539973834	4.02770314625002	1.25 BeH2SeO4 + Li -> LiHSeO3 + 0.75 H2O + 1.25 BeO + 0.25 Se	4 BeH2SeO4 -> BeH8SeO8 + 2 BeO + 3 SeO2 + Be	-0.2899251042702127	-0.1523625721969717	-0.1268683580208294
BeH8(ClO2)2	2.141262498333335	4.204308398999997	0.3333 BeH8(ClO2)2 + 0.6667 Li -> H2O + 0.6667 LiCl + 0.3333 BeO + 0.3333 H2	1.25 BeH8(ClO2)2 -> H7ClO3 + H3ClO + 0.5 ClO2 + 1.25 Be	-0.061561067427537086	-0.10043087771241876	-0.07938082161637983
BeH8(IO5)2	3.57511029683332	4.1616148362500125	0.6 BeH8(IO5)2 + Li -> LiIO3 + 2.4 H2O + 0.6 BeO + 0.2 I	2 BeH8(IO5)2 -> BeH14(I2O9)2 + H2O + 0.5 O2 + Be	-0.39722994897161445	-0.14701050931282045	-0.06502758271857267
BeH8(NF2)2	1.9905008725000535	3.4022875073611036	BeH8(NF2)2 + Li -> H4NF + 0.5 Li2BeF4 + 0.5 BeH6(NF)2 + 0.5 H2	0.625 BeH8(NF2)2 -> H5NF2 + 0.25 BeF2 + 0.125 N2 + 0.375 Be	0.0	-0.08334193103681775	-0.2854940591693198
BeH8(NO5)2	3.541282159333296	4.171169806250009	0.6 BeH8(NO5)2 + Li -> LiNO3 + 2.4 H2O + 0.6 BeO + 0.1 N2	0.5 BeH8(NO5)2 -> H3NO4 + 0.5 H2O + 0.25 O2 + 0.5 Be	-0.4049813250685945	-0.09749850490496259	-0.03750541234848459
BeH8SO8	2.8265774817333256	3.4496102080208413	16 BeH8SO8 + 25 Li -> LiS4 + 12 Li2SO4 + 64 H2O + 16 BeO	0.25 BeH8SO8 -> H2O + 0.25 BeO + 0.375 O2 + 0.25 S	-0.09952421078794726	-0.10135008639639587	-0.04294587141665929
BeH8SeO8	3.52388614416658	4.405404920000025	2 BeH8SeO8 + 2 Li -> BeH2SeO4 + Li2SeO4 + 7 H2O + BeO	3 BeH8SeO8 -> H4SeO5 + 2 H10SeO8 + 1.5 O2 + 3 Be	-0.24966016090773646	-0.10781847993701077	-0.03864700886110617
BeI2	1.6002271908333379	2.3164215374999975	BeI2 + 2 Li -> Be + 2 LiI	0.5 BeI2 -> I + 0.5 Be	-0.08501829881356016	-0.30080451119047513	-0.7083576346052607
BeO	0.0	4.016355802499996	Li -> Li	2 BeO -> O2 + 2 Be	-1.655161926961135e-15	-0.2544825347222215	-1.4089659802762889e-14
BeP2	0.9196816977083397	1.5532456177083338	BeP2 + 2 Li -> LiBeP + LiP	0.5 BeP2 -> P + 0.5 Be	-0.08999166861750751	-0.37430256454394506	-1.2886427630850996
BePH4NO4	1.8445825990617215	3.1856634375000255	9 BePH4NO4 + 11.69 Li -> P3H30N7O12 + 0.2222 Li2P7(H3N)9 + 3.75 Li3PO4 + 9 BeO + 0.6944 P	1.667 BePH4NO4 -> PH6NO4 + 0.1667 Be3P2(H2O5)2 + 0.1667 Be(PO3)2 + 0.3333 N2 + Be	-2.8637628627067617e-15	-0.13083872965447552	-0.24771496174156793
BeS	0.9474409458333355	2.3802062240624977	BeS + 2 Li -> Li2S + Be	BeS -> S + Be	0.0	-0.36967780430555064	-0.915270700530302
BeSO4	3.021390438533331	3.3988776671875005	16 BeSO4 + 25 Li -> LiS4 + 12 Li2SO4 + 16 BeO	BeSO4 -> BeO + 1.5 O2 + S	-0.2215520817812573	-0.10624239194444529	-0.09658205610118209
BeSe	1.097303415833336	2.1013878636718712	BeSe + 2 Li -> Be + Li2Se	BeSe -> Se + Be	-0.028665738669084284	-0.3327216733332641	-0.952031427916666
BeSiAs2	0.8650200695833388	1.3870374650000046	BeSiAs2 + 4 Li -> Li3As + LiBeAs + Si	BeSiAs2 -> SiAs2 + Be	-0.1281337847222228	-0.4048616371527778	-1.3112269323656445
BeSiN2	0.2089133848903364	2.259756102083329	1.5 BeSiN2 + 3.167 Li -> Li2SiN2 + 0.1667 Li7Si3 + 0.5 Be3N2	3 BeSiN2 -> Si3N4 + N2 + 3 Be	0.0	-0.4464465933333337	-0.7409012459338085
BeSiP2	0.7626786933333205	1.6316805900000022	3 BeSiP2 + 8 Li -> Li5SiP3 + 3 LiBeP + 2 Si	BeSiP2 -> SiP2 + Be	-0.06381026327730899	-0.3765559541319452	-1.3786644201905867
BeSnAs2	0.9287138490476154	1.3432667956250017	4 BeSnAs2 + 7 Li -> Sn4As3 + Li3As + 4 LiBeAs	4 BeSnAs2 -> Sn4As3 + 5 As + 4 Be	-0.13571353577380973	-0.37724177685541704	-0.958785567576611
BeTe	1.1967465058333353	1.6423644225000014	BeTe + 2 Li -> Li2Te + Be	BeTe -> Te + Be	-0.17218296055803584	-0.47822106309888945	-1.146708232333332
BeTl2F4	2.3064615529166765	4.379692841249958	BeTl2F4 + 2 Li -> Li2BeF4 + 2 Tl	BeTl2F4 -> TlF3 + TlF + Be	-0.15277118749998841	-2.106874975276491e-15	-0.16162556521738347
Bi(BO2)3	2.5346230849999616	4.7153266858332845	4 Bi(BO2)3 + 3 Li -> Bi3B5O12 + Li3B7O12 + Bi	2.667 Bi(BO2)3 -> Bi2B8O15 + 0.5 O2 + 0.6667 Bi	-0.1369651756971031	-0.2012265256521637	-0.04784520659090452
Bi(IO3)3	3.6188291108333512	4.90519948375	2 Bi(IO3)3 + 1.667 Li -> Bi2I4O13 + 1.667 LiIO3 + 0.3333 I	0.6667 Bi(IO3)3 -> I2O5 + 0.5 O2 + 0.6667 Bi	-0.7510915777238836	-0.1687009354925355	-0.07946409133560928
Bi(Mo2Cl5)3	2.399233287500003	3.9607801724998235	0.3333 Bi(Mo2Cl5)3 + Li -> LiCl + 0.3333 Bi + 2 MoCl2	Bi(Mo2Cl5)3 -> MoCl5 + 5 MoCl2 + Bi	-0.2601322273990663	-0.0410744267897718	-0.4446534860683342
Bi(PO3)3	3.247934856166569	5.264978216666334	2.2 Bi(PO3)3 + Li -> LiBi(PO3)4 + 0.6 Bi2P4O13 + 0.2 P	1.667 Bi(PO3)3 -> BiP5O14 + 0.5 O2 + 0.6667 Bi	-0.12191221204748093	-0.13654600735074407	-0.14753335327381656
Bi(W2Cl5)3	2.5557673206249962	3.673839417916617	Bi(W2Cl5)3 + 12 Li -> BiCl3 + 12 LiCl + 6 W	0.6667 Bi(W2Cl5)3 -> WCl4 + 3 WCl2 + 0.6667 Bi	-0.32053477859471835	-0.00886313387499893	-0.5304675431428634
Bi10(MoO8)3	2.3709516354166613	4.590002101041607	1.4 Bi10(MoO8)3 + 3.2 Li -> Bi14MoO24 + 1.6 Li2MoO4 + 1.6 MoO2	1.167 Bi10(MoO8)3 -> Bi4O7 + 3.5 Bi2MoO6 + 0.6667 Bi	-0.4134109306744107	-0.24047768599224595	-0.03985417091788834
Bi13Mo6(AsO14)3	2.7053649353372258	3.680071862500018	0.7692 Bi13Mo6(AsO14)3 + 1.938 Li -> Bi10(MoO8)3 + 0.6462 Li3AsO4 + 1.615 MoO2 + 0.8308 As2O3	Bi13Mo6(AsO14)3 -> Bi7Mo2(AsO8)3 + 2.5 Bi2MoO6 + 1.5 MoO2 + Bi	-0.4082675647443126	-0.21240339439901978	-0.09938039649172126
Bi14MoO24	2.2799676479166155	4.309296085416591	2 Bi14MoO24 + 2 Li -> Li2MoO4 + 14 Bi2O3 + MoO2	0.4375 Bi14MoO24 -> Bi4O7 + 0.1458 Bi10(MoO8)3 + 0.6667 Bi	-0.40367389375241514	-0.2904386491361759	-0.04384114499037395
Bi14SO24	2.2469841314582126	4.491368518589742	5 Bi14SO24 + 8 Li -> Bi2SO2 + 34 Bi2O3 + 4 Li2SO4	0.359 Bi14SO24 -> Bi4O7 + 0.1795 Bi2S2O9 + 0.6667 Bi	-0.369764027935517	-0.285408097601624	-0.04331563650287773
Bi15AsO25	2.6160895097915784	4.307004085416667	0.1333 Bi15AsO25 + 0.16 Li -> Bi2O3 + 0.04 As2O3 + 0.05333 Li3AsO4	0.3333 Bi15AsO25 -> Bi4O7 + 0.3333 BiAsO4 + 0.6667 Bi	-0.39261769070679176	-0.2930098556799887	-0.05601311375000151
Bi2(MoO4)3	3.3022986654166306	4.7157230156250245	Bi2(MoO4)3 + Li -> Bi2Mo2O9 + 0.5 Li2MoO4 + 0.5 MoO2	0.3333 Bi2(MoO4)3 -> MoO3 + 0.5 O2 + 0.6667 Bi	-0.48318591398213817	-0.18217895271126827	-0.07181073563007478
Bi2(S2O7)3	4.025139034583296	3.217915944965283	Bi2(S2O7)3 + 2 Li -> Li2S2O7 + Bi2(SO4)3 + SO2	Bi2(S2O7)3 -> Bi2(SO4)3 + 4.5 O2 + 3 S	-0.33169041066310845	-0.1047831148905114	-0.15482634714161048
Bi2(SO4)3	3.111281010833352	3.3946615405208367	1.083 Bi2(SO4)3 + 2 Li -> Bi2S2O9 + Li2SO4 + 0.08333 Bi2S3	Bi2(SO4)3 -> Bi2S2O9 + 1.5 O2 + S	-0.2905791130652404	-0.10764067710674285	-0.1051277097561023
Bi24Cl10O31	2.263141769333383	4.433777295000002	0.2 Bi24Cl10O31 + Li -> LiBi3(ClO2)2 + 0.7333 Bi2O3 + 0.3333 Bi	0.3333 Bi24Cl10O31 -> Bi4O7 + 3.333 BiClO + 0.6667 Bi	-0.3213268066584689	-0.25657457933421757	-0.056448033116403895
Bi2Au5F21	4.961708988666669	5.568188824166667	0.2667 Bi2Au5F21 + Li -> LiAuF4 + 0.5333 BiF3 + 0.3333 Au	0.5 Bi2Au5F21 -> BiF5 + 1.1 AuF5 + 1.4 Au	-0.6100531527361359	0.0	-0.32080697246093637
Bi2B8O15	2.6746500758334264	4.807415234722251	0.5714 Bi2B8O15 + 0.4286 Li -> Bi(BO2)3 + 0.1429 Li3B11O18 + 0.1429 Bi	0.25 Bi2B8O15 -> B2O3 + 0.375 O2 + 0.5 Bi	-0.11429530490128759	-0.1982315606739118	-0.0520077784183659
Bi2CO5	2.342537582083305	4.6841147045833305	Bi2CO5 + 2 Li -> Li2CO3 + 0.6667 Bi2O3 + 0.6667 Bi	Bi2CO5 -> CO2 + 1.5 O2 + 2 Bi	-0.303611945530752	-0.22594526519231106	-0.04948448677084283
Bi2H18C3(IN)9	1.8358132622222183	3.851030038333371	0.1667 Bi2H18C3(IN)9 + 1.5 Li -> LiH3IN + 0.25 Li2CN2 + 0.1667 BiI3 + 0.25 C + 0.1667 Bi	0.8889 Bi2H18C3(IN)9 -> IN4 + BiI3 + 4 H4IN + 2.667 C + 0.7778 Bi	0.0	-0.13766240401175467	-0.34670849593975683
Bi2Mo2O9	3.2176545454166323	4.702370249999999	Bi2Mo2O9 + Li -> Bi2MoO6 + 0.5 Li2MoO4 + 0.5 MoO2	1.5 Bi2Mo2O9 -> Bi2(MoO4)3 + 0.75 O2 + Bi	-0.4611910155169765	-0.19170729286363564	-0.06789236743294635
Bi2MoO6	2.7719602291666927	4.674155543333332	5 Bi2MoO6 + 2 Li -> Bi10(MoO8)3 + Li2MoO4 + MoO2	2 Bi2MoO6 -> Bi2Mo2O9 + 1.5 O2 + 2 Bi	-0.426210803084921	-0.2157724365278133	-0.04595016921109352
Bi2O3	1.8958343358333205	4.294132087500013	0.6667 Bi2O3 + Li -> LiBiO2 + 0.3333 Bi	2.333 Bi2O3 -> Bi4O7 + 0.6667 Bi	-0.400185791193195	-0.30905972249997826	-0.04688763068966084
Bi2P4O13	2.88846176966657	5.116927326666631	1.6 Bi2P4O13 + Li -> LiBi(PO3)4 + 2.2 BiPO4 + 0.2 P	0.75 Bi2P4O13 -> Bi(PO3)3 + 0.375 O2 + 0.5 Bi	-0.1227006059143001	-0.1370294686855662	-0.11478269998894275
Bi2Pt2O7	2.659376245208332	4.309785513333322	0.75 Bi2Pt2O7 + 2 Li -> Li2PtO3 + 0.75 Bi2O3 + 0.5 Pt	1.667 Bi2Pt2O7 -> Bi3Pt3O11 + 0.3333 PtO2 + 0.3333 Bi	-0.5840491286250149	-0.19865977698275694	-0.024578677353281897
Bi2S2O	1.8336913395833623	3.584388961562499	4 Bi2S2O + 2 Li -> Li2SO4 + 2.333 Bi2S3 + 3.333 Bi	9 Bi2S2O -> Bi2S2O9 + 5.333 Bi2S3 + 5.333 Bi	-0.19196139562500614	-0.18985696204545421	-0.5932483323508562
Bi2S2O9	2.9654882732852563	3.435573701354171	2.615 Bi2S2O9 + 8 Li -> Bi2SO2 + 0.2308 Bi14SO24 + 4 Li2SO4	0.5 Bi2S2O9 -> BiO2 + 1.25 O2 + S	-0.2960746892371868	-0.14339884177417783	-0.10054057594826782
Bi2S3	1.800372703333323	3.7191774300000047	0.6667 Bi2S3 + Li -> LiBiS2 + 0.3333 Bi	0.6667 Bi2S3 -> BiS2 + 0.3333 Bi	-1.0609544410788988e-15	-0.09088912367646529	-0.6479312837902581
Bi2SO2	1.9487901987499958	3.5515035732291724	3.5 Bi2SO2 + 3 Li -> Bi2S2O + 1.5 Li2SO4 + 5 Bi	3.2 Bi2SO2 -> Bi2S2O + 0.6 Bi2S2O9 + 3.2 Bi	-0.3095747056944531	-0.2577614836538453	-0.4787671877937427
Bi2Se4Cl7	3.0045995986904765	4.207127620983076	0.5 Bi2Se4Cl7 + 3.5 Li -> BiSe2 + 3.5 LiCl	0.5714 Bi2Se4Cl7 -> SeCl4 + 1.286 Se + 1.143 Bi	-0.11500836053904151	-0.009222069035938585	-0.33231729041666536
Bi2SeO5	2.2998405416666863	4.633249572499977	2.5 Bi2SeO5 + 3 Li -> Bi2SeO2 + 1.5 Li2SeO4 + 1.5 Bi2O3	4.2 Bi2SeO5 -> Bi4O7 + 1.4 Bi2Se3O10 + 1.6 Bi	-0.4002104514988414	-0.21792945437499056	-0.08252659427086195
Bi2Te2O7	2.6562325197916747	3.997091199375031	1.1 Bi2Te2O7 + 1.8 Li -> Bi2TeO5 + 0.9 Li2TeO3 + 0.1 Bi2Te3	5 Bi2Te2O7 -> Bi2Te4O11 + 6 BiTeO4 + 2 Bi	-0.35486128052708565	-0.22407674251177645	-0.15043870183225527
Bi2Te2Se	1.5316112133333366	3.7243108883333362	3 Bi2Te2Se + 6 Li -> Bi4Te3 + Bi2Te3 + 3 Li2Se	2 Bi2Te2Se -> Bi2Te3 + TeSe2 + 2 Bi	0.0	-0.03133445413793112	-0.4966892628947359
Bi2Te4O11	2.7345805310069036	4.06241777541672	1.118 Bi2Te4O11 + 2.118 Li -> Bi2Te2O7 + 1.059 Li2Te2O5 + 0.1176 Bi2Te3	0.6667 Bi2Te4O11 -> BiTeO4 + 1.667 TeO2 + 0.3333 Bi	-0.35502070444963385	-0.21306014231927795	-0.18505368476638617
Bi2Te7Cl8	2.8776410733333333	3.8532050770833255	0.5 Bi2Te7Cl8 + 3 Li -> BiTeCl + 3 LiCl + 2.5 Te	0.2 Bi2Te7Cl8 -> Te + 0.4 TeCl4 + 0.4 Bi	-0.10440943138424807	-0.013082226788793339	-0.41256283270452976
Bi2TeO2	1.948697097916675	3.589028786250004	0.8571 Bi2TeO2 + 1.714 Li + 0.2143 Li6TeO6 -> Li3BiO3 + 0.3571 Bi2Te3	2.5 Bi2TeO2 -> Bi2TeO5 + 0.5 Bi2Te3 + 2 Bi	-0.3242788875000029	-0.26455661320512824	-0.35643945171052827
Bi2TeO5	2.451296661249991	4.041530375833316	4 Bi2TeO5 + 6 Li -> Bi2TeO2 + 3 Li2TeO3 + 3 Bi2O3	2 Bi2TeO5 -> BiTeO4 + Bi2TeO6 + Bi	-0.35916554721917615	-0.24484264755208995	-0.11731896266670327
Bi2TeO6	2.9775312770833553	4.720422904999998	1.5 Bi2TeO6 + 2 Li -> Bi2TeO5 + 0.5 Li4TeO5 + 0.5 Bi2O3	Bi2TeO6 -> TeO3 + 1.5 O2 + 2 Bi	-0.41003094769469817	-0.21347475977775954	-0.051889493355272265
Bi2W2O9	2.53012451833329	4.670705556250003	Bi2W2O9 + Li -> Bi2WO6 + 0.5 Li2WO4 + 0.5 WO2	0.5 Bi2W2O9 -> WO3 + 0.75 O2 + Bi	-0.4161434272471767	-0.19713911454545463	-0.04265028612063215
Bi2WO6	2.165020470833345	4.664690323749996	1.5 Bi2WO6 + 3 Li -> Bi2O3 + 1.5 Li2WO4 + Bi	2 Bi2WO6 -> Bi2W2O9 + 1.5 O2 + 2 Bi	-0.3964652432315745	-0.22139048064814748	-0.03239525719998593
Bi3B5O12	2.490884345000037	4.726111428333265	0.375 Bi3B5O12 + 0.375 Li -> BiBO3 + 0.125 Li3B7O12 + 0.125 Bi	0.6 Bi3B5O12 -> Bi(BO2)3 + 0.6 BiO2 + 0.2 Bi	-0.19486201262929725	-0.21440701892361025	-0.04118906453122806
Bi3BrO4	2.112071083333296	4.443270949166708	2 Bi3BrO4 + Li -> LiBi3(BrO2)2 + 1.333 Bi2O3 + 0.3333 Bi	2 Bi3BrO4 -> Bi4Br2O5 + 0.4286 Bi4O7 + 0.2857 Bi	-0.33503675312499936	-0.26959811423610747	-0.0338727476470726
Bi3PO7	2.449502311666656	4.534148245000064	Bi3PO7 + 3 Li -> Bi2O3 + Li3PO4 + Bi	2.333 Bi3PO7 -> Bi4O7 + 2.333 BiPO4 + 0.6667 Bi	-0.2698848599812327	-0.22731405111904657	-0.06543348985507746
Bi4Au2O9	2.8622451666666864	4.5722380731250185	0.6667 Bi4Au2O9 + Li -> LiAuO2 + 1.333 Bi2O3 + 0.3333 Au	0.5833 Bi4Au2O9 -> Bi2AuO5 + 0.08333 Au2O3 + 0.3333 Bi	-0.5110426608261478	-0.247792077147436	-0.06941035346492042
Bi4B2O9	2.2106062258332733	4.510357172916706	Bi4B2O9 + 3 Li -> Li3Bi(BO3)2 + Bi2O3 + Bi	2.333 Bi4B2O9 -> Bi4O7 + 4.667 BiBO3 + 0.6667 Bi	-0.3000003787731491	-0.2569843127777749	-0.034926302717384505
Bi4BPO10	2.444317689583314	4.650431600000031	2 Bi4BPO10 + 6 Li -> Bi4B2O9 + Bi2O3 + 2 Li3PO4 + 2 Bi	Bi4BPO10 -> BiBO3 + 1.5 BiO2 + BiPO4 + 0.5 Bi	-0.2628752450446412	-0.22753754685096705	-0.0568973489731226
Bi4Br2O5	2.2825154966666745	4.532493684166675	2 Bi4Br2O5 + 1.5 Li -> Bi3BrO4 + 1.5 LiBi3(BrO2)2 + 0.5 Bi	2.333 Bi4Br2O5 -> Bi4O7 + 4.667 BiBrO + 0.6667 Bi	-0.30700158020833035	-0.2521730491397811	-0.03009456804054378
Bi4I2O5	2.098026485833338	4.185673658750004	Bi4I2O5 + Li -> LiBi3(IO2)2 + 0.3333 Bi2O3 + 0.3333 Bi	Bi4I2O5 -> BiIO4 + BiIO + 2 Bi	-0.31508579139881476	-0.25898989040322973	-0.17765110523977934
Bi4O7	2.9545034324999904	4.637131113333353	2.5 Bi4O7 + 3 Li -> Li3BiO4 + 4.5 Bi2O3	0.2857 Bi4O7 -> BiO2 + 0.1429 Bi	-0.4612265530615991	-0.27506219946428634	-0.07823647797301847
Bi5NO10	2.778563941333311	4.770697886527776	1.2 Bi5NO10 + Li -> LiNO3 + 3 Bi2O3 + 0.1 N2	Bi5NO10 -> NO3 + 3.5 BiO2 + 1.5 Bi	-0.4444252101080379	-0.26866662978260747	-0.0547631803373847
Bi6Cl3O7F	2.2971672577777897	4.667036291666653	11 Bi6Cl3O7F + 22.5 Li -> Bi24Cl10O31 + 11.5 LiBi3(ClO2)2 + 11 LiF + 7.5 Bi	0.3333 Bi6Cl3O7F -> BiClO + 0.5 BiO2 + 0.3333 BiOF + 0.1667 Bi	-0.2846668642285075	-0.22801171686441002	-0.05891926839108963
Bi6P4PbO20	2.464113845000006	4.5563069775001805	Bi6P4PbO20 + 6 Li -> BiPPbO5 + Bi3PO7 + 2 Li3PO4 + 2 Bi	2 Bi6P4PbO20 -> Bi4O7 + 0.5 PbO2 + 8 BiPO4 + 1.5 Pb	-0.19461547598925133	-0.18339715348101437	-0.07393565902954169
Bi7Mo2(AsO8)3	2.8105223593750246	4.68420617375001	4.5 Bi7Mo2(AsO8)3 + 6 Li -> Bi10(MoO8)3 + Bi13Mo6(AsO14)3 + 8.5 BiAsO4 + 2 Li3AsO4	Bi7Mo2(AsO8)3 -> Bi2Mo2O9 + 3 BiAsO4 + 1.5 O2 + 2 Bi	-0.3904348296255047	-0.18968937593225244	-0.06639288107636121
Bi7O5F11	2.5701520741666695	4.695097444500009	0.2 Bi7O5F11 + 1.2 Li -> BiOF + 1.2 LiF + 0.4 Bi	0.2727 Bi7O5F11 -> BiF3 + 0.6818 O2 + 0.9091 Bi	-0.22984326921234555	-0.1828855540566412	-0.08306233014925324
BiAsO4	2.6850466414880323	4.901087343749999	15 BiAsO4 + 16.8 Li -> Bi15AsO25 + 4.2 As2O3 + 5.6 Li3AsO4	2 BiAsO4 -> As2O5 + 1.5 O2 + 2 Bi	-0.3559291413557877	-0.16675074766657882	-0.07200908555553598
BiAuCl6	3.1781697583333295	4.994491079166666	BiAuCl6 + 3 Li -> BiCl3 + 3 LiCl + Au	BiAuCl6 -> AuCl3 + 1.5 Cl2 + Bi	-0.1913505490624987	0.0	-0.09959280647499952
BiB2O4F	4.057710789696966	4.81573440249998	0.6471 Li + 0.2353 Bi7O5F11 + 0.4118 O2 -> BiO2 + 0.6471 LiBiF4	3 BiB2O4F -> BiF3 + 3 B2O3 + 1.5 O2 + 2 Bi	-0.15313652521590537	-0.1908887509635353	-0.06383781283543222
BiBO3	2.3307606324999908	4.671438003333319	4.333 BiBO3 + Li -> Bi4B2O9 + 0.3333 Li3B7O12 + 0.3333 Bi	5 BiBO3 -> Bi3B5O12 + 1.5 BiO2 + 0.5 Bi	-0.24268736367188737	-0.22870110013157285	-0.03662866326916436
BiBPbO4	2.0921239577083055	4.173073712500024	2 BiBPbO4 + 3 Li -> Li3Bi(BO3)2 + Bi + 2 PbO	2 BiBPbO4 -> PbO2 + 2 BiBO3 + Pb	-0.2863901114236409	-0.25847034303920635	-0.06050013428573031
BiBr3	2.1088919866666664	4.910910724166665	BiBr3 + 3 Li -> Bi + 3 LiBr	0.3333 BiBr3 -> Br + 0.3333 Bi	-0.048267865416658284	0.0	-0.09301421849999936
BiBrO	1.9758070833333115	4.778352517604172	4 BiBrO + 3 Li -> LiBi3(BrO2)2 + 2 LiBr + Bi	3 BiBrO -> Br2O3 + 0.3333 BiBr3 + 2.667 Bi	-0.224923907375004	-0.2049196176851833	-0.021859202749992424
BiCl3	2.41796683	4.858881738333332	BiCl3 + 3 Li -> Bi + 3 LiCl	0.6667 BiCl3 -> Cl2 + 0.6667 Bi	-0.125562685	-0.02597129499999884	-0.13944517974264725
BiClO	2.0921182116666417	4.799997007583336	4 BiClO + 3 Li -> LiBi3(ClO2)2 + 2 LiCl + Bi	2 BiClO -> ClO2 + 0.3333 BiCl3 + 1.667 Bi	-0.21664139537500304	-0.19064044296296578	-0.06105935379747285
BiF3	2.7646132733333157	6.2221913349999864	1.333 BiF3 + Li -> LiBiF4 + 0.3333 Bi	1.667 BiF3 -> BiF5 + 0.6667 Bi	-0.17781755104166996	0.0	-0.10069433031250385
BiF5	6.313163568333332	6.830861305833345	1.5 BiF5 + Li -> LiBiF6 + 0.5 BiF3	LiBiF6 -> BiF5 + 0.5 F2 + Li	-0.6420659445689716	0.0	-0.37282144875000833
BiI3	1.8227995050000008	4.369849223333333	BiI3 + 3 Li -> Bi + 3 LiI	0.3333 BiI3 -> I + 0.3333 Bi	2.883960913135919e-16	0.0	-0.240270018110436
BiIO	1.8310887699999434	4.271286509166674	6 BiIO + 1.5 Li -> BiI3 + 1.5 LiBi3(IO2)2 + 0.5 Bi	4 BiIO -> BiIO4 + BiI3 + 2 Bi	-0.24411833387500037	-0.21944557583333557	-0.20741275133534443
BiIO4	3.153373408269239	4.688454451666676	12 BiIO4 + 26 Li -> LiIO3 + 3 Bi4I2O5 + 5 Li5IO6	4 BiIO4 -> Bi2I4O13 + 1.5 O2 + 2 Bi	-0.6439556080859345	-0.18970289187499834	-0.07361825583332404
BiO2	3.5412527670833676	3.7905709290476244	5 BiO2 + Li -> Bi4O7 + LiBiO3	8 LiBiO3 -> LiO8 + 8 BiO2 + 7 Li	-0.5416805151909716	-0.2596267385416633	-0.0935500120000301
BiOF	2.420234918333292	4.740965981666733	3 BiOF + 3 Li -> Bi2O3 + 3 LiF + Bi	11 BiOF -> Bi7O5F11 + 3 BiO2 + Bi	-0.2828591871176349	-0.21906563111113897	-0.0628641252380957
BiP3(PbO4)3	2.5651558933332765	4.743333927499999	0.3333 BiP3(PbO4)3 + Li -> LiPPbO4 + 0.3333 Bi	BiP3(PbO4)3 -> P2Pb2O7 + 0.5 PbO2 + BiPO4 + 0.5 Pb	-0.14575927800165145	-0.15550153923507404	-0.09571082482842508
BiP4HO12	3.0595935898667252	5.554194403888866	8.25 BiP4HO12 + 6.25 Li -> Bi2P4O13 + 6.25 LiBi(PO3)4 + 2.75 PH3O4 + 1.25 P	3 BiP4HO12 -> PH3O4 + 5.5 P2O5 + 2.25 O2 + 3 Bi	-0.10512890500494798	-0.13211587053977314	-0.1491160298541656
BiP5O14	3.296634810566716	5.5496442124999765	BiP5O14 + 1.667 Li -> LiBi(PO3)4 + 0.6667 LiPO3 + 0.3333 P	0.4 BiP5O14 -> P2O5 + 0.3 O2 + 0.4 Bi	-0.12532994402224062	-0.13892817651442368	-0.18486759173612732
BiPO4	2.518078356666684	5.007996088333341	BiPO4 + 3 Li -> Li3PO4 + Bi	4 BiPO4 -> Bi2P4O13 + 1.5 O2 + 2 Bi	-0.13045617464564874	-0.14358223641666723	-0.07148368374999459
BiPPbO5	2.4459898983333956	4.216290900000047	BiPPbO5 + Li -> LiPPbO4 + 0.3333 Bi2O3 + 0.3333 Bi	6 BiPPbO5 -> Bi6P4PbO20 + PbO2 + P2Pb3O8 + Pb	-0.19734910094126512	-0.18934159187500121	-0.08866183758333168
BiPS4	2.0224466565000014	3.797606343333339	1.6 BiPS4 + 3 Li -> Li3PS4 + 0.8 Bi2S3 + 0.6 P	4 BiPS4 -> BiS2 + 2 P2S7 + 3 Bi	-7.836452443991486e-15	-0.07208068090909148	-0.8248293004583327
BiPbBrO2	1.7062115286666608	4.239777192499991	3 BiPbBrO2 + 5 Li -> Pb3(BrO)2 + 1.333 Li3BiO3 + LiBr + 1.667 Bi	2 BiPbBrO2 -> PbO2 + 2 BiBrO + Pb	-0.2932547236574119	-0.2543597182692241	-0.04571523586206849
BiPbClO2	1.7120758111979106	4.276683072499992	3 BiPbClO2 + 6 Li -> Li3BiO3 + 3 PbO + 3 LiCl + 2 Bi	2 BiPbClO2 -> PbO2 + 2 BiClO + Pb	-0.2888008864350078	-0.25410990750000106	-0.06082571106057788
BiPbIO2	1.7248116850000124	3.975912843333325	4 BiPbIO2 + 6 Li -> Pb3(IO)2 + 2 Li3BiO3 + PbI2 + 2 Bi	3 BiPbIO2 -> BiIO4 + 2 BiIO + 3 Pb	-0.30820059546294987	-0.26205691519231067	-0.17853069695623724
BiS2	2.1715501333333385	3.939791285416666	BiS2 + Li -> LiBiS2	0.5 BiS2 -> S + 0.5 Bi	-4.221572968976517e-15	-0.05801815977430502	-0.6654656842078752
BiSBr	2.0843384458333194	3.768284511666683	BiSBr + Li -> LiBr + 0.3333 Bi2S3 + 0.3333 Bi	3 BiSBr -> BiBr3 + 1.5 BiS2 + 0.5 Bi	-0.029736971176465676	-0.07029804238095538	-0.5839128856382898
BiSCl	2.306958843333323	3.940141814895837	3 BiSCl + 3 Li -> Bi2S3 + 3 LiCl + Bi	3 BiSCl -> BiCl3 + 3 S + 2 Bi	-0.06903949558823452	-0.05781035809523738	-0.5874106543617066
BiSeCl	2.368267561666662	3.8919428708333434	3 BiSeCl + 3 Li -> Bi2Se3 + 3 LiCl + Bi	2 BiSeCl -> BiSe2 + 0.6667 BiCl3 + 0.3333 Bi	-0.07987352029411876	-0.015894519053308298	-0.38404137121795556
BiSeClO3	2.8658973627473125	4.53291655433597	2.333 BiSeClO3 + 1.333 Li -> BiClO + 0.6667 Bi2(SeO3)3 + 1.333 LiCl + 0.3333 Se	7 BiSeClO3 -> BiClO + 2 Bi2Se3O10 + 2 BiCl3 + Se	-0.3813137556764632	-0.16087809836538303	-0.1459943768452292
BiTeBr	2.0239110333333317	3.7996012666666665	6 BiTeBr + 6 Li -> Bi4Te3 + Bi2Te3 + 6 LiBr	3 BiTeBr -> BiBr3 + 3 Te + 2 Bi	-0.01802379338235549	-0.026734323777774294	-0.4452578707286876
BiTeCl	2.265124678333332	3.8249126583333344	6 BiTeCl + 6 Li -> Bi4Te3 + Bi2Te3 + 6 LiCl	8 BiTeCl -> Bi2Te7Cl8 + Te + 6 Bi	-0.06059537808823423	-0.024630365735293758	-0.45140938575112455
BiTeI	1.7515804233333334	3.7927203308333333	6 BiTeI + 6 Li -> Bi4Te3 + Bi2Te3 + 6 LiI	3 BiTeI -> BiI3 + 3 Te + 2 Bi	0.0	-0.027456636333333617	-0.43289161285872624
BiTeNO6	3.663862903333283	4.724716582499987	BiTeNO6 + 0.6667 Li -> BiTeO4 + 0.6667 LiNO3 + 0.1667 N2	1.5 BiTeNO6 -> TeO3 + 0.5 Bi2TeO6 + 1.5 NO2 + 0.5 Bi	-0.4902891782932617	-0.1835103847222208	-0.12498209097307367
CO2	2.7625766708333437	3.9316696708333336	1.5 CO2 + 2 Li -> Li2CO3 + 0.5 C	Li2CO3 -> CO2 + 0.5 O2 + 2 Li	-0.2602782178826506	-0.07576057657404556	-0.11686758786765061
Ca(AgO2)2	2.7298552183333324	3.7261069475000093	Ca(AgO2)2 + 4 Li -> Li2O + 2 LiAgO + CaO	1.5 Ca(AgO2)2 -> Ag3O4 + O2 + 1.5 Ca	-0.819254896292887	-0.21239277136364132	-0.08458597766283238
Ca(AlCl4)2	1.6168322266666524	3.7126945191666687	0.6667 Ca(AlCl4)2 + Li -> LiAlCl4 + 0.6667 CaCl2 + 0.3333 Al	Ca(AlCl4)2 -> CaCl2 + 3 Cl2 + 2 Al	-0.06085448481482025	-0.190169910555555	-0.2777861093286984
Ca(AlS2)2	1.4073480424999978	2.5576179861458312	0.6667 Ca(AlS2)2 + Li -> LiAlS2 + 0.6667 CaS + 0.3333 Al	Ca(AlS2)2 -> CaS + 3 S + 2 Al	-0.018823820090094312	-0.37230147038043593	-0.8794348211638732
Ca(AlSe2)2	1.4489165216666613	2.3410058078385436	0.6667 Ca(AlSe2)2 + Li -> LiAlSe2 + 0.6667 CaSe + 0.3333 Al	Ca(AlSe2)2 -> CaSe + 3 Se + 2 Al	-0.05101154317989698	-0.30528498942021787	-0.8611106566462583
Ca(AsO3)2	2.878356720208277	4.586193041249995	2 Ca(AsO3)2 + 2.4 Li -> Ca2As2O7 + 0.8 Li3AsO4 + 0.6 As2O3	Ca(AsO3)2 -> As2O5 + 0.5 O2 + Ca	-0.3092761430882356	-0.16215965276585842	-0.057239211681088475
Ca(AuF6)2	6.0428728716666615	6.560964892500008	0.75 Ca(AuF6)2 + Li -> LiAuF6 + 0.75 CaF2 + 0.5 AuF3	0.5 Ca(AuF6)2 -> AuF5 + 0.5 F2 + 0.5 Ca	-0.8360297627012714	-0.0005059831578941854	-0.4315610015147029
Ca(AuO2)2	2.6821907674999856	4.000622089999991	Ca(AuO2)2 + 3 Li -> Li3AuO3 + CaO + Au	2 Ca(AuO2)2 -> O2 + 2 Au2O3 + 2 Ca	-0.7206195929595705	-0.1724698975000032	-0.04348081639453838
Ca(B3O5)2	1.7805505270572226	4.280912163750012	21.67 Ca(B3O5)2 + 16 Li -> B6O + 21.67 CaB4O7 + 5.333 Li3B7O12	0.3333 Ca(B3O5)2 -> B2O3 + 0.1667 O2 + 0.3333 Ca	-0.006055172824594557	-0.19711354349025512	-0.03430985406541476
Ca(BH)12	0.5928112329761976	3.296103956136258	4 Ca(BH)12 + 7 Li -> CaB6 + 7 Li(BH)6 + 3 CaH2	0.9167 Ca(BH)12 -> B9H11 + 2 B + 0.9167 Ca	-0.03451506902916934	-0.18534670874010106	-1.099869672630953
Ca(BH4)2	0.6408762552563791	1.9534603899999994	0.7308 Ca(BH4)2 + Li -> LiBH4 + 0.03846 Ca(BH)12 + 0.6923 CaH2	0.5 Ca(BH4)2 -> BH3 + 0.5 H2 + 0.5 Ca	-0.0501633462962956	-0.19880117327148006	-0.9055475114285689
Ca(BO2)2	1.2561776805207927	3.7282260525000392	22 Ca(BO2)2 + 16 Li -> B6O + 16 LiBO2 + 11 Ca2B2O5	3 Ca(BO2)2 -> Ca2B6O11 + 0.5 O2 + Ca	-0.027971074104819138	-0.2249518523790317	-0.018712034747832895
Ca(BeAs)2	0.7887891120833384	1.2833458251041685	Ca(BeAs)2 + 2 Li -> LiCaAs + LiBeAs + Be	3 Ca(BeAs)2 -> Ca2As3 + CaAs3 + 6 Be	-0.2623396446153863	-0.570703231173332	-1.2059848401041158
Ca(BeN)2	0.0425489933333445	1.1991530356250006	0.5 Ca(BeN)2 + 0.5 Li + 0.5 LiCaN -> LiBeN + 0.5 Ca2N	9 Ca(BeN)2 -> CaN6 + 6 Be3N2 + 8 Ca	-0.29598892380434894	-0.6442418717658813	-0.8285009457643988
Ca(BeP)2	0.6053811386904773	1.3785178822916666	1.077 Ca(BeP)2 + 2.154 Li -> LiCaP + 0.07692 CaBe13 + 1.154 LiBeP	5 Ca(BeP)2 -> Ca5P8 + BeP2 + 9 Be	-0.2279181346774175	-0.5369387832741759	-1.4056198118713708
Ca(BiO2)2	1.821621994166649	3.1149506087500156	Ca(BiO2)2 + 3 Li -> Li3BiO3 + CaO + Bi	1.5 Ca(BiO2)2 -> CaBiO3 + Bi2O3 + 0.5 Ca	-0.3706079604166739	-0.3580384427173937	-0.07583403344035622
Ca(CdP)2	0.7674484420833312	1.397344649999998	Ca(CdP)2 + 4 Li -> Li3P + LiCaP + 2 Cd	Ca(CdP)2 -> Cd + CdP2 + Ca	-0.1763885783870962	-0.34923024002889025	-1.1093264549561406
Ca(CuO2)2	2.5569588458333588	3.9165267368749874	3 Ca(CuO2)2 + 3 Li -> Ca2Cu2O5 + Li3CuO3 + CaCu3O4	Ca(CuO2)2 -> Cu2O3 + 0.5 O2 + Ca	-0.5336452193908241	-0.1869091298076846	-0.0581098759964882
Ca(ErS2)2	0.9250280933333226	2.4377639750000024	Ca(ErS2)2 + Li -> LiErS2 + CaS + ErS	0.5 Ca(ErS2)2 -> ErS2 + 0.5 Ca	-0.0020265380681925294	-0.3686553143478253	-0.7884738364484101
Ca(Ga3Te5)2	1.610607345000009	1.8370407962499609	0.3333 Ca(Ga3Te5)2 + Li -> LiGaTe2 + 0.3333 CaTe + GaTe	0.4 Ca(Ga3Te5)2 -> Ga2Te3 + 0.2 Ga2Te5 + 0.4 Ca	-0.05651041695335146	-0.11796092624373467	-0.7046105331315835
Ca(GaS2)2	1.8799989070833227	2.679204498437503	Ca(GaS2)2 + Li -> LiGaS2 + CaS + GaS	Ca(GaS2)2 -> Ga2S3 + S + Ca	-0.019517067488740825	-0.16848075391666661	-0.7231821808758561
Ca(GaSe2)2	1.853325628333323	2.453512474921867	Ca(GaSe2)2 + Li -> LiGaSe2 + CaSe + GaSe	Ca(GaSe2)2 -> Ga2Se3 + Se + Ca	-0.024363995004221817	-0.14646178977775004	-0.6014052328869035
Ca(H2N)2	0.5055853633333367	1.4668045606249969	Ca(H2N)2 + 2 Li -> LiH2N + CaHN + LiH	9 Ca(H2N)2 -> CaN6 + 12 H3N + 8 Ca	-0.18550475060344374	-0.46917228349998696	-0.4904311464692279
Ca(HO)2	1.1689976183333535	3.5052441662500056	Ca(HO)2 + Li -> LiHO + 0.5 H2 + CaO	2 Ca(HO)2 -> O2 + 2 H2O + 2 Ca	-0.13522840383928525	-0.307869936111111	-0.0795699751859642
Ca(HoS2)2	0.9885003708333535	2.5629329037499873	3 Ca(HoS2)2 + Li -> Ho5S7 + LiHoS2 + 3 CaS	0.5 Ca(HoS2)2 -> HoS2 + 0.5 Ca	-0.0021380063068141553	-0.3670402435869544	-0.7851076677579341
Ca(LuS2)2	0.5588226483333312	2.6432329115625133	Ca(LuS2)2 + 2 Li -> Li2S + CaS + 2 LuS	Ca(LuS2)2 -> Lu2S3 + S + Ca	-4.2748235315867184e-15	-0.3446021606884051	-0.7987438784325374
Ca(MgAs)2	0.36197037966293166	1.3054267451041643	149 Ca(MgAs)2 + 299 Li -> LiMg149 + 149 LiMgAs + 149 LiCaAs	3 Ca(MgAs)2 -> Ca2As3 + CaAs3 + 6 Mg	-0.2412132919205312	-0.5708549581341169	-1.0614224665047112
Ca(NO3)2	2.6791293943333274	4.7689513668749886	0.6 Ca(NO3)2 + Li -> LiNO3 + 0.6 CaO + 0.1 N2	0.5 Ca(NO3)2 -> NO3 + 0.5 Ca	-0.6968901412599768	-0.10619863139706487	-0.01135127649287404
Ca(PO3)2	2.744456626166609	4.428480211874906	2.4 Ca(PO3)2 + Li -> LiPO3 + 0.6 Ca4P6O19 + 0.2 P	3 Ca(PO3)2 -> Ca2P6O17 + 0.5 O2 + Ca	-0.04251751115708702	-0.1402226605612118	-0.11528827021321231
Ca(RhO2)2	2.2964188133333203	2.7899075500000046	Ca(RhO2)2 + 2 Li -> Li2RhO3 + CaO + Rh	0.5 Ca(RhO2)2 -> RhO2 + 0.5 Ca	-0.5756580398498148	-0.24395874022727604	-0.11386134192857078
Ca(YS2)2	1.0685705233333564	2.58384968406251	3 Ca(YS2)2 + Li -> Y5S7 + LiYS2 + 3 CaS	Ca(YS2)2 -> Y2S3 + S + Ca	-0.004105882954545059	-0.3522727744565204	-0.773758409583331
Ca(ZnP)2	0.6512792374696215	1.5021293703125003	55 Ca(ZnP)2 + 110 Li -> Ca4Zn51 + 51 LiCaP + 59 LiZnP	2 Ca(ZnP)2 -> Zn3P2 + ZnP2 + 2 Ca	-0.18202088294930707	-0.32751186995944437	-1.136858104788009
Ca10Ag(PO4)7	3.31581667722217	3.9884675995831333	0.3 Ca10Ag(PO4)7 + 0.3 Li -> Ca3(PO4)2 + 0.1 Li3PO4 + 0.3 Ag	0.4 Ca10Ag(PO4)7 -> Ca3(PO4)2 + 0.4 AgO + 0.4 Ca2P2O7 + 0.2 Ca	-0.029252677664919347	-0.1762064032846271	-0.018709262867845133
Ca10P6SO24	1.132685872988887	2.6406470603124887	4.111 Ca10P6SO24 + 50 Li -> Ca5P8 + 32 CaO + 16.67 Li3PO4 + 4.111 CaS	0.3333 Ca10P6SO24 -> Ca3(PO4)2 + 0.3333 S + 0.3333 Ca	-0.014633393917439008	-0.190916421793351	-0.17588614456394236
Ca10P6SeO24	1.111823489999995	2.625902957421847	4.111 Ca10P6SeO24 + 50 Li -> Ca5P8 + 32 CaO + 16.67 Li3PO4 + 4.111 CaSe	0.3333 Ca10P6SeO24 -> Ca3(PO4)2 + 0.3333 Se + 0.3333 Ca	-0.020815676011146422	-0.19083534748030173	-0.12253057846990778
Ca11Al14O32	0.8020095272618621	3.415762704999987	0.5714 Ca11Al14O32 + Li -> Ca6Al7O16 + LiAlO2 + 0.2857 CaO	0.2857 Ca11Al14O32 -> CaAl4O7 + 1.071 O2 + 2.143 Ca	-0.14051865828083443	-0.36264433710811206	-0.08230976982012095
Ca11Sn3C8	6.661338147750939e-16	0.35682057425000496	Li -> Li	0.3333 Ca11Sn3C8 -> Ca2Sn + 2.667 C + 1.667 Ca	-0.6058612121732931	-0.9762355976231052	-1.2135403081141751
Ca12Al11Si3Cl5O32	0.9744780095833361	3.5963637822916574	0.5 Ca12Al11Si3Cl5O32 + 2 Li -> Ca3Si(ClO2)2 + 0.5 Ca6Al7ClO16 + 2 LiAlO2 + 0.5 Si	Ca12Al11Si3Cl5O32 -> Ca(ClO3)2 + 1.5 CaAl2(SiO4)2 + 2 CaAl4O7 + 1.5 CaCl2 + 6 Ca	-0.07914644453669695	-0.31224619477045845	-0.05677034377361956
Ca14GaAs11	0.6936195680747073	1.0670950887500124	2 Ca14GaAs11 + 14.5 Li -> CaGa2 + 2.5 Ca5As3 + 14.5 LiCaAs	Ca14GaAs11 -> Ca3GaAs3 + 8 CaAs + 3 Ca	-0.3228599311226139	-0.5999708476053645	-0.9989647835914486
Ca19(Mg4H27)2	0.549001811782297	0.9319896393749928	18.63 Ca19(Mg4H27)2 + 299 Li -> LiMg149 + 298 LiH + 353.9 CaH2	0.05263 Ca19(Mg4H27)2 -> CaH2 + 0.4211 H2 + 0.4211 Mg	-0.26686730160097905	-0.5161436822700534	-0.9851524308616775
Ca19Mg2(PO4)14	1.354073976879297	4.006155883092056	0.1593 Ca19Mg2(PO4)14 + 0.4513 Li -> Ca3(PO4)2 + 0.1504 Li3PO4 + 0.02655 CaP3 + 0.3186 MgO	1.5 Ca19Mg2(PO4)14 -> Mg3(PO4)2 + 9.5 Ca2P2O7 + 4.75 O2 + 9.5 Ca	-0.012858988767090906	-0.17688060665713046	-0.0032399569542507223
Ca21(Zn2As9)2	0.7514468245720738	1.125349848499987	0.3793 Ca21(Zn2As9)2 + 3.828 Li -> Ca4As3 + 3.828 LiCaAs + 0.1379 CaZn11	0.5 Ca21(Zn2As9)2 -> Ca(ZnAs)2 + 7 CaAs + 2.5 Ca	-0.30966919841069207	-0.573735588015434	-0.9516687818473926
Ca2Al2Sn2O9	1.9160840183333256	3.647421140833354	Ca2Al2Sn2O9 + 2 Li -> CaSnO3 + 0.5 Ca2SnO4 + 2 LiAlO2 + 0.5 Sn	2 Ca2Al2Sn2O9 -> CaAl4O7 + 4 SnO2 + 1.5 O2 + 3 Ca	-0.2057759439279927	-0.2912047117142831	-0.04184283676508782
Ca2Al3H3O8	1.4427704102565184	3.571784495624998	9 Ca2Al3H3O8 + 13 Li -> Ca11Al14O32 + 13 LiAlO2 + 7 Ca(HO)2 + 6.5 H2	0.3333 Ca2Al3H3O8 -> AlHO2 + 0.3333 O2 + 0.6667 Ca	-0.0813556815624743	-0.30364609714285784	-0.05251144375557759
Ca2Al8PbO15	2.0954582495833565	3.3613561212498126	15 Ca2Al8PbO15 + 30 Li -> Ca11Al14O32 + 19 CaAl4O7 + 30 LiAlO2 + 15 Pb	2.5 Ca2Al8PbO15 -> Al2PbO4 + 0.5 Pb3O4 + 4.5 CaAl4O7 + 0.5 Ca	-0.09708441189453598	-0.3180782286918613	-0.03959003706113595
Ca2AlH10BrO8	1.5984392308332578	3.6156177788750057	0.5 Ca2AlH10BrO8 + 0.5 Li -> Ca(HO)2 + 0.25 LiAl2H6BrO6 + 0.25 LiH2BrO + 0.25 H2O + 0.25 H2	3.6 Ca2AlH10BrO8 -> Br2O3 + 1.2 Ca2Al3H3O8 + 16.2 H2O + 0.8 CaBr2 + 4 Ca	-0.06838407987500039	-0.2079227900499987	-0.03941964224120964
Ca2AlH10IO8	1.5636727483333597	3.065924217703525	Ca2AlH10IO8 + 3 Li -> Li2HIO + LiAlO2 + 2 Ca(HO)2 + H2O + 1.5 H2	3 Ca2AlH10IO8 -> Ca2Al3H3O8 + 0.4167 Ca(IO3)2 + 13.5 H2O + 2.167 I + 3.583 Ca	-0.0654512061764767	-0.20393454012018974	-0.1273808915232184
Ca2AlPbF9	2.5595873483333564	4.75283896999987	Ca2AlPbF9 + Li -> LiCaAlF6 + CaF2 + 0.5 Pb + 0.5 PbF2	Ca2AlPbF9 -> CaAlF5 + 0.5 CaPbF6 + 0.5 PbF2 + 0.5 Ca	-0.09442787849999057	-0.06244618797618218	-0.07755395218749728
Ca2As2O7	2.841895605922595	3.7932377124999817	1.5 Ca2As2O7 + 1.2 Li -> Ca3(AsO4)2 + 0.4 Li3AsO4 + 0.3 As2O3	Ca2As2O7 -> Ca(AsO3)2 + 0.5 O2 + Ca	-0.26967922448812676	-0.1871523586816093	-0.0405780614544522
Ca2As3Pb3ClO12	2.377926617479055	3.932335137916621	2.5 Ca2As3Pb3ClO12 + 5 Li -> Ca5As3ClO12 + 0.1667 As2Pb14Cl4O17 + 1.667 Li3AsO4 + PbO + 0.8333 As3Pb5ClO9	5 Ca2As3Pb3ClO12 -> Ca(ClO3)2 + 3 Ca(AsO3)2 + 3 As3Pb5ClO12 + 6 Ca	-0.2822118093028947	-0.19120914087607455	-0.07314372572220407
Ca2AsClO4	1.8352892994444532	3.8738347595833194	1.6 Ca2AsClO4 + 3 Li -> Li3AsO4 + 2.133 CaO + 0.2667 Ca4Cl6O + 0.6 As	2 Ca2AsClO4 -> Ca(AsO3)2 + 0.3333 Ca(ClO3)2 + 0.6667 CaCl2 + 2 Ca	-0.2074107391549318	-0.20490585604166167	-0.043326824560529165
Ca2AsI	0.06870711208331981	1.100792398750014	3 Ca2AsI + 2 Li -> Ca3AsI3 + 2 LiCaAs + Ca	3 Ca2AsI -> Ca3AsI3 + 2 CaAs + Ca	-0.2882908125961512	-0.522412310914	-0.8281661873671402
Ca2B2O5	0.9901434215832978	3.655902091249997	0.9 Ca2B2O5 + Li -> LiCaBO3 + 0.25 Ca3(BO3)2 + 0.05 CaB6	Ca2B2O5 -> Ca(BO2)2 + 0.5 O2 + Ca	-0.07195755330146092	-0.2734743464290923	-0.038843678346912824
Ca2B5BrO9	1.262966411302053	3.9468589279861725	0.5 Ca2B5BrO9 + 0.7273 Li -> Ca(BO2)2 + 0.2273 LiBO2 + 0.04545 B6O + 0.5 LiBr	0.8 Ca2B5BrO9 -> CaB4O7 + 0.06667 Br2O3 + 0.6667 Br + 0.6 Ca	-0.001317254261951284	-0.20454812478261974	-0.033299234679802225
Ca2B5ClO9	1.2870131213732048	4.027726903645776	27.2 Ca2B5ClO9 + 35.2 Li -> Li10B14Cl2O25 + 54.4 Ca(BO2)2 + 2.2 B6O + 25.2 LiCl	1.2 Ca2B5ClO9 -> Ca(B3O5)2 + 0.1333 Ca(ClO3)2 + 0.4667 CaCl2 + 0.8 Ca	-0.002646626426352938	-0.20422921333333544	-0.05578608171055466
Ca2B6O11	1.415390126406443	3.827824265624909	21.67 Ca2B6O11 + 16 Li -> B6O + 43.33 Ca(BO2)2 + 5.333 Li3B7O12	0.6667 Ca2B6O11 -> CaB4O7 + 0.1667 O2 + 0.3333 Ca	-0.013587729848948626	-0.21073095659090457	-0.019606838053132236
Ca2B8H2O15	1.9378549979166233	3.825207240000069	2.5 Ca2B8H2O15 + 3 Li -> Li3B5(HO5)2 + 2.5 Ca2B6O11 + 1.5 H2	2 Ca2B8H2O15 -> CaB8H4O15 + 1.333 Ca2B6O11 + 0.1667 O2 + 0.3333 Ca	-0.01224096679741038	-0.19738256154867573	-0.022668138795607362
Ca2BClO3	0.5884678520833369	3.6388686416666536	4.571 Ca2BClO3 + 8.571 Li -> Li4Ca(BO3)2 + 0.4286 CaB6 + 7.714 CaO + 4.571 LiCl	5 Ca2BClO3 -> Ca2B5ClO9 + Ca(ClO3)2 + CaCl2 + 6 Ca	-0.07823594523474586	-0.2720748372344781	-0.05329139681693995
Ca2BHN2	0.07475048333331524	0.890060140624994	3 Ca2BHN2 + Li -> LiCa4(BN2)3 + 1.5 CaH2 + 0.5 Ca	4 Ca2BHN2 -> Ca3(BN2)2 + Ca(H2N)2 + 2 BN + 4 Ca	-0.40072186869675264	-0.6700287073333344	-0.8491830910140115
Ca2BN2Cl	1.2434497875801753e-14	1.2381164918749927	Li -> Li	6 Ca2BN2Cl -> CaN6 + 6 BN + 3 CaCl2 + 8 Ca	-0.3512899923750057	-0.6288130367857101	-0.7043073710857124
Ca2BN2F	1.1650300945832992	1.178582780937496	2 Li + 3.5 Ca3(BN2)2 + 0.5 CaN2 -> Ca3BN3 + 2 LiCa4(BN2)3	6 Ca2BN2F -> CaN6 + 6 BN + 3 CaF2 + 8 Ca	-0.3598528891249666	-0.6185489071428671	-0.7099975125568001
Ca2BiAsO6	1.9908076866667075	3.635374898571384	Ca2BiAsO6 + 3 Li -> Li3AsO4 + 2 CaO + Bi	Ca2BiAsO6 -> BiO2 + 0.5 Ca3(AsO4)2 + 0.5 Ca	-0.27302940840242496	-0.2720381475000213	-0.039971010868336876
Ca2BrN	0.0	1.0715619537500105	Li -> Li	6 Ca2BrN -> CaN6 + 3 CaBr2 + 8 Ca	-0.49458474796874974	-0.787313042916667	-0.7521471863387723
Ca2CdAs2	0.8655453391666672	1.1615730549999905	6 Ca2CdAs2 + 15 Li + Ca4As3 -> CaCd6 + 15 LiCaAs	2 Ca2CdAs2 -> Ca(CdAs)2 + 2 CaAs + Ca	-0.26838739679824664	-0.5225667942707712	-0.8528733982443204
Ca2CdP2	0.8883159202083348	1.087283548333334	4 Ca2CdP2 + 8 Li + CaCd2 -> CaCd6 + 8 LiCaP	2 Ca2CdP2 -> Ca(CdP)2 + 2 CaP + Ca	-0.2869487649381197	-0.5438504233092307	-1.26579422755848
Ca2Co3O8	3.38724426999997	3.4747238580000013	0.3333 Ca2Co3O8 + Li -> LiCoO2 + 0.6667 CaO	1.333 Ca2Co3O8 -> Ca(CoO2)4 + 1.333 O2 + 1.667 Ca	-0.6213268607695914	-0.23177068467262085	-0.138091226621619
Ca2CoTeO6	2.7167780398332795	3.297425907500026	7 Ca2CoTeO6 + 4 Li -> Li4CoTeO6 + 2 CaTeO3 + 4 Ca3TeO6 + 6 CoO	3 Ca2CoTeO6 -> Co3O4 + 2 CaTeO4 + Ca3TeO6 + Ca	-0.3441965532904083	-0.2575607344444655	-0.056886969850006075
Ca2CoWO6	2.3211118033333156	3.148097017500034	3 Ca2CoWO6 + 2 Li -> Li2WO4 + 2 Ca3WO6 + 2 CoO + Co	1.5 Ca2CoWO6 -> CaWO4 + 0.5 Ca3WO6 + 0.5 Co3O4 + 0.5 Ca	-0.3419072327232082	-0.27948175329547764	-0.0631783614814978
Ca2Cu2O5	2.5101857483333134	3.342902161250004	2 Ca2Cu2O5 + 3 Li -> Li3CuO3 + CaCu3O4 + 3 CaO	Ca2Cu2O5 -> Ca(CuO2)2 + 0.5 O2 + Ca	-0.4823971114950938	-0.2980456819117694	-0.10712107638888257
Ca2CuTe4(ClO5)2	2.807962263333393	3.4238821568749858	0.5 Ca2CuTe4(ClO5)2 + Li -> CaTe2O5 + LiCl + 0.5 Cu	Ca2CuTe4(ClO5)2 -> CaTe3O8 + CuCl2 + TeO2 + Ca	-0.3125297635370874	-0.9935010065909999	-0.1705107617500108
Ca2FeH6	0.07659387333334156	1.3535123987499993	0.5 Ca2FeH6 + Li -> LiH + CaH2 + 0.5 Fe	0.4 Ca2FeH6 -> H2 + 0.4 FeH + 0.8 Ca	-0.1773646195970593	-0.33285263249529917	-2.083054270565601
Ca2FeWO6	1.946274958333305	2.659410784999992	3 Ca2FeWO6 + 4 Li -> Li4WO5 + FeO + 2 Ca3WO6 + 2 Fe	1.333 Ca2FeWO6 -> CaWO4 + 0.3333 Ca3WO6 + 0.6667 Fe2O3 + 0.6667 Ca	-0.3305737671022979	-0.2371607845624606	-0.12086258783783954
Ca2Ga2Si(HO4)2	1.7654873220833074	3.7148342633332385	Ca2Ga2Si(HO4)2 + 2 Li -> Ca2SiO4 + 2 LiGaO2 + H2	0.5 Ca2Ga2Si(HO4)2 -> GaHO2 + 0.5 CaSiO3 + 0.25 O2 + 0.5 Ca	-0.1712556037780244	-0.23066650918181142	-0.03526898425437075
Ca2Ge7O16	2.199748430583335	3.9281718608333196	0.5 Ca2Ge7O16 + 3.333 Li -> CaGeO3 + 1.667 Li2GeO3 + 0.8333 Ge	Ca2Ge7O16 -> O2 + 7 GeO2 + 2 Ca	-0.25397702881589446	-0.1715172165116341	-0.04291074532884043
Ca2GeO4	1.330376678333304	3.60434305166668	1.5 Ca2GeO4 + 2 Li -> Li2CaGeO4 + 2 CaO + 0.5 Ge	Ca2GeO4 -> CaGeO3 + 0.5 O2 + Ca	-0.2245985731666038	-0.3199418310000026	-0.060656728353904565
Ca2GeS4	1.799854770833353	2.6214172442708383	2 Ca2GeS4 + 4 Li -> Li4GeS4 + 4 CaS + Ge	Ca2GeS4 -> GeS2 + 2 S + 2 Ca	-7.156402530096783e-15	-0.2614670898749991	-0.7393099611721672
Ca2H6Os	0.0	1.4749178787499986	Li -> Li	Ca2H6Os -> Os + 3 H2 + 2 Ca	-0.14548587769999632	-0.2904079699294124	-0.7528781610526316
Ca2H6Ru	0.0	1.4916034087499987	Li -> Li	Ca2H6Ru -> Ru + 3 H2 + 2 Ca	-0.1534303505000001	-0.2871174466941193	-0.7499340086842099
Ca2HN	8.881784197001252e-16	0.7329839074999976	Li -> Li	Ca2HN -> CaHN + Ca	-0.538292525713443	-0.8063847200216658	-0.987947596787186
Ca2IN	0.03766240333331914	0.9116824575000062	Ca2IN + Li -> LiI + Ca2N	2 Ca2IN -> CaN2 + CaI2 + 2 Ca	-0.5296529067187548	-0.8189049954166621	-0.8041222346353312
Ca2Mg5Si8(HO12)2	1.603213385000025	3.7699320325833585	0.8333 Ca2Mg5Si8(HO12)2 + 2 Li -> Li2Si2O5 + 1.667 CaMg(SiO3)2 + 1.25 Mg2SiO4 + 0.08333 SiH8 + 0.5 H2	0.5 Ca2Mg5Si8(HO12)2 -> CaSiO3 + 3 SiO2 + 1.25 O2 + 0.5 H2O + 2.5 Mg	-0.020324978640345215	-0.22539142305732085	-0.025141414839784382
Ca2Mg5Si8(O11F)2	1.2324459738750615	3.7561117526666714	0.225 Ca2Mg5Si8(O11F)2 + 2 Li -> Li2MgSiO4 + 0.25 CaSiO3 + 0.025 Mg5Si2(O4F)2 + 0.2 CaF2 + 0.5 Si	Ca2Mg5Si8(O11F)2 -> CaSiO3 + CaF2 + 7 SiO2 + 2.5 O2 + 5 Mg	-0.01629180590685486	-0.2191560856208059	-0.025884536758255194
Ca2MgWO6	1.7042668358333097	3.6522178824999982	1.5 Ca2MgWO6 + 1.2 Li -> Ca3WO6 + 0.3 Li4WO5 + 1.5 MgO + 0.2 W	Ca2MgWO6 -> MgWO4 + O2 + 2 Ca	-0.26512895546348236	-0.3112314323863772	-0.05023976886233905
Ca2Mn3O8	2.703680654583321	3.8055467181249885	Ca2Mn3O8 + 2 Li -> Li2MnO3 + CaMn2O4 + CaO	0.3333 Ca2Mn3O8 -> MnO2 + 0.3333 O2 + 0.6667 Ca	-0.38581034524551816	-0.22027464914401929	-0.05240717570773734
Ca2MnAs2(H2O5)2	2.515154159861048	3.4603820531696314	2.5 Ca2MnAs2(H2O5)2 + 1.059 Li -> Ca5As3HO13 + 0.2647 Mn(AsO2)2 + 1.118 Mn2AsHO5 + 0.3529 Li3AsO4 + 3.941 H2O	7 Ca2MnAs2(H2O5)2 -> Ca5As3HO13 + 3.5 Mn2O3 + 5.5 Ca(AsO3)2 + 13.5 H2O + 3.5 Ca	-0.2228443283481396	-0.17958902519233821	-0.07979175415636774
Ca2MnWO6	1.7482800483333198	2.897003729999875	1.5 Ca2MnWO6 + 1.2 Li -> Ca3WO6 + 0.3 Li4WO5 + 1.5 MnO + 0.2 W	1.5 Ca2MnWO6 -> CaWO4 + 0.5 Mn3O4 + 0.5 Ca3WO6 + 0.5 Ca	-0.3095744834222782	-0.29249115215908095	-0.10725328880682561
Ca2NCl	4.77076479635363e-15	1.101169715000003	Li -> Li	6 Ca2NCl -> CaN6 + 3 CaCl2 + 8 Ca	-0.48477214484374986	-0.7638944483333407	-0.7411272001823099
Ca2NF	3.9968028886505635e-15	0.9774509164583405	Li -> Li	2 Ca2NF -> CaN2 + CaF2 + 2 Ca	-0.5122665182291688	-0.7938177865000062	-0.7962410105224449
Ca2Nb2O7	1.4895674279166577	3.5809779100000014	2 Ca2Nb2O7 + 3 Li -> Ca4Nb2O9 + 0.5 Li3NbO4 + 1.5 LiNbO2	Ca2Nb2O7 -> CaNb2O6 + 0.5 O2 + Ca	-0.15809859032229534	-0.24932481348684554	-0.0399181753248401
Ca2NbCrO6	1.4416136350000466	3.20144723312497	2 Ca2NbCrO6 + 1.5 Li -> Ca4Nb2O9 + 1.5 LiCrO2 + 0.5 Cr	2 Ca2NbCrO6 -> Ca2Nb2O7 + 0.8 CaCrO4 + 0.6 Cr2O3 + 1.2 Ca	-1.5562166363849337	-0.29062094229456825	-1.711429084583325
Ca2NbFeO6	1.9364405283333497	3.519920406874973	2 Ca2NbFeO6 + Li -> LiFeO2 + Ca4Nb2O9 + FeO	2 Ca2NbFeO6 -> Ca2Nb2O7 + Fe2O3 + O2 + 2 Ca	-0.23384073425829133	-0.23779535574218524	-0.056497905797060266
Ca2NbN3	0.47769369261901673	1.2908672994117694	7.5 Ca2NbN3 + 7 Li -> Li7NbN4 + 3 Ca5NbN5 + 3.5 NbN	5 Ca2NbN3 -> Nb5N6 + 1.5 CaN6 + 8.5 Ca	-0.3695283586249696	-0.6644117145253827	-0.8242283046599965
Ca2NiWO6	2.3574654433333113	3.707843201666654	3 Ca2NiWO6 + 2 Li -> Li2WO4 + 2 Ca3WO6 + 2 NiO + Ni	3 Ca2NiWO6 -> Ni3O4 + 3 CaWO4 + O2 + 3 Ca	-0.3691684846371044	-0.28081173874999754	-0.047596235340407134
Ca2P2O7	2.121510076555534	4.2831087481250165	1.5 Ca2P2O7 + 1.875 Li -> Ca3(PO4)2 + 0.625 Li3PO4 + 0.375 P	3 Ca2P2O7 -> Ca4P6O19 + O2 + 2 Ca	-0.017469956395741004	-0.15030960704918273	-0.05183332823671183
Ca2P3Pb3ClO12	2.2150185737963772	4.1508424687499454	2.5 Ca2P3Pb3ClO12 + 13.5 Li -> Ca5P3ClO12 + 4.5 Li3PO4 + 0.75 PbCl2 + 6.75 Pb	9 Ca2P3Pb3ClO12 -> Pb(ClO3)2 + 5 P3Pb5ClO12 + PbCl2 + 6 Ca2P2O7 + 6 Ca	-0.10297868959458967	-0.1581906853211783	-0.07761228583336166
Ca2P6O17	2.8011159806666086	4.537361501249927	0.5 Ca2P6O17 + 0.8333 Li -> Ca(PO3)2 + 0.8333 LiPO3 + 0.1667 P	0.6667 Ca2P6O17 -> CaP4O11 + 0.1667 O2 + 0.3333 Ca	-0.05786511329588517	-0.13733975561110157	-0.14567316879455738
Ca2PClO4	1.0348738764583412	4.1624054092499625	1.4 Ca2PClO4 + 3.2 Li -> Li3PO4 + 0.4 Ca3PCl3 + 1.6 CaO + 0.2 LiCl	2.667 Ca2PClO4 -> CaCl2 + 0.6667 ClO2 + 1.333 Ca2P2O7 + 1.667 Ca	0.0	-0.16033417705188446	-0.03946346819791602
Ca2PI	0.01741941083333587	1.1197729470833477	2 Li + Ca -> Li2Ca	3 Ca2PI -> Ca3PI3 + 2 CaP + Ca	-0.2881063856907846	-0.5582479324999996	-1.15169623426587
Ca2PN3	0.3168016114047436	1.7622996514062552	3 Ca2PN3 + 11.67 Li -> Ca2N + 1.667 Li7PN4 + 1.333 Ca3PN	4.5 Ca2PN3 -> CaN6 + 1.5 P3N5 + 8 Ca	-0.3019363101250052	-0.5823522452380665	-0.8071047457076133
Ca2PbO4	2.311887851614574	3.503200618750001	3 Ca2PbO4 + 4 Li -> Li4PbO4 + 6 CaO + 2 PbO	Ca2PbO4 -> PbO2 + O2 + 2 Ca	-0.4332104553365337	-0.36802325749999776	-0.12564734662849597
Ca2Pt3O8	2.5220767783333677	3.783317621250006	0.5 Ca2Pt3O8 + 2 Li -> Li2PtO3 + CaO + 0.5 Pt	0.3333 Ca2Pt3O8 -> PtO2 + 0.3333 O2 + 0.6667 Ca	-0.633191044809787	-0.21413932660000423	-0.036043297924985396
Ca2ScNbO6	3.7826176733331636	3.525021144687479	0.125 Li + CaO2 -> CaO + 0.125 LiO8	2 Ca2ScNbO6 -> Ca2Nb2O7 + O2 + Sc2O3 + 2 Ca	-0.15291761183478592	-0.3324455942447928	-0.05692597979686287
Ca2ScTaO6	0.6854657298333251	3.57995799854166	2 Ca2ScTaO6 + 5 Li -> Li3TaO4 + 4 CaO + 2 LiScO2 + Ta	2 Ca2ScTaO6 -> CaTa2O6 + 1.5 O2 + Sc2O3 + 3 Ca	-0.10616910169667992	-0.3204054073986913	-0.053626490711319974
Ca2Se3O8	2.6029249354947934	3.6170750762499235	2 Ca2Se3O8 + 2 Li -> Li2SeO4 + 4 CaSeO3 + Se	3 Ca2Se3O8 -> CaSeO4 + 4 CaSe2O5 + Ca	-0.38188014230699263	-0.17151969401961087	-0.1314496056790131
Ca2Si3Pb3O11	2.0365640578906117	3.4843400091666545	0.5 Ca2Si3Pb3O11 + 2 Li -> Li2SiO3 + 0.5 Ca2SiO4 + Pb + 0.5 PbO	0.5 Ca2Si3Pb3O11 -> SiPbO3 + 0.5 CaSiO3 + 0.5 PbO2 + 0.5 Ca	-0.19451193928877242	-0.270535889508547	-0.06922516419190305
Ca2Si5N8	0.6035840904166676	1.6432573676562585	0.6667 Ca2Si5N8 + Li -> LiSi2N3 + 0.1667 CaSi + 1.167 CaSiN2	4.5 Ca2Si5N8 -> CaN6 + 7.5 Si3N4 + 8 Ca	-0.1455616081967177	-0.4755987303968232	-0.779142388863737
Ca2SiO4	0.5010160820833593	3.561625094583339	2 Ca2SiO4 + 4 Li -> Li4SiO4 + 4 CaO + Si	Ca2SiO4 -> CaSiO3 + 0.5 O2 + Ca	-0.12048827420454256	-0.330919488666674	-0.05788435206576592
Ca2Sn3O8	1.8916974820834227	3.573893541250002	0.5 Ca2Sn3O8 + 0.5 Li -> CaSnO3 + 0.25 Li2SnO3 + 0.25 SnO	0.3333 Ca2Sn3O8 -> SnO2 + 0.3333 O2 + 0.6667 Ca	-0.27055501672414595	-0.2706682598648684	-0.05267505992674426
Ca2SnO4	1.4403541283333068	3.415458032500016	1.5 Ca2SnO4 + 2 Li -> Li2SnO3 + 3 CaO + 0.5 Sn	Ca2SnO4 -> CaSnO3 + 0.5 O2 + Ca	-0.27139412750000735	-0.37458299499999903	-0.08735526651981029
Ca2SnS4	1.9428065208333258	2.577442369687504	3 Ca2SnS4 + 4 Li -> Li4SnS4 + 6 CaS + 2 SnS	Ca2SnS4 -> SnS2 + 2 S + 2 Ca	-1.1724079164641768e-15	-0.27327437783333064	-0.737547067554947
Ca2Ta2O7	1.1439928176190683	3.509109703928601	1.9 Ca2Ta2O7 + 2 Li -> Li2CaTa2O7 + 0.7 Ca4Ta2O9 + 0.4 Ta	Ca2Ta2O7 -> CaTa2O6 + 0.5 O2 + Ca	-0.08137064534404903	-0.2664630367002432	-0.04720460899311263
Ca2TaCrO6	1.3757251133333475	3.2544237286110986	2 Ca2TaCrO6 + 1.5 Li -> Ca4Ta2O9 + 1.5 LiCrO2 + 0.5 Cr	2 Ca2TaCrO6 -> CaTa2O6 + 1.2 CaCrO4 + 0.4 Cr2O3 + 1.8 Ca	-1.5026503212452655	-0.283889252328434	-1.7093752059374974
Ca2TaMoO6	1.8755400480555275	2.249731949999939	1.833 Ca2TaMoO6 + 1.5 Li -> CaMoO3 + 0.6667 Ca4Ta2O9 + 0.5 Li3TaO4 + 0.8333 Mo	Ca2TaMoO6 -> CaMoO3 + 0.5 CaTa2O6 + 0.5 Ca	-0.2557775746822326	-0.2926673666554267	-0.22979439526470102
Ca2TaN3	0.11072366738093198	1.2746697028906209	Ca2TaN3 + 3 Li -> Ca2N + 0.4286 Li7TaN4 + 0.2857 Ta2N	4.5 Ca2TaN3 -> CaN6 + 1.5 Ta3N5 + 8 Ca	-0.3815276230000091	-0.6740398867934574	-0.8581362190409489
Ca2Ti3O8	1.7257621900000402	3.6915456156250004	3 Li + 3 Li4Ti5O12 -> Li7Ti11O24 + 4 Li2TiO3	0.3333 Ca2Ti3O8 -> TiO2 + 0.3333 O2 + 0.6667 Ca	-0.09960525086204974	-0.27839154858107973	-0.03716833297616118
Ca2V2O7	2.520015603809469	3.858654704999992	4 Ca2V2O7 + 3 Li -> Ca2V3O8 + Li3VO4 + 2 Ca3V2O8	Ca2V2O7 -> CaV2O6 + 0.5 O2 + Ca	-0.2910700551749996	-0.198928408597558	-0.01992676781056657
Ca2V3Ni2AgO12	3.253274296666655	3.630517981666757	Ca2V3Ni2AgO12 + Li -> Ca2V2O7 + 0.3333 V2Ni3O8 + 0.3333 Li3VO4 + NiO + Ag	1.25 Ca2V3Ni2AgO12 -> Ca2V2O7 + 0.08333 VAg3O4 + 0.8333 V2Ni3O8 + AgO + 0.5 Ca	-0.3795209738115517	-0.19931632344594252	-0.04075157797965501
Ca2V3O8	2.136729217440461	2.5748816249999114	2 Ca2V3O8 + 2 Li -> CaV2O4 + 2 LiVO2 + Ca3V2O8	0.8 Ca2V3O8 -> CaV2O5 + 0.2 Ca2V2O7 + 0.2 Ca	-0.2813927575862025	-0.24097774476950207	-0.1692448160416653
Ca2VBiO6	1.924967051666714	3.684221009642892	Ca2VBiO6 + 3 Li -> Li3VO4 + 2 CaO + Bi	3 Ca2VBiO6 -> Ca3V2O8 + CaVBiO5 + CaBi2O5 + Ca	-0.2907831216193384	-0.28176554526041464	-0.047088016034189106
Ca2VClO4	1.6988928420833425	3.835632709583324	Ca2VClO4 + 2 Li -> LiVO2 + 2 CaO + LiCl	2 Ca2VClO4 -> CaV2O6 + 0.3333 Ca(ClO3)2 + 0.6667 CaCl2 + 2 Ca	-0.23384978992187433	-0.22609160090002067	-0.039425517031253854
Ca2VN3	0.16044104853575425	1.5020252165000048	1.5 Ca2VN3 + 2.5 Li -> Ca3VN3 + 0.3571 Li7VN4 + 0.07143 V2N	3 Ca2VN3 -> CaN6 + 3 VN + 5 Ca	-0.2984142722129359	-0.6190231619048006	-0.6418422312212257
Ca2YAs(WO6)2	2.3643748250000316	3.8641824024999876	0.8 Ca2YAs(WO6)2 + 1.5 Li -> CaWO4 + 0.4 Y2WO6 + 0.2 Ca3WO6 + 0.5 Li3AsO4 + 0.3 As	0.5 Ca2YAs(WO6)2 -> WO3 + 0.5 YAsO4 + 0.5 O2 + Ca	-0.31232146426471097	-0.19856615088594531	-0.023795855119043807
Ca2Zn3Si3PbO12	2.1892643154166525	3.4846478688541573	0.5 Ca2Zn3Si3PbO12 + Li -> CaSiO3 + 0.5 Li2ZnSiO4 + ZnO + 0.5 Pb	3 Ca2Zn3Si3PbO12 -> ZnSiPbO4 + 4 CaSiO3 + 4 Zn2SiO4 + 2 PbO2 + 2 Ca	-0.22227437896644808	-0.2375767483333333	-0.043697627770267644
Ca2ZnN2	0.4603657369047971	1.071977435000008	0.5833 Li + 0.25 Ca4Zn51 -> CaZn11 + 0.5833 LiZn3	2 Ca2ZnN2 -> Ca(ZnN)2 + 0.3333 CaN6 + 2.667 Ca	-0.49577952178571505	-0.8070847803365366	-0.8184490091217334
Ca2Zr5Ti2O16	1.0131678064583411	3.621291804062327	0.5 Ca2Zr5Ti2O16 + Li -> LiTiO2 + CaZrO3 + 1.5 ZrO2	1.5 Ca2Zr5Ti2O16 -> Ca2Ti3O8 + 7.5 ZrO2 + 0.5 O2 + Ca	-0.07641872472039424	-0.2733961652637751	-0.028844680036245407
Ca3(AlAs2)2	0.6427185775000024	1.2735036267857174	0.3333 Ca3(AlAs2)2 + Li -> LiCaAs + 0.3333 Al + 0.3333 AlAs	1.5 Ca3(AlAs2)2 -> CaAs3 + 3 AlAs + 3.5 Ca	-0.2609798755357162	-0.5499764050472726	-1.1511093017152556
Ca3(AlN2)2	0.12014187833328727	0.9175552009374991	2 Ca3(AlN2)2 + Li -> Ca3Al3N5 + LiCaAlN2 + Ca2N	1.5 Ca3(AlN2)2 -> Ca3Al3N5 + 0.5 CaN2 + Ca	-0.4749586906617682	-0.7515682998214288	-0.9157053542206524
Ca3(AlP2)2	0.5011541874999905	1.2292616342857177	Ca3(AlP2)2 + 6 Li -> Li3P + 3 LiCaP + 2 Al	4 Ca3(AlP2)2 -> Ca5P8 + 8 AlP + 7 Ca	-0.24044090648233585	-0.5353830070602605	-1.3812736681467943
Ca3(AsO4)2	1.9721854809047543	3.7713610439285574	0.8 Ca3(AsO4)2 + 3 Li -> Li3AsO4 + 2.4 CaO + 0.6 As	Ca3(AsO4)2 -> Ca2As2O7 + 0.5 O2 + Ca	-0.24641236254099264	-0.21464221014285512	-0.025201345162151778
Ca3(BN2)2	0.3956552558332729	1.1298931709374913	1.5 Ca3(BN2)2 + Li -> LiCa4(BN2)3 + 0.5 Ca	3 Ca3(BN2)2 -> CaN6 + 6 BN + 8 Ca	-0.42352250034314487	-0.710125339285713	-0.8172531930435429
Ca3(BO3)2	0.6545038295834029	3.505982052499985	0.65 Ca3(BO3)2 + Li -> LiCaBO3 + 0.05 CaB6 + 0.9 CaO	Ca3(BO3)2 -> Ca2B2O5 + 0.5 O2 + Ca	-0.11297713197129422	-0.3252011051449579	-0.055516109934847346
Ca3(GaN2)2	0.7054710983333194	0.974973351250006	2 Ca3(GaN2)2 + 2 Li -> CaGaN + Ca3GaN3 + 2 LiCaGaN2	Ca3(GaN2)2 -> CaN2 + 2 GaN + 2 Ca	-0.4662750586764677	-0.744575598095238	-0.8166603975900197
Ca3(GaP2)2	0.8454546133333327	1.1072799208333355	Ca3(GaP2)2 + 2 Li -> Ca(GaP)2 + 2 LiCaP	0.5 Ca3(GaP2)2 -> CaP + GaP + 0.5 Ca	-0.26205966454686047	-0.5036113018568713	-1.290290314314803
Ca3(GeAs2)2	0.8971806374999931	1.2962634358333291	Ca3(GeAs2)2 + 6 Li -> Li3As + 3 LiCaAs + 2 Ge	0.5 Ca3(GeAs2)2 -> GeAs2 + 1.5 Ca	-0.23473575095238086	-0.48085767551333425	-0.9707610111941645
Ca3(GeP2)2	0.8255355316666579	1.3121045565000102	Ca3(GeP2)2 + 6 Li -> Li3P + 3 LiCaP + 2 Ge	0.75 Ca3(GeP2)2 -> CaP3 + 1.5 Ge + 1.25 Ca	-0.21345314319508502	-0.4633124456632651	-1.3094303528055928
Ca3(PO4)2	1.1730246622055702	3.956595680833322	44.33 Ca3(PO4)2 + 50 Li -> Ca5P8 + 32 Ca4P2O9 + 16.67 Li3PO4	Ca3(PO4)2 -> Ca2P2O7 + 0.5 O2 + Ca	-0.016564608071912623	-0.18161705143332707	-0.0019348600320867604
Ca3(SiAs2)2	0.8303564458333264	1.3330720470833337	Ca3(SiAs2)2 + 6 Li -> Li3As + 3 LiCaAs + 2 Si	0.5 Ca3(SiAs2)2 -> SiAs2 + 1.5 Ca	-0.22805086579300582	-0.4986235528124978	-1.239420528742229
Ca3(SiP2)2	0.6870908387499903	1.3737156504166645	Ca3(SiP2)2 + 6 Li -> Li3P + 3 LiCaP + 2 Si	0.5 Ca3(SiP2)2 -> SiP2 + 1.5 Ca	-0.20975040014592805	-0.4964103699479163	-1.3977652262898594
Ca3Al2(GeO4)3	2.0158979489583793	3.7843731299999943	6 Ca3Al2(GeO4)3 + 8 Li -> LiAl5O8 + 7 LiAlGeO4 + 9 Ca2GeO4 + 2 Ge	2.333 Ca3Al2(GeO4)3 -> Ca2Ge7O16 + 2.333 Al2O3 + 2.5 O2 + 5 Ca	-0.1924562105494001	-0.2556302139772684	-0.0255309590395969
Ca3Al3N5	0.08446994403334784	0.9483158124999932	0.44 Ca3Al3N5 + Li -> LiCaAlN2 + 0.04 Ca8Al3 + 0.2 AlN	Ca3Al3N5 -> CaN2 + 3 AlN + 2 Ca	-0.4228020332894835	-0.6852231101999986	-0.8922005574635028
Ca3AlAs3	0.6937887000000077	1.1549991849999983	0.3333 Ca3AlAs3 + Li -> LiCaAs + 0.3333 Al	Ca3AlAs3 -> CaAs + 0.5 Ca3(AlAs2)2 + 0.5 Ca	-0.29416831320470194	-0.5720356407967979	-1.1001671442763141
Ca3AlN3	0.3852030383333392	0.7850246209374953	Ca3AlN3 + Li -> LiCaAlN2 + Ca2N	2 Ca3AlN3 -> Ca3(AlN2)2 + CaN2 + 2 Ca	-0.5587247056666671	-0.8468670771052627	-0.9658069960954463
Ca3AsBr3	0.020234731458337096	1.2670368514285721	0.3333 Ca3AsBr3 + 1.333 Li -> LiBr + 0.3333 LiCaAs + 0.6667 Ca	3 Ca3AsBr3 -> CaAs3 + 4.5 CaBr2 + 3.5 Ca	-0.223716223504844	-0.392012464933845	-0.6464824468389996
Ca3AsCl3	0.0381213602083359	1.2228190299999948	Ca3AsCl3 + 4 Li -> LiCaAs + 3 LiCl + 2 Ca	Ca3AsCl3 -> CaAs + 1.5 CaCl2 + 0.5 Ca	-0.22960342765738373	-0.3974256503184601	-0.6623285341560736
Ca3AsI3	3.9968028886505635e-15	1.2624302582142806	Li -> Li	3 Ca3AsI3 -> CaAs3 + 4.5 CaI2 + 3.5 Ca	-0.21468322748788937	-0.3928973214723066	-0.6472493225056675
Ca3AsN	0.9974995108333289	1.0177575166666666	Li + CaAs -> LiCaAs	Ca3AsN -> CaAs + 0.5 CaN2 + 1.5 Ca	-0.46853956304901945	-0.770784032890588	-1.0078612404957505
Ca3B4(H4O)3	0.757514373140987	1.3603841950000073	0.375 Ca3B4(H4O)3 + 1.083 Li -> LiBH4 + 0.08333 Li(BH)6 + 1.125 CaO	0.7143 Ca3B4(H4O)3 -> Ca(BH4)2 + 0.4286 Ca2B2O5 + 0.2857 H2 + 0.2857 Ca	-0.0645806680115304	-0.22820027223625106	-0.7989984106961732
Ca3BCBr2N	0.44673363333335203	0.38714814937500125	2 Ca3BCBr2N + 3.5 Li + 5.75 Ca3(BN2)2 -> Ca(BC)2 + 0.25 CaB4 + 4 Ca2BrN + 3.5 LiCa4(BN2)3	4 Ca3BCBr2N -> Ca3(BN2)2 + Ca(BC)2 + 4 CaBr2 + 2 C + 4 Ca	-0.48502658744959604	-0.760280169843754	-0.9536481602067641
Ca3BCNCl2	0.1349311383333549	0.384009606874984	Ca3BCNCl2 + Li -> Ca2NCl + LiBC + 0.5 CaCl2 + 0.5 Ca	4 Ca3BCNCl2 -> Ca(BC)2 + 0.6667 Ca3C3Cl2 + 2 Ca2BN2Cl + 2.333 CaCl2 + 2.667 Ca	-0.4737693379133101	-0.7504368324999984	-0.9548481725751836
Ca3BI3N2	1.1650300945833152	1.2102034062500027	2 Li + 0.5 CaN2 + 3.5 Ca3(BN2)2 -> Ca3BN3 + 2 LiCa4(BN2)3	6 Ca3BI3N2 -> CaN6 + 9 CaI2 + 6 BN + 8 Ca	-0.27093105221153735	-0.536121057352958	-0.56967558124621
Ca3BN3	0.013493119583394275	0.9413748387500008	Ca3BN3 + Li -> Ca2N + 0.25 Li3BN2 + 0.25 LiCa4(BN2)3	2 Ca3BN3 -> CaN2 + Ca3(BN2)2 + 2 Ca	-0.5079418628333379	-0.8068025413157889	-0.8803351703397313
Ca3Be2Si3(HO6)2	1.7607497362500109	3.7201244035416536	Ca3Be2Si3(HO6)2 + 2 Li -> CaSiO3 + Li2BeSiO4 + Ca2SiO4 + BeO + H2	2 Ca3Be2Si3(HO6)2 -> Be4Si2H2O9 + 4 CaSiO3 + O2 + H2O + 2 Ca	-0.05634060272220953	-0.23764747628968586	-0.03499132382863257
Ca3C3Cl2	8.659739592076221e-15	0.4112718612500017	Li -> Li	Ca3C3Cl2 -> CaCl2 + 3 C + 2 Ca	-0.4832108485181479	-0.7587112535937499	-0.9708586233630878
Ca3CdO4	1.6669543833333316	3.3316466074999957	Ca3CdO4 + 2 Li -> Li2O + 3 CaO + Cd	Ca3CdO4 -> CaCdO2 + O2 + 2 Ca	-0.37508776671874955	-0.4659557430000003	-0.1348034497104451
Ca3Co(SeO3)4	2.4170271381112123	3.6936128046874965	1.429 Ca3Co(SeO3)4 + 2.143 Li -> LiCoO2 + 4.286 CaSeO3 + 0.4286 CoSe2 + 0.5714 Li2SeO4	Ca3Co(SeO3)4 -> CaSeO4 + CoSeO3 + CaSe2O5 + Ca	-0.37320797416425844	-0.17788501875000784	-0.11315856502031485
Ca3Cr2(GeO4)3	1.7845361818333443	3.8013796247222373	0.6667 Ca3Cr2(GeO4)3 + 2.222 Li -> Ca2GeO4 + 0.4444 Li2GeO3 + 1.333 LiCrO2 + 0.5556 Ge	2.333 Ca3Cr2(GeO4)3 -> Ca2Ge7O16 + 2 CaCrO4 + 1.333 Cr2O3 + 3 Ca	-1.590145012741472	-0.22203598919643142	-1.721343453161455
Ca3Cr2(SiO4)3	1.7536075691666597	3.5550539883333245	Li + 0.5 Li2Si2O5 + 0.1667 Cr2O3 -> Li2SiO3 + 0.3333 Cr	0.8333 Ca3Cr2(SiO4)3 -> CaCrO4 + 2.5 SiO2 + 0.3333 Cr2O3 + 1.5 Ca	-1.561014582065332	-0.24002725274618975	-1.738381085852041
Ca3Cr3(PO4)4	2.119637322580658	2.5123567674999516	3 Ca3Cr3(PO4)4 + 8.455 Li -> Ca9Cr(PO4)7 + 2.182 CrP + 2.909 Cr2O3 + 2.818 Li3PO4	Ca3Cr3(PO4)4 -> CaCr2P2O9 + CaCrP2O7 + Ca	-2.312797872171954	-0.15814498863838722	-2.0984245364428578
Ca3Er3Ge2BO13	1.6408938390475527	3.593799561250003	0.8 Ca3Er3Ge2BO13 + 1.867 Li -> Ca2GeO4 + 0.4 Li4Ca(BO3)2 + 0.1333 Li2GeO3 + 1.2 Er2O3 + 0.4667 Ge	Ca3Er3Ge2BO13 -> Er2Ge2O7 + ErBO3 + 1.5 O2 + 3 Ca	-0.17160269235745318	-0.31270677858974594	-0.062143809183816234
Ca3Fe2(GeO4)3	2.198307740833364	3.8880094209166565	2 Ca3Fe2(GeO4)3 + 4 Li -> Fe2GeO4 + 3 Ca2GeO4 + 2 Li2FeGeO4	2.333 Ca3Fe2(GeO4)3 -> Ca2Ge7O16 + 2.333 Fe2O3 + 2.5 O2 + 5 Ca	-0.2543367608995948	-0.1780249305980388	-0.023573453907408393
Ca3Fe2(SeO3)6	2.884525434696908	3.8762812720833217	0.3333 Ca3Fe2(SeO3)6 + 0.4583 Li -> CaSeO3 + 0.4583 LiFe(SeO3)2 + 0.04167 FeSe2 + 0.08333 Fe2O3	1.333 Ca3Fe2(SeO3)6 -> Fe2(Se2O5)3 + 2 CaSeO4 + 0.3333 Fe2O3 + 2 Ca	-0.42294320064680146	-0.1413952563823555	-0.1399820371448124
Ca3Fe2(SiO4)3	2.3769982989583247	3.74207629041667	Ca3Fe2(SiO4)3 + 2 Li -> Li2FeSiO4 + 0.5 Fe2SiO4 + 1.5 Ca2SiO4	Ca3Fe2(SiO4)3 -> Fe2O3 + 3 SiO2 + 1.5 O2 + 3 Ca	-0.16987633082031373	-0.2000317355833352	-0.03138195552537226
Ca3Ga2(GeO4)3	2.12574644124994	3.7381210050000404	0.5 Ca3Ga2(GeO4)3 + Li -> CaGeO3 + 0.25 Ca2GeO4 + LiGaO2 + 0.25 Ge	1.333 Ca3Ga2(GeO4)3 -> Ca3Ga2(Ge2O7)2 + 0.3333 Ga2O3 + 0.5 O2 + Ca	-0.23889680831340243	-0.21876003941965472	-0.026077896643723175
Ca3Ga2Si(SnO6)2	2.0097179883334606	3.757753813749997	0.5 Ca3Ga2Si(SnO6)2 + 0.5 Li + 1.25 Li2SiO3 + 0.75 CaSiO3 -> Li3GaSiO5 + 0.75 Ca3Si2SnO9 + 0.25 SnO	0.5 Ca3Ga2Si(SnO6)2 -> SnO2 + 0.5 Ga2O3 + 0.5 SiO2 + 0.75 O2 + 1.5 Ca	-0.2172792770451606	-0.24766876587500475	-0.028148866014453766
Ca3Ga4O9	1.520120693888894	3.450733715833332	0.3333 Ca3Ga4O9 + Li -> LiGaO2 + CaO + 0.3333 Ga	Ca3Ga4O9 -> CaGa4O7 + O2 + 2 Ca	-0.266861720104163	-0.2906816459226169	-0.06924637247759646
Ca3GaN3	0.36242776458333736	0.8998136962500042	9 Ca3GaN3 + 4 Li -> Ca5(GaN2)2 + 4 LiCaGaN2 + 3 Ca6GaN5	2 Ca3GaN3 -> Ca3(GaN2)2 + CaN2 + 2 Ca	-0.5384709708333313	-0.8310099492105265	-0.8857896775830358
Ca3Ge3(MoO6)2	1.9190140930555746	2.7264393910226876	1.667 Ca3Ge3(MoO6)2 + 6 Li -> CaMoO3 + 2 Ca2GeO4 + 3 Li2GeO3 + 2.333 Mo	2.333 Ca3Ge3(MoO6)2 -> Ca2Ge7O16 + 1.333 CaMoO4 + 3.333 MoO2 + 3.667 Ca	-0.28708099385416386	-0.2240107959374935	-0.2078962241176443
Ca3Ge3(RhO6)2	2.9808641316667472	2.9824838594166723	0.6667 Ca3Ge3(RhO6)2 + Li -> LiGeRhO4 + Ca2GeO4 + 0.3333 Rh	0.625 Ca3Ge3(RhO6)2 -> CaGeO3 + 0.125 Ca2Ge7O16 + 1.25 RhO2 + 0.625 Ca	-0.34760069428977447	-0.211286370789475	-0.07386502033783149
Ca3Hf2AlFeSiO12	2.162612482083268	3.613593000999985	2 Ca3Hf2AlFeSiO12 + 2 Li -> Ca3HfSi2O9 + 2 FeO + 2 LiAlO2 + 3 CaHfO3	2 Ca3Hf2AlFeSiO12 -> CaAl2(SiO4)2 + Fe2O3 + 4 HfO2 + 2.5 O2 + 5 Ca	-0.14746790099760254	-0.2750128895592918	-0.04998511367297187
Ca3Hf2Fe2SiO12	2.2277511408334334	3.5660818408333443	2 Ca3Hf2Fe2SiO12 + 2 Li -> Li2FeSiO4 + Ca2SiO4 + FeO + Fe2O3 + 4 CaHfO3	2 Ca3Hf2Fe2SiO12 -> Ca3HfSi2O9 + 2 Fe2O3 + 3 HfO2 + 1.5 O2 + 3 Ca	-0.19430796554689245	-0.23613715101325372	-0.04875265058752909
Ca3Hf3AgF20	3.773611195833257	6.329879553194438	Ca3Hf3AgF20 + 2 Li -> Li2CaHfF8 + 2 HfF4 + 2 CaF2 + Ag	Ca3Hf3AgF20 -> AgF3 + 3 HfF4 + 2.5 F2 + 3 Ca	-0.10907396714083983	-0.016317819629647623	-0.09147895787147453
Ca3HfSi2O9	0.9248149583333494	3.6134147091666793	1.5 Ca3HfSi2O9 + 2 Li -> Li2SiO3 + 1.5 Ca2SiO4 + 1.5 CaHfO3 + 0.5 Si	0.5 Ca3HfSi2O9 -> CaSiO3 + 0.5 HfO2 + 0.25 O2 + 0.5 Ca	-0.08502300419642506	-0.28276134397619623	-0.042795562723571656
Ca3In2(GeO4)3	1.9247789200000263	3.765795861315783	0.6667 Ca3In2(GeO4)3 + 2 Li -> Ca2GeO4 + Li2GeO3 + 0.3333 In2O3 + 0.6667 In	7 Ca3In2(GeO4)3 -> Ca2Ge7O16 + 7 In2Ge2O7 + 9.5 O2 + 19 Ca	-0.25004790962021195	-0.22621782424108394	-0.028433938464831776
Ca3InP3	0.871296728333338	1.0384766466666429	0.3333 Ca3InP3 + Li -> LiCaP + 0.3333 In	2 Ca3InP3 -> Ca(InP)2 + 4 CaP + Ca	-0.29241095262236305	-0.5544865673154895	-1.301857205059513
Ca3La3(BO3)5	0.9787319185715	3.5439205324999894	1.431 Ca3La3(BO3)5 + 1.167 Li -> Ca4LaB3O10 + 0.2917 Li4Ca(BO3)2 + 3.236 LaBO3 + 0.05556 LaB6	Ca3La3(BO3)5 -> Ca2B2O5 + 3 LaBO3 + 0.5 O2 + Ca	-0.08396173465457135	-0.30242048014884615	-0.06924635870838713
Ca3Lu2(GeO4)3	1.7658075139583205	3.6811389939583594	0.6667 Ca3Lu2(GeO4)3 + 1.333 Li -> Ca2GeO4 + 0.6667 Li2GeO3 + 0.6667 Lu2O3 + 0.3333 Ge	Ca3Lu2(GeO4)3 -> CaGeO3 + Lu2Ge2O7 + O2 + 2 Ca	-0.19183535587500655	-0.263801388428031	-0.04629635345980798
Ca3Mn2(GeO4)3	2.6770098345833055	3.565992896305539	Ca3Mn2(GeO4)3 + 2 Li -> CaMnGeO4 + Li2MnGeO4 + Ca2GeO4	1.633 Ca3Mn2(GeO4)3 -> Ca2Mn3O8 + 0.1333 Mn2O3 + 0.7 Ca2Ge7O16 + 1.5 Ca	-0.25489889818557643	-0.22555231339282722	-0.05386494345247517
Ca3Mn3(AsO4)4	2.5859557954762664	3.082244314166914	0.75 Ca3Mn3(AsO4)4 + Li -> LiMnAsO4 + 0.25 Mn(AsO2)2 + MnO + 0.75 Ca3(AsO4)2	0.6667 Ca3Mn3(AsO4)4 -> Mn2AsO5 + 0.6667 Ca2As2O7 + 0.1667 Ca(AsO3)2 + 0.5 Ca	-0.2870431513213485	-0.1950212772355553	-0.12664115531191422
Ca3N2	0.2667029658333373	0.7818647043750004	Ca3N2 + Li -> LiCaN + Ca2N	Ca3N2 -> CaN2 + 2 Ca	-0.6691619809615421	-0.9652107912500052	-1.056015821023761
Ca3Nb2CoO9	2.1383213783333295	3.0672673200000053	1.333 Ca3Nb2CoO9 + 2 Li -> Ca4Nb2O9 + 0.6667 Li3NbO4 + Co + 0.3333 CoO	3 Ca3Nb2CoO9 -> Ca4Nb2O9 + Co3O4 + 2 Ca2Nb2O7 + Ca	-0.20504678463706671	-0.2912186802016148	-0.05340533462197161
Ca3PCl3	0.009722349583331624	1.2167027000000028	Ca3PCl3 + 8 Li -> LiCaP + 2 Li2Ca + 3 LiCl	8 Ca3PCl3 -> Ca5P8 + 12 CaCl2 + 7 Ca	-0.2239165574394666	-0.3928203413074711	-0.9247800978809533
Ca3PI3	3.552713678800501e-15	1.1971633185714246	Li -> Li	8 Ca3PI3 -> Ca5P8 + 12 CaI2 + 7 Ca	-0.21692322464285674	-0.44087529616666443	-0.9156339375793656
Ca3PN	0.27543299833329654	0.594233189666667	Ca3PN + Li -> Ca2N + LiCaP	3 Ca3PN -> Ca2PN3 + 2 CaP + 5 Ca	-0.5076819391325644	-0.795056705843828	-1.2474381923288669
Ca3Sc2(GeO4)3	1.7141762327083974	3.7955353399509586	Ca3Sc2(GeO4)3 + 2 Li -> Li2GeO3 + 1.5 Ca2GeO4 + Sc2O3 + 0.5 Ge	Ca3Sc2(GeO4)3 -> Sc2GeO5 + 0.2857 Ca2Ge7O16 + 1.214 O2 + 2.429 Ca	-0.1819025502796121	-0.25992779062499904	-0.023082551000946694
Ca3Sc2(SiO4)3	0.8610543858333357	3.755712906666662	0.6667 Ca3Sc2(SiO4)3 + 2 Li -> Ca2SiO4 + 0.5 Li4SiO4 + 0.6667 Sc2O3 + 0.5 Si	Ca3Sc2(SiO4)3 -> Sc2Si2O7 + SiO2 + 1.5 O2 + 3 Ca	-0.05943952087890203	-0.2801332513068169	-0.028395753568857707
Ca3ScCoO6	2.561863515833247	3.3648580441667053	2 Ca3ScCoO6 + Li -> LiCoO2 + CaSc2O4 + 5 CaO + CoO	3 Ca3ScCoO6 -> Ca2Co3O8 + 1.5 CaSc2O4 + 4 CaO + 1.5 Ca	-0.33359545723436934	-0.4164373374137744	-0.13543265018480533
Ca3Si(ClO2)2	0.5657818839583255	3.5541343441666604	2 Ca3Si(ClO2)2 + 4 Li -> Ca2SiO4 + 4 CaO + 4 LiCl + Si	Ca3Si(ClO2)2 -> CaSiO3 + 0.1667 Ca(ClO3)2 + 0.8333 CaCl2 + Ca	-0.09224479375000172	-0.2786169527272726	-0.06368167427695859
Ca3Si2SnO9	1.9828846930833075	3.6036424566666727	8 Ca3Si2SnO9 + 10 Li -> Ca2Sn3O8 + 5 Li2SiO3 + 11 Ca2SiO4 + 5 SnO	0.5 Ca3Si2SnO9 -> CaSiO3 + 0.5 SnO2 + 0.25 O2 + 0.5 Ca	-0.1529347830750023	-0.2733836285	-0.04150944296740189
Ca3Si3(MoO6)2	1.920626030625011	2.6285842066666345	0.6667 Ca3Si3(MoO6)2 + 4 Li -> Ca2SiO4 + Li4SiO4 + 1.333 Mo	0.5 Ca3Si3(MoO6)2 -> CaSiO3 + 0.5 SiO2 + MoO2 + 0.5 Ca	-0.20120956899539078	-0.24279415147726802	-0.21173086861110946
Ca3Ta4(O6F)2	1.0951711265001252	4.015065930000014	0.6333 Ca3Ta4(O6F)2 + 2 Li -> Li2CaTa2O7 + 0.06667 Ca4Ta2O9 + 0.6333 CaF2 + 0.4 Ta	Ca3Ta4(O6F)2 -> CaTa4O11 + CaF2 + 0.5 O2 + Ca	-0.044791487592596546	-0.216581730618278	-0.015171835525814803
Ca3TaGa3(SiO7)2	1.9965447847224758	3.730411560833226	2 Ca3TaGa3(SiO7)2 + 0.375 Li -> CaGa4O7 + 0.375 LiGa5O8 + CaTa2O6 + 4 CaSiO3 + 0.125 Ga	2 Ca3TaGa3(SiO7)2 -> CaTa2O6 + 4 CaSiO3 + 3 Ga2O3 + 0.5 O2 + Ca	-0.16330908792230758	-0.23266588782566	-0.02698731246582664
Ca3TeO6	3.8436217933333623	3.639107305000001	Li + 4 O2 -> LiO8	Ca3TeO6 -> CaTeO4 + O2 + 2 Ca	-0.2788133244824187	-0.30018411477273466	-0.0698886765100335
Ca3Ti3Cr2O12	1.487194996666691	3.4508626841666596	0.3333 Ca3Ti3Cr2O12 + 0.5 Li -> CaTiO3 + 0.5 LiCrO2 + 0.1667 Cr	0.8333 Ca3Ti3Cr2O12 -> CaCrO4 + 0.3333 Cr2O3 + 2.5 TiO2 + 1.5 Ca	-1.50165612170452	-0.2815544485171495	-1.7128586397916536
Ca3TiBe2Si2(As3O10)2	2.223454295208283	3.101198923541697	Ca3TiBe2Si2(As3O10)2 + 8 Li -> BeO + 2 Li3AsO4 + Ca2SiO4 + Li2BeSiO4 + CaTiO3 + 4 As	Ca3TiBe2Si2(As3O10)2 -> Ca(AsO3)2 + Be2SiO4 + SiO2 + TiO2 + 2 As2O3 + 2 Ca	-0.17806306239941883	-0.21418805720319067	-0.21121139843058945
Ca3Tl2O6	2.4202787265833354	3.3415726633333285	2.6 Ca3Tl2O6 + 6 Li -> Tl4O3 + 1.2 Li5TlO4 + 7.8 CaO	Ca3Tl2O6 -> Tl2O3 + 1.5 O2 + 3 Ca	-0.46448653973684895	-0.4035250131521657	-0.1464697018725607
Ca3Tm2(GeO4)3	1.8183544783333283	3.627537830833354	0.6667 Ca3Tm2(GeO4)3 + 1.333 Li -> Ca2GeO4 + 0.6667 Li2GeO3 + 0.6667 Tm2O3 + 0.3333 Ge	Ca3Tm2(GeO4)3 -> CaGeO3 + Tm2Ge2O7 + O2 + 2 Ca	-0.19787906868749205	-0.23577393312499773	-0.05350045656123692
Ca3V2O8	1.8899125889285742	3.589091242857097	2 Ca3V2O8 + 6 Li -> Li3VO4 + 3 LiVO2 + 6 CaO	Ca3V2O8 -> Ca2V2O7 + 0.5 O2 + Ca	-0.27778290588054055	-0.2440316368714095	-0.038796271868724475
Ca3VN3	0.0	0.3276638674999874	Li -> Li	Ca3VN3 -> Ca2VN3 + Ca	-0.5027601071666634	-0.8029996497368437	-0.8237551797843694
Ca3WCl2O5	1.9758297783332952	3.6812604345833524	1.2 Ca3WCl2O5 + 1.2 Li -> Ca3WO6 + 0.6 CaCl2 + 1.2 LiCl + 0.2 W	Ca3WCl2O5 -> CaWO4 + 0.1667 Ca(ClO3)2 + 0.8333 CaCl2 + Ca	-0.25773632818850034	-0.26714097818840976	-0.053162011916647156
Ca3WO6	1.2712296045833362	3.627084957500018	1.667 Ca3WO6 + 4 Li -> Li4WO5 + 5 CaO + 0.6667 W	Ca3WO6 -> CaWO4 + O2 + 2 Ca	-0.285940403156248	-0.32644280238635437	-0.05703206234761016
Ca3Zn3(TeO6)2	2.2916758783333844	3.962683169791657	Ca3Zn3(TeO6)2 + 2 Li -> Ca3TeO6 + Li2TeO3 + 3 ZnO	Ca3Zn3(TeO6)2 -> Zn3TeO6 + CaTeO4 + O2 + 2 Ca	-0.33516197807477965	-0.20538478798912507	-0.0298120115671896
Ca3Zr2AlFeSiO12	2.2904761583333517	3.5164827199999804	Ca3Zr2AlFeSiO12 + Li -> CaZrO3 + FeO + Ca2SiO4 + LiAlO2 + ZrO2	4 Ca3Zr2AlFeSiO12 -> CaAl4O7 + 4 Ca2SiO4 + 2 Fe2O3 + 8 ZrO2 + 1.5 O2 + 3 Ca	-0.15188908780288735	-0.293784016850962	-0.053492602277639634
Ca3ZrSi2O9	1.0229263470833463	3.5936896829166565	2.5 Ca3ZrSi2O9 + 2 Li -> Li2SiO3 + 3.75 Ca2SiO4 + 2.25 ZrO2 + 0.25 ZrSi	0.5 Ca3ZrSi2O9 -> CaSiO3 + 0.5 ZrO2 + 0.25 O2 + 0.5 Ca	-0.08873004312504129	-0.2977349214285736	-0.045295946737492265
Ca4Al6CrO16	3.05987960527775	3.416986453333335	3.333 Ca4Al6CrO16 + 6 Li -> CaCr2O4 + Ca11Al14O32 + 1.333 CaCrO4 + 6 LiAlO2	0.6667 Ca4Al6CrO16 -> CaAl4O7 + 0.6667 CaCrO4 + 0.5 O2 + Ca	-1.1313199988129679	-0.3158884725284836	-1.0672587213415508
Ca4Al6MoO16	2.2290066895833753	3.4432977116666574	15 Ca4Al6MoO16 + 30 Li -> CaAl4O7 + 4 Ca11Al14O32 + 15 CaMoO3 + 30 LiAlO2	0.6667 Ca4Al6MoO16 -> CaAl4O7 + 0.6667 CaMoO4 + 0.5 O2 + Ca	-0.19282673539900497	-0.3184221002373513	-0.05429384278167859
Ca4Al6SO12	0.5919702581666222	2.3022445391666673	2.167 Ca4Al6SO12 + 5 Li -> Ca6Al7O16 + 5 LiAlO2 + 0.5 CaAl2 + 2.167 CaS	3.667 Ca4Al6SO12 -> Ca4Al6SO16 + 4 CaAl4O7 + 2.667 CaS + 4 Ca	-0.0832918295689753	-0.3371060070666685	-0.25976606281999803
Ca4Al6SO16	2.073501913541694	3.554081313333338	0.3333 Ca4Al6SO16 + 2 Li -> CaO + 2 LiAlO2 + 0.08333 CaSO4 + 0.25 CaS	Ca4Al6SO16 -> CaSO4 + 1.5 CaAl4O7 + 0.75 O2 + 1.5 Ca	-0.10930616531164716	-0.3091767748333494	-0.045797104297509605
Ca4Al6TeO12	0.5072183462500095	2.310810029625015	0.2083 Ca4Al6TeO12 + Li -> LiAlO2 + 0.5 CaO + 0.125 CaAl2 + 0.2083 CaTe	0.6667 Ca4Al6TeO12 -> CaAl4O7 + 0.3333 CaTeO3 + 0.3333 Te + 1.333 Ca	-0.0882840011635917	-0.3370260452368008	-0.2421811087093264
Ca4As2O	0.1372516758333302	1.032247835000005	0.5 Ca4As2O + Li -> LiCaAs + 0.5 CaO + 0.5 Ca	0.5 Ca4As2O -> CaAs + 0.5 CaO + 0.5 Ca	-0.3424747741931762	-0.6018657326426124	-0.8945166580761721
Ca4CN4	0.2667029658333284	0.8169401156249965	Li + Ca3N2 -> LiCaN + Ca2N	Ca4CN4 -> CaN2 + CaCN2 + 2 Ca	-0.5149383166176551	-0.7791404024000013	-0.8211367209517002
Ca4Cl6O	0.06573968749999937	3.289865738333339	0.1667 Ca4Cl6O + Li -> LiCl + 0.1667 CaO + 0.5 Ca	6 Ca4Cl6O -> Ca(ClO3)2 + 17 CaCl2 + 6 Ca	-0.10112829807692059	-0.21957870176470617	-0.07706454629629267
Ca4ErB3O10	0.6600140750832395	3.5303420837499795	1.8 Ca4ErB3O10 + Li -> LiCaBO3 + 0.05 CaB6 + 2.05 Ca3(BO3)2 + 0.9 Er2O3	Ca4ErB3O10 -> Ca2B2O5 + ErBO3 + O2 + 2 Ca	-0.11016134522435461	-0.32524551931250256	-0.055151291015856696
Ca4GdB3O10	0.6370043861110966	3.5422315445833137	1.022 Ca4GdB3O10 + 4 Li -> Li4Ca(BO3)2 + 0.3778 Gd2O3 + 3.089 CaO + 0.2667 GdB4	Ca4GdB3O10 -> Ca2B2O5 + GdBO3 + O2 + 2 Ca	-0.10895394556056637	-0.3098080546565871	-0.0544896864548714
Ca4GeN4	0.3056484370833352	0.9899949631250006	0.5 Ca4GeN4 + Li -> LiCaN + 0.5 Ca2GeN2	Ca4GeN4 -> CaN2 + CaGeN2 + 2 Ca	-0.5030258927302631	-0.7972191431666711	-0.8736652347271985
Ca4HfN4	0.11178362333330938	0.8205945400000078	Ca4HfN4 + Li -> Ca2N + CaHfN2 + LiCaN	Ca4HfN4 -> CaN2 + CaHfN2 + 2 Ca	-0.5218372087711702	-0.8216911493666679	-0.9505607221081651
Ca4LaB3O10	0.6352309160863099	3.5177093090000056	1.048 Ca4LaB3O10 + 4 Li -> Li4Ca(BO3)2 + 0.1905 LaB6 + 3.19 CaO + 0.4286 La2O3	3 Ca4LaB3O10 -> Ca3La3(BO3)5 + 2 Ca2B2O5 + 2.5 O2 + 5 Ca	-0.11806341960656308	-0.33394924810416793	-0.059107713897774694
Ca4Mg4Fe3H22	0.47643240266445286	1.0048025699999086	0.5 Ca4Mg4Fe3H22 + 2.007 Li -> Ca2FeH6 + 0.006711 LiMg149 + 0.5 Mg2FeH6 + 2 LiH	0.5 Ca4Mg4Fe3H22 -> Ca2FeH6 + 0.5 Mg2FeH6 + H2 + Mg	-0.17947097203685924	-0.36378552720461355	-1.8307972566704946
Ca4Mn3B3CO15	2.9198425542709074	3.384424644444384	0.5 Li + 0.25 Li2B4O7 + 0.75 Mn2O3 -> LiBO2 + 0.5 Mn3O4	0.6667 Ca4Mn3B3CO15 -> Ca(BO2)2 + 0.6667 CaCO3 + 0.5714 Mn2O3 + 0.2857 Ca2Mn3O8 + 0.4286 Ca	-0.202984467332457	-0.23216537204329013	-0.06129632021381859
Ca4Nb2O9	1.1418432716145475	3.452198288750009	5 Ca4Nb2O9 + 16 Li -> Li8Nb2O9 + 8 LiNbO2 + 20 CaO	Ca4Nb2O9 -> Ca2Nb2O7 + O2 + 2 Ca	-0.18357644649416338	-0.3381203648790332	-0.072065433910665
Ca4NdB3O10	0.6272395403471909	3.5292853493749843	1.022 Ca4NdB3O10 + 4 Li -> Li4Ca(BO3)2 + 3.089 CaO + 0.3778 Nd2O3 + 0.2667 NdB4	Ca4NdB3O10 -> Ca2B2O5 + O2 + NdBO3 + 2 Ca	-0.11522691348583702	-0.33277863447916944	-0.05764502258567061
Ca4P2O	0.20782572333333293	0.8823177083333337	0.5 Ca4P2O + Li -> LiCaP + 0.5 CaO + 0.5 Ca	0.5 Ca4P2O -> CaP + 0.5 CaO + 0.5 Ca	-0.3621559517797617	-0.6217226944963523	-1.2263464492339566
Ca4P2O9	1.1327945510333706	3.342201765416643	12.33 Ca4P2O9 + 50 Li -> Ca5P8 + 16.67 Li3PO4 + 44.33 CaO	Ca4P2O9 -> Ca3(PO4)2 + 0.5 O2 + Ca	-0.07756190011029052	-0.24690391120967758	-0.05334268340368897
Ca4P6O19	2.5874080901667376	4.38126408312503	0.6 Ca4P6O19 + Li -> LiPO3 + 1.2 Ca2P2O7 + 0.2 P	0.3333 Ca4P6O19 -> Ca(PO3)2 + 0.1667 O2 + 0.3333 Ca	-0.03372038933769517	-0.14330205668238527	-0.08754222160829928
Ca4PdO6	2.8319088800000216	3.4191264156250027	6 Ca4PdO6 + 6 Li -> CaPd3O4 + 3 Li2PdO3 + 23 CaO	Ca4PdO6 -> PdO2 + 2 O2 + 4 Ca	-0.45527161413690465	-0.43579334462962827	-0.16338131078617746
Ca4Si2O7F2	0.8026048652082849	3.664128546666695	0.5714 Ca4Si2O7F2 + 0.5714 Li -> Ca2SiO4 + 0.5714 LiF + 0.2857 CaF2 + 0.1429 Si	0.5 Ca4Si2O7F2 -> CaSiO3 + 0.5 CaF2 + 0.25 O2 + 0.5 Ca	-0.07675764836308563	-0.26177470814814985	-0.05124074186276184
Ca4Si6Pb6Cl2O21	2.0670616163889157	3.5397525026562286	2 Ca4Si6Pb6Cl2O21 + 6 Li -> Ca2Si3Pb3O11 + 2 Pb3(ClO)2 + 6 CaSiO3 + 3 Li2SiO3 + 3 Pb	2 Ca4Si6Pb6Cl2O21 -> SiPb4(ClO)4 + 8 PbO2 + 11 SiO2 + 8 Ca	-0.17373600637062747	-0.2524449574066656	-0.0722466403035118
Ca4SiN4	0.12192053958334448	0.8525308600000133	4 Ca4SiN4 + 4 Li -> Ca5(SiN3)2 + Li4Ca3(SiN3)2 + 4 Ca2N	2 Ca4SiN4 -> CaN2 + Ca5(SiN3)2 + 2 Ca	-0.5127300987828445	-0.8048215028333385	-0.928328865067348
Ca4SiP4	0.7572539861458634	1.1518880410000072	0.25 Ca4SiP4 + Li -> LiCaP + 0.25 Si	4 Ca4SiP4 -> Ca5P8 + 2 Ca3(SiP2)2 + 5 Ca	-0.26713250501801955	-0.587100225699998	-1.3737955096641772
Ca4SmB3O10	0.6266688013680288	3.545784538124981	1.022 Ca4SmB3O10 + 4 Li -> Li4Ca(BO3)2 + 3.089 CaO + 0.3778 Sm2O3 + 0.2667 SmB4	Ca4SmB3O10 -> Ca2B2O5 + O2 + SmBO3 + 2 Ca	-0.11084890105027423	-0.3310956010625028	-0.05644268373537953
Ca4Ta2O9	0.7100650548333602	3.5037597092857413	0.8 Ca4Ta2O9 + 3 Li -> Li3TaO4 + 3.2 CaO + 0.6 Ta	Ca4Ta2O9 -> Ca2Ta2O7 + O2 + 2 Ca	-0.13513702693452867	-0.3242792521392208	-0.07000575425379552
Ca4TiN4	0.0	1.0263204000000004	Li -> Li	Ca4TiN4 -> CaN2 + CaTiN2 + 2 Ca	-0.5005623822035132	-0.8039358102349352	-0.9023500969040801
Ca4YB3O10	0.6381242699166441	3.5381326766666463	1.067 Ca4YB3O10 + 4 Li -> Li4Ca(BO3)2 + 0.2 CaB6 + 3.067 CaO + 0.5333 Y2O3	Ca4YB3O10 -> Ca2B2O5 + YBO3 + O2 + 2 Ca	-0.10913283362178205	-0.32465732075000187	-0.05483387934959083
Ca4ZrN4	0.11204787333332433	0.8205284775000058	Ca4ZrN4 + Li -> Ca2N + CaZrN2 + LiCaN	Ca4ZrN4 -> CaN2 + CaZrN2 + 2 Ca	-0.5218983520338836	-0.8217665222333363	-0.9353853696081629
Ca5(ReO6)2	1.918617381500097	3.67140605054166	2.2 Ca5(ReO6)2 + 2 Li -> Ca11(ReO6)4 + 0.4 Li5ReO6	Ca5(ReO6)2 -> Re2O7 + 2.5 O2 + 5 Ca	-0.31256531855292735	-0.31562371547009027	-0.08482592806695699
Ca5(SiN3)2	0.02798024367423846	1.0619395812500112	1.182 Ca5(SiN3)2 + 4 Li -> Li4Ca3(SiN3)2 + 1.091 Ca2N + 0.3636 Ca2Si	3 Ca5(SiN3)2 -> CaN6 + 6 CaSiN2 + 8 Ca	-0.4426908044499802	-0.7307735138383888	-0.891247594624883
Ca51W12N56O3	0.5940777812499851	0.9686895534615346	0.04167 Ca51W12N56O3 + 2 Li -> Ca2N + 0.3333 Li6WN4 + 0.125 CaO + 0.1667 W	0.1 Ca51W12N56O3 -> CaN2 + 1.2 CaWN3 + 0.3 CaO + 2.6 Ca	-0.4830912038796864	-0.7741777199572364	-0.8049073254648262
Ca5Al2(SiN4)2	0.08708967742422757	1.078624211562505	1.5 Ca5Al2(SiN4)2 + 7.333 Li -> Li4Ca3(SiN3)2 + 2.833 LiCaAlN2 + 0.1667 Li3AlN2 + 0.3333 Ca5Si3	0.5 Ca5Al2(SiN4)2 -> CaSiN2 + 0.1667 CaN6 + AlN + 1.333 Ca	-0.3785609258189333	-0.6553030886242608	-0.8734948880567832
Ca5As3ClO12	1.866164539666646	3.853583745833327	Ca5As3ClO12 + 3.75 Li -> Ca2AsClO4 + 1.25 Li3AsO4 + 3 CaO + 0.75 As	0.6667 Ca5As3ClO12 -> Ca(AsO3)2 + 0.3333 Ca(ClO3)2 + 2 Ca	-0.2235636030357182	-0.20174256709183425	-0.018793156766696573
Ca5As3HO13	1.8765964070000036	3.819532710892859	2 Ca5As3HO13 + 11.25 Li -> Ca(HO)2 + 3.75 Li3AsO4 + 9 CaO + 2.25 As	0.6667 Ca5As3HO13 -> Ca(AsO3)2 + 1.167 O2 + 0.3333 H2O + 2.333 Ca	-0.22641131805531023	-0.21261171954544844	-0.02479559452087665
Ca5As3O12F	1.8890470398888826	3.8602416666666737	0.5333 Ca5As3O12F + 3 Li -> Li3AsO4 + 2.4 CaO + 0.2667 CaF2 + 0.6 As	0.6667 Ca5As3O12F -> Ca(AsO3)2 + 0.3333 CaF2 + O2 + 2 Ca	-0.22752725213815328	-0.19800832528628298	-0.025526892622947717
Ca5B3O9F	0.6018140857975975	3.585766991666662	1.185 Ca5B3O9F + 5.185 Li -> Li4Ca(BO3)2 + 0.2593 CaB6 + 1.185 LiF + 4.667 CaO	0.6667 Ca5B3O9F -> Ca2B2O5 + 0.3333 CaF2 + 0.5 O2 + Ca	-0.1000259362534619	-0.3050183941668019	-0.05988594060984509
Ca5Bi6(Cl3O2)4	2.07949597500002	3.5929672308333136	0.25 Ca5Bi6(Cl3O2)4 + 1.5 Li -> CaBiClO2 + 0.25 CaCl2 + 1.5 LiCl + 0.5 Bi	3 Ca5Bi6(Cl3O2)4 -> Ca(ClO3)2 + 8 CaCl2 + 18 BiClO + 6 Ca	-0.2021075696808472	-0.22705642145568872	-0.05634307586633702
Ca5Co3(SiO4)4	2.408171432916674	3.031781718333298	0.6667 Ca5Co3(SiO4)4 + 2 Li -> Li2CoSiO4 + 1.667 Ca2SiO4 + Co	0.25 Ca5Co3(SiO4)4 -> CaSiO3 + 0.25 Co3O4 + 0.25 Ca	-0.18331800196021675	-0.2747139850000022	-0.06564772337662461
Ca5NbN5	0.019320536547614342	1.0560980346874953	1.75 Ca5NbN5 + 7 Li -> Li7NbN4 + 4.375 Ca2N + 0.375 Nb2N	Ca5NbN5 -> Ca2NbN3 + 0.3333 CaN6 + 2.667 Ca	-0.4898389608152023	-0.7919608427491247	-0.8821032761153842
Ca5P3ClO12	1.0849875336832842	4.061062350208397	12.33 Ca5P3ClO12 + 50 Li -> Ca5P8 + 16.67 Li3PO4 + 12.33 Ca2PClO4 + 32 CaO	1.667 Ca5P3ClO12 -> Ca2PClO4 + 0.3333 Ca(ClO3)2 + 2 Ca2P2O7 + 2 Ca	-0.006454632486780021	-0.16774090195060154	-0.02159904962885051
Ca5P3HO13	1.0783770086345537	4.001154876250021	0.4458 Ca5P3HO13 + 3 Li -> Li3PO4 + 0.04217 Ca5P8 + 1.795 CaO + 0.2229 CaH2	Ca5P3HO13 -> CaPHO4 + Ca2P2O7 + O2 + 2 Ca	-0.01407026222683605	-0.1828669573863646	-1.654501666165601e-14
Ca5P3O12F	1.0370980679999993	4.17326119125003	8.222 Ca5P3O12F + 50 Li -> Ca5P8 + 16.67 Li3PO4 + 32 CaO + 4.111 CaF2	2 Ca5P3O12F -> CaF2 + 3 Ca2P2O7 + 1.5 O2 + 3 Ca	-0.0014561727728552576	-0.163511901144064	-3.196673912702381e-14
Ca5P8	0.8646955129761906	1.262406325714284	0.3333 Ca5P8 + 4.667 Li -> Li3P + 1.667 LiCaP	0.375 Ca5P8 -> CaP3 + 0.875 Ca	-0.23350548721674613	-0.49254238686840024	-1.3516802300231354
Ca5Si(PO6)2	1.102764981033296	3.6451819975000017	Ca5Si(PO6)2 + 4.054 Li -> Ca2SiO4 + 0.08108 Ca5P8 + 1.351 Li3PO4 + 2.595 CaO	Ca5Si(PO6)2 -> CaSiO3 + Ca3(PO4)2 + 0.5 O2 + Ca	-0.050169533906252006	-0.23437834168269278	-0.030473348578896164
Ca5V3ClO12	1.7471563599999804	3.779299259791668	2 Ca5V3ClO12 + 6 Li -> Li3VO4 + 2 Ca2VClO4 + 3 LiVO2 + 6 CaO	0.8333 Ca5V3ClO12 -> Ca2V2O7 + 0.5 Ca2VClO4 + 0.1667 Ca(ClO3)2 + Ca	-0.2526466808333354	-0.22731395579412395	-0.0293115694444519
Ca5V3O12F	1.7757429819444375	3.7603456533333546	1.333 Ca5V3O12F + 6 Li -> Li3VO4 + 3 LiVO2 + 6 CaO + 0.6667 CaF2	0.6667 Ca5V3O12F -> Ca2V2O7 + 0.3333 CaF2 + 0.5 O2 + Ca	-0.2571065149861105	-0.2237063444531211	-0.04198551605263923
Ca5VN5	0.02610840976192108	0.9822518031250034	1.667 Ca5VN5 + 4.667 Li -> Ca3VN3 + 2.667 Ca2N + 0.6667 Li7VN4	Ca5VN5 -> CaN2 + Ca2VN3 + 2 Ca	-0.4659648611849252	-0.778412966185376	-0.7936951858445869
Ca6Al7ClO16	0.41384647138022945	3.5307460233333243	1.25 Ca6Al7ClO16 + 8 Li -> CaAl2 + 6.75 LiAlO2 + 6.5 CaO + 1.25 LiCl	10 Ca6Al7ClO16 -> Ca11Al14O32 + 14 CaAl4O7 + 5 Ca(ClO3)2 + 30 Ca	-0.11493793523988671	-0.3487492466666726	-0.07276422097115409
Ca6Al7O16F	0.5094657117261903	3.4650234976666727	0.1786 Ca6Al7O16F + Li -> LiAlO2 + 0.125 CaAl2 + 0.8571 CaO + 0.08929 CaF2	0.5714 Ca6Al7O16F -> CaAl4O7 + 0.2857 CaF2 + 1.071 O2 + 2.143 Ca	-0.12814959765994605	-0.35338280851064097	-0.0850591963231686
Ca6Fe(CoO4)3	2.9336623966666906	3.1789586037499973	2 Ca6Fe(CoO4)3 + 3 Li -> Ca2Fe2O5 + 3 LiCoO2 + 10 CaO + 3 CoO	2 Ca6Fe(CoO4)3 -> Ca2Fe2O5 + 2 Ca2Co3O8 + 3 CaO + 3 Ca	-0.40889221146740073	-0.3900544997159736	-0.14351783239817095
Ca6GaN5	0.2688226727083016	0.80778254125001	2 Ca6GaN5 + 4 Li -> Ca5(GaN2)2 + Ca3N2 + 4 LiCaN	Ca6GaN5 -> Ca3GaN3 + CaN2 + 2 Ca	-0.5954446530357131	-0.8914451412499991	-0.9510396780158845
Ca6MnN5	0.09623524833330777	0.8174813945833306	Ca6MnN5 + Li -> LiCaN + Ca2N + Ca3MnN3	Ca6MnN5 -> Ca2MnN3 + CaN2 + 3 Ca	-0.5596177574999985	-0.8637961630555533	-0.8921614115786198
Ca6Te3N2	0.0	0.9564394312499973	Li -> Li	Ca6Te3N2 -> CaN2 + 3 CaTe + 2 Ca	-0.4261590774999999	-0.684046790399992	-0.7908865084762531
Ca7(H6Cl)2	0.0	0.9885030950000034	Li -> Li	0.5 Ca7(H6Cl)2 -> CaHCl + 2.5 H2 + 2.5 Ca	-0.26475397766140785	-0.48045913762489145	-0.9016933033015719
Ca7NbSi2N9	0.005401829744882569	1.2677310462499904	3 Ca7NbSi2N9 + 41.8 Li -> Li4Ca3(SiN3)2 + 9 Ca2N + 0.8 Li21Si5 + 3 Li7NbN4	3 Ca7NbSi2N9 -> CaN6 + 3 Ca2NbN3 + 6 CaSiN2 + 8 Ca	-0.390431754214279	-0.6873756969720581	-0.8475233147838486
Ca7NbSi4O17F	1.7363992589584	3.64178927208338	2 Li + 0.5 CaNb2O4 + 1.5 CaNb2O6 -> Ca2Nb2O7 + 2 LiNbO2	2 Ca7NbSi4O17F -> Ca4Si2O7F2 + 6 CaSiO3 + CaNb2O6 + 1.5 O2 + 3 Ca	-0.10176897111168959	-0.2726445702567002	-0.04879228595314533
Ca7SiN6	0.1973367058333242	0.7992062693749873	Ca7SiN6 + Li -> LiCaN + Ca4SiN4 + Ca2N	Ca7SiN6 -> Ca4SiN4 + CaN2 + 2 Ca	-0.5741113712304116	-0.8682086055555598	-0.9704315876827407
Ca9B2(CCl2)4	0.12825455166666222	0.23540501374999842	0.5 Ca9B2(CCl2)4 + Li -> LiBC + 1.667 CaCl2 + 0.3333 Ca3C3Cl2 + 1.833 Ca	0.3 Ca9B2(CCl2)4 -> CaCl2 + 0.3 Ca(BC)2 + 0.2 Ca3C3Cl2 + 0.8 Ca	-0.48180336807692115	-0.7039672018682923	-1.011343794112555
Ca9Cr(PO4)7	1.9180325685417632	4.138322200000041	3.667 Ca9Cr(PO4)7 + 8 Li -> CrP + 11 Ca3(PO4)2 + 1.333 Cr2O3 + 2.667 Li3PO4	12 Ca9Cr(PO4)7 -> CaCr2P2O9 + 41 Ca2P2O7 + 10 CaCrO4 + 15 Ca	-0.8308892427797652	-0.1673553760294193	-0.6974166562923836
Ca9In(PO4)7	2.3850040996211916	4.075173403749957	0.2222 Ca9In(PO4)7 + 1.222 Li + LiInP2O7 -> Ca2P2O7 + 0.4074 In3(PO4)2 + 0.7407 Li3PO4	0.3333 Ca9In(PO4)7 -> Ca2P2O7 + 0.3333 InPO4 + 0.5 O2 + Ca	-0.027451198302007818	-0.1670493646544724	-0.016666466686443115
CaAgAsO4	3.422083800952417	3.5942714899999695	3 CaAgAsO4 + 3 Li -> Ca3(AsO4)2 + Li3AsO4 + 3 Ag	2 CaAgAsO4 -> Ca(AsO3)2 + 2 AgO + Ca	-0.3249603812339692	-0.1968031295159398	-0.0749514631825372
CaAl2(SiO4)2	1.2891685241665918	3.8851481787499793	4 CaAl2(SiO4)2 + 4 Li -> LiAl5O8 + 4 CaSiO3 + 3 LiAlSiO4 + Si	CaAl2(SiO4)2 -> Al2SiO5 + SiO2 + 0.5 O2 + Ca	-0.018766485652772502	-0.2447253209051743	-0.022699810203496096
CaAl2B2O7	1.2919819509895802	3.73267918821432	1.833 CaAl2B2O7 + 2.667 Li -> CaAlBO4 + 0.1667 B6O + 0.8333 Ca(BO2)2 + 2.667 LiAlO2	2.5 CaAl2B2O7 -> Al5BO9 + 0.6667 Ca2B6O11 + 0.5833 O2 + 1.167 Ca	-0.026816945133915304	-0.25784863217261034	-0.020640281891522783
CaAl4O7	0.7525251335256204	3.664578195000004	6 CaAl4O7 + 13 Li -> Ca6Al7O16 + 13 LiAlO2 + 4 Al	0.5 CaAl4O7 -> Al2O3 + 0.25 O2 + 0.5 Ca	-0.053499267009039286	-0.31604688706249773	-0.03626588111566509
CaAl6H12(SO7)4	2.949310687999981	3.417648435555559	1.667 CaAl6H12(SO7)4 + 6.25 Li -> AlH11SO10 + 9 AlHO2 + 0.25 LiS4 + 3 Li2SO4 + 1.667 CaSO4	1.667 CaAl6H12(SO7)4 -> AlH11SO10 + 9 AlHO2 + 1.667 CaSO4 + 6 O2 + 4 S	-0.12280743009738693	-0.16315520475608913	-0.050471041494250635
CaAlBO4	1.178941276583346	3.6648794824999547	10 CaAlBO4 + 10 Li -> Ca2B2O5 + 2.5 Ca3(BO3)2 + 10 LiAlO2 + 0.5 CaB6	2 CaAlBO4 -> CaAl2B2O7 + 0.5 O2 + Ca	-0.0556942004861094	-0.2872410371568579	-0.03160051347116388
CaAlF5	1.40482550666665	6.243132082500018	1.333 CaAlF5 + Li -> LiCaAlF6 + 0.3333 CaF2 + 0.3333 Al	CaAlF5 -> F2 + AlF3 + Ca	-0.01361968686991677	-0.0539810704545447	-0.06330704844276536
CaAlH5	0.7121311391666605	1.1175144662500063	0.3333 CaAlH5 + Li -> LiH + 0.3333 CaH2 + 0.3333 Al	CaAlH5 -> H2 + AlH3 + Ca	-0.21430138336145976	-0.46160273051764844	-1.0422930706932765
CaAs2F12	5.077161737083294	6.388109737499986	2.5 CaAs2F12 + 2 Li -> CaAs3F15 + 2 LiAsF6 + 1.5 CaF2	0.5 CaAs2F12 -> AsF5 + 0.5 F2 + 0.5 Ca	-0.3074186912288135	-0.052397806851822715	-0.23973678278571686
CaAs2H6F18	4.2868117177083285	7.0731229312500465	CaAs2H6F18 + 4 Li -> CaH2F4 + 4 LiHF2 + 2 AsF3	0.5 CaAs2H6F18 -> AsF5 + 0.5 F2 + 3 HF + 0.5 Ca	-0.24860926393300353	-6.9739437011693025e-15	-0.23098092185650598
CaAs2HF13	4.584881246458348	6.694384256249997	2 CaAs2HF13 + 1.6 Li -> CaH2F4 + 0.8 CaAs3F15 + 1.6 LiAsF6 + 0.2 CaF2	6 CaAs2HF13 -> CaAs2H6F18 + 10 AsF5 + 5 F2 + 5 Ca	-0.2777937332714857	-0.02389210037037115	-0.224007562620804
CaAs3F15	4.171168168333278	4.844479746249945	0.75 CaAs3F15 + Li -> LiAsF6 + 0.75 CaF2 + 1.25 AsF3	0.3333 CaAs3F15 -> AsF5 + 0.3333 Ca	-0.27046814822010834	-0.0211073512903166	-0.25265172507231126
CaB2F8	2.1512656769444236	6.776614023750002	0.6667 CaB2F8 + Li -> LiBF4 + 0.6667 CaF2 + 0.3333 B	0.5 CaB2F8 -> BF3 + 0.5 F2 + 0.5 Ca	-0.027503818083316922	0.0	-0.15375893689286335
CaB3H3O7	3.843621793333444	3.7869389492857235	Li + 4 O2 -> LiO8	3.333 CaB3H3O7 -> CaB8H4O15 + 2 B(HO)3 + 1.167 O2 + 2.333 Ca	-0.026835923615721846	-0.19193048177499872	-0.014474745718429993
CaB3HO6	1.8823894666666907	3.7833741650000268	5 CaB3HO6 + 3 Li -> Li3B5(HO5)2 + 5 Ca(BO2)2 + 1.5 H2	8 CaB3HO6 -> CaB8H4O15 + 2 Ca2B8H2O15 + 1.5 O2 + 3 Ca	-0.020105347734160617	-0.20339086891666414	-0.017239472049174864
CaB4O7	1.5952202334374945	3.9646835593748575	43.33 CaB4O7 + 16 Li -> B6O + 21.67 Ca2B6O11 + 5.333 Li3B7O12	1.5 CaB4O7 -> Ca(B3O5)2 + 0.25 O2 + 0.5 Ca	-0.008677162123700732	-0.20322727472222502	-0.025306403413454692
CaB8H4O15	1.9538740797618739	4.393790930000057	3.333 CaB8H4O15 + 4.667 Li -> Li3B5(HO5)2 + 1.667 LiB5H2O9 + 1.667 Ca2B8H2O15 + 2.333 H2	0.25 CaB8H4O15 -> BHO2 + 0.5 B2O3 + 0.125 O2 + 0.25 Ca	-0.0076072464754819435	-0.18025223771590104	-0.02834816845663113
CaBe2(PO4)2	1.850973222888876	4.357138733214302	3 CaBe2(PO4)2 + 7.5 Li -> Ca3(PO4)2 + 2.5 Li3PO4 + 6 BeO + 1.5 P	4 CaBe2(PO4)2 -> Ca4P6O19 + Be(PO3)2 + 3.5 O2 + 7 Be	-1.7177734220949695e-15	-0.14541330006410513	-0.045692866411428223
CaBi6(PO5)4	2.4375403116389114	4.049554574999981	3 CaBi6(PO5)4 + 30 Li -> Ca3(PO4)2 + 10 Li3PO4 + 4 Bi2O3 + 10 Bi	0.5 CaBi6(PO5)4 -> BiO2 + 2 BiPO4 + 0.5 Ca	-0.18584998931121444	-0.18567628322785001	-0.06155982342332855
CaBiClO2	1.6675709166666517	3.5439509234615367	3 CaBiClO2 + 6 Li -> Li3BiO3 + 3 LiCl + 3 CaO + 2 Bi	15 CaBiClO2 -> Bi4O7 + 2 Ca(ClO3)2 + 11 BiClO + 13 Ca	-0.2585674506250011	-0.30241463416666603	-0.06323502247364265
CaBiIO2	1.611819276666654	2.9022080207812406	3 CaBiIO2 + 6 Li -> Li3BiO3 + 3 LiI + 3 CaO + 2 Bi	1.444 CaBiIO2 -> BiIO + 0.1111 Ca5(IO6)2 + 0.1111 Bi4I2O5 + 0.8889 Ca	-0.25677407569445254	-0.33964330692307465	-0.20549603623486834
CaBr2	0.06818660833333556	3.775616102499996	CaBr2 + 2 Li -> Ca + 2 LiBr	0.5 CaBr2 -> Br + 0.5 Ca	0.0	-0.13218130818181728	-0.02622215417205498
CaC2(NO)2	1.8991513770833048	1.969657107500037	1.5 CaC2(NO)2 + 2 Li -> Li2CO3 + 1.5 CaCN2 + 0.5 C	1.5 CaC2(NO)2 -> CaCO3 + 1.5 N2 + 2 C + 0.5 Ca	-0.06592504708729852	-0.22921955833332763	-0.4177876404592782
CaCN2	0.11413527666665568	2.0210575850000008	2 CaCN2 + 3 Li -> Ca2N + 1.5 Li2CN2 + 0.5 C	CaCN2 -> N2 + C + Ca	-0.03395798930803462	-0.4154736375480943	-0.5680061688742848
CaCO3	1.622935913333336	4.0792761175000045	1.5 CaCO3 + 2 Li -> Li2CO3 + 1.5 CaO + 0.5 C	CaCO3 -> CO2 + 0.5 O2 + Ca	-0.14732293473214142	-0.18875973272727586	-9.711880175844457e-15
CaCd(CO3)2	2.3358777933333537	4.080683990000011	CaCd(CO3)2 + 2 Li -> CaCO3 + Li2CO3 + Cd	CaCd(CO3)2 -> CO2 + CdCO3 + 0.5 O2 + Ca	-0.21963176473214352	-0.16299795307692433	-0.01918470329546107
CaCdP2O7	2.4280773352082914	4.358679771874954	2 CaCdP2O7 + 4 Li -> Li4P2O7 + Ca2P2O7 + 2 Cd	CaCdP2O7 -> Cd(PO3)2 + 0.5 O2 + Ca	-0.09701350081634619	-0.13934066811402324	-0.0572204936200702
CaCeV2O8	2.742802151666668	4.283058860000019	1.667 CaCeV2O8 + 2 Li -> CaV2O5 + 0.6667 Li3VO4 + 1.667 CeO2 + 0.3333 Ca2V2O7	CaCeV2O8 -> V2O5 + CeO2 + 0.5 O2 + Ca	-0.28215593718749954	-0.1871624531944467	-0.034052059265869516
CaCl2	0.0686016533333369	4.032246914999996	CaCl2 + 2 Li -> Ca + 2 LiCl	CaCl2 -> Cl2 + Ca	0.0	-0.12979124454545343	-0.053081431009597474
CaCo(GeO3)2	2.4748808731250507	3.413758370166647	4 CaCo(GeO3)2 + 4 Li -> Li2CoGeO4 + 4 CaGeO3 + Li2CoGe3O8 + 2 Co	3.75 CaCo(GeO3)2 -> Ca2Ge7O16 + 0.5 CaGeO3 + 1.25 Co3O4 + 1.25 Ca	-0.2731093711552819	-0.20055014136366633	-0.07756341078126994
CaCo(PO3)4	2.8283736750185007	4.515462238749961	0.4348 CaCo(PO3)4 + 1.174 Li -> LiPO3 + 0.1304 Co2P + 0.1739 LiCoPO4 + 0.2174 Ca2P2O7	CaCo(PO3)4 -> CaP4O11 + 0.5 O2 + Co	-0.09161443986895623	-0.1327038302127641	-0.13582632531061112
CaCo2Te3(ClO4)2	2.601768597616686	3.5859067206250073	0.875 CaCo2Te3(ClO4)2 + 3.75 Li -> Li2TeO3 + 0.875 CaTeO3 + 0.375 CoTe2 + 1.75 LiCl + 1.375 CoO	5 CaCo2Te3(ClO4)2 -> Co5Te4Cl4O11 + 5 CoTeO4 + 1.5 TeCl4 + 4.5 TeO2 + 5 Ca	-0.34959656547582885	-0.19741284592773223	-0.17281720925335398
CaCoF6	5.823458353333326	6.343708030000016	CaCoF6 + Li -> LiCaCoF6	CaCoF6 -> CoF3 + 1.5 F2 + Ca	-0.5218879257291662	0.0	-0.26543269412500337
CaCoGeO4	2.4074557033333277	3.314326845833287	2 CaCoGeO4 + 2 Li -> Li2CoGeO4 + Ca2GeO4 + Co	2 CaCoGeO4 -> CaGeO3 + 0.5 CaCo(GeO3)2 + 0.5 Co3O4 + 0.5 Ca	-0.285682972833325	-0.24342665499999416	-0.07865450404762075
CaCr2O4	1.4380564766666661	3.1749108133334216	0.6667 CaCr2O4 + Li -> LiCrO2 + 0.6667 CaO + 0.3333 Cr	2.5 CaCr2O4 -> CaCrO4 + 2 Cr2O3 + 1.5 Ca	-1.561381609722221	-0.28405797361109775	-2.3469385111428496
CaCr2P2O9	2.3341497268055775	4.248710839999941	5 CaCr2P2O9 + 6 Li -> Li2CrP2O7 + 2 Cr2O3 + 1.333 Li3PO4 + 1.667 Ca3Cr3(PO4)4	7 CaCr2P2O9 -> Ca2P2O7 + 12 CrPO4 + 2 CaCrO4 + 3 Ca	-2.4320586628733754	-0.1546515710156271	-2.3581973732803867
CaCrF4	2.058005073333331	2.6991906100000023	0.5 CaCrF4 + Li -> LiF + 0.5 CaF2 + 0.5 Cr	1.5 CaCrF4 -> CaCrF5 + 0.5 CaF2 + 0.5 Cr	-0.0865445734738306	-0.061745068999993435	-2.0919364897499806
CaCrF5	2.879476793333336	4.995433663333338	2 CaCrF5 + Li -> LiCaCrF6 + CaCrF4	1.333 CaCrF5 -> CaCrF6 + 0.3333 CaF2 + 0.3333 Cr	-0.09093507802629963	-0.05278170136363425	-2.0129553710714103
CaCrF6	5.208783383333346	6.103602780000015	CaCrF6 + Li -> LiCaCrF6	2 CaCrF6 -> CaCr2F12 + Ca	-0.23293902881410222	-0.007015722916663414	-2.0408469250000136
CaCrO4	2.77891518208333	4.099688848500016	2 CaCrO4 + 4 Li -> Li3CrO4 + LiCrO2 + 2 CaO	5 CaCrO4 -> Cr5O12 + 4 O2 + 5 Ca	-1.8405783804336706	-0.19163037122023585	-2.1870940571875663
CaCrP2O7	2.3977943936905888	2.725027916874923	4.333 CaCrP2O7 + 3.111 Li -> Ca2P2O7 + 0.4444 CrP + 1.556 Li2CrP2O7 + 0.7778 Ca3Cr3(PO4)4	4 CaCrP2O7 -> Cr(PO3)3 + Ca2P2O7 + 3 CrPO4 + 2 Ca	-2.371497985767811	-0.14342317640084712	-1.9588395014122435
CaCu2F8	5.635727283333361	7.129257024999959	CaCu2F8 + 0.5 Li -> CaCuF5 + 0.5 LiCu2F6	0.5 CaCu2F8 -> CuF2 + F2 + 0.5 Ca	-0.5548972226593176	0.0	-0.280300815855266
CaCuF4	3.5426967108333236	5.038693912499995	0.5 CaCuF4 + Li -> LiF + 0.5 CaF2 + 0.5 Cu	1.5 CaCuF4 -> CaCuF5 + 0.5 CaF2 + 0.5 Cu	-0.27301386861979493	-0.057324050999999265	-0.15720154875000647
CaCuP2O7	3.4275574020834125	4.421709961249991	2 CaCuP2O7 + 2 Li -> Li2CuP2O7 + Ca2P2O7 + Cu	4 CaCuP2O7 -> Ca4P6O19 + Cu2PO5 + CuPO4 + Cu	-0.16373827787793793	-0.13406194973704477	-0.09946789312890036
CaF2	0.006443482083335894	6.195421642499993	CaF2 + 4 Li -> Li2Ca + 2 LiF	CaF2 -> F2 + Ca	0.0	-0.09895863428571383	0.0
CaFe(GeO3)2	2.1643415403332966	2.685219233249913	CaFe(GeO3)2 + 1.667 Li -> CaGeO3 + 0.1667 Fe3Ge + 0.3333 Li2GeO3 + 0.5 Li2FeGeO4	1.625 CaFe(GeO3)2 -> FeGeO3 + 0.3125 Ca3Fe2(GeO4)3 + 0.1875 Ca2Ge7O16 + 0.3125 Ca	-0.24132613424242377	-0.16136140239583652	-0.14933475544646502
CaFe(PO3)4	2.6511434143333545	3.7541574960417523	0.5 CaFe(PO3)4 + Li -> LiPO3 + 0.07143 Ca2P2O7 + 0.1429 FeP + 0.3571 CaFeP2O7	2 CaFe(PO3)4 -> Ca(PO3)2 + 2 Fe(PO3)3 + Ca	-0.07463541882787439	-0.137201038668874	-0.24683836193325792
CaFe3(P2O7)2	2.5891701097619144	3.3616015487499284	0.5714 CaFe3(P2O7)2 + Li -> LiFePO4 + 0.1429 FeP + 0.5714 CaFeP2O7	CaFe3(P2O7)2 -> Fe3(P2O7)2 + Ca	-0.08490991959929772	-0.12414300497325748	-0.27658642172123127
CaFeBP2(HO5)2	3.410115273333332	4.167696037499973	Li + 3 FePO4 + FePH2O5 -> Fe3P2(HO5)2 + LiFeP2O7	CaFeBP2(HO5)2 -> FePH2O5 + BPO4 + 0.5 O2 + Ca	-0.09373621488144757	-0.12342878833603566	-0.08885717411263627
CaFeClO2	2.189123558333325	3.3723794558333107	4 CaFeClO2 + Li -> LiFeO2 + Ca2Fe2O5 + 2 CaCl2 + FeO	12 CaFeClO2 -> Ca(ClO3)2 + 6 Fe2O3 + 5 CaCl2 + 6 Ca	-0.28522701638889325	-0.07931687166666102	-0.07211196534542275
CaFeF5	3.688579998333328	6.336697115833335	2 CaFeF5 + Li -> LiCaFeF6 + CaF2 + FeF2	1.5 CaFeF5 -> FeF6 + 0.5 FeF3 + 1.5 Ca	-0.1630280450624988	-0.05126743939393874	-2.007833485909108
CaFeP2O7	2.5420201983332738	3.4028577212500335	1.143 CaFeP2O7 + Li -> LiFePO4 + 0.5714 Ca2P2O7 + 0.1429 FeP	3 CaFeP2O7 -> Fe3(P2O7)2 + Ca2P2O7 + Ca	-0.06318631244436723	-0.12632263450330794	-0.23915324303621865
CaFeSn(PO4)3	3.200456014333363	4.239535214999954	5 CaFeSn(PO4)3 + 5 Li -> CaSn4(PO4)6 + 2 Ca2P2O7 + 5 LiFePO4 + SnO2	CaFeSn(PO4)3 -> SnP2O7 + FePO4 + 0.5 O2 + Ca	-0.14182396917811602	-0.12469597695151302	-0.09941215689927052
CaGa4O7	1.782556900555604	3.7051636825	3 CaGa4O7 + 6 Li -> Ca3Ga4O9 + 6 LiGaO2 + 2 Ga	0.5 CaGa4O7 -> Ga2O3 + 0.25 O2 + 0.5 Ca	-0.25407583414797097	-0.22657688513888896	-0.025964436922082612
CaGaBO4	1.8180014350000262	3.7494567684374904	2 CaGaBO4 + 1.5 Li -> Ca2B2O5 + 1.5 LiGaO2 + 0.5 Ga	6 CaGaBO4 -> Ca2B6O11 + 3 Ga2O3 + 2 O2 + 4 Ca	-0.1684613741450498	-0.23277648817934615	-0.023918354128249053
CaGaBiB2O7	2.3537351391666643	3.78746905125002	5 CaGaBiB2O7 + 3 Li -> Bi4B2O9 + 3 Ca(BO2)2 + 2 CaGaBO4 + 3 LiGaO2 + Bi	3 CaGaBiB2O7 -> Ca2B6O11 + 0.5 Bi4O7 + BiO2 + 1.5 Ga2O3 + Ca	-0.20253240799580396	-0.23089259415624808	-0.030919088409040896
CaGaH5	1.111720154166692	0.7328102112500102	1.333 CaGaH5 + Li -> LiGaH4 + 1.333 CaH2 + 0.3333 Ga	0.4 CaGaH5 -> H2 + 0.4 Ga + 0.4 Ca	-0.22223182028854382	-0.3280173817872747	-0.9193606878991611
CaGd2(GeO3)4	2.0452819695833737	3.937953722499996	CaGd2(GeO3)4 + 1.333 Li -> CaGeO3 + Gd2Ge2O7 + 0.6667 Li2GeO3 + 0.3333 Ge	CaGd2(GeO3)4 -> Gd2Ge2O7 + 0.5 O2 + 2 GeO2 + Ca	-0.22883592185042634	-0.18161124851648514	-0.04683450029386638
CaGd2Zr(GaO3)4	1.6219234420000823	3.5521311555000668	1.5 CaGd2Zr(GaO3)4 + 3.75 Li -> Gd3GaO6 + 3.75 LiGaO2 + 1.5 CaZrO3 + 1.25 Ga	1.5 CaGd2Zr(GaO3)4 -> Gd3Ga5O12 + 0.25 CaGa4O7 + 1.5 ZrO2 + 0.625 O2 + 1.25 Ca	-0.2217550881896484	-0.24037650382353304	-0.04836403191199157
CaGeN2	0.5778963560833177	1.4728996475000034	2 CaGeN2 + 3.333 Li -> Ca2GeN2 + 0.6667 Li5GeN3 + 0.3333 Ge	9 CaGeN2 -> CaN6 + 3 Ge3N4 + 8 Ca	-0.2818084753125012	-0.5624307867857108	-0.7330969272789991
CaGeO3	2.040190443333338	3.710715043166666	2 CaGeO3 + 1.333 Li -> Ca2GeO4 + 0.6667 Li2GeO3 + 0.3333 Ge	7 CaGeO3 -> Ca2Ge7O16 + 2.5 O2 + 5 Ca	-0.2292331488826589	-0.24774636824074703	-0.034568670705276805
CaH2	-0.0	0.9810199899999978	Li -> Li	CaH2 -> H2 + Ca	-0.27976235999708265	-0.5192070432885683	-0.9598324369897966
CaH2F4	2.692099398333334	6.540392512500003	CaH2F4 + Li -> LiHF2 + CaF2 + 0.5 H2	CaH2F4 -> F2 + 2 HF + Ca	-0.08243049520270107	0.0	-0.12560359185606051
CaH3NO5	2.7493920808333643	3.6482274712499962	CaH3NO5 + 1.667 Li -> Ca(HO)2 + LiHO + 0.6667 LiNO3 + 0.1667 N2	2 CaH3NO5 -> Ca(NO3)2 + 3 H2O + 0.5 O2 + Ca	-0.39826786542590664	-0.15511892727270693	-0.029124138341579453
CaH4NClO5	3.1337649163333383	4.1459594404687525	1.2 CaH4NClO5 + Li -> LiNO3 + 1.2 CaHClO + 1.8 H2O + 0.1 N2	7 CaH4NClO5 -> H7ClO7 + 7 H3NO4 + 3 CaCl2 + 4 Ca	-0.3648104891517896	-0.11713572558594221	-0.05277005728260864
CaHBr	2.6645352591003757e-15	1.08559076	Li -> Li	2 CaHBr -> CaBr2 + H2 + Ca	-0.2028667358749976	-0.3425247315519999	-0.659210513142853
CaHCl	0.020541983333312697	1.0365627650000007	12 CaHCl + 10 Li -> Ca7(H6Cl)2 + 10 LiCl + 5 Ca	2 CaHCl -> CaCl2 + H2 + Ca	-0.20415784677515436	-0.35230820155200027	-0.7004251212380872
CaHClO	1.0655611933333295	3.652497465312492	CaHClO + Li -> LiCl + CaO + 0.5 H2	16 CaHClO -> CaH8(ClO6)2 + 7 CaCl2 + 4 H2O + 8 Ca	-0.06725985812499946	-0.22448618250000107	-0.04501814421250483
CaHI	2.4424906541753444e-15	1.0306511850000022	Li -> Li	2 CaHI -> CaI2 + H2 + Ca	-0.211511423875002	-0.35345660655199884	-0.6676924869285701
CaHN	0.4467168873958247	0.953535100000011	17 CaHN + 16 Li -> Li15H9N8 + LiCaN + 8 Ca2HN	4 CaHN -> CaN2 + Ca(H2N)2 + 2 Ca	-0.4326007030882266	-0.7168389628571421	-0.7290983090619059
CaHfO3	0.13420239583333693	3.536128596249937	1.5 CaHfO3 + 2 Li -> Li2HfO3 + 1.5 CaO + 0.5 Hf	2 CaHfO3 -> O2 + 2 HfO2 + 2 Ca	-0.12641499205356688	-0.31943616068627456	-0.06420409508451952
CaHgO2	2.2094489508333153	3.564410213749952	CaHgO2 + 2 Li -> Li2O + CaO + Hg	2 CaHgO2 -> O2 + 2 HgO + 2 Ca	-0.4300659492187502	-0.33358925375000004	-0.09342149605677408
CaHo(MoO3)2	1.9078081000000005	2.1891219856249675	2.667 CaHo(MoO3)2 + 2 Li -> Li2MoO4 + 2.667 CaMoO3 + 1.333 Ho2O3 + 1.667 Mo	2 CaHo(MoO3)2 -> CaMoO3 + Ho2O3 + 3 MoO2 + Ca	-0.3695758298743348	-0.31600748298076375	-0.3015320975683782
CaHo2(GeO3)4	2.194001641458388	3.719654492916578	CaHo2(GeO3)4 + 1.333 Li -> CaGeO3 + Ho2Ge2O7 + 0.6667 Li2GeO3 + 0.3333 Ge	3.5 CaHo2(GeO3)4 -> Ca2Ge7O16 + 3.5 Ho2Ge2O7 + 0.75 O2 + 1.5 Ca	-0.2118730488803453	-0.22318440255815153	-0.03579081224172409
CaHoV2O6	1.985040294136887	2.2125119671427957	1.6 CaHoV2O6 + 0.8 Li -> CaV2O4 + 0.2 Ca3V2O8 + 0.8 LiVO2 + 0.8 Ho2O3	4 CaHoV2O6 -> Ca2V3O8 + 4 HoVO3 + 0.5 Ca3V2O8 + 0.5 Ca	-0.25647870765626823	-0.3092103085576783	-0.23520714800420084
CaI2	0.01022562458333498	3.013616889999996	CaI2 + 4 Li -> Li2Ca + 2 LiI	0.5 CaI2 -> I + 0.5 Ca	0.0	-0.14709029840909071	-0.26056340753472307
CaIn2O4	1.4852036083333315	3.402628109999985	0.6667 CaIn2O4 + Li -> LiInO2 + 0.6667 CaO + 0.3333 In	CaIn2O4 -> In2O3 + 0.5 O2 + Ca	-0.33095468981482057	-0.2971234143478241	-0.07540603682151348
CaInBr3	1.748416223333344	2.2343078249999992	CaInBr3 + Li -> LiBr + CaBr2 + In	CaInBr3 -> InBr2 + 0.5 CaBr2 + 0.5 Ca	-0.07119908236312078	-0.16397381251999832	-0.3135139481034479
CaLa2B10O19	1.328893989947872	4.128358569999943	CaLa2B10O19 + 2.215 Li -> Ca(BO2)2 + 0.1385 B6O + 2 LaBO3 + 0.7385 Li3B7O12	0.5 CaLa2B10O19 -> LaB5O9 + 0.25 O2 + 0.5 Ca	-0.021929688301130845	-0.2082037561314003	-0.020009374497410803
CaLa4Si3O13	0.6224126189242618	3.81657506500005	2 CaLa4Si3O13 + 11.58 Li -> Ca2SiO4 + 1.053 LaSi2 + 2.895 Li4SiO4 + 3.474 La2O3	CaLa4Si3O13 -> La2Si2O7 + La2SiO5 + 0.5 O2 + Ca	-0.08033634494642428	-0.31095276039115705	-0.08446021683095228
CaLaAl3O7	0.6717450927876918	3.5140980699999615	6 CaLaAl3O7 + 6.793 Li -> Ca6Al7O16 + 0.4828 LaAl3 + 1.379 La4Al2O9 + 6.793 LiAlO2	2 CaLaAl3O7 -> CaAl4O7 + 2 LaAlO3 + 0.5 O2 + Ca	-0.10659791370679805	-0.34520038897916505	-0.08365465142255868
CaLaGaO4	1.1546965791666675	3.4606925885714213	1.333 CaLaGaO4 + Li -> LiGaO2 + 1.333 CaO + 0.6667 La2O3 + 0.3333 Ga	8 CaLaGaO4 -> CaGa4O7 + 2 La4Ga2O9 + 3.5 O2 + 7 Ca	-0.24677842966288965	-0.3786513049509792	-0.1238584707158501
CaLaMgTaO6	0.7139663508332741	3.5132169512499636	6 CaLaMgTaO6 + 3.75 Li -> La3TaO7 + 6 MgO + 3 Ca2LaTaO6 + 1.25 Li3TaO4 + 0.75 Ta	CaLaMgTaO6 -> MgO + LaTaO4 + 0.5 O2 + Ca	-0.10832160441326533	-0.34115289585065023	-0.08796616650533462
CaLaMnNbO6	1.3643707984302482	1.6857048759524353	4 CaLaMnNbO6 + 2.667 Li -> Ca4Nb2O9 + 2.667 MnO + 1.333 La3NbO7 + 0.3333 Li8Nb2O9 + 1.333 Mn	5.4 CaLaMnNbO6 -> Ca4Nb2O9 + 0.4 La5Mn5O16 + 3.4 LaNbO4 + 3.4 MnO + 1.4 Ca	-0.1952722882288418	-0.3330146449392277	-0.12314189696734523
CaLaTaFeO6	1.8461964138333196	2.387897491249893	4 CaLaTaFeO6 + 5 Li -> LaFeO3 + 2 Ca2LaTaO6 + 0.3333 La3TaO7 + 1.667 Li3TaO4 + 3 Fe	2.667 CaLaTaFeO6 -> Fe2O3 + 0.6667 LaFeO3 + 2 LaTaO4 + 0.3333 Ca4Ta2O9 + 1.333 Ca	-0.1579588869422981	-0.27383901996539883	-0.19178089083333383
CaMg(CO3)2	2.1120325208333326	4.0085627125000025	CaMg(CO3)2 + 1.333 Li -> CaCO3 + 0.6667 Li2CO3 + MgO + 0.3333 C	CaMg(CO3)2 -> CaCO3 + CO2 + 0.5 O2 + Mg	-0.13424663018668692	-0.1874522818181874	-0.016032275568190535
CaMg(SiO3)2	1.2325777091666277	3.735066740833339	2 CaMg(SiO3)2 + 2 Li -> Li2MgSiO4 + 2 CaSiO3 + 0.5 Mg2SiO4 + 0.5 Si	CaMg(SiO3)2 -> CaSiO3 + SiO2 + 0.5 O2 + Mg	-0.03927244348212611	-0.2470145613888759	-0.032132490128363056
CaMg2(SO4)3	2.597114655333364	3.52651924427084	1.667 CaMg2(SO4)3 + 2.083 Li -> Li2Mg2(SO4)3 + 1.667 CaSO4 + 0.08333 LiS4 + 1.333 MgO	CaMg2(SO4)3 -> CaSO4 + 2 MgO + 3 O2 + 2 S	-0.1560063650423702	-0.11339840206248342	-0.04130814544117456
CaMg2N2	0.0385122058333347	0.9081625631249979	0.6667 CaMg2N2 + 1.333 Li -> LiMgN + 0.3333 LiMg + 0.3333 Ca2N	3 CaMg2N2 -> CaN2 + 2 Mg3N2 + 2 Ca	-0.496916324919356	-0.8231904141176443	-0.9557683895007365
CaMg3SiN4	0.07862140258332762	1.1446685119531186	2 CaMg3SiN4 + 5 Li -> Li4Ca2Mg(SiN3)2 + LiMg2 + Mg3N2	9 CaMg3SiN4 -> CaN6 + 9 MgSiN2 + 6 Mg3N2 + 8 Ca	-0.3381274095588269	-0.6843067991717	-0.8802344024907995
CaMgAsO4F	2.235727950555552	3.8989170974999436	2.4 CaMgAsO4F + 3 Li -> Li3AsO4 + 2.4 MgO + 0.2667 Ca5As3O12F + 1.067 CaF2 + 0.6 As	2 CaMgAsO4F -> Ca(AsO3)2 + CaF2 + O2 + 2 Mg	-0.18927792858714776	-0.18453647977257925	-0.018828209013883157
CaMgGeO4	1.7678549683334073	3.663515264999997	3 CaMgGeO4 + 2 Li -> Li2MgGeO4 + 1.5 Ca2GeO4 + 2 MgO + 0.5 Ge	CaMgGeO4 -> MgGeO3 + 0.5 O2 + Ca	-0.1837278766666457	-0.2962650116666645	-0.04422743633288073
CaMgSiO4	0.8472327264583923	3.673948700833356	3 CaMgSiO4 + 2 Li -> Li2MgSiO4 + 1.5 Ca2SiO4 + 2 MgO + 0.5 Si	2 CaMgSiO4 -> CaSiO3 + Mg2SiO4 + 0.5 O2 + Ca	-0.061159795208366674	-0.3038590398333261	-0.041193905105880724
CaMn(GeO3)2	2.092733162083377	3.1833708190999856	CaMn(GeO3)2 + 1.333 Li -> CaMnGeO4 + 0.6667 Li2GeO3 + 0.3333 Ge	58 CaMn(GeO3)2 -> Ca3Mn2(GeO4)3 + 8 Mn7GeO12 + 15 Ca2Ge7O16 + 25 Ca	-0.22010923192605958	-0.21118645636362743	-0.1103818171296167
CaMn(PO3)4	2.5739587006779843	4.359523256041685	25 CaMn(PO3)4 + 44 Li -> Ca2P2O7 + 44 LiPO3 + 2 MnP4 + 23 CaMnP2O7	2 CaMn(PO3)4 -> Ca(PO3)2 + 2 Mn(PO3)3 + Ca	-0.05667216467209091	-0.13292666085105953	-0.14764857941277132
CaMn2Be3(SiO4)3	1.763958882076142	2.975121582638907	CaMn2Be3(SiO4)3 + 4 Li -> CaSiO3 + 2 Li2BeSiO4 + BeO + 2 Mn	3.5 CaMn2Be3(SiO4)3 -> Mn7SiO12 + 0.5 CaSiO3 + 5.25 Be2SiO4 + 3.75 SiO2 + 3 Ca	-0.06189069553077431	-0.2330452142901276	-0.11035039635133881
CaMn2O4	2.0746034508333224	2.976576788333312	CaMn2O4 + Li -> LiMnO2 + CaO + MnO	1.75 CaMn2O4 -> Mn2O3 + 0.5 Ca2Mn3O8 + 0.75 Ca	-0.2955449425386738	-0.27103288815215176	-0.11590098794644099
CaMn4(SiO3)5	1.6774529353053635	2.952257443333361	0.75 CaMn4(SiO3)5 + 4 Li -> Li2Si2O5 + Li2MnSiO4 + 0.75 CaSiO3 + 2 Mn	1.2 CaMn4(SiO3)5 -> Mn2SiO4 + 0.4 Mn7SiO12 + 4.6 SiO2 + 1.2 Ca	-0.07606967620578242	-0.2223243706874931	-0.14532500538167614
CaMn6SiO12	2.697206496666709	3.618270748124981	2 CaMn6SiO12 + 3.6 Li -> Li2MnSiO4 + 0.8 Li2MnO3 + Ca2SiO4 + 3.4 Mn3O4	2 CaMn6SiO12 -> Mn7SiO12 + 5 MnO2 + SiO2 + 2 Ca	-0.27500047070920264	-0.21018014966854315	-0.10856738754263873
CaMnF5	4.098968343333276	4.789366229310373	2 CaMnF5 + Li -> LiMnF4 + 2 CaF2 + MnF2	1.333 CaMnF5 -> CaMnF6 + 0.3333 CaF2 + 0.3333 Mn	-0.18928891371609957	-0.05037667651515143	-0.1447905813367929
CaMnF6	4.721845985	6.663876051250006	1.5 CaMnF6 + Li -> CaMnF5 + 0.5 Li2MnF6 + 0.5 CaF2	CaMnF6 -> MnF4 + F2 + Ca	-0.28923026919084993	0.0	-0.16954969976567824
CaMnGeO4	1.7556545370834062	2.883032388749981	3 CaMnGeO4 + 2 Li -> Li2MnGeO4 + 1.5 Ca2GeO4 + 2 MnO + 0.5 Ge	4 CaMnGeO4 -> Ca3Mn2(GeO4)3 + Mn2GeO4 + Ca	-0.2130934035193346	-0.2643120798332932	-0.13483604964290397
CaMnP2O7	2.3336488561903863	3.9879962370904916	2 CaMnP2O7 + 1.75 Li -> Ca2P2O7 + 0.25 MnP + 1.75 LiMnPO4	7 CaMnP2O7 -> CaMn(PO3)4 + 3 Ca2P2O7 + 4 MnPO4 + 2 Mn	-0.040216068024109486	-0.14253728574561086	-0.12407555222221678
CaMnSiO4	1.5462776218677798	2.876339600138859	2 CaMnSiO4 + 2 Li -> Li2MnSiO4 + Ca2SiO4 + Mn	5.5 CaMnSiO4 -> Mn2SiO4 + 4 CaSiO3 + 0.5 Mn7SiO12 + 1.5 Ca	-0.1095841449127386	-0.27561430199999215	-0.13465242607142258
CaMo2P2O9	2.4359009419096544	3.14273401249994	3 CaMo2P2O9 + 12 Li -> Ca3(PO4)2 + 4 Li3PO4 + 1.5 MoO2 + 4.5 Mo	CaMo2P2O9 -> MoP2O7 + MoO2 + Ca	-0.28462891604416996	-0.15977429770834028	-0.26467559366070503
CaMoN3	1.2704832340476226	1.5065342440164027	4 CaMoN3 + 7 Li -> LiMoN2 + Li6MoN4 + 2 Ca2MoN3	15 CaMoN3 -> Mo15N16 + 4.833 CaN6 + 10.17 Ca	-0.260105615778468	-0.48785855741793505	-0.5840857771726671
CaMoO3	1.5837726777083425	2.3177586512499926	1.5 CaMoO3 + 2 Li -> Li2MoO3 + 1.5 CaO + 0.5 Mo	2 CaMoO3 -> CaMoO4 + MoO2 + Ca	-0.4007634407386389	-0.3002833722222302	-0.25183038827585325
CaMoO4	2.0117401229166614	4.083237899375017	2 CaMoO4 + 2 Li -> Li2MoO4 + CaMoO3 + CaO	CaMoO4 -> MoO3 + 0.5 O2 + Ca	-0.37983940786458437	-0.1869846160416646	-1.446872773147588e-14
CaN6	0.849476275833343	0.9038658500000055	CaN6 + 1.333 Li -> CaN2 + 1.333 LiN3	0.3333 CaN6 -> N2 + 0.3333 Ca	-0.11307495825586056	-0.37119500248430803	-0.2541779154285516
CaNb2(P2O7)3	2.84382710308342	5.268486793999919	CaNb2(P2O7)3 + Li -> Ca(PO3)2 + Nb2(PO4)3 + LiPO3	2.5 CaNb2(P2O7)3 -> Nb5P7O30 + 4 P2O5 + 1.25 O2 + 2.5 Ca	-0.08578700379226678	-0.13201301123436715	-0.11634417657741647
CaNb2O4	1.041139901666678	2.0550569366666456	0.6667 CaNb2O4 + Li -> LiNbO2 + 0.6667 CaO + 0.3333 Nb	2 CaNb2O4 -> CaNb4O8 + Ca	-0.2403189565188617	-0.2157713690502181	-0.5060149357711001
CaNdAl3O7	0.7840351684138334	3.4424108949999606	6 CaNdAl3O7 + 4.429 Li -> Ca6Al7O16 + 0.2857 NdAl3 + 5.714 NdAlO3 + 4.429 LiAlO2	2 CaNdAl3O7 -> CaAl4O7 + 2 NdAlO3 + 0.5 O2 + Ca	-0.1059818386356719	-0.34576469385416475	-0.06921238578488476
CaNi(GeO3)2	2.6005321585832775	3.7238185034375104	4.8 CaNi(GeO3)2 + 2 Li -> Li2NiGe3O8 + 4.8 CaGeO3 + 0.2 Ni3Ge + 1.6 Ni2GeO4	4.667 CaNi(GeO3)2 -> Ca2Ge7O16 + 2.333 Ni2GeO4 + 1.333 O2 + 2.667 Ca	-0.2959555225757584	-0.1997573565909101	-0.02329618736110728
CaNi(PO3)4	2.8625466488787836	4.501258246249979	9 CaNi(PO3)4 + 22 Li -> CaNi3(P2O7)2 + 22 LiPO3 + 2 Ni3P + 4 Ca2P2O7	CaNi(PO3)4 -> CaP4O11 + 0.5 O2 + Ni	-0.11309247855921001	-0.13313221101064077	-0.11279706818801838
CaNi3(P2O7)2	2.7565997456250266	4.230100568749978	0.6667 CaNi3(P2O7)2 + 4 Li -> Li4P2O7 + 0.3333 Ca2P2O7 + 2 Ni	CaNi3(P2O7)2 -> CaNi(PO3)4 + O2 + 2 Ni	-0.19031931766467558	-0.13758787090909053	-0.07226478146057591
CaNiAsHO5	2.462812212083367	3.99841156774998	5 CaNiAsHO5 + 6 Li -> Ca5As3HO13 + 2 Li3AsO4 + 2 NiO + 3 Ni + 2 H2O	3 CaNiAsHO5 -> Ni3(AsO4)2 + 0.5 Ca(AsO3)2 + 1.25 O2 + 1.5 H2O + 2.5 Ca	-0.32506296544136815	-0.18506224769737978	-0.018424832545063996
CaNiF5	5.957473858333344	6.275118885000011	2 CaNiF5 + Li -> LiCaNiF6 + CaF2 + NiF2	3 CaNiF5 -> NiF3 + 2 CaNiF6 + Ca	-0.4819437060937508	-0.03413907249999992	-0.20206883200002146
CaNiF6	6.33188919583333	6.35862375375	Li + 0.5 F2 -> LiF	CaNiF6 -> NiF3 + 1.5 F2 + Ca	-0.660772132604166	0.0	-0.3458436175000079
CaO	4.440892098500626e-16	3.474202855000036	Li -> Li	2 CaO -> CaO2 + Ca	-0.3296907979687598	-0.5228757170833336	-0.1509531523225487
CaP2H2O7	2.3763025755769545	4.532323838333315	1.154 CaP2H2O7 + Li -> LiP(HO2)2 + 0.07692 CaP2(HO)4 + 0.5385 Ca2P2O7 + 0.07692 P	2.5 CaP2H2O7 -> PH3O4 + CaP4(HO6)2 + 0.75 O2 + 1.5 Ca	-0.027595513629800728	-0.12834397080882787	-0.08086071010850615
CaP2H5NO7	2.2570863642270833	3.2077964012499414	2.286 CaP2H5NO7 + 2.464 Li -> Ca2P2O7 + 1.143 PH9(NO2)2 + 0.2857 CaP2(HO)4 + 0.8214 Li3PO4 + 0.03571 P	1.6 CaP2H5NO7 -> CaP2H2O7 + 0.6 PH6NO4 + 0.6 PH4NO3 + 0.2 N2 + 0.6 Ca	-0.014673750769483185	-0.1286847082196949	-0.2264269177524052
CaP4(HO6)2	2.816614483166507	5.103856598750129	CaP4(HO6)2 + 1.667 Li -> CaP2H2O7 + 1.667 LiPO3 + 0.3333 P	1.2 CaP4(HO6)2 -> CaP4O11 + 0.8 PH3O4 + 0.1 O2 + 0.2 Ca	-0.051442210801037724	-0.12918515010988085	-0.13527889837039542
CaP4O11	2.888221012166654	5.237247576249676	2 CaP4O11 + 1.667 Li -> Ca2P6O17 + 1.667 LiPO3 + 0.3333 P	0.5 CaP4O11 -> P2O5 + 0.25 O2 + 0.5 Ca	-0.06836776100262654	-0.13656217781975988	-0.16305638011840262
CaPHO4	2.2173390893750344	4.120821227499946	3.812 CaPHO4 + 3 Li -> Li3PO4 + 0.6875 Ca5P3HO13 + 0.375 CaP2(HO)4 + 0.8125 H2O	2 CaPHO4 -> CaP2H2O7 + 0.5 O2 + Ca	-0.02204846921874859	-0.1457128774999863	-0.05199792394365632
CaPS3	1.8433152363888656	2.5357165812499973	2 CaPS3 + 3 Li -> Li3PS4 + 2 CaS + P	4 CaPS3 -> P2S5 + P2S7 + 4 Ca	-3.552713678800501e-15	-0.17636399645833256	-0.9050544770945612
CaPSe3	1.794441707499999	2.4878779474609445	0.5 CaPSe3 + 2 Li -> Li2Se + 0.5 CaSe + 0.5 P	2 CaPSe3 -> P2Se5 + Se + 2 Ca	-8.881784197001252e-16	-0.15474121369788496	-0.935576267060624
CaPbF6	4.562361453333308	6.4055603975	0.5 CaPbF6 + Li -> LiF + 0.5 CaF2 + 0.5 PbF2	CaPbF6 -> CaF2 + 2 F2 + Pb	-0.33545800635416834	-0.008295856666667323	-0.14831229914062716
CaPdF4	4.159234833333325	4.164107435000045	0.5 CaPdF4 + Li -> LiF + 0.5 CaF2 + 0.5 Pd	1.5 CaPdF4 -> PdF3 + 1.5 CaF2 + 0.5 Pd	-0.46682441929688023	-0.05565803099999922	-0.2636042899999924
CaPdF6	4.557414543333341	6.581830887500015	1.5 CaPdF6 + Li -> PdF3 + 0.5 Li2PdF6 + 1.5 CaF2	CaPdF6 -> PdF4 + F2 + Ca	-0.6077125494791726	-3.552713678800501e-15	-0.2705850840625006
CaPr(MoO3)2	1.5710660909226148	2.2164402771875187	0.8571 CaPr(MoO3)2 + 2 Li -> Li2MoO3 + 0.8571 CaO + 0.4286 Pr2O3 + 0.7143 Mo	4 CaPr(MoO3)2 -> Ca2Pr4(Mo2O7)3 + 0.5 Mo + 1.5 MoO2 + 2 Ca	-0.3682928933254104	-0.3251991065384634	-0.2926457129914559
CaPrAl3O7	0.7545989990589952	3.466661749999966	6 CaPrAl3O7 + 4.429 Li -> Ca6Al7O16 + 0.2857 PrAl3 + 5.714 PrAlO3 + 4.429 LiAlO2	2 CaPrAl3O7 -> CaAl4O7 + 2 PrAlO3 + 0.5 O2 + Ca	-0.10773631226371183	-0.34626364618749816	-0.07005384047799579
CaReH4ClO6	2.3041980926190284	4.338291314062523	CaReH4ClO6 + 0.875 Li -> CaHClO + 0.875 LiReO4 + 1.5 H2O + 0.125 Re	4 CaReH4ClO6 -> ReH3O5 + H7ClO7 + 3 ReClO3 + 3 H2O + 4 Ca	-0.20653507013608774	-0.12089561111787406	-0.05166193557018062
CaReN3	1.1265317936888792	1.5839824833333431	2.4 CaReN3 + 5 Li -> Li5ReN4 + 0.8 Ca3ReN4 + 0.6 Re	CaReN3 -> N2 + ReN + Ca	-0.21314083827846675	-0.4322012744509651	-0.6065730849248303
CaS	6.661338147750939e-16	2.571927721562498	Li -> Li	CaS -> S + Ca	-1.2326076270774423e-15	-0.34188194166666674	-0.701368653714284
CaS2(ClO3)2	3.6997475502083326	3.2294308906041715	2 Li + 2 S(ClO)2 + 0.5 CaCl2 -> 0.5 CaS2(ClO3)2 + SCl2O + 2 LiCl	4 CaS2(ClO3)2 -> CaCl2 + 6 ClO2 + 3 CaSO4 + 5 S	-0.27457134568063957	-0.08359399426283276	-0.2020274683244696
CaS3O10	3.907542605208354	3.2309822148958336	1.5 CaS3O10 + 2 Li -> Li2S2O7 + 1.5 CaSO4 + SO2	CaS3O10 -> CaSO4 + 3 O2 + 2 S	-0.2864331055791136	-0.10186348742424034	-0.16404134241379875
CaSO4	1.9868122489583546	3.7491509180208333	1.25 CaSO4 + 2 Li -> Li2SO4 + CaO + 0.25 CaS	CaSO4 -> CaO2 + O2 + S	-0.1515859313983099	-0.10924325453123318	-2.5267529718912365e-14
CaSc2O4	0.13557580083334742	3.3345771706249794	0.5 CaSc2O4 + Li -> LiScO2 + 0.5 Ca	CaSc2O4 -> Sc2O3 + 0.5 O2 + Ca	-0.14721540215911677	-0.3858573215217387	-0.08655900690347185
CaSe	0.0	2.4303177761718766	Li -> Li	CaSe -> Se + Ca	0.0	-0.2588718223610409	-0.4777123545177744
CaSe2O5	2.7912964404948397	3.9542931062500086	2 CaSe2O5 + Li -> Ca2Se3O8 + 0.5 Li2SeO4 + 0.5 Se	2 CaSe2O5 -> CaSeO4 + 3 SeO2 + Ca	-0.43318600246876127	-0.16146944908333527	-0.13776707685897582
CaSeO3	1.9500610145833313	3.428703571249968	0.5 CaSeO3 + 3 Li -> Li2O + 0.5 Li2Se + 0.5 CaO	4 CaSeO3 -> Ca2Se3O8 + CaSeO4 + Ca	-0.32750438823796113	-0.19441407056819138	-0.08618477037356786
CaSeO4	2.871623415416664	4.485764847500002	2 CaSeO4 + 2 Li -> Li2SeO4 + CaSeO3 + CaO	2 CaSeO4 -> Se2O5 + 1.5 O2 + 2 Ca	-0.5180467255427637	-0.13294728593749872	-0.02614579759721547
[truncated: 10,570 more rows]
